# Supplementary material
Source: publisher figshare collection journal article supplement (https://acs.figshare.com/ndownloader/files/8357015)
Supplement: Supplementary file 1 [file 8357015]

 
data_rv2045_sq
 
_audit_creation_method            'SHELXL-2016/6'
_shelx_SHELXL_version_number      '2016/6'
_chemical_name_systematic         ?
_chemical_name_common             ?
_chemical_melting_point           ?
_chemical_formula_moiety          ?
_chemical_formula_sum
 'C60 H64 I2 N32 O14' 
_chemical_formula_weight          1711.23

loop_
 _atom_type_symbol
 _atom_type_description
 _atom_type_scat_dispersion_real
 _atom_type_scat_dispersion_imag
 _atom_type_scat_source
 'C'  'C'   0.0033   0.0016
 'International Tables Vol C Tables 4.2.6.8 and 6.1.1.4'
 'H'  'H'   0.0000   0.0000
 'International Tables Vol C Tables 4.2.6.8 and 6.1.1.4'
 'N'  'N'   0.0061   0.0033
 'International Tables Vol C Tables 4.2.6.8 and 6.1.1.4'
 'O'  'O'   0.0106   0.0060
 'International Tables Vol C Tables 4.2.6.8 and 6.1.1.4'
 'I'  'I'  -0.4742   1.8119
 'International Tables Vol C Tables 4.2.6.8 and 6.1.1.4'
 
_space_group_crystal_system       monoclinic
_space_group_IT_number            14
_space_group_name_H-M_alt         'P 21/c'
_space_group_name_Hall            '-P 2ybc'
 
_shelx_space_group_comment
;
The symmetry employed for this shelxl refinement is uniquely defined
by the following loop, which should always be used as a source of
symmetry information in preference to the above space-group names.
They are only intended as comments.
;
 
loop_
 _space_group_symop_operation_xyz
 'x, y, z'
 '-x, y+1/2, -z+1/2'
 '-x, -y, -z'
 'x, -y-1/2, z-1/2'
 
_cell_length_a                    17.0396(3)
_cell_length_b                    27.7804(6)
_cell_length_c                    34.0065(6)
_cell_angle_alpha                 90
_cell_angle_beta                  90.253(2)
_cell_angle_gamma                 90
_cell_volume                      16097.4(5)
_cell_formula_units_Z             8
_cell_measurement_temperature     120(2)
_cell_measurement_reflns_used   19669
_cell_measurement_theta_min     2.3230
_cell_measurement_theta_max     27.7170
 
_exptl_crystal_description          block
_exptl_crystal_colour               'colourless'
_exptl_crystal_density_meas       ?
_exptl_crystal_density_method     ?
_exptl_crystal_density_diffrn     1.412          
_exptl_crystal_F_000              6928
_exptl_transmission_factor_min    ?
_exptl_transmission_factor_max    ?
_exptl_crystal_size_max           0.200
_exptl_crystal_size_mid           0.200
_exptl_crystal_size_min           0.100
_exptl_absorpt_coefficient_mu     0.858
_shelx_estimated_absorpt_T_min    0.847
_shelx_estimated_absorpt_T_max    0.919
_exptl_absorpt_correction_type            multi-scan
_exptl_absorpt_correction_T_min                   0.92545
_exptl_absorpt_correction_T_max                   1.00000
_exptl_absorpt_process_details
;
CrysAlisPro 1.171.38.43 (Rigaku Oxford Diffraction, 2015)
Empirical absorption correction using spherical harmonics,
 implemented in SCALE3 ABSPACK scaling algorithm.
;
_exptl_absorpt_special_details    ?
_diffrn_ambient_temperature       120(2)
_diffrn_radiation_wavelength      0.71073
_diffrn_radiation_type            MoK\a
_diffrn_source                      'Rotating Anode MicroMax-007HF DW 1.2 kW'
_diffrn_measurement_device_type     'AFC11 (Right): Eulerian 3 circle'
_diffrn_measurement_method          'Profile data from \w-scans'
_diffrn_detector_area_resol_mean  ?
_diffrn_reflns_number             92568
_diffrn_reflns_av_unetI/netI      0.0522
_diffrn_reflns_av_R_equivalents   0.0401
_diffrn_reflns_limit_h_min        -23
_diffrn_reflns_limit_h_max        22
_diffrn_reflns_limit_k_min        -36
_diffrn_reflns_limit_k_max        38
_diffrn_reflns_limit_l_min        -45
_diffrn_reflns_limit_l_max        36
_diffrn_reflns_theta_min          1.841
_diffrn_reflns_theta_max          29.872
_diffrn_reflns_theta_full         25.242
_diffrn_measured_fraction_theta_max   0.812
_diffrn_measured_fraction_theta_full  0.992
_diffrn_reflns_Laue_measured_fraction_max    0.812
_diffrn_reflns_Laue_measured_fraction_full   0.992
_diffrn_reflns_point_group_measured_fraction_max   0.812
_diffrn_reflns_point_group_measured_fraction_full  0.992
_reflns_number_total              37706
_reflns_number_gt                 24393
_reflns_threshold_expression      'I > 2\s(I)'
_reflns_Friedel_coverage          0.000
_reflns_Friedel_fraction_max      .
_reflns_Friedel_fraction_full     .
 
_reflns_special_details
;
 Reflections were merged by SHELXL according to the crystal
 class for the calculation of statistics and refinement.
 
 Structure factors included contributions from the .fab file.
 
 _reflns_Friedel_fraction is defined as the number of unique
 Friedel pairs measured divided by the number that would be
 possible theoretically, ignoring centric projections and
 systematic absences.
;
 
_computing_data_collection
;
Rigaku CrystalClear-SM Expert 2.1 b32 (Rigaku, 2014)
MSCServDetCCD = {5.7.3.4}
;
_computing_cell_refinement     'CrysAlisPro 1.171.38.43 (Rigaku OD, 2015)'
_computing_data_reduction      'CrysAlisPro 1.171.38.43 (Rigaku OD, 2015)'
_computing_structure_solution     'SHELXT 2014/5 (Sheldrick, 2014)'
_computing_structure_refinement 'SHELXL-2016/6 (Sheldrick, 2016)'
_computing_molecular_graphics     ?
_computing_publication_material   ?
_refine_special_details           ?
_refine_ls_structure_factor_coef  Fsqd
_refine_ls_matrix_type            full
_refine_ls_weighting_scheme       calc
_refine_ls_weighting_details
'w=1/[\s^2^(Fo^2^)+(0.1830P)^2^+41.9045P] where P=(Fo^2^+2Fc^2^)/3'
_atom_sites_solution_primary      ?
_atom_sites_solution_secondary    ?
_atom_sites_solution_hydrogens    geom
_refine_ls_hydrogen_treatment     constr
_refine_ls_extinction_method      none
_refine_ls_extinction_coef        .
_refine_ls_number_reflns          37706
_refine_ls_number_parameters      2021
_refine_ls_number_restraints      2395
_refine_ls_R_factor_all           0.1387
_refine_ls_R_factor_gt            0.1010
_refine_ls_wR_factor_ref          0.3243
_refine_ls_wR_factor_gt           0.2914
_refine_ls_goodness_of_fit_ref    1.015
_refine_ls_restrained_S_all       1.011
_refine_ls_shift/su_max           0.002
_refine_ls_shift/su_mean          0.000
 
loop_
 _atom_site_label
 _atom_site_type_symbol
 _atom_site_fract_x
 _atom_site_fract_y
 _atom_site_fract_z
 _atom_site_U_iso_or_equiv
 _atom_site_adp_type
 _atom_site_occupancy
 _atom_site_site_symmetry_order  
 _atom_site_calc_flag
 _atom_site_refinement_flags_posn
 _atom_site_refinement_flags_adp
 _atom_site_refinement_flags_occupancy
 _atom_site_disorder_assembly
 _atom_site_disorder_group
I1 I 0.69550(3) 0.40431(2) 0.51079(2) 0.06236(16) Uani 1 1 d . U . . .
I2A I 0.47457(10) 1.00415(4) 0.11818(2) 0.0460(3) Uani 0.728(5) 1 d . U P . .
I2B I 0.4390(4) 0.99602(10) 0.11594(7) 0.0593(8) Uani 0.272(5) 1 d . U P . .
I3A I 0.05559(11) 0.98146(6) 0.58127(4) 0.0907(6) Uani 0.568(4) 1 d . U P . .
I3B I 0.1020(2) 0.95878(12) 0.56818(9) 0.1123(12) Uani 0.346(4) 1 d . U P . .
I3C I 0.1766(5) 0.9277(2) 0.5476(2) 0.142(3) Uani 0.164(3) 1 d . U P . .
I4A I 0.27595(19) 0.41868(12) 0.21827(11) 0.0807(14) Uani 0.172(2) 1 d . U P . .
I4B I 1.1918(3) 0.93742(13) 0.43992(13) 0.1071(18) Uani 0.187(3) 1 d . U P . .
I4C I 0.2976(4) 0.9544(3) 0.0879(2) 0.084(3) Uani 0.090(2) 1 d . U P . .
I4D I 1.1178(5) 0.5536(3) 0.4618(3) 0.188(4) Uani 0.177(4) 1 d . U P . .
I4E I 0.7066(8) 0.9884(5) 0.6417(4) 0.376(8) Uani 0.295(5) 1 d . U P . .
O1_1 O 0.0831(4) 0.8998(2) 0.23785(17) 0.0894(19) Uani 1 1 d . . . . .
O2_1 O 0.3613(4) 0.8440(2) 0.13502(18) 0.100(2) Uani 1 1 d . . . . .
O3_1 O -0.0140(3) 0.7925(2) 0.19860(13) 0.0773(16) Uani 1 1 d . . . . .
O4_1 O 0.2708(4) 0.7495(3) 0.09777(19) 0.105(2) Uani 1 1 d . . . . .
O5_1 O -0.0128(3) 0.67077(19) 0.23768(16) 0.0683(12) Uani 1 1 d . . . . .
O6_1 O 0.2720(4) 0.6205(2) 0.13978(17) 0.0881(18) Uani 1 1 d . . . . .
O7_1 O 0.0765(3) 0.6070(2) 0.3263(2) 0.0818(15) Uani 1 1 d . . . . .
O8_1 O 0.3625(4) 0.5666(2) 0.22241(18) 0.0821(16) Uani 1 1 d . . . . .
O9_1 O 0.1886(2) 0.66220(16) 0.38991(12) 0.0523(10) Uani 1 1 d . . . . .
O10_1 O 0.4873(3) 0.62258(19) 0.29798(13) 0.0617(12) Uani 1 1 d . . . . .
O11_1 O 0.2443(3) 0.79337(18) 0.38562(14) 0.0612(11) Uani 1 1 d . . . . .
O12_1 O 0.5512(2) 0.7457(2) 0.30369(14) 0.0640(12) Uani 1 1 d . . . . .
O13_1 O 0.2016(4) 0.90356(19) 0.3263(2) 0.096(2) Uani 1 1 d . . . . .
O14_1 O 0.4855(4) 0.8390(2) 0.2296(2) 0.0938(19) Uani 1 1 d . . . . .
N1_1 N 0.2009(6) 0.9280(2) 0.2171(3) 0.099(2) Uani 1 1 d . . . . .
N2_1 N 0.1202(5) 0.8920(3) 0.1723(2) 0.0899(19) Uani 1 1 d . . . . .
N3_1 N 0.3150(6) 0.9014(3) 0.1770(3) 0.098(2) Uani 1 1 d . . . . .
N4_1 N 0.2340(5) 0.8702(3) 0.1312(2) 0.095(2) Uani 1 1 d . . . . .
N5_1 N 0.0614(4) 0.8209(3) 0.14796(17) 0.0764(16) Uani 1 1 d . . . . .
N6_1 N 0.0212(4) 0.7436(3) 0.14657(17) 0.0757(16) Uani 1 1 d . . . . .
N7_1 N 0.1667(4) 0.8026(3) 0.10129(19) 0.0860(19) Uani 1 1 d . . . . .
N8_1 N 0.1428(4) 0.7262(3) 0.11185(17) 0.0784(17) Uani 1 1 d . . . . .
N9_1 N 0.0270(4) 0.6649(3) 0.1742(2) 0.0833(19) Uani 1 1 d . . . . .
N10_1 N 0.0590(4) 0.6060(3) 0.2151(2) 0.0777(17) Uani 1 1 d . . . . .
N11_1 N 0.1436(5) 0.6463(3) 0.1354(2) 0.0873(19) Uani 1 1 d . . . . .
N12_1 N 0.1689(5) 0.5836(3) 0.1741(3) 0.0893(19) Uani 1 1 d . . . . .
N13_1 N 0.1189(4) 0.5682(2) 0.2707(3) 0.0788(17) Uani 1 1 d . . . . .
N14_1 N 0.1879(4) 0.5606(2) 0.3245(2) 0.0787(16) Uani 1 1 d . . . . .
N15_1 N 0.2319(5) 0.5464(2) 0.2284(2) 0.0848(18) Uani 1 1 d . . . . .
N16_1 N 0.3018(4) 0.5493(2) 0.2823(2) 0.0762(16) Uani 1 1 d . . . . .
N17_1 N 0.2688(3) 0.5996(2) 0.37259(17) 0.0597(12) Uani 1 1 d . . . . .
N18_1 N 0.3240(3) 0.6673(2) 0.39212(13) 0.0509(11) Uani 1 1 d . . . . .
N19_1 N 0.3829(3) 0.5871(2) 0.33101(17) 0.0617(13) Uani 1 1 d . . . . .
N20_1 N 0.4463(3) 0.6484(2) 0.35887(14) 0.0530(11) Uani 1 1 d . . . . .
N21_1 N 0.3610(3) 0.7506(2) 0.39363(15) 0.0568(12) Uani 1 1 d . . . . .
N22_1 N 0.3652(4) 0.8267(2) 0.3721(2) 0.0767(17) Uani 1 1 d . . . . .
N23_1 N 0.4868(3) 0.7318(3) 0.36213(16) 0.0623(13) Uani 1 1 d . . . . .
N24_1 N 0.4873(3) 0.8061(3) 0.3379(2) 0.0745(16) Uani 1 1 d . . . . .
N25_1 N 0.3370(5) 0.8920(3) 0.3289(3) 0.092(2) Uani 1 1 d . . . . .
N26_1 N 0.2824(5) 0.9270(2) 0.2755(3) 0.098(2) Uani 1 1 d . . . . .
N27_1 N 0.4504(5) 0.8682(2) 0.2902(3) 0.0882(19) Uani 1 1 d . . . . .
N28_1 N 0.3931(5) 0.8990(3) 0.2367(3) 0.096(2) Uani 1 1 d . . . . .
C1_1 C 0.1308(6) 0.9052(3) 0.2117(3) 0.089(2) Uani 1 1 d . . . . .
C2_1 C 0.3087(6) 0.8687(3) 0.1462(3) 0.089(2) Uani 1 1 d . . . . .
C3_1 C 0.2404(7) 0.9321(3) 0.1780(3) 0.104(3) Uani 1 1 d . . . . .
H3_1 H 0.251278 0.966388 0.170971 0.124 Uiso 1 1 calc R U . . .
C4_1 C 0.1862(7) 0.9084(4) 0.1486(3) 0.102(3) Uani 1 1 d . . . . .
H4_1 H 0.168542 0.931923 0.128097 0.123 Uiso 1 1 calc R U . . .
C5_1 C 0.0532(6) 0.8704(4) 0.1576(3) 0.093(2) Uani 1 1 d . . . . .
H5A_1 H 0.036468 0.888046 0.133670 0.111 Uiso 1 1 calc R U . . .
H5B_1 H 0.010912 0.873734 0.177260 0.111 Uiso 1 1 calc R U . . .
C6_1 C 0.2095(6) 0.8446(4) 0.0964(2) 0.094(2) Uani 1 1 d . . . . .
H6A_1 H 0.177644 0.866912 0.080122 0.113 Uiso 1 1 calc R U . . .
H6B_1 H 0.257065 0.836644 0.081095 0.113 Uiso 1 1 calc R U . . .
C7_1 C 0.0212(4) 0.7870(3) 0.16779(18) 0.0724(18) Uani 1 1 d . . . . .
C8_1 C 0.1963(5) 0.7580(4) 0.1036(2) 0.079(2) Uani 1 1 d . . . . .
C9_1 C 0.0860(5) 0.8039(4) 0.10881(19) 0.083(2) Uani 1 1 d . . . . .
H9_1 H 0.056564 0.820672 0.087296 0.100 Uiso 1 1 calc R U . . .
C10_1 C 0.0654(5) 0.7498(4) 0.1107(2) 0.081(2) Uani 1 1 d . . . . .
H10_1 H 0.034306 0.739469 0.087142 0.098 Uiso 1 1 calc R U . . .
C11_1 C -0.0217(5) 0.7027(4) 0.1573(3) 0.083(2) Uani 1 1 d . . . . .
H11A_1 H -0.049175 0.689882 0.133851 0.099 Uiso 1 1 calc R U . . .
H11B_1 H -0.062088 0.712050 0.176748 0.099 Uiso 1 1 calc R U . . .
C12_1 C 0.1531(6) 0.6768(4) 0.1023(3) 0.100(3) Uani 1 1 d . . . . .
H12A_1 H 0.114533 0.667588 0.081777 0.120 Uiso 1 1 calc R U . . .
H12B_1 H 0.206282 0.672079 0.091364 0.120 Uiso 1 1 calc R U . . .
C13_1 C 0.0212(4) 0.6502(3) 0.2109(3) 0.0722(18) Uani 1 1 d . . . . .
C14_1 C 0.2028(5) 0.6175(4) 0.1486(3) 0.083(2) Uani 1 1 d . . . . .
C15_1 C 0.0664(5) 0.6302(4) 0.1479(3) 0.094(2) Uani 1 1 d . . . . .
H15_1 H 0.032389 0.619828 0.125468 0.113 Uiso 1 1 calc R U . . .
C16_1 C 0.0835(6) 0.5884(4) 0.1778(3) 0.092(2) Uani 1 1 d . . . . .
H16_1 H 0.055498 0.558115 0.170407 0.111 Uiso 1 1 calc R U . . .
C17_1 C 0.0471(5) 0.5754(3) 0.2489(3) 0.089(2) Uani 1 1 d . . . . .
H17A_1 H 0.007366 0.590154 0.266336 0.107 Uiso 1 1 calc R U . . .
H17B_1 H 0.026656 0.543790 0.240118 0.107 Uiso 1 1 calc R U . . .
C18_1 C 0.2158(6) 0.5434(3) 0.1879(3) 0.099(3) Uani 1 1 d . . . . .
H18A_1 H 0.187456 0.512992 0.182369 0.119 Uiso 1 1 calc R U . . .
H18B_1 H 0.265828 0.542642 0.173211 0.119 Uiso 1 1 calc R U . . .
C19_1 C 0.1226(5) 0.5815(3) 0.3087(3) 0.0753(18) Uani 1 1 d . . . . .
C20_1 C 0.3054(5) 0.5557(3) 0.2427(3) 0.0724(17) Uani 1 1 d . . . . .
C21_1 C 0.1775(6) 0.5327(3) 0.2599(3) 0.091(2) Uani 1 1 d . . . . .
H21_1 H 0.152822 0.500740 0.254452 0.109 Uiso 1 1 calc R U . . .
C22_1 C 0.2283(5) 0.5310(3) 0.2964(3) 0.085(2) Uani 1 1 d . . . . .
H22_1 H 0.234111 0.497259 0.306302 0.102 Uiso 1 1 calc R U . . .
C23_1 C 0.2091(5) 0.5650(3) 0.3660(3) 0.0792(19) Uani 1 1 d . . . . .
H23A_1 H 0.161888 0.574112 0.381155 0.095 Uiso 1 1 calc R U . . .
H23B_1 H 0.227238 0.533295 0.375792 0.095 Uiso 1 1 calc R U . . .
C24_1 C 0.3746(5) 0.5465(3) 0.3049(3) 0.078(2) Uani 1 1 d . . . . .
H24A_1 H 0.375089 0.516349 0.320414 0.093 Uiso 1 1 calc R U . . .
H24B_1 H 0.419649 0.545590 0.286604 0.093 Uiso 1 1 calc R U . . .
C25_1 C 0.2527(3) 0.6448(2) 0.38558(16) 0.0478(12) Uani 1 1 d . . . . .
C26_1 C 0.4425(4) 0.6196(3) 0.32665(17) 0.0534(13) Uani 1 1 d . . . . .
C27_1 C 0.3521(4) 0.5894(3) 0.3706(2) 0.0626(15) Uani 1 1 d . . . . .
H27_1 H 0.366134 0.560017 0.386099 0.075 Uiso 1 1 calc R U . . .
C28_1 C 0.3887(3) 0.6340(3) 0.38797(17) 0.0567(14) Uani 1 1 d . . . . .
H28_1 H 0.414036 0.627028 0.413928 0.068 Uiso 1 1 calc R U . . .
C29_1 C 0.3284(3) 0.7102(3) 0.41514(17) 0.0552(14) Uani 1 1 d . . . . .
H29A_1 H 0.361295 0.704028 0.438672 0.066 Uiso 1 1 calc R U . . .
H29B_1 H 0.275109 0.718788 0.424245 0.066 Uiso 1 1 calc R U . . .
C30_1 C 0.5088(4) 0.6819(3) 0.36627(19) 0.0638(15) Uani 1 1 d . . . . .
H30A_1 H 0.552268 0.674960 0.347898 0.077 Uiso 1 1 calc R U . . .
H30B_1 H 0.528808 0.676661 0.393316 0.077 Uiso 1 1 calc R U . . .
C31_1 C 0.3172(4) 0.7904(3) 0.3841(2) 0.0589(14) Uani 1 1 d . . . . .
C32_1 C 0.5118(4) 0.7596(3) 0.3319(2) 0.0627(15) Uani 1 1 d . . . . .
C33_1 C 0.4452(3) 0.7598(3) 0.3915(2) 0.0654(16) Uani 1 1 d . . . . .
H33_1 H 0.470823 0.757246 0.417917 0.078 Uiso 1 1 calc R U . . .
C34_1 C 0.4484(4) 0.8116(3) 0.3755(2) 0.077(2) Uani 1 1 d . . . . .
H34_1 H 0.478547 0.833282 0.393485 0.092 Uiso 1 1 calc R U . . .
C35_1 C 0.3407(6) 0.8761(3) 0.3682(3) 0.094(2) Uani 1 1 d . . . . .
H35A_1 H 0.288252 0.879794 0.380276 0.112 Uiso 1 1 calc R U . . .
H35B_1 H 0.377765 0.896802 0.382978 0.112 Uiso 1 1 calc R U . . .
C36_1 C 0.5116(5) 0.8476(3) 0.3129(3) 0.092(2) Uani 1 1 d . . . . .
H36A_1 H 0.534061 0.872898 0.330151 0.110 Uiso 1 1 calc R U . . .
H36B_1 H 0.553665 0.836775 0.294991 0.110 Uiso 1 1 calc R U . . .
C37_1 C 0.2681(7) 0.9072(3) 0.3124(3) 0.092(2) Uani 1 1 d . . . . .
C38_1 C 0.4475(6) 0.8652(3) 0.2495(3) 0.089(2) Uani 1 1 d . . . . .
C39_1 C 0.4031(6) 0.9081(3) 0.3059(4) 0.100(2) Uani 1 1 d . . . . .
H39_1 H 0.435957 0.932228 0.320285 0.120 Uiso 1 1 calc R U . . .
C40_1 C 0.3640(6) 0.9304(3) 0.2668(4) 0.101(3) Uani 1 1 d . . . . .
H40_1 H 0.380622 0.964494 0.262446 0.121 Uiso 1 1 calc R U . . .
C41_1 C 0.2241(7) 0.9519(3) 0.2516(4) 0.104(2) Uani 1 1 d . . . . .
H41A_1 H 0.176971 0.957469 0.267834 0.125 Uiso 1 1 calc R U . . .
H41B_1 H 0.245435 0.983759 0.244217 0.125 Uiso 1 1 calc R U . . .
C42_1 C 0.3844(7) 0.9133(3) 0.1947(3) 0.103(3) Uani 1 1 d . . . . .
H42A_1 H 0.391173 0.948594 0.192924 0.123 Uiso 1 1 calc R U . . .
H42B_1 H 0.427509 0.898256 0.179637 0.123 Uiso 1 1 calc R U . . .
O1_2 O 0.9887(3) 0.6282(2) 0.52529(16) 0.0830(17) Uani 1 1 d . . . . .
O2_2 O 0.8352(3) 0.65831(17) 0.36384(13) 0.0570(10) Uani 1 1 d . . . . .
O3_2 O 1.0786(3) 0.7526(2) 0.52393(14) 0.0731(14) Uani 1 1 d . . . . .
O4_2 O 0.9011(3) 0.78107(17) 0.36924(12) 0.0544(10) Uani 1 1 d . . . . .
O5_2 O 0.9785(3) 0.8452(2) 0.56260(14) 0.0742(14) Uani 1 1 d . . . . .
O6_2 O 0.8046(3) 0.89144(19) 0.41178(16) 0.0673(12) Uani 1 1 d . . . . .
O7_2 O 0.7874(4) 0.8501(3) 0.61660(18) 0.0964(19) Uani 1 1 d . . . . .
O8_2 O 0.6203(4) 0.8927(3) 0.4654(2) 0.0956(18) Uani 1 1 d . . . . .
O9_2 O 0.6493(4) 0.7599(3) 0.64275(17) 0.0918(19) Uani 1 1 d . . . . .
O10_2 O 0.4786(4) 0.7948(2) 0.48971(19) 0.0913(18) Uani 1 1 d . . . . .
O11_2 O 0.6599(3) 0.6274(2) 0.61633(14) 0.0790(16) Uani 1 1 d . . . . .
O12_2 O 0.4890(2) 0.67728(17) 0.46488(11) 0.0514(10) Uani 1 1 d . . . . .
O13_2 O 0.8119(4) 0.5628(3) 0.56587(17) 0.093(2) Uani 1 1 d . . . . .
O14_2 O 0.6593(3) 0.62051(16) 0.41143(12) 0.0519(9) Uani 1 1 d . . . . .
N1_2 N 0.9328(4) 0.5866(3) 0.4724(2) 0.0748(17) Uani 1 1 d . . . . .
N2_2 N 1.0151(3) 0.6464(2) 0.46037(17) 0.0609(13) Uani 1 1 d . . . . .
N3_2 N 0.8719(3) 0.5991(2) 0.40878(17) 0.0611(13) Uani 1 1 d . . . . .
N4_2 N 0.9563(3) 0.6573(2) 0.39610(17) 0.0575(13) Uani 1 1 d . . . . .
N5_2 N 1.0670(3) 0.7272(2) 0.46012(15) 0.0544(11) Uani 1 1 d . . . . .
N6_2 N 1.0724(3) 0.8048(2) 0.47131(15) 0.0577(12) Uani 1 1 d . . . . .
N7_2 N 1.0049(3) 0.7389(2) 0.39520(15) 0.0526(11) Uani 1 1 d . . . . .
N8_2 N 0.9896(3) 0.8153(2) 0.41271(14) 0.0502(11) Uani 1 1 d . . . . .
N9_2 N 1.0015(3) 0.8718(2) 0.49933(16) 0.0643(14) Uani 1 1 d . . . . .
N10_2 N 0.8996(4) 0.9031(2) 0.53228(18) 0.0704(15) Uani 1 1 d . . . . .
N11_2 N 0.9263(3) 0.8857(2) 0.43908(16) 0.0571(12) Uani 1 1 d . . . . .
N12_2 N 0.8343(4) 0.9241(2) 0.4724(2) 0.0701(15) Uani 1 1 d . . . . .
N13_2 N 0.7787(5) 0.9077(3) 0.5683(2) 0.0879(19) Uani 1 1 d . . . . .
N14_2 N 0.6702(5) 0.8784(3) 0.5936(2) 0.097(2) Uani 1 1 d . . . . .
N15_2 N 0.7096(5) 0.9255(3) 0.5078(2) 0.092(2) Uani 1 1 d . . . . .
N16_2 N 0.6030(5) 0.8947(3) 0.5328(3) 0.096(2) Uani 1 1 d . . . . .
N17_2 N 0.5747(5) 0.8168(3) 0.6121(2) 0.093(2) Uani 1 1 d . . . . .
N18_2 N 0.5372(4) 0.7416(3) 0.60801(18) 0.0753(16) Uani 1 1 d . . . . .
N19_2 N 0.5157(4) 0.8297(3) 0.5481(3) 0.092(2) Uani 1 1 d . . . . .
N20_2 N 0.4612(4) 0.7568(2) 0.54914(19) 0.0716(15) Uani 1 1 d . . . . .
N21_2 N 0.5458(3) 0.6566(2) 0.59138(15) 0.0622(13) Uani 1 1 d . . . . .
N22_2 N 0.5966(3) 0.5907(2) 0.56460(14) 0.0540(11) Uani 1 1 d . . . . .
N23_2 N 0.4709(3) 0.6737(2) 0.53233(14) 0.0568(12) Uani 1 1 d . . . . .
N24_2 N 0.5338(3) 0.61416(19) 0.50286(13) 0.0469(10) Uani 1 1 d . . . . .
N25_2 N 0.7003(3) 0.5489(2) 0.52911(16) 0.0607(13) Uani 1 1 d . . . . .
N26_2 N 0.8142(3) 0.5509(3) 0.49879(19) 0.0723(17) Uani 1 1 d . . . . .
N27_2 N 0.6395(3) 0.57575(18) 0.46773(14) 0.0472(10) Uani 1 1 d . . . . .
N28_2 N 0.7518(3) 0.5670(2) 0.43581(16) 0.0577(13) Uani 1 1 d . . . . .
C1_2 C 0.9792(4) 0.6222(3) 0.4899(2) 0.0688(18) Uani 1 1 d . . . . .
C2_2 C 0.8832(4) 0.6402(2) 0.38677(18) 0.0491(12) Uani 1 1 d . . . . .
C3_2 C 0.9415(4) 0.5849(3) 0.4306(2) 0.0660(16) Uani 1 1 d . . . . .
H3_2 H 0.962430 0.553170 0.421543 0.079 Uiso 1 1 calc R U . . .
C4_2 C 0.9994(4) 0.6265(2) 0.4223(2) 0.0594(14) Uani 1 1 d . . . . .
H4_2 H 1.048571 0.614401 0.409766 0.071 Uiso 1 1 calc R U . . .
C5_2 C 1.0821(4) 0.6764(3) 0.4678(2) 0.0611(15) Uani 1 1 d . . . . .
H5A_2 H 1.126005 0.665504 0.451004 0.073 Uiso 1 1 calc R U . . .
H5B_2 H 1.098489 0.672455 0.495553 0.073 Uiso 1 1 calc R U . . .
C6_2 C 0.9923(4) 0.6961(2) 0.37340(18) 0.0567(15) Uani 1 1 d . . . . .
H6A_2 H 1.043319 0.684728 0.363122 0.068 Uiso 1 1 calc R U . . .
H6B_2 H 0.958202 0.703584 0.350562 0.068 Uiso 1 1 calc R U . . .
C7_2 C 1.0723(3) 0.7600(3) 0.48839(18) 0.0560(14) Uani 1 1 d . . . . .
C8_2 C 0.9585(3) 0.7786(2) 0.39055(15) 0.0483(12) Uani 1 1 d . . . . .
C9_2 C 1.0720(3) 0.7477(2) 0.42038(17) 0.0508(13) Uani 1 1 d . . . . .
H9_2 H 1.122417 0.739020 0.407200 0.061 Uiso 1 1 calc R U . . .
C10_2 C 1.0665(3) 0.8022(2) 0.42876(17) 0.0506(13) Uani 1 1 d . . . . .
H10_2 H 1.109731 0.820462 0.415690 0.061 Uiso 1 1 calc R U . . .
C11_2 C 1.0765(4) 0.8492(3) 0.4932(2) 0.0665(17) Uani 1 1 d . . . . .
H11A_2 H 1.101065 0.842685 0.519057 0.080 Uiso 1 1 calc R U . . .
H11B_2 H 1.110956 0.871950 0.478919 0.080 Uiso 1 1 calc R U . . .
C12_2 C 0.9661(4) 0.8640(3) 0.40577(18) 0.0566(14) Uani 1 1 d . . . . .
H12A_2 H 0.930705 0.864957 0.382617 0.068 Uiso 1 1 calc R U . . .
H12B_2 H 1.013152 0.883411 0.399467 0.068 Uiso 1 1 calc R U . . .
C13_2 C 0.9605(5) 0.8708(3) 0.5341(2) 0.0652(15) Uani 1 1 d . . . . .
C14_2 C 0.8513(4) 0.8986(2) 0.4381(2) 0.0562(14) Uani 1 1 d . . . . .
C15_2 C 0.9686(4) 0.9063(3) 0.4726(2) 0.0614(15) Uani 1 1 d . . . . .
H15_2 H 1.008468 0.930498 0.464129 0.074 Uiso 1 1 calc R U . . .
C16_2 C 0.9011(5) 0.9300(3) 0.4968(2) 0.0695(16) Uani 1 1 d . . . . .
H16_2 H 0.911959 0.964855 0.502001 0.083 Uiso 1 1 calc R U . . .
C17_2 C 0.8598(6) 0.9208(3) 0.5670(3) 0.084(2) Uani 1 1 d . . . . .
H17A_2 H 0.886557 0.908017 0.590651 0.101 Uiso 1 1 calc R U . . .
H17B_2 H 0.863977 0.956338 0.567687 0.101 Uiso 1 1 calc R U . . .
C18_2 C 0.7619(6) 0.9490(3) 0.4793(3) 0.094(3) Uani 1 1 d . . . . .
H18A_2 H 0.733510 0.952380 0.454006 0.112 Uiso 1 1 calc R U . . .
H18B_2 H 0.774112 0.981840 0.488935 0.112 Uiso 1 1 calc R U . . .
C19_2 C 0.7481(7) 0.8769(4) 0.5945(3) 0.091(2) Uani 1 1 d . . . . .
C20_2 C 0.6413(6) 0.9035(3) 0.4981(4) 0.087(2) Uani 1 1 d . . . . .
C21_2 C 0.7181(6) 0.9361(3) 0.5490(3) 0.094(2) Uani 1 1 d . . . . .
H21_2 H 0.723075 0.971380 0.554397 0.113 Uiso 1 1 calc R U . . .
C22_2 C 0.6424(7) 0.9142(4) 0.5659(4) 0.106(3) Uani 1 1 d . . . . .
H22_2 H 0.609696 0.939232 0.579232 0.128 Uiso 1 1 calc R U . . .
C23_2 C 0.6209(7) 0.8588(4) 0.6250(3) 0.110(4) Uani 1 1 d . . . . .
H23A_2 H 0.584645 0.884258 0.634248 0.132 Uiso 1 1 calc R U . . .
H23B_2 H 0.654672 0.849371 0.647466 0.132 Uiso 1 1 calc R U . . .
C24_2 C 0.5226(6) 0.8780(4) 0.5339(4) 0.107(3) Uani 1 1 d . . . . .
H24A_2 H 0.491758 0.899622 0.551140 0.128 Uiso 1 1 calc R U . . .
H24B_2 H 0.499847 0.879910 0.507144 0.128 Uiso 1 1 calc R U . . .
C25_2 C 0.5941(6) 0.7709(4) 0.6228(2) 0.082(2) Uani 1 1 d . . . . .
C26_2 C 0.4844(5) 0.7939(3) 0.5251(3) 0.084(2) Uani 1 1 d . . . . .
C27_2 C 0.5039(6) 0.8202(4) 0.5895(3) 0.094(2) Uani 1 1 d . . . . .
H27_2 H 0.465363 0.842951 0.601516 0.112 Uiso 1 1 calc R U . . .
C28_2 C 0.4737(5) 0.7682(3) 0.5895(2) 0.0809(19) Uani 1 1 d . . . . .
H28_2 H 0.424011 0.765201 0.604919 0.097 Uiso 1 1 calc R U . . .
C29_2 C 0.5311(5) 0.6919(3) 0.62174(19) 0.077(2) Uani 1 1 d . . . . .
H29A_2 H 0.569151 0.686936 0.643459 0.092 Uiso 1 1 calc R U . . .
H29B_2 H 0.477853 0.686619 0.632410 0.092 Uiso 1 1 calc R U . . .
C30_2 C 0.4217(4) 0.7152(3) 0.5347(2) 0.0720(18) Uani 1 1 d . . . . .
H30A_2 H 0.400206 0.722355 0.508274 0.086 Uiso 1 1 calc R U . . .
H30B_2 H 0.376921 0.707970 0.552231 0.086 Uiso 1 1 calc R U . . .
C31_2 C 0.6064(4) 0.6259(3) 0.59279(17) 0.0590(15) Uani 1 1 d . . . . .
C32_2 C 0.4973(3) 0.6573(2) 0.49655(15) 0.0465(12) Uani 1 1 d . . . . .
C33_2 C 0.4849(4) 0.6406(3) 0.56359(17) 0.0582(14) Uani 1 1 d . . . . .
H33_2 H 0.435371 0.631135 0.577221 0.070 Uiso 1 1 calc R U . . .
C34_2 C 0.5245(4) 0.5976(2) 0.54330(16) 0.0533(13) Uani 1 1 d . . . . .
H34_2 H 0.490701 0.568206 0.544514 0.064 Uiso 1 1 calc R U . . .
C35_2 C 0.6452(4) 0.5479(3) 0.56134(19) 0.0608(15) Uani 1 1 d . . . . .
H35A_2 H 0.674805 0.543717 0.586222 0.073 Uiso 1 1 calc R U . . .
H35B_2 H 0.610594 0.519553 0.558108 0.073 Uiso 1 1 calc R U . . .
C36_2 C 0.5571(4) 0.5829(2) 0.47069(16) 0.0497(13) Uani 1 1 d . . . . .
H36A_2 H 0.531474 0.551168 0.474136 0.060 Uiso 1 1 calc R U . . .
H36B_2 H 0.537614 0.596790 0.445690 0.060 Uiso 1 1 calc R U . . .
C37_2 C 0.7795(4) 0.5544(3) 0.5350(2) 0.0691(18) Uani 1 1 d . . . . .
C38_2 C 0.6815(3) 0.5910(2) 0.43594(16) 0.0479(12) Uani 1 1 d . . . . .
C39_2 C 0.6795(4) 0.5379(2) 0.48904(19) 0.0526(13) Uani 1 1 d . . . . .
H39_2 H 0.650683 0.506624 0.487047 0.063 Uiso 1 1 calc R U . . .
C40_2 C 0.7610(4) 0.5350(2) 0.4695(2) 0.0609(15) Uani 1 1 d . . . . .
H40_2 H 0.773227 0.501418 0.460963 0.073 Uiso 1 1 calc R U . . .
C41_2 C 0.8996(4) 0.5476(3) 0.4951(3) 0.083(3) Uani 1 1 d . . . . .
H41A_2 H 0.923499 0.547627 0.521658 0.100 Uiso 1 1 calc R U . . .
H41B_2 H 0.913135 0.516654 0.482323 0.100 Uiso 1 1 calc R U . . .
C42_2 C 0.8051(4) 0.5683(3) 0.4030(2) 0.0594(16) Uani 1 1 d . . . . .
H42A_2 H 0.823921 0.535178 0.397738 0.071 Uiso 1 1 calc R U . . .
H42B_2 H 0.776030 0.579299 0.379376 0.071 Uiso 1 1 calc R U . . .
C1_3 C -0.0839(4) 0.8295(3) 0.2732(2) 0.070(2) Uani 1 1 d D . . . .
H1A_3 H -0.074223 0.858160 0.257186 0.104 Uiso 1 1 calc R U . . .
H1B_3 H -0.120215 0.837522 0.294491 0.104 Uiso 1 1 calc R U . . .
H1C_3 H -0.107006 0.804179 0.256720 0.104 Uiso 1 1 calc R U . . .
N1_3 N -0.0101(3) 0.81241(19) 0.28988(14) 0.0528(11) Uani 1 1 d D . . . .
C2_3 C 0.0196(3) 0.7689(2) 0.28647(15) 0.0457(11) Uani 1 1 d D . . . .
H2_3 H -0.002859 0.743095 0.271948 0.055 Uiso 1 1 calc R U . . .
N2_3 N 0.0869(2) 0.76715(15) 0.30695(12) 0.0396(9) Uani 1 1 d D . . . .
C3_3 C 0.0395(4) 0.8397(2) 0.31296(17) 0.0530(13) Uani 1 1 d D . . . .
H3_3 H 0.032221 0.872446 0.320107 0.064 Uiso 1 1 calc R U . . .
C4_3 C 0.0998(3) 0.8116(2) 0.32344(17) 0.0486(12) Uani 1 1 d D . . . .
H4_3 H 0.143376 0.820627 0.339317 0.058 Uiso 1 1 calc R U . . .
C5_3 C 0.1423(3) 0.7268(2) 0.30764(17) 0.0497(13) Uani 1 1 d D . . . .
H5A_3 H 0.113959 0.696343 0.302614 0.060 Uiso 1 1 calc R U . . .
H5B_3 H 0.167417 0.724660 0.333898 0.060 Uiso 1 1 calc R U . . .
C6_3 C 0.2032(3) 0.73396(19) 0.27725(15) 0.0429(11) Uani 1 1 d D . . . .
C7_3 C 0.1875(4) 0.7344(2) 0.23211(16) 0.0528(13) Uani 1 1 d D . . . .
H7_3 H 0.134940 0.730565 0.219277 0.063 Uiso 1 1 calc R U . . .
C8_3 C 0.2418(4) 0.7786(2) 0.22783(18) 0.0578(15) Uani 1 1 d D . . . .
H8_3 H 0.229582 0.807859 0.211850 0.069 Uiso 1 1 calc R U . . .
C9_3 C 0.2581(4) 0.7784(2) 0.27265(18) 0.0529(13) Uani 1 1 d D . . . .
H9_3 H 0.258075 0.807425 0.290020 0.064 Uiso 1 1 calc R U . . .
C1_4 C 0.6195(4) 0.6768(4) 0.2397(2) 0.086(3) Uani 1 1 d D . . . .
H1A_4 H 0.652149 0.654824 0.224337 0.129 Uiso 1 1 calc R U . . .
H1B_4 H 0.611032 0.663285 0.265987 0.129 Uiso 1 1 calc R U . . .
H1C_4 H 0.645936 0.708016 0.242118 0.129 Uiso 1 1 calc R U . . .
N1_4 N 0.5432(3) 0.6834(2) 0.21982(15) 0.0621(13) Uani 1 1 d D . . . .
C2_4 C 0.5046(4) 0.7250(3) 0.21627(19) 0.0652(16) Uani 1 1 d D . . . .
H2_4 H 0.521280 0.755316 0.226178 0.078 Uiso 1 1 calc R U . . .
N2_4 N 0.4378(3) 0.7164(2) 0.19618(14) 0.0548(12) Uani 1 1 d D . . . .
C3_4 C 0.4999(4) 0.6482(3) 0.20320(19) 0.0623(15) Uani 1 1 d D . . . .
H3_4 H 0.513627 0.615111 0.201897 0.075 Uiso 1 1 calc R U . . .
C4_4 C 0.4337(4) 0.6681(3) 0.18879(18) 0.0603(15) Uani 1 1 d D . . . .
H4_4 H 0.392060 0.651601 0.175908 0.072 Uiso 1 1 calc R U . . .
C5_4 C 0.3753(4) 0.7519(3) 0.19085(19) 0.0629(17) Uani 1 1 d D . . . .
H5A_4 H 0.351675 0.748252 0.164377 0.076 Uiso 1 1 calc R U . . .
H5B_4 H 0.397357 0.784771 0.192951 0.076 Uiso 1 1 calc R U . . .
C6_4 C 0.3141(3) 0.7448(2) 0.22141(16) 0.0482(12) Uani 1 1 d D . . . .
C7_4 C 0.2591(4) 0.7009(2) 0.22584(18) 0.0535(13) Uani 1 1 d D . . . .
H7_4 H 0.259347 0.672018 0.208243 0.064 Uiso 1 1 calc R U . . .
C8_4 C 0.2750(4) 0.6996(2) 0.27101(17) 0.0523(13) Uani 1 1 d D . . . .
H8_4 H 0.286856 0.670063 0.286817 0.063 Uiso 1 1 calc R U . . .
C9_4 C 0.3297(4) 0.7436(2) 0.26647(16) 0.0523(13) Uani 1 1 d D . . . .
H9_4 H 0.382328 0.747252 0.279264 0.063 Uiso 1 1 calc R U . . .
C1_5 C 0.7571(6) 0.7457(5) 0.3140(2) 0.110(4) Uani 1 1 d D . . . .
H1A_5 H 0.737046 0.764943 0.292007 0.164 Uiso 1 1 calc R U . . .
H1B_5 H 0.745084 0.711632 0.309394 0.164 Uiso 1 1 calc R U . . .
H1C_5 H 0.814105 0.749868 0.316096 0.164 Uiso 1 1 calc R U . . .
N1_5 N 0.7200(3) 0.7615(3) 0.35064(16) 0.0748(17) Uani 1 1 d D . . . .
C2_5 C 0.6962(3) 0.7330(3) 0.37901(18) 0.0581(14) Uani 1 1 d D . . . .
H2_5 H 0.699668 0.698919 0.378783 0.070 Uiso 1 1 calc R U . . .
N2_5 N 0.6663(3) 0.7593(2) 0.40824(15) 0.0557(12) Uani 1 1 d D . . . .
C3_5 C 0.7051(5) 0.8079(3) 0.3621(2) 0.086(2) Uani 1 1 d D . . . .
H3_5 H 0.716053 0.836181 0.347310 0.103 Uiso 1 1 calc R U . . .
C4_5 C 0.6722(5) 0.8063(3) 0.3979(2) 0.083(2) Uani 1 1 d D . . . .
H4_5 H 0.656026 0.833120 0.413134 0.099 Uiso 1 1 calc R U . . .
C5_5 C 0.6394(4) 0.7389(3) 0.44573(18) 0.0600(16) Uani 1 1 d D . . . .
H5A_5 H 0.621714 0.705338 0.441715 0.072 Uiso 1 1 calc R U . . .
H5B_5 H 0.594585 0.757870 0.455812 0.072 Uiso 1 1 calc R U . . .
C6_5 C 0.7047(3) 0.7401(2) 0.47442(17) 0.0500(13) Uani 1 1 d D . . . .
C7_5 C 0.7868(4) 0.7150(3) 0.4690(2) 0.0645(17) Uani 1 1 d D . . . .
H7_5 H 0.803977 0.697159 0.444950 0.077 Uiso 1 1 calc R U . . .
C8_5 C 0.8274(4) 0.7597(3) 0.4861(2) 0.077(2) Uani 1 1 d D . . . .
H8_5 H 0.875407 0.775214 0.475047 0.092 Uiso 1 1 calc R U . . .
C9_5 C 0.7467(5) 0.7850(3) 0.4916(2) 0.0753(19) Uani 1 1 d D . . . .
H9_5 H 0.734852 0.819153 0.484326 0.090 Uiso 1 1 calc R U . . .
C1_6 C 0.7693(7) 0.7039(8) 0.6874(3) 0.192(9) Uani 1 1 d D . . . .
H1A_6 H 0.784406 0.678420 0.705886 0.288 Uiso 1 1 calc R U . . .
H1B_6 H 0.712643 0.702321 0.682480 0.288 Uiso 1 1 calc R U . . .
H1C_6 H 0.782531 0.735353 0.698765 0.288 Uiso 1 1 calc R U . . .
N1_6 N 0.8120(5) 0.6974(4) 0.6500(2) 0.113(3) Uani 1 1 d D . . . .
C2_6 C 0.8234(5) 0.7326(4) 0.6237(2) 0.099(3) Uani 1 1 d D . . . .
H2_6 H 0.806085 0.764964 0.626119 0.119 Uiso 1 1 calc R U . . .
N2_6 N 0.8638(4) 0.7142(3) 0.59298(18) 0.090(2) Uani 1 1 d D . . . .
C3_6 C 0.8453(5) 0.6559(4) 0.6351(3) 0.105(3) Uani 1 1 d D . . . .
H3_6 H 0.845588 0.625363 0.647630 0.126 Uiso 1 1 calc R U . . .
C4_6 C 0.8775(5) 0.6660(4) 0.5996(2) 0.098(3) Uani 1 1 d D . . . .
H4_6 H 0.904191 0.644280 0.582791 0.118 Uiso 1 1 calc R U . . .
C5_6 C 0.8860(5) 0.7391(4) 0.5572(2) 0.095(3) Uani 1 1 d D . . . .
H5A_6 H 0.932694 0.723339 0.545704 0.114 Uiso 1 1 calc R U . . .
H5B_6 H 0.899974 0.772822 0.563477 0.114 Uiso 1 1 calc R U . . .
C6_6 C 0.8205(4) 0.7384(3) 0.52826(19) 0.0686(18) Uani 1 1 d D . . . .
C7_6 C 0.7787(4) 0.6927(3) 0.5112(2) 0.0726(18) Uani 1 1 d D . . . .
H7_6 H 0.790701 0.658597 0.518538 0.087 Uiso 1 1 calc R U . . .
C8_6 C 0.6982(4) 0.7186(3) 0.5173(2) 0.0696(19) Uani 1 1 d D . . . .
H8_6 H 0.650132 0.703389 0.528573 0.084 Uiso 1 1 calc R U . . .
C9_6 C 0.7402(4) 0.7632(3) 0.5343(2) 0.080(2) Uani 1 1 d D . . . .
H9_6 H 0.724017 0.781223 0.558332 0.096 Uiso 1 1 calc R U . . .
 
loop_
 _atom_site_aniso_label
 _atom_site_aniso_U_11
 _atom_site_aniso_U_22
 _atom_site_aniso_U_33
 _atom_site_aniso_U_23
 _atom_site_aniso_U_13
 _atom_site_aniso_U_12
I1 0.0696(3) 0.0620(3) 0.0554(3) 0.02157(19) -0.0004(2) -0.0116(2)
I2A 0.0505(6) 0.0524(4) 0.0351(3) -0.0040(2) 0.0113(3) -0.0048(4)
I2B 0.0700(19) 0.0623(11) 0.0456(9) 0.0028(7) 0.0086(10) -0.0111(11)
I3A 0.1059(11) 0.0825(8) 0.0835(8) 0.0271(6) -0.0092(7) -0.0353(7)
I3B 0.127(2) 0.1015(17) 0.1086(17) 0.0464(12) -0.0232(13) -0.0565(14)
I3C 0.176(4) 0.125(3) 0.124(3) 0.018(2) -0.010(2) -0.011(2)
I4A 0.0675(19) 0.078(2) 0.096(2) -0.0245(16) 0.0068(15) 0.0046(14)
I4B 0.119(3) 0.082(2) 0.120(3) -0.0151(18) 0.059(2) -0.0260(18)
I4C 0.083(4) 0.095(4) 0.074(4) 0.004(3) 0.001(3) -0.013(3)
I4D 0.188(6) 0.158(5) 0.217(6) 0.042(4) 0.006(4) -0.002(4)
I4E 0.384(9) 0.362(9) 0.381(9) -0.046(5) -0.001(6) -0.004(5)
O1_1 0.124(5) 0.077(3) 0.068(3) 0.011(3) 0.057(3) 0.017(3)
O2_1 0.114(5) 0.106(4) 0.080(4) 0.043(3) 0.067(4) 0.042(4)
O3_1 0.074(3) 0.120(4) 0.038(2) -0.001(2) 0.011(2) 0.050(3)
O4_1 0.094(4) 0.141(6) 0.079(4) 0.022(4) 0.046(3) 0.066(4)
O5_1 0.053(3) 0.076(3) 0.076(3) -0.010(3) -0.005(2) 0.003(2)
O6_1 0.093(3) 0.107(4) 0.065(3) -0.035(3) -0.016(3) 0.051(3)
O7_1 0.070(3) 0.068(3) 0.107(5) 0.001(3) 0.009(3) -0.004(3)
O8_1 0.089(4) 0.081(4) 0.076(4) -0.028(3) -0.012(3) 0.030(3)
O9_1 0.0365(18) 0.070(3) 0.051(2) 0.019(2) 0.0102(16) 0.0039(18)
O10_1 0.062(3) 0.083(3) 0.040(2) -0.002(2) 0.0133(19) 0.021(2)
O11_1 0.056(2) 0.073(3) 0.055(3) -0.007(2) 0.016(2) 0.002(2)
O12_1 0.038(2) 0.101(4) 0.053(2) -0.010(2) 0.0154(18) -0.009(2)
O13_1 0.119(4) 0.055(3) 0.114(5) -0.026(3) 0.066(4) -0.017(3)
O14_1 0.087(4) 0.087(4) 0.108(5) 0.001(3) 0.058(4) -0.015(3)
N1_1 0.137(6) 0.055(4) 0.107(5) 0.007(3) 0.070(4) 0.014(4)
N2_1 0.116(5) 0.087(4) 0.067(4) 0.023(3) 0.059(3) 0.035(4)
N3_1 0.123(5) 0.078(4) 0.092(5) 0.036(3) 0.061(4) 0.011(4)
N4_1 0.112(5) 0.103(5) 0.072(4) 0.023(3) 0.049(3) 0.047(4)
N5_1 0.075(4) 0.111(4) 0.043(3) 0.006(3) 0.016(3) 0.054(3)
N6_1 0.064(3) 0.125(4) 0.038(3) -0.010(3) 0.001(2) 0.043(3)
N7_1 0.084(4) 0.122(5) 0.051(3) 0.020(4) 0.029(3) 0.049(3)
N8_1 0.074(4) 0.120(4) 0.042(3) -0.002(3) 0.011(3) 0.050(3)
N9_1 0.071(4) 0.110(5) 0.068(3) -0.029(3) -0.022(3) 0.039(4)
N10_1 0.066(4) 0.073(4) 0.094(4) -0.035(3) -0.018(3) 0.007(3)
N11_1 0.092(4) 0.105(5) 0.064(4) -0.033(3) -0.016(3) 0.047(4)
N12_1 0.081(4) 0.090(4) 0.097(5) -0.045(3) -0.027(3) 0.027(3)
N13_1 0.068(4) 0.057(3) 0.112(5) -0.006(3) -0.005(3) -0.001(3)
N14_1 0.074(4) 0.048(3) 0.113(5) -0.001(3) 0.004(3) -0.005(3)
N15_1 0.090(4) 0.066(4) 0.098(4) -0.035(3) -0.026(3) 0.020(3)
N16_1 0.075(3) 0.068(4) 0.086(4) 0.000(3) -0.011(3) 0.024(3)
N17_1 0.055(3) 0.069(3) 0.056(3) 0.016(2) 0.012(2) 0.015(2)
N18_1 0.037(2) 0.084(3) 0.032(2) 0.007(2) 0.0072(17) 0.014(2)
N19_1 0.062(3) 0.067(3) 0.056(3) 0.005(2) 0.011(2) 0.021(2)
N20_1 0.042(2) 0.081(3) 0.035(2) 0.002(2) 0.0063(18) 0.015(2)
N21_1 0.036(2) 0.090(3) 0.045(3) -0.013(2) 0.0055(19) -0.003(2)
N22_1 0.063(3) 0.073(3) 0.095(5) -0.032(3) 0.036(3) -0.019(3)
N23_1 0.042(3) 0.103(4) 0.042(3) -0.020(3) 0.012(2) -0.010(3)
N24_1 0.047(3) 0.095(4) 0.082(4) -0.024(3) 0.023(3) -0.026(3)
N25_1 0.111(5) 0.061(4) 0.106(5) -0.026(3) 0.058(4) -0.027(3)
N26_1 0.124(5) 0.055(4) 0.115(5) -0.005(3) 0.071(4) -0.008(4)
N27_1 0.091(4) 0.056(3) 0.117(5) -0.009(3) 0.046(4) -0.025(3)
N28_1 0.109(5) 0.068(4) 0.112(5) 0.004(3) 0.067(4) -0.015(3)
C1_1 0.126(6) 0.063(4) 0.079(4) 0.019(3) 0.065(4) 0.019(4)
C2_1 0.108(5) 0.091(5) 0.070(4) 0.032(4) 0.057(4) 0.026(4)
C3_1 0.130(6) 0.058(4) 0.123(6) 0.037(4) 0.081(5) 0.024(4)
C4_1 0.128(6) 0.090(6) 0.088(5) 0.040(4) 0.070(4) 0.042(5)
C5_1 0.103(5) 0.114(5) 0.061(5) 0.022(4) 0.042(4) 0.051(4)
C6_1 0.101(6) 0.125(6) 0.057(4) 0.021(4) 0.048(4) 0.047(4)
C7_1 0.067(4) 0.118(5) 0.032(3) 0.005(3) 0.005(3) 0.049(4)
C8_1 0.083(4) 0.120(5) 0.034(3) 0.013(4) 0.015(3) 0.052(4)
C9_1 0.077(4) 0.140(6) 0.032(3) 0.012(4) 0.015(3) 0.055(4)
C10_1 0.070(4) 0.134(5) 0.040(3) -0.013(4) -0.004(3) 0.051(4)
C11_1 0.061(4) 0.123(6) 0.063(4) -0.012(4) -0.008(3) 0.034(4)
C12_1 0.106(6) 0.139(6) 0.056(4) -0.033(4) 0.002(4) 0.069(5)
C13_1 0.060(4) 0.083(4) 0.074(4) -0.025(3) -0.019(3) 0.009(3)
C14_1 0.080(4) 0.095(5) 0.074(5) -0.049(3) -0.024(3) 0.044(4)
C15_1 0.077(4) 0.120(6) 0.085(5) -0.045(4) -0.026(4) 0.036(4)
C16_1 0.082(5) 0.092(5) 0.103(5) -0.048(4) -0.027(4) 0.016(4)
C17_1 0.071(5) 0.067(5) 0.129(6) -0.016(4) -0.016(4) -0.016(4)
C18_1 0.108(7) 0.085(5) 0.104(5) -0.052(4) -0.028(5) 0.037(5)
C19_1 0.062(4) 0.049(4) 0.114(5) 0.001(4) -0.001(4) -0.007(3)
C20_1 0.081(4) 0.049(4) 0.087(4) -0.021(3) -0.018(3) 0.034(3)
C21_1 0.090(5) 0.044(4) 0.138(6) -0.018(4) -0.015(4) 0.003(3)
C22_1 0.089(5) 0.044(3) 0.123(6) -0.003(4) -0.003(4) 0.005(3)
C23_1 0.072(4) 0.059(4) 0.106(5) 0.025(4) 0.017(4) 0.004(3)
C24_1 0.084(5) 0.068(4) 0.082(5) -0.009(4) -0.007(4) 0.032(4)
C25_1 0.043(2) 0.066(3) 0.035(3) 0.014(2) 0.009(2) 0.010(2)
C26_1 0.051(3) 0.074(4) 0.035(3) 0.008(2) 0.005(2) 0.031(3)
C27_1 0.061(3) 0.072(4) 0.055(3) 0.018(3) 0.008(3) 0.025(3)
C28_1 0.044(3) 0.091(4) 0.035(3) 0.017(3) 0.009(2) 0.024(3)
C29_1 0.037(3) 0.094(4) 0.035(3) -0.003(3) 0.007(2) 0.008(3)
C30_1 0.042(3) 0.112(4) 0.038(3) -0.005(3) 0.005(2) 0.015(3)
C31_1 0.052(3) 0.074(4) 0.051(3) -0.018(3) 0.018(3) -0.009(3)
C32_1 0.041(3) 0.092(4) 0.055(3) -0.024(3) 0.013(2) -0.020(3)
C33_1 0.036(3) 0.108(5) 0.052(3) -0.030(3) 0.007(2) -0.012(3)
C34_1 0.052(3) 0.096(4) 0.083(5) -0.048(4) 0.022(3) -0.030(3)
C35_1 0.105(6) 0.070(4) 0.106(5) -0.037(4) 0.050(5) -0.016(4)
C36_1 0.072(4) 0.091(5) 0.113(6) -0.031(4) 0.037(4) -0.045(4)
C37_1 0.124(5) 0.043(3) 0.108(6) -0.025(3) 0.062(4) -0.018(4)
C38_1 0.088(5) 0.068(4) 0.111(5) 0.001(4) 0.054(4) -0.027(3)
C39_1 0.105(5) 0.064(4) 0.130(6) -0.024(4) 0.054(5) -0.036(4)
C40_1 0.117(6) 0.054(4) 0.134(6) -0.007(4) 0.060(5) -0.029(4)
C41_1 0.121(6) 0.057(4) 0.136(7) -0.002(4) 0.066(5) -0.003(4)
C42_1 0.133(6) 0.069(5) 0.108(6) 0.022(4) 0.065(5) -0.010(5)
O1_2 0.068(3) 0.124(5) 0.056(3) 0.039(3) 0.008(2) -0.023(3)
O2_2 0.060(2) 0.065(3) 0.046(2) 0.0012(19) 0.0164(18) -0.010(2)
O3_2 0.060(3) 0.113(4) 0.046(2) 0.018(3) -0.005(2) -0.016(3)
O4_2 0.053(2) 0.071(3) 0.040(2) 0.0109(19) 0.0046(17) -0.005(2)
O5_2 0.079(3) 0.094(4) 0.049(3) 0.001(2) -0.006(2) -0.038(3)
O6_2 0.057(3) 0.078(3) 0.067(3) 0.004(2) -0.001(2) -0.004(2)
O7_2 0.122(5) 0.110(5) 0.058(3) -0.029(3) 0.022(3) -0.059(4)
O8_2 0.074(4) 0.105(5) 0.108(5) 0.011(4) 0.024(3) 0.024(3)
O9_2 0.092(4) 0.128(5) 0.056(3) -0.032(3) 0.025(3) -0.058(4)
O10_2 0.083(4) 0.111(5) 0.081(3) 0.004(3) 0.040(3) 0.025(3)
O11_2 0.063(3) 0.126(5) 0.048(3) -0.004(3) -0.007(2) -0.035(3)
O12_2 0.043(2) 0.076(3) 0.0344(19) -0.0016(18) 0.0052(16) -0.0095(19)
O13_2 0.083(4) 0.135(5) 0.063(3) 0.038(3) -0.001(3) -0.036(4)
O14_2 0.059(2) 0.059(2) 0.038(2) 0.0007(17) 0.0089(17) -0.0149(19)
N1_2 0.059(3) 0.093(4) 0.073(3) 0.045(3) 0.010(3) -0.018(3)
N2_2 0.056(3) 0.073(3) 0.054(3) 0.018(2) 0.014(2) -0.008(2)
N3_2 0.057(3) 0.068(3) 0.058(3) 0.013(3) 0.019(2) -0.014(2)
N4_2 0.045(2) 0.068(3) 0.060(3) 0.020(3) 0.020(2) -0.011(2)
N5_2 0.045(2) 0.073(3) 0.045(3) 0.017(2) 0.008(2) -0.008(2)
N6_2 0.054(3) 0.082(3) 0.037(2) 0.005(2) -0.002(2) -0.011(3)
N7_2 0.049(3) 0.065(3) 0.044(3) 0.010(2) 0.009(2) -0.010(2)
N8_2 0.044(2) 0.071(3) 0.036(2) 0.009(2) 0.0052(18) -0.002(2)
N9_2 0.064(3) 0.085(4) 0.044(3) 0.002(2) 0.006(2) -0.021(3)
N10_2 0.088(4) 0.073(4) 0.050(3) -0.011(3) 0.017(3) -0.025(3)
N11_2 0.048(2) 0.074(3) 0.049(3) -0.004(2) 0.006(2) -0.013(2)
N12_2 0.072(3) 0.070(4) 0.068(3) -0.002(3) 0.021(3) -0.015(3)
N13_2 0.107(4) 0.085(4) 0.072(4) -0.030(3) 0.035(3) -0.036(3)
N14_2 0.120(5) 0.104(5) 0.068(4) -0.032(3) 0.050(4) -0.037(4)
N15_2 0.100(5) 0.085(5) 0.090(4) -0.010(4) 0.048(4) -0.008(4)
N16_2 0.100(5) 0.073(4) 0.117(5) -0.007(4) 0.048(4) -0.002(4)
N17_2 0.108(5) 0.096(4) 0.075(4) -0.045(3) 0.051(3) -0.034(4)
N18_2 0.075(3) 0.099(4) 0.053(3) -0.021(3) 0.033(3) -0.030(3)
N19_2 0.083(4) 0.092(4) 0.100(5) -0.015(4) 0.053(4) -0.007(4)
N20_2 0.073(4) 0.084(4) 0.058(3) -0.017(3) 0.035(3) 0.010(3)
N21_2 0.061(3) 0.092(4) 0.034(2) -0.015(2) 0.010(2) -0.032(3)
N22_2 0.059(3) 0.070(3) 0.033(2) 0.008(2) 0.005(2) -0.030(2)
N23_2 0.052(3) 0.084(3) 0.035(2) -0.009(2) 0.016(2) -0.014(2)
N24_2 0.050(3) 0.062(3) 0.029(2) -0.0016(18) 0.0038(18) -0.017(2)
N25_2 0.062(3) 0.070(3) 0.050(3) 0.015(2) 0.011(2) -0.022(3)
N26_2 0.052(3) 0.099(5) 0.066(3) 0.034(3) 0.012(2) -0.011(3)
N27_2 0.050(2) 0.051(3) 0.040(2) 0.0018(19) 0.0101(19) -0.014(2)
N28_2 0.060(3) 0.060(3) 0.053(3) 0.010(2) 0.023(2) -0.008(2)
C1_2 0.055(4) 0.092(5) 0.060(3) 0.031(3) 0.011(3) -0.011(3)
C2_2 0.050(3) 0.051(3) 0.046(3) -0.001(2) 0.022(2) -0.005(2)
C3_2 0.059(3) 0.068(4) 0.071(4) 0.022(3) 0.015(3) -0.005(3)
C4_2 0.057(3) 0.063(4) 0.059(3) 0.016(3) 0.020(3) -0.001(3)
C5_2 0.046(3) 0.083(4) 0.054(4) 0.022(3) 0.009(3) 0.001(3)
C6_2 0.060(4) 0.069(3) 0.041(3) 0.010(2) 0.021(3) -0.015(3)
C7_2 0.037(3) 0.091(4) 0.041(3) 0.010(3) 0.002(2) -0.009(3)
C8_2 0.049(3) 0.069(3) 0.027(2) 0.013(2) 0.013(2) -0.005(2)
C9_2 0.038(3) 0.071(3) 0.043(3) 0.014(2) 0.008(2) -0.009(2)
C10_2 0.039(3) 0.074(3) 0.038(3) 0.010(2) 0.006(2) -0.008(3)
C11_2 0.054(3) 0.089(4) 0.057(4) -0.002(3) -0.005(3) -0.019(3)
C12_2 0.059(3) 0.069(3) 0.042(3) 0.012(3) 0.004(3) -0.004(3)
C13_2 0.077(4) 0.075(4) 0.044(3) -0.008(3) 0.004(3) -0.041(3)
C14_2 0.053(3) 0.054(3) 0.061(3) 0.005(3) 0.010(2) -0.011(3)
C15_2 0.060(3) 0.070(4) 0.054(3) -0.001(3) 0.006(3) -0.021(3)
C16_2 0.086(4) 0.059(4) 0.064(4) -0.007(3) 0.023(3) -0.027(3)
C17_2 0.106(5) 0.084(5) 0.064(4) -0.028(4) 0.031(4) -0.032(4)
C18_2 0.094(5) 0.083(5) 0.104(7) 0.005(5) 0.049(5) 0.005(4)
C19_2 0.122(6) 0.097(6) 0.055(4) -0.033(3) 0.037(4) -0.038(4)
C20_2 0.075(5) 0.074(5) 0.111(5) -0.001(5) 0.035(4) 0.014(4)
C21_2 0.104(5) 0.076(5) 0.102(5) -0.024(4) 0.046(4) -0.011(4)
C22_2 0.118(6) 0.091(6) 0.111(6) -0.020(4) 0.067(5) -0.015(5)
C23_2 0.142(8) 0.110(6) 0.079(5) -0.047(5) 0.066(6) -0.061(6)
C24_2 0.092(5) 0.093(5) 0.135(9) -0.009(5) 0.056(6) 0.010(5)
C25_2 0.088(5) 0.103(5) 0.057(4) -0.036(4) 0.040(3) -0.044(4)
C26_2 0.081(5) 0.091(5) 0.081(4) -0.014(4) 0.042(4) 0.019(4)
C27_2 0.090(5) 0.105(5) 0.086(5) -0.040(4) 0.057(4) -0.018(4)
C28_2 0.076(4) 0.101(5) 0.065(4) -0.027(4) 0.042(3) -0.008(4)
C29_2 0.090(5) 0.107(5) 0.034(3) -0.017(3) 0.031(3) -0.046(4)
C30_2 0.054(4) 0.108(5) 0.055(4) -0.016(4) 0.025(3) -0.001(3)
C31_2 0.054(3) 0.090(4) 0.034(3) -0.001(3) 0.010(2) -0.040(3)
C32_2 0.035(2) 0.072(3) 0.032(2) -0.010(2) 0.0089(19) -0.018(2)
C33_2 0.052(3) 0.091(4) 0.032(3) -0.002(3) 0.009(2) -0.025(3)
C34_2 0.057(3) 0.073(3) 0.030(2) 0.002(2) 0.007(2) -0.033(3)
C35_2 0.066(4) 0.071(4) 0.046(3) 0.015(3) 0.011(3) -0.028(3)
C36_2 0.053(3) 0.065(3) 0.032(3) -0.008(2) 0.005(2) -0.017(3)
C37_2 0.055(3) 0.088(5) 0.064(3) 0.028(4) 0.012(3) -0.019(3)
C38_2 0.050(3) 0.059(3) 0.034(3) -0.002(2) 0.007(2) -0.020(2)
C39_2 0.058(3) 0.046(3) 0.054(3) 0.004(2) 0.015(2) -0.014(2)
C40_2 0.061(3) 0.052(3) 0.070(4) 0.016(3) 0.023(3) -0.009(3)
C41_2 0.049(3) 0.107(6) 0.094(6) 0.058(5) 0.017(3) -0.013(4)
C42_2 0.056(3) 0.073(4) 0.049(3) 0.003(3) 0.018(3) -0.013(3)
C1_3 0.053(3) 0.104(6) 0.052(4) 0.013(4) 0.015(3) 0.026(4)
N1_3 0.049(2) 0.070(3) 0.039(2) 0.012(2) 0.0199(19) 0.015(2)
C2_3 0.044(3) 0.060(3) 0.033(3) 0.002(2) 0.017(2) -0.001(2)
N2_3 0.043(2) 0.045(2) 0.031(2) 0.0040(17) 0.0177(17) 0.0013(18)
C3_3 0.064(3) 0.051(3) 0.045(3) 0.006(2) 0.027(2) 0.011(2)
C4_3 0.053(3) 0.053(3) 0.041(3) 0.000(2) 0.020(2) 0.000(2)
C5_3 0.058(3) 0.047(3) 0.044(3) 0.013(2) 0.021(2) 0.010(2)
C6_3 0.051(3) 0.043(3) 0.035(2) 0.005(2) 0.015(2) 0.007(2)
C7_3 0.048(3) 0.073(4) 0.038(3) 0.001(3) 0.011(2) 0.006(3)
C8_3 0.057(3) 0.063(3) 0.054(3) 0.025(3) 0.030(3) 0.020(3)
C9_3 0.053(3) 0.049(3) 0.056(3) -0.005(3) 0.023(3) 0.000(2)
C1_4 0.047(3) 0.155(9) 0.056(4) -0.026(5) 0.008(3) 0.023(4)
N1_4 0.050(3) 0.098(4) 0.039(3) -0.005(3) 0.016(2) 0.012(3)
C2_4 0.058(3) 0.089(4) 0.049(3) -0.010(3) 0.025(3) 0.006(3)
N2_4 0.051(3) 0.077(3) 0.037(2) 0.006(2) 0.021(2) 0.010(2)
C3_4 0.066(4) 0.076(4) 0.045(3) -0.001(3) 0.010(3) 0.019(3)
C4_4 0.057(3) 0.082(4) 0.042(3) -0.003(3) 0.012(3) 0.017(3)
C5_4 0.056(3) 0.088(5) 0.044(3) 0.017(3) 0.025(3) 0.015(3)
C6_4 0.052(3) 0.056(3) 0.037(3) 0.007(2) 0.019(2) 0.007(2)
C7_4 0.056(3) 0.057(3) 0.047(3) -0.009(3) 0.018(3) 0.002(3)
C8_4 0.056(3) 0.057(3) 0.044(3) 0.014(3) 0.018(2) 0.016(3)
C9_4 0.049(3) 0.072(4) 0.036(3) -0.001(3) 0.016(2) 0.005(3)
C1_5 0.084(6) 0.200(11) 0.046(4) 0.003(5) 0.006(4) -0.032(7)
N1_5 0.059(3) 0.118(5) 0.047(3) 0.010(3) -0.006(2) -0.036(3)
C2_5 0.041(3) 0.086(4) 0.047(3) 0.001(3) -0.001(2) -0.013(3)
N2_5 0.044(3) 0.070(3) 0.053(3) 0.002(2) 0.003(2) -0.015(2)
C3_5 0.089(6) 0.095(5) 0.073(5) 0.024(4) -0.014(4) -0.035(5)
C4_5 0.091(6) 0.075(4) 0.081(5) 0.005(4) -0.012(4) -0.023(4)
C5_5 0.047(3) 0.081(4) 0.052(3) -0.004(3) 0.011(2) -0.018(3)
C6_5 0.045(3) 0.062(3) 0.044(3) -0.005(2) 0.012(2) -0.023(2)
C7_5 0.054(3) 0.094(5) 0.046(3) -0.011(3) 0.008(3) 0.003(3)
C8_5 0.055(3) 0.119(6) 0.057(4) 0.019(4) 0.003(3) -0.039(4)
C9_5 0.086(5) 0.073(4) 0.068(4) -0.013(3) 0.004(4) -0.032(3)
C1_6 0.092(8) 0.40(3) 0.088(7) 0.061(11) 0.007(6) 0.018(12)
N1_6 0.092(6) 0.197(9) 0.052(4) 0.016(4) -0.011(3) -0.059(6)
C2_6 0.080(5) 0.162(7) 0.055(4) 0.004(4) -0.012(4) -0.049(5)
N2_6 0.073(4) 0.142(6) 0.055(3) 0.009(3) -0.013(3) -0.064(4)
C3_6 0.074(5) 0.174(8) 0.066(5) 0.041(5) -0.016(4) -0.062(6)
C4_6 0.073(5) 0.152(6) 0.069(5) 0.018(5) -0.019(4) -0.058(5)
C5_6 0.086(5) 0.142(8) 0.058(4) 0.018(4) -0.014(4) -0.069(6)
C6_6 0.059(3) 0.102(5) 0.045(3) -0.005(3) 0.007(3) -0.042(3)
C7_6 0.083(4) 0.074(4) 0.060(4) -0.001(3) -0.018(3) -0.027(3)
C8_6 0.063(4) 0.099(5) 0.047(3) -0.007(3) 0.014(3) -0.041(3)
C9_6 0.078(4) 0.107(6) 0.056(4) -0.027(4) 0.014(3) -0.032(4)
 
_geom_special_details
;
 All esds (except the esd in the dihedral angle between two l.s. planes)
 are estimated using the full covariance matrix.  The cell esds are taken
 into account individually in the estimation of esds in distances, angles
 and torsion angles; correlations between esds in cell parameters are only
 used when they are defined by crystal symmetry.  An approximate (isotropic)
 treatment of cell esds is used for estimating esds involving l.s. planes.
;
 
loop_
 _geom_bond_atom_site_label_1
 _geom_bond_atom_site_label_2
 _geom_bond_distance
 _geom_bond_site_symmetry_2
 _geom_bond_publ_flag
I2A I2B 0.651(5) . ?
I2B I4C 2.834(9) . ?
I3A I3B 1.107(4) . ?
I3A I3C 2.796(9) . ?
I3B I3C 1.691(10) . ?
O1_1 C1_1 1.217(9) . ?
O2_1 C2_1 1.192(10) . ?
O3_1 C7_1 1.219(8) . ?
O4_1 C8_1 1.307(10) . ?
O5_1 C13_1 1.224(9) . ?
O6_1 C14_1 1.222(12) . ?
O7_1 C19_1 1.218(10) . ?
O8_1 C20_1 1.233(11) . ?
O9_1 C25_1 1.204(7) . ?
O10_1 C26_1 1.243(7) . ?
O11_1 C31_1 1.246(8) . ?
O12_1 C32_1 1.236(8) . ?
O13_1 C37_1 1.235(11) . ?
O14_1 C38_1 1.188(11) . ?
N1_1 C1_1 1.364(14) . ?
N1_1 C41_1 1.402(15) . ?
N1_1 C3_1 1.497(11) . ?
N2_1 C5_1 1.380(14) . ?
N2_1 C1_1 1.400(13) . ?
N2_1 C4_1 1.460(11) . ?
N3_1 C42_1 1.365(15) . ?
N3_1 C2_1 1.391(14) . ?
N3_1 C3_1 1.531(13) . ?
N4_1 C2_1 1.369(14) . ?
N4_1 C6_1 1.443(14) . ?
N4_1 C4_1 1.464(11) . ?
N5_1 C7_1 1.346(12) . ?
N5_1 C5_1 1.422(12) . ?
N5_1 C9_1 1.474(9) . ?
N6_1 C11_1 1.402(12) . ?
N6_1 C7_1 1.405(11) . ?
N6_1 C10_1 1.447(10) . ?
N7_1 C8_1 1.339(11) . ?
N7_1 C6_1 1.387(13) . ?
N7_1 C9_1 1.400(11) . ?
N8_1 C8_1 1.302(12) . ?
N8_1 C12_1 1.422(12) . ?
N8_1 C10_1 1.472(9) . ?
N9_1 C13_1 1.316(12) . ?
N9_1 C11_1 1.454(11) . ?
N9_1 C15_1 1.476(10) . ?
N10_1 C13_1 1.394(11) . ?
N10_1 C16_1 1.422(12) . ?
N10_1 C17_1 1.447(13) . ?
N11_1 C14_1 1.363(10) . ?
N11_1 C12_1 1.418(13) . ?
N11_1 C15_1 1.454(14) . ?
N12_1 C14_1 1.406(14) . ?
N12_1 C18_1 1.449(12) . ?
N12_1 C16_1 1.467(12) . ?
N13_1 C19_1 1.342(12) . ?
N13_1 C17_1 1.442(11) . ?
N13_1 C21_1 1.452(11) . ?
N14_1 C19_1 1.363(11) . ?
N14_1 C22_1 1.438(12) . ?
N14_1 C23_1 1.459(12) . ?
N15_1 C20_1 1.365(11) . ?
N15_1 C18_1 1.406(12) . ?
N15_1 C21_1 1.470(14) . ?
N16_1 C20_1 1.362(11) . ?
N16_1 C22_1 1.436(12) . ?
N16_1 C24_1 1.458(10) . ?
N17_1 C25_1 1.359(9) . ?
N17_1 C23_1 1.418(10) . ?
N17_1 C27_1 1.450(9) . ?
N18_1 C25_1 1.384(8) . ?
N18_1 C29_1 1.429(9) . ?
N18_1 C28_1 1.446(8) . ?
N19_1 C26_1 1.368(10) . ?
N19_1 C24_1 1.443(10) . ?
N19_1 C27_1 1.449(9) . ?
N20_1 C26_1 1.358(8) . ?
N20_1 C30_1 1.436(10) . ?
N20_1 C28_1 1.453(8) . ?
N21_1 C31_1 1.374(10) . ?
N21_1 C29_1 1.450(9) . ?
N21_1 C33_1 1.460(8) . ?
N22_1 C31_1 1.361(9) . ?
N22_1 C35_1 1.441(12) . ?
N22_1 C34_1 1.482(10) . ?
N23_1 C32_1 1.355(10) . ?
N23_1 C30_1 1.442(10) . ?
N23_1 C33_1 1.453(8) . ?
N24_1 C32_1 1.373(10) . ?
N24_1 C34_1 1.450(9) . ?
N24_1 C36_1 1.493(12) . ?
N25_1 C37_1 1.365(14) . ?
N25_1 C35_1 1.409(14) . ?
N25_1 C39_1 1.447(11) . ?
N26_1 C37_1 1.393(13) . ?
N26_1 C40_1 1.425(13) . ?
N26_1 C41_1 1.456(15) . ?
N27_1 C38_1 1.386(13) . ?
N27_1 C36_1 1.416(13) . ?
N27_1 C39_1 1.473(12) . ?
N28_1 C38_1 1.388(13) . ?
N28_1 C40_1 1.437(12) . ?
N28_1 C42_1 1.487(14) . ?
C3_1 C4_1 1.509(17) . ?
C3_1 H3_1 1.0000 . ?
C4_1 H4_1 1.0000 . ?
C5_1 H5A_1 0.9900 . ?
C5_1 H5B_1 0.9900 . ?
C6_1 H6A_1 0.9900 . ?
C6_1 H6B_1 0.9900 . ?
C9_1 C10_1 1.547(14) . ?
C9_1 H9_1 1.0000 . ?
C10_1 H10_1 1.0000 . ?
C11_1 H11A_1 0.9900 . ?
C11_1 H11B_1 0.9900 . ?
C12_1 H12A_1 0.9900 . ?
C12_1 H12B_1 0.9900 . ?
C15_1 C16_1 1.569(15) . ?
C15_1 H15_1 1.0000 . ?
C16_1 H16_1 1.0000 . ?
C17_1 H17A_1 0.9900 . ?
C17_1 H17B_1 0.9900 . ?
C18_1 H18A_1 0.9900 . ?
C18_1 H18B_1 0.9900 . ?
C21_1 C22_1 1.513(14) . ?
C21_1 H21_1 1.0000 . ?
C22_1 H22_1 1.0000 . ?
C23_1 H23A_1 0.9900 . ?
C23_1 H23B_1 0.9900 . ?
C24_1 H24A_1 0.9900 . ?
C24_1 H24B_1 0.9900 . ?
C27_1 C28_1 1.506(11) . ?
C27_1 H27_1 1.0000 . ?
C28_1 H28_1 1.0000 . ?
C29_1 H29A_1 0.9900 . ?
C29_1 H29B_1 0.9900 . ?
C30_1 H30A_1 0.9900 . ?
C30_1 H30B_1 0.9900 . ?
C33_1 C34_1 1.539(13) . ?
C33_1 H33_1 1.0000 . ?
C34_1 H34_1 1.0000 . ?
C35_1 H35A_1 0.9900 . ?
C35_1 H35B_1 0.9900 . ?
C36_1 H36A_1 0.9900 . ?
C36_1 H36B_1 0.9900 . ?
C39_1 C40_1 1.607(17) . ?
C39_1 H39_1 1.0000 . ?
C40_1 H40_1 1.0000 . ?
C41_1 H41A_1 0.9900 . ?
C41_1 H41B_1 0.9900 . ?
C42_1 H42A_1 0.9900 . ?
C42_1 H42B_1 0.9900 . ?
O1_2 C1_2 1.225(9) . ?
O2_2 C2_2 1.235(8) . ?
O3_2 C7_2 1.230(8) . ?
O4_2 C8_2 1.217(7) . ?
O5_2 C13_2 1.239(9) . ?
O6_2 C14_2 1.212(8) . ?
O7_2 C19_2 1.251(13) . ?
O8_2 C20_2 1.204(13) . ?
O9_2 C25_2 1.196(12) . ?
O10_2 C26_2 1.206(11) . ?
O11_2 C31_2 1.211(8) . ?
O12_2 C32_2 1.219(7) . ?
O13_2 C37_2 1.207(10) . ?
O14_2 C38_2 1.227(7) . ?
N1_2 C1_2 1.397(11) . ?
N1_2 C3_2 1.432(10) . ?
N1_2 C41_2 1.446(8) . ?
N2_2 C1_2 1.355(8) . ?
N2_2 C4_2 1.430(9) . ?
N2_2 C5_2 1.435(9) . ?
N3_2 C2_2 1.381(8) . ?
N3_2 C42_2 1.436(9) . ?
N3_2 C3_2 1.450(10) . ?
N4_2 C2_2 1.369(8) . ?
N4_2 C4_2 1.436(9) . ?
N4_2 C6_2 1.462(7) . ?
N5_2 C7_2 1.328(9) . ?
N5_2 C5_2 1.458(9) . ?
N5_2 C9_2 1.470(7) . ?
N6_2 C7_2 1.374(9) . ?
N6_2 C11_2 1.441(10) . ?
N6_2 C10_2 1.452(8) . ?
N7_2 C8_2 1.365(8) . ?
N7_2 C6_2 1.417(9) . ?
N7_2 C9_2 1.446(8) . ?
N8_2 C8_2 1.373(8) . ?
N8_2 C12_2 1.432(9) . ?
N8_2 C10_2 1.463(8) . ?
N9_2 C13_2 1.376(9) . ?
N9_2 C15_2 1.432(10) . ?
N9_2 C11_2 1.440(10) . ?
N10_2 C13_2 1.373(11) . ?
N10_2 C16_2 1.419(10) . ?
N10_2 C17_2 1.450(10) . ?
N11_2 C14_2 1.328(9) . ?
N11_2 C12_2 1.454(9) . ?
N11_2 C15_2 1.463(9) . ?
N12_2 C14_2 1.394(9) . ?
N12_2 C16_2 1.416(11) . ?
N12_2 C18_2 1.437(11) . ?
N13_2 C19_2 1.341(12) . ?
N13_2 C17_2 1.429(12) . ?
N13_2 C21_2 1.456(14) . ?
N14_2 C19_2 1.329(14) . ?
N14_2 C22_2 1.449(15) . ?
N14_2 C23_2 1.465(11) . ?
N15_2 C20_2 1.354(13) . ?
N15_2 C21_2 1.438(13) . ?
N15_2 C18_2 1.473(11) . ?
N16_2 C20_2 1.374(13) . ?
N16_2 C22_2 1.414(15) . ?
N16_2 C24_2 1.448(13) . ?
N17_2 C25_2 1.368(14) . ?
N17_2 C27_2 1.432(14) . ?
N17_2 C23_2 1.473(11) . ?
N18_2 C25_2 1.362(10) . ?
N18_2 C28_2 1.451(12) . ?
N18_2 C29_2 1.461(11) . ?
N19_2 C26_2 1.370(12) . ?
N19_2 C24_2 1.431(13) . ?
N19_2 C27_2 1.450(12) . ?
N20_2 C26_2 1.377(12) . ?
N20_2 C30_2 1.422(10) . ?
N20_2 C28_2 1.425(10) . ?
N21_2 C31_2 1.339(10) . ?
N21_2 C29_2 1.447(9) . ?
N21_2 C33_2 1.469(8) . ?
N22_2 C31_2 1.380(8) . ?
N22_2 C34_2 1.436(8) . ?
N22_2 C35_2 1.452(10) . ?
N23_2 C32_2 1.376(7) . ?
N23_2 C33_2 1.425(9) . ?
N23_2 C30_2 1.430(10) . ?
N24_2 C32_2 1.368(8) . ?
N24_2 C36_2 1.454(8) . ?
N24_2 C34_2 1.460(7) . ?
N25_2 C37_2 1.372(9) . ?
N25_2 C39_2 1.440(9) . ?
N25_2 C35_2 1.447(8) . ?
N26_2 C37_2 1.371(10) . ?
N26_2 C40_2 1.414(10) . ?
N26_2 C41_2 1.465(9) . ?
N27_2 C38_2 1.366(7) . ?
N27_2 C36_2 1.423(8) . ?
N27_2 C39_2 1.446(8) . ?
N28_2 C38_2 1.373(9) . ?
N28_2 C42_2 1.443(8) . ?
N28_2 C40_2 1.457(8) . ?
C3_2 C4_2 1.547(9) . ?
C3_2 H3_2 1.0000 . ?
C4_2 H4_2 1.0000 . ?
C5_2 H5A_2 0.9900 . ?
C5_2 H5B_2 0.9900 . ?
C6_2 H6A_2 0.9900 . ?
C6_2 H6B_2 0.9900 . ?
C9_2 C10_2 1.544(10) . ?
C9_2 H9_2 1.0000 . ?
C10_2 H10_2 1.0000 . ?
C11_2 H11A_2 0.9900 . ?
C11_2 H11B_2 0.9900 . ?
C12_2 H12A_2 0.9900 . ?
C12_2 H12B_2 0.9900 . ?
C15_2 C16_2 1.564(11) . ?
C15_2 H15_2 1.0000 . ?
C16_2 H16_2 1.0000 . ?
C17_2 H17A_2 0.9900 . ?
C17_2 H17B_2 0.9900 . ?
C18_2 H18A_2 0.9900 . ?
C18_2 H18B_2 0.9900 . ?
C21_2 C22_2 1.540(13) . ?
C21_2 H21_2 1.0000 . ?
C22_2 H22_2 1.0000 . ?
C23_2 H23A_2 0.9900 . ?
C23_2 H23B_2 0.9900 . ?
C24_2 H24A_2 0.9900 . ?
C24_2 H24B_2 0.9900 . ?
C27_2 C28_2 1.533(13) . ?
C27_2 H27_2 1.0000 . ?
C28_2 H28_2 1.0000 . ?
C29_2 H29A_2 0.9900 . ?
C29_2 H29B_2 0.9900 . ?
C30_2 H30A_2 0.9900 . ?
C30_2 H30B_2 0.9900 . ?
C33_2 C34_2 1.537(10) . ?
C33_2 H33_2 1.0000 . ?
C34_2 H34_2 1.0000 . ?
C35_2 H35A_2 0.9900 . ?
C35_2 H35B_2 0.9900 . ?
C36_2 H36A_2 0.9900 . ?
C36_2 H36B_2 0.9900 . ?
C39_2 C40_2 1.544(9) . ?
C39_2 H39_2 1.0000 . ?
C40_2 H40_2 1.0000 . ?
C41_2 H41A_2 0.9900 . ?
C41_2 H41B_2 0.9900 . ?
C42_2 H42A_2 0.9900 . ?
C42_2 H42B_2 0.9900 . ?
C1_3 N1_3 1.457(7) . ?
C1_3 H1A_3 0.9800 . ?
C1_3 H1B_3 0.9800 . ?
C1_3 H1C_3 0.9800 . ?
N1_3 C2_3 1.316(7) . ?
N1_3 C3_3 1.378(8) . ?
C2_3 N2_3 1.340(7) . ?
C2_3 H2_3 0.9500 . ?
N2_3 C4_3 1.373(7) . ?
N2_3 C5_3 1.465(6) . ?
C3_3 C4_3 1.338(8) . ?
C3_3 H3_3 0.9500 . ?
C4_3 H4_3 0.9500 . ?
C5_3 C6_3 1.481(7) . ?
C5_3 H5A_3 0.9900 . ?
C5_3 H5B_3 0.9900 . ?
C6_3 C7_3 1.557(7) . ?
C6_3 C9_3 1.557(7) . ?
C6_3 C8_4 1.568(8) . ?
C7_3 C8_3 1.545(8) . ?
C7_3 C7_4 1.550(9) . ?
C7_3 H7_3 1.0000 . ?
C8_3 C9_3 1.548(8) . ?
C8_3 C6_4 1.564(8) . ?
C8_3 H8_3 1.0000 . ?
C9_3 C9_4 1.570(9) . ?
C9_3 H9_3 1.0000 . ?
C1_4 N1_4 1.474(8) . ?
C1_4 H1A_4 0.9800 . ?
C1_4 H1B_4 0.9800 . ?
C1_4 H1C_4 0.9800 . ?
N1_4 C2_4 1.336(8) . ?
N1_4 C3_4 1.347(8) . ?
C2_4 N2_4 1.346(8) . ?
C2_4 H2_4 0.9500 . ?
N2_4 C4_4 1.369(8) . ?
N2_4 C5_4 1.461(7) . ?
C3_4 C4_4 1.345(8) . ?
C3_4 H3_4 0.9500 . ?
C4_4 H4_4 0.9500 . ?
C5_4 C6_4 1.488(7) . ?
C5_4 H5A_4 0.9900 . ?
C5_4 H5B_4 0.9900 . ?
C6_4 C7_4 1.548(8) . ?
C6_4 C9_4 1.555(7) . ?
C7_4 C8_4 1.559(8) . ?
C7_4 H7_4 1.0000 . ?
C8_4 C9_4 1.547(8) . ?
C8_4 H8_4 1.0000 . ?
C9_4 H9_4 1.0000 . ?
C1_5 N1_5 1.468(9) . ?
C1_5 H1A_5 0.9800 . ?
C1_5 H1B_5 0.9800 . ?
C1_5 H1C_5 0.9800 . ?
N1_5 C2_5 1.312(8) . ?
N1_5 C3_5 1.371(10) . ?
C2_5 N2_5 1.336(8) . ?
C2_5 H2_5 0.9500 . ?
N2_5 C4_5 1.355(9) . ?
N2_5 C5_5 1.470(7) . ?
C3_5 C4_5 1.344(10) . ?
C3_5 H3_5 0.9500 . ?
C4_5 H4_5 0.9500 . ?
C5_5 C6_5 1.477(8) . ?
C5_5 H5A_5 0.9900 . ?
C5_5 H5B_5 0.9900 . ?
C6_5 C9_5 1.552(8) . ?
C6_5 C7_5 1.575(8) . ?
C6_5 C8_6 1.579(9) . ?
C7_5 C8_5 1.534(9) . ?
C7_5 C7_6 1.571(11) . ?
C7_5 H7_5 1.0000 . ?
C8_5 C9_5 1.556(10) . ?
C8_5 C6_6 1.557(10) . ?
C8_5 H8_5 1.0000 . ?
C9_5 C9_6 1.578(12) . ?
C9_5 H9_5 1.0000 . ?
C1_6 N1_6 1.481(11) . ?
C1_6 H1A_6 0.9800 . ?
C1_6 H1B_6 0.9800 . ?
C1_6 H1C_6 0.9800 . ?
N1_6 C2_6 1.340(10) . ?
N1_6 C3_6 1.382(12) . ?
C2_6 N2_6 1.353(10) . ?
C2_6 H2_6 0.9500 . ?
N2_6 C4_6 1.377(11) . ?
N2_6 C5_6 1.450(9) . ?
C3_6 C4_6 1.357(10) . ?
C3_6 H3_6 0.9500 . ?
C4_6 H4_6 0.9500 . ?
C5_6 C6_6 1.486(9) . ?
C5_6 H5A_6 0.9900 . ?
C5_6 H5B_6 0.9900 . ?
C6_6 C9_6 1.546(10) . ?
C6_6 C7_6 1.566(8) . ?
C7_6 C8_6 1.564(10) . ?
C7_6 H7_6 1.0000 . ?
C8_6 C9_6 1.541(9) . ?
C8_6 H8_6 1.0000 . ?
C9_6 H9_6 1.0000 . ?
 
loop_
 _geom_angle_atom_site_label_1
 _geom_angle_atom_site_label_2
 _geom_angle_atom_site_label_3
 _geom_angle
 _geom_angle_site_symmetry_1
 _geom_angle_site_symmetry_3
 _geom_angle_publ_flag
I2A I2B I4C 166.1(3) . . ?
I3B I3A I3C 2.44(17) . . ?
I3A I3B I3C 176.0(3) . . ?
I3B I3C I3A 1.59(11) . . ?
C1_1 N1_1 C41_1 125.2(8) . . ?
C1_1 N1_1 C3_1 108.2(9) . . ?
C41_1 N1_1 C3_1 125.5(9) . . ?
C5_1 N2_1 C1_1 124.3(7) . . ?
C5_1 N2_1 C4_1 125.0(9) . . ?
C1_1 N2_1 C4_1 110.4(10) . . ?
C42_1 N3_1 C2_1 123.6(9) . . ?
C42_1 N3_1 C3_1 125.0(10) . . ?
C2_1 N3_1 C3_1 108.6(10) . . ?
C2_1 N4_1 C6_1 123.7(7) . . ?
C2_1 N4_1 C4_1 113.0(10) . . ?
C6_1 N4_1 C4_1 121.9(9) . . ?
C7_1 N5_1 C5_1 120.7(6) . . ?
C7_1 N5_1 C9_1 112.2(8) . . ?
C5_1 N5_1 C9_1 123.0(7) . . ?
C11_1 N6_1 C7_1 124.1(7) . . ?
C11_1 N6_1 C10_1 126.2(8) . . ?
C7_1 N6_1 C10_1 109.4(8) . . ?
C8_1 N7_1 C6_1 125.9(8) . . ?
C8_1 N7_1 C9_1 112.6(9) . . ?
C6_1 N7_1 C9_1 121.1(8) . . ?
C8_1 N8_1 C12_1 121.2(7) . . ?
C8_1 N8_1 C10_1 108.7(8) . . ?
C12_1 N8_1 C10_1 122.3(9) . . ?
C13_1 N9_1 C11_1 123.4(7) . . ?
C13_1 N9_1 C15_1 114.0(8) . . ?
C11_1 N9_1 C15_1 119.6(7) . . ?
C13_1 N10_1 C16_1 110.4(8) . . ?
C13_1 N10_1 C17_1 122.3(8) . . ?
C16_1 N10_1 C17_1 123.4(8) . . ?
C14_1 N11_1 C12_1 121.6(9) . . ?
C14_1 N11_1 C15_1 113.0(9) . . ?
C12_1 N11_1 C15_1 121.5(8) . . ?
C14_1 N12_1 C18_1 119.2(8) . . ?
C14_1 N12_1 C16_1 113.7(8) . . ?
C18_1 N12_1 C16_1 126.0(10) . . ?
C19_1 N13_1 C17_1 119.5(8) . . ?
C19_1 N13_1 C21_1 113.6(8) . . ?
C17_1 N13_1 C21_1 123.0(8) . . ?
C19_1 N14_1 C22_1 111.9(8) . . ?
C19_1 N14_1 C23_1 123.0(8) . . ?
C22_1 N14_1 C23_1 124.9(7) . . ?
C20_1 N15_1 C18_1 122.4(9) . . ?
C20_1 N15_1 C21_1 111.7(8) . . ?
C18_1 N15_1 C21_1 125.3(8) . . ?
C20_1 N16_1 C22_1 114.8(8) . . ?
C20_1 N16_1 C24_1 119.1(8) . . ?
C22_1 N16_1 C24_1 123.1(8) . . ?
C25_1 N17_1 C23_1 122.2(6) . . ?
C25_1 N17_1 C27_1 113.3(6) . . ?
C23_1 N17_1 C27_1 124.2(6) . . ?
C25_1 N18_1 C29_1 120.6(5) . . ?
C25_1 N18_1 C28_1 111.4(6) . . ?
C29_1 N18_1 C28_1 123.3(5) . . ?
C26_1 N19_1 C24_1 121.4(6) . . ?
C26_1 N19_1 C27_1 110.1(6) . . ?
C24_1 N19_1 C27_1 124.9(7) . . ?
C26_1 N20_1 C30_1 123.7(5) . . ?
C26_1 N20_1 C28_1 111.0(6) . . ?
C30_1 N20_1 C28_1 124.2(5) . . ?
C31_1 N21_1 C29_1 122.3(5) . . ?
C31_1 N21_1 C33_1 112.4(6) . . ?
C29_1 N21_1 C33_1 122.6(6) . . ?
C31_1 N22_1 C35_1 123.9(7) . . ?
C31_1 N22_1 C34_1 110.1(7) . . ?
C35_1 N22_1 C34_1 123.6(7) . . ?
C32_1 N23_1 C30_1 122.6(6) . . ?
C32_1 N23_1 C33_1 111.8(7) . . ?
C30_1 N23_1 C33_1 125.1(6) . . ?
C32_1 N24_1 C34_1 111.7(7) . . ?
C32_1 N24_1 C36_1 123.9(6) . . ?
C34_1 N24_1 C36_1 123.3(7) . . ?
C37_1 N25_1 C35_1 121.4(8) . . ?
C37_1 N25_1 C39_1 110.6(9) . . ?
C35_1 N25_1 C39_1 125.4(10) . . ?
C37_1 N26_1 C40_1 112.8(10) . . ?
C37_1 N26_1 C41_1 124.7(9) . . ?
C40_1 N26_1 C41_1 121.1(8) . . ?
C38_1 N27_1 C36_1 123.0(8) . . ?
C38_1 N27_1 C39_1 112.8(9) . . ?
C36_1 N27_1 C39_1 120.6(9) . . ?
C38_1 N28_1 C40_1 114.7(10) . . ?
C38_1 N28_1 C42_1 123.1(8) . . ?
C40_1 N28_1 C42_1 119.2(9) . . ?
O1_1 C1_1 N1_1 123.1(10) . . ?
O1_1 C1_1 N2_1 125.7(11) . . ?
N1_1 C1_1 N2_1 111.2(7) . . ?
O2_1 C2_1 N4_1 126.7(11) . . ?
O2_1 C2_1 N3_1 124.1(11) . . ?
N4_1 C2_1 N3_1 109.1(8) . . ?
N1_1 C3_1 C4_1 106.2(8) . . ?
N1_1 C3_1 N3_1 110.7(8) . . ?
C4_1 C3_1 N3_1 104.4(8) . . ?
N1_1 C3_1 H3_1 111.7 . . ?
C4_1 C3_1 H3_1 111.7 . . ?
N3_1 C3_1 H3_1 111.7 . . ?
N2_1 C4_1 N4_1 115.2(8) . . ?
N2_1 C4_1 C3_1 104.0(8) . . ?
N4_1 C4_1 C3_1 104.1(9) . . ?
N2_1 C4_1 H4_1 111.0 . . ?
N4_1 C4_1 H4_1 111.0 . . ?
C3_1 C4_1 H4_1 111.0 . . ?
N2_1 C5_1 N5_1 114.9(7) . . ?
N2_1 C5_1 H5A_1 108.5 . . ?
N5_1 C5_1 H5A_1 108.5 . . ?
N2_1 C5_1 H5B_1 108.5 . . ?
N5_1 C5_1 H5B_1 108.5 . . ?
H5A_1 C5_1 H5B_1 107.5 . . ?
N7_1 C6_1 N4_1 117.7(7) . . ?
N7_1 C6_1 H6A_1 107.9 . . ?
N4_1 C6_1 H6A_1 107.9 . . ?
N7_1 C6_1 H6B_1 107.9 . . ?
N4_1 C6_1 H6B_1 107.9 . . ?
H6A_1 C6_1 H6B_1 107.2 . . ?
O3_1 C7_1 N5_1 126.6(8) . . ?
O3_1 C7_1 N6_1 123.3(9) . . ?
N5_1 C7_1 N6_1 109.9(6) . . ?
N8_1 C8_1 O4_1 126.3(8) . . ?
N8_1 C8_1 N7_1 112.0(7) . . ?
O4_1 C8_1 N7_1 121.6(10) . . ?
N7_1 C9_1 N5_1 117.2(7) . . ?
N7_1 C9_1 C10_1 101.8(7) . . ?
N5_1 C9_1 C10_1 102.0(7) . . ?
N7_1 C9_1 H9_1 111.6 . . ?
N5_1 C9_1 H9_1 111.6 . . ?
C10_1 C9_1 H9_1 111.6 . . ?
N6_1 C10_1 N8_1 113.2(6) . . ?
N6_1 C10_1 C9_1 105.6(6) . . ?
N8_1 C10_1 C9_1 103.3(8) . . ?
N6_1 C10_1 H10_1 111.4 . . ?
N8_1 C10_1 H10_1 111.4 . . ?
C9_1 C10_1 H10_1 111.4 . . ?
N6_1 C11_1 N9_1 113.0(7) . . ?
N6_1 C11_1 H11A_1 109.0 . . ?
N9_1 C11_1 H11A_1 109.0 . . ?
N6_1 C11_1 H11B_1 109.0 . . ?
N9_1 C11_1 H11B_1 109.0 . . ?
H11A_1 C11_1 H11B_1 107.8 . . ?
N11_1 C12_1 N8_1 112.3(6) . . ?
N11_1 C12_1 H12A_1 109.1 . . ?
N8_1 C12_1 H12A_1 109.1 . . ?
N11_1 C12_1 H12B_1 109.1 . . ?
N8_1 C12_1 H12B_1 109.1 . . ?
H12A_1 C12_1 H12B_1 107.9 . . ?
O5_1 C13_1 N9_1 126.9(8) . . ?
O5_1 C13_1 N10_1 123.7(9) . . ?
N9_1 C13_1 N10_1 109.5(7) . . ?
O6_1 C14_1 N11_1 126.4(11) . . ?
O6_1 C14_1 N12_1 126.7(8) . . ?
N11_1 C14_1 N12_1 106.9(9) . . ?
N11_1 C15_1 N9_1 113.0(8) . . ?
N11_1 C15_1 C16_1 104.6(7) . . ?
N9_1 C15_1 C16_1 100.1(8) . . ?
N11_1 C15_1 H15_1 112.7 . . ?
N9_1 C15_1 H15_1 112.7 . . ?
C16_1 C15_1 H15_1 112.7 . . ?
N10_1 C16_1 N12_1 113.9(7) . . ?
N10_1 C16_1 C15_1 105.6(7) . . ?
N12_1 C16_1 C15_1 101.1(9) . . ?
N10_1 C16_1 H16_1 111.9 . . ?
N12_1 C16_1 H16_1 111.9 . . ?
C15_1 C16_1 H16_1 111.9 . . ?
N13_1 C17_1 N10_1 111.6(7) . . ?
N13_1 C17_1 H17A_1 109.3 . . ?
N10_1 C17_1 H17A_1 109.3 . . ?
N13_1 C17_1 H17B_1 109.3 . . ?
N10_1 C17_1 H17B_1 109.3 . . ?
H17A_1 C17_1 H17B_1 108.0 . . ?
N15_1 C18_1 N12_1 112.1(7) . . ?
N15_1 C18_1 H18A_1 109.2 . . ?
N12_1 C18_1 H18A_1 109.2 . . ?
N15_1 C18_1 H18B_1 109.2 . . ?
N12_1 C18_1 H18B_1 109.2 . . ?
H18A_1 C18_1 H18B_1 107.9 . . ?
O7_1 C19_1 N13_1 127.2(8) . . ?
O7_1 C19_1 N14_1 125.4(9) . . ?
N13_1 C19_1 N14_1 107.4(8) . . ?
O8_1 C20_1 N16_1 128.6(8) . . ?
O8_1 C20_1 N15_1 124.9(9) . . ?
N16_1 C20_1 N15_1 106.4(9) . . ?
N13_1 C21_1 N15_1 116.5(8) . . ?
N13_1 C21_1 C22_1 101.8(8) . . ?
N15_1 C21_1 C22_1 104.3(8) . . ?
N13_1 C21_1 H21_1 111.2 . . ?
N15_1 C21_1 H21_1 111.2 . . ?
C22_1 C21_1 H21_1 111.2 . . ?
N16_1 C22_1 N14_1 116.0(7) . . ?
N16_1 C22_1 C21_1 102.2(8) . . ?
N14_1 C22_1 C21_1 104.7(7) . . ?
N16_1 C22_1 H22_1 111.1 . . ?
N14_1 C22_1 H22_1 111.1 . . ?
C21_1 C22_1 H22_1 111.1 . . ?
N17_1 C23_1 N14_1 112.5(6) . . ?
N17_1 C23_1 H23A_1 109.1 . . ?
N14_1 C23_1 H23A_1 109.1 . . ?
N17_1 C23_1 H23B_1 109.1 . . ?
N14_1 C23_1 H23B_1 109.1 . . ?
H23A_1 C23_1 H23B_1 107.8 . . ?
N19_1 C24_1 N16_1 111.2(6) . . ?
N19_1 C24_1 H24A_1 109.4 . . ?
N16_1 C24_1 H24A_1 109.4 . . ?
N19_1 C24_1 H24B_1 109.4 . . ?
N16_1 C24_1 H24B_1 109.4 . . ?
H24A_1 C24_1 H24B_1 108.0 . . ?
O9_1 C25_1 N17_1 126.5(6) . . ?
O9_1 C25_1 N18_1 126.6(6) . . ?
N17_1 C25_1 N18_1 106.9(5) . . ?
O10_1 C26_1 N20_1 124.6(7) . . ?
O10_1 C26_1 N19_1 126.0(6) . . ?
N20_1 C26_1 N19_1 109.5(5) . . ?
N19_1 C27_1 N17_1 114.3(6) . . ?
N19_1 C27_1 C28_1 104.5(6) . . ?
N17_1 C27_1 C28_1 102.9(5) . . ?
N19_1 C27_1 H27_1 111.5 . . ?
N17_1 C27_1 H27_1 111.5 . . ?
C28_1 C27_1 H27_1 111.5 . . ?
N18_1 C28_1 N20_1 114.0(5) . . ?
N18_1 C28_1 C27_1 104.5(5) . . ?
N20_1 C28_1 C27_1 103.8(5) . . ?
N18_1 C28_1 H28_1 111.3 . . ?
N20_1 C28_1 H28_1 111.3 . . ?
C27_1 C28_1 H28_1 111.3 . . ?
N18_1 C29_1 N21_1 112.9(5) . . ?
N18_1 C29_1 H29A_1 109.0 . . ?
N21_1 C29_1 H29A_1 109.0 . . ?
N18_1 C29_1 H29B_1 109.0 . . ?
N21_1 C29_1 H29B_1 109.0 . . ?
H29A_1 C29_1 H29B_1 107.8 . . ?
N20_1 C30_1 N23_1 114.4(5) . . ?
N20_1 C30_1 H30A_1 108.7 . . ?
N23_1 C30_1 H30A_1 108.7 . . ?
N20_1 C30_1 H30B_1 108.7 . . ?
N23_1 C30_1 H30B_1 108.7 . . ?
H30A_1 C30_1 H30B_1 107.6 . . ?
O11_1 C31_1 N22_1 124.4(7) . . ?
O11_1 C31_1 N21_1 125.7(6) . . ?
N22_1 C31_1 N21_1 109.9(6) . . ?
O12_1 C32_1 N23_1 125.8(8) . . ?
O12_1 C32_1 N24_1 125.1(7) . . ?
N23_1 C32_1 N24_1 109.1(6) . . ?
N23_1 C33_1 N21_1 115.0(5) . . ?
N23_1 C33_1 C34_1 103.9(6) . . ?
N21_1 C33_1 C34_1 102.5(6) . . ?
N23_1 C33_1 H33_1 111.6 . . ?
N21_1 C33_1 H33_1 111.6 . . ?
C34_1 C33_1 H33_1 111.6 . . ?
N24_1 C34_1 N22_1 113.7(7) . . ?
N24_1 C34_1 C33_1 103.3(6) . . ?
N22_1 C34_1 C33_1 104.9(6) . . ?
N24_1 C34_1 H34_1 111.5 . . ?
N22_1 C34_1 H34_1 111.5 . . ?
C33_1 C34_1 H34_1 111.5 . . ?
N25_1 C35_1 N22_1 113.4(7) . . ?
N25_1 C35_1 H35A_1 108.9 . . ?
N22_1 C35_1 H35A_1 108.9 . . ?
N25_1 C35_1 H35B_1 108.9 . . ?
N22_1 C35_1 H35B_1 108.9 . . ?
H35A_1 C35_1 H35B_1 107.7 . . ?
N27_1 C36_1 N24_1 114.6(6) . . ?
N27_1 C36_1 H36A_1 108.6 . . ?
N24_1 C36_1 H36A_1 108.6 . . ?
N27_1 C36_1 H36B_1 108.6 . . ?
N24_1 C36_1 H36B_1 108.6 . . ?
H36A_1 C36_1 H36B_1 107.6 . . ?
O13_1 C37_1 N25_1 127.4(10) . . ?
O13_1 C37_1 N26_1 122.8(12) . . ?
N25_1 C37_1 N26_1 109.8(8) . . ?
O14_1 C38_1 N27_1 126.0(11) . . ?
O14_1 C38_1 N28_1 126.8(11) . . ?
N27_1 C38_1 N28_1 107.2(8) . . ?
N25_1 C39_1 N27_1 113.1(7) . . ?
N25_1 C39_1 C40_1 104.2(9) . . ?
N27_1 C39_1 C40_1 102.5(8) . . ?
N25_1 C39_1 H39_1 112.1 . . ?
N27_1 C39_1 H39_1 112.1 . . ?
C40_1 C39_1 H39_1 112.1 . . ?
N26_1 C40_1 N28_1 116.7(9) . . ?
N26_1 C40_1 C39_1 101.8(8) . . ?
N28_1 C40_1 C39_1 102.2(8) . . ?
N26_1 C40_1 H40_1 111.8 . . ?
N28_1 C40_1 H40_1 111.8 . . ?
C39_1 C40_1 H40_1 111.8 . . ?
N1_1 C41_1 N26_1 115.7(8) . . ?
N1_1 C41_1 H41A_1 108.4 . . ?
N26_1 C41_1 H41A_1 108.4 . . ?
N1_1 C41_1 H41B_1 108.4 . . ?
N26_1 C41_1 H41B_1 108.4 . . ?
H41A_1 C41_1 H41B_1 107.4 . . ?
N3_1 C42_1 N28_1 116.2(7) . . ?
N3_1 C42_1 H42A_1 108.2 . . ?
N28_1 C42_1 H42A_1 108.2 . . ?
N3_1 C42_1 H42B_1 108.2 . . ?
N28_1 C42_1 H42B_1 108.2 . . ?
H42A_1 C42_1 H42B_1 107.4 . . ?
C1_2 N1_2 C3_2 112.7(5) . . ?
C1_2 N1_2 C41_2 121.8(7) . . ?
C3_2 N1_2 C41_2 123.1(8) . . ?
C1_2 N2_2 C4_2 113.3(6) . . ?
C1_2 N2_2 C5_2 121.2(6) . . ?
C4_2 N2_2 C5_2 121.9(5) . . ?
C2_2 N3_2 C42_2 122.1(6) . . ?
C2_2 N3_2 C3_2 112.7(5) . . ?
C42_2 N3_2 C3_2 123.7(6) . . ?
C2_2 N4_2 C4_2 113.5(5) . . ?
C2_2 N4_2 C6_2 121.1(6) . . ?
C4_2 N4_2 C6_2 123.5(5) . . ?
C7_2 N5_2 C5_2 121.6(5) . . ?
C7_2 N5_2 C9_2 113.3(5) . . ?
C5_2 N5_2 C9_2 121.9(6) . . ?
C7_2 N6_2 C11_2 123.9(6) . . ?
C7_2 N6_2 C10_2 112.1(6) . . ?
C11_2 N6_2 C10_2 124.0(6) . . ?
C8_2 N7_2 C6_2 122.0(5) . . ?
C8_2 N7_2 C9_2 112.9(5) . . ?
C6_2 N7_2 C9_2 124.7(6) . . ?
C8_2 N8_2 C12_2 120.3(5) . . ?
C8_2 N8_2 C10_2 111.3(5) . . ?
C12_2 N8_2 C10_2 123.0(5) . . ?
C13_2 N9_2 C15_2 111.1(7) . . ?
C13_2 N9_2 C11_2 124.8(7) . . ?
C15_2 N9_2 C11_2 123.0(6) . . ?
C13_2 N10_2 C16_2 111.6(6) . . ?
C13_2 N10_2 C17_2 122.8(7) . . ?
C16_2 N10_2 C17_2 121.5(8) . . ?
C14_2 N11_2 C12_2 123.0(6) . . ?
C14_2 N11_2 C15_2 112.6(6) . . ?
C12_2 N11_2 C15_2 122.6(5) . . ?
C14_2 N12_2 C16_2 112.4(6) . . ?
C14_2 N12_2 C18_2 124.3(8) . . ?
C16_2 N12_2 C18_2 122.4(7) . . ?
C19_2 N13_2 C17_2 124.3(10) . . ?
C19_2 N13_2 C21_2 111.6(9) . . ?
C17_2 N13_2 C21_2 122.0(8) . . ?
C19_2 N14_2 C22_2 111.1(8) . . ?
C19_2 N14_2 C23_2 123.3(11) . . ?
C22_2 N14_2 C23_2 122.8(10) . . ?
C20_2 N15_2 C21_2 114.4(8) . . ?
C20_2 N15_2 C18_2 124.2(9) . . ?
C21_2 N15_2 C18_2 119.4(8) . . ?
C20_2 N16_2 C22_2 113.0(9) . . ?
C20_2 N16_2 C24_2 122.1(11) . . ?
C22_2 N16_2 C24_2 123.2(9) . . ?
C25_2 N17_2 C27_2 113.9(8) . . ?
C25_2 N17_2 C23_2 122.2(10) . . ?
C27_2 N17_2 C23_2 123.8(10) . . ?
C25_2 N18_2 C28_2 112.6(8) . . ?
C25_2 N18_2 C29_2 119.8(8) . . ?
C28_2 N18_2 C29_2 124.5(7) . . ?
C26_2 N19_2 C24_2 121.4(10) . . ?
C26_2 N19_2 C27_2 111.6(8) . . ?
C24_2 N19_2 C27_2 120.6(8) . . ?
C26_2 N20_2 C30_2 122.7(7) . . ?
C26_2 N20_2 C28_2 111.4(7) . . ?
C30_2 N20_2 C28_2 125.5(7) . . ?
C31_2 N21_2 C29_2 122.8(6) . . ?
C31_2 N21_2 C33_2 111.9(6) . . ?
C29_2 N21_2 C33_2 122.6(7) . . ?
C31_2 N22_2 C34_2 110.9(6) . . ?
C31_2 N22_2 C35_2 124.4(6) . . ?
C34_2 N22_2 C35_2 123.9(5) . . ?
C32_2 N23_2 C33_2 113.1(6) . . ?
C32_2 N23_2 C30_2 120.8(6) . . ?
C33_2 N23_2 C30_2 125.1(5) . . ?
C32_2 N24_2 C36_2 122.1(5) . . ?
C32_2 N24_2 C34_2 111.9(5) . . ?
C36_2 N24_2 C34_2 123.5(5) . . ?
C37_2 N25_2 C39_2 113.6(6) . . ?
C37_2 N25_2 C35_2 122.2(6) . . ?
C39_2 N25_2 C35_2 123.7(5) . . ?
C37_2 N26_2 C40_2 112.2(6) . . ?
C37_2 N26_2 C41_2 121.0(7) . . ?
C40_2 N26_2 C41_2 123.6(7) . . ?
C38_2 N27_2 C36_2 122.2(5) . . ?
C38_2 N27_2 C39_2 112.1(5) . . ?
C36_2 N27_2 C39_2 121.9(5) . . ?
C38_2 N28_2 C42_2 122.9(6) . . ?
C38_2 N28_2 C40_2 112.6(5) . . ?
C42_2 N28_2 C40_2 124.0(6) . . ?
O1_2 C1_2 N2_2 127.0(8) . . ?
O1_2 C1_2 N1_2 125.9(6) . . ?
N2_2 C1_2 N1_2 107.0(7) . . ?
O2_2 C2_2 N4_2 127.2(6) . . ?
O2_2 C2_2 N3_2 125.9(6) . . ?
N4_2 C2_2 N3_2 106.9(6) . . ?
N1_2 C3_2 N3_2 114.3(6) . . ?
N1_2 C3_2 C4_2 103.0(6) . . ?
N3_2 C3_2 C4_2 103.0(5) . . ?
N1_2 C3_2 H3_2 111.9 . . ?
N3_2 C3_2 H3_2 111.9 . . ?
C4_2 C3_2 H3_2 111.9 . . ?
N2_2 C4_2 N4_2 115.1(6) . . ?
N2_2 C4_2 C3_2 103.9(5) . . ?
N4_2 C4_2 C3_2 103.5(6) . . ?
N2_2 C4_2 H4_2 111.3 . . ?
N4_2 C4_2 H4_2 111.3 . . ?
C3_2 C4_2 H4_2 111.3 . . ?
N2_2 C5_2 N5_2 113.0(5) . . ?
N2_2 C5_2 H5A_2 109.0 . . ?
N5_2 C5_2 H5A_2 109.0 . . ?
N2_2 C5_2 H5B_2 109.0 . . ?
N5_2 C5_2 H5B_2 109.0 . . ?
H5A_2 C5_2 H5B_2 107.8 . . ?
N7_2 C6_2 N4_2 113.9(5) . . ?
N7_2 C6_2 H6A_2 108.8 . . ?
N4_2 C6_2 H6A_2 108.8 . . ?
N7_2 C6_2 H6B_2 108.8 . . ?
N4_2 C6_2 H6B_2 108.8 . . ?
H6A_2 C6_2 H6B_2 107.7 . . ?
O3_2 C7_2 N5_2 127.0(7) . . ?
O3_2 C7_2 N6_2 124.5(7) . . ?
N5_2 C7_2 N6_2 108.5(5) . . ?
O4_2 C8_2 N7_2 125.4(6) . . ?
O4_2 C8_2 N8_2 126.3(6) . . ?
N7_2 C8_2 N8_2 108.3(5) . . ?
N7_2 C9_2 N5_2 115.5(5) . . ?
N7_2 C9_2 C10_2 103.1(5) . . ?
N5_2 C9_2 C10_2 102.0(5) . . ?
N7_2 C9_2 H9_2 111.9 . . ?
N5_2 C9_2 H9_2 111.9 . . ?
C10_2 C9_2 H9_2 111.9 . . ?
N6_2 C10_2 N8_2 114.7(5) . . ?
N6_2 C10_2 C9_2 103.2(5) . . ?
N8_2 C10_2 C9_2 103.3(5) . . ?
N6_2 C10_2 H10_2 111.7 . . ?
N8_2 C10_2 H10_2 111.7 . . ?
C9_2 C10_2 H10_2 111.7 . . ?
N9_2 C11_2 N6_2 114.0(5) . . ?
N9_2 C11_2 H11A_2 108.8 . . ?
N6_2 C11_2 H11A_2 108.8 . . ?
N9_2 C11_2 H11B_2 108.8 . . ?
N6_2 C11_2 H11B_2 108.8 . . ?
H11A_2 C11_2 H11B_2 107.6 . . ?
N8_2 C12_2 N11_2 113.2(5) . . ?
N8_2 C12_2 H12A_2 108.9 . . ?
N11_2 C12_2 H12A_2 108.9 . . ?
N8_2 C12_2 H12B_2 108.9 . . ?
N11_2 C12_2 H12B_2 108.9 . . ?
H12A_2 C12_2 H12B_2 107.7 . . ?
O5_2 C13_2 N10_2 126.5(7) . . ?
O5_2 C13_2 N9_2 124.0(8) . . ?
N10_2 C13_2 N9_2 109.5(7) . . ?
O6_2 C14_2 N11_2 127.0(7) . . ?
O6_2 C14_2 N12_2 124.3(7) . . ?
N11_2 C14_2 N12_2 108.6(6) . . ?
N9_2 C15_2 N11_2 115.1(6) . . ?
N9_2 C15_2 C16_2 103.6(6) . . ?
N11_2 C15_2 C16_2 102.3(6) . . ?
N9_2 C15_2 H15_2 111.7 . . ?
N11_2 C15_2 H15_2 111.7 . . ?
C16_2 C15_2 H15_2 111.7 . . ?
N12_2 C16_2 N10_2 114.8(6) . . ?
N12_2 C16_2 C15_2 103.4(6) . . ?
N10_2 C16_2 C15_2 103.8(7) . . ?
N12_2 C16_2 H16_2 111.4 . . ?
N10_2 C16_2 H16_2 111.4 . . ?
C15_2 C16_2 H16_2 111.4 . . ?
N13_2 C17_2 N10_2 113.3(7) . . ?
N13_2 C17_2 H17A_2 108.9 . . ?
N10_2 C17_2 H17A_2 108.9 . . ?
N13_2 C17_2 H17B_2 108.9 . . ?
N10_2 C17_2 H17B_2 108.9 . . ?
H17A_2 C17_2 H17B_2 107.7 . . ?
N12_2 C18_2 N15_2 114.6(8) . . ?
N12_2 C18_2 H18A_2 108.6 . . ?
N15_2 C18_2 H18A_2 108.6 . . ?
N12_2 C18_2 H18B_2 108.6 . . ?
N15_2 C18_2 H18B_2 108.6 . . ?
H18A_2 C18_2 H18B_2 107.6 . . ?
O7_2 C19_2 N14_2 124.3(9) . . ?
O7_2 C19_2 N13_2 124.7(11) . . ?
N14_2 C19_2 N13_2 110.9(11) . . ?
O8_2 C20_2 N15_2 126.1(9) . . ?
O8_2 C20_2 N16_2 127.6(10) . . ?
N15_2 C20_2 N16_2 106.2(10) . . ?
N15_2 C21_2 N13_2 113.3(7) . . ?
N15_2 C21_2 C22_2 101.6(9) . . ?
N13_2 C21_2 C22_2 102.2(9) . . ?
N15_2 C21_2 H21_2 112.9 . . ?
N13_2 C21_2 H21_2 112.9 . . ?
C22_2 C21_2 H21_2 112.9 . . ?
N16_2 C22_2 N14_2 114.0(9) . . ?
N16_2 C22_2 C21_2 104.4(8) . . ?
N14_2 C22_2 C21_2 104.0(10) . . ?
N16_2 C22_2 H22_2 111.3 . . ?
N14_2 C22_2 H22_2 111.3 . . ?
C21_2 C22_2 H22_2 111.3 . . ?
N14_2 C23_2 N17_2 112.6(7) . . ?
N14_2 C23_2 H23A_2 109.1 . . ?
N17_2 C23_2 H23A_2 109.1 . . ?
N14_2 C23_2 H23B_2 109.1 . . ?
N17_2 C23_2 H23B_2 109.1 . . ?
H23A_2 C23_2 H23B_2 107.8 . . ?
N19_2 C24_2 N16_2 112.9(9) . . ?
N19_2 C24_2 H24A_2 109.0 . . ?
N16_2 C24_2 H24A_2 109.0 . . ?
N19_2 C24_2 H24B_2 109.0 . . ?
N16_2 C24_2 H24B_2 109.0 . . ?
H24A_2 C24_2 H24B_2 107.8 . . ?
O9_2 C25_2 N18_2 128.0(10) . . ?
O9_2 C25_2 N17_2 125.2(8) . . ?
N18_2 C25_2 N17_2 106.7(10) . . ?
O10_2 C26_2 N19_2 125.8(10) . . ?
O10_2 C26_2 N20_2 125.8(9) . . ?
N19_2 C26_2 N20_2 108.4(8) . . ?
N17_2 C27_2 N19_2 114.4(7) . . ?
N17_2 C27_2 C28_2 102.8(9) . . ?
N19_2 C27_2 C28_2 102.7(7) . . ?
N17_2 C27_2 H27_2 112.0 . . ?
N19_2 C27_2 H27_2 112.0 . . ?
C28_2 C27_2 H27_2 112.0 . . ?
N20_2 C28_2 N18_2 114.3(6) . . ?
N20_2 C28_2 C27_2 104.9(7) . . ?
N18_2 C28_2 C27_2 103.3(8) . . ?
N20_2 C28_2 H28_2 111.3 . . ?
N18_2 C28_2 H28_2 111.3 . . ?
C27_2 C28_2 H28_2 111.3 . . ?
N21_2 C29_2 N18_2 113.6(5) . . ?
N21_2 C29_2 H29A_2 108.8 . . ?
N18_2 C29_2 H29A_2 108.8 . . ?
N21_2 C29_2 H29B_2 108.8 . . ?
N18_2 C29_2 H29B_2 108.8 . . ?
H29A_2 C29_2 H29B_2 107.7 . . ?
N20_2 C30_2 N23_2 113.4(6) . . ?
N20_2 C30_2 H30A_2 108.9 . . ?
N23_2 C30_2 H30A_2 108.9 . . ?
N20_2 C30_2 H30B_2 108.9 . . ?
N23_2 C30_2 H30B_2 108.9 . . ?
H30A_2 C30_2 H30B_2 107.7 . . ?
O11_2 C31_2 N21_2 125.5(7) . . ?
O11_2 C31_2 N22_2 124.9(8) . . ?
N21_2 C31_2 N22_2 109.6(5) . . ?
O12_2 C32_2 N24_2 126.0(5) . . ?
O12_2 C32_2 N23_2 126.5(6) . . ?
N24_2 C32_2 N23_2 107.5(5) . . ?
N23_2 C33_2 N21_2 113.6(6) . . ?
N23_2 C33_2 C34_2 103.8(5) . . ?
N21_2 C33_2 C34_2 102.3(5) . . ?
N23_2 C33_2 H33_2 112.1 . . ?
N21_2 C33_2 H33_2 112.1 . . ?
C34_2 C33_2 H33_2 112.1 . . ?
N22_2 C34_2 N24_2 114.9(5) . . ?
N22_2 C34_2 C33_2 104.7(5) . . ?
N24_2 C34_2 C33_2 103.1(5) . . ?
N22_2 C34_2 H34_2 111.2 . . ?
N24_2 C34_2 H34_2 111.2 . . ?
C33_2 C34_2 H34_2 111.2 . . ?
N25_2 C35_2 N22_2 114.5(5) . . ?
N25_2 C35_2 H35A_2 108.6 . . ?
N22_2 C35_2 H35A_2 108.6 . . ?
N25_2 C35_2 H35B_2 108.6 . . ?
N22_2 C35_2 H35B_2 108.6 . . ?
H35A_2 C35_2 H35B_2 107.6 . . ?
N27_2 C36_2 N24_2 114.1(5) . . ?
N27_2 C36_2 H36A_2 108.7 . . ?
N24_2 C36_2 H36A_2 108.7 . . ?
N27_2 C36_2 H36B_2 108.7 . . ?
N24_2 C36_2 H36B_2 108.7 . . ?
H36A_2 C36_2 H36B_2 107.6 . . ?
O13_2 C37_2 N26_2 126.7(7) . . ?
O13_2 C37_2 N25_2 126.4(7) . . ?
N26_2 C37_2 N25_2 106.8(7) . . ?
O14_2 C38_2 N27_2 125.7(6) . . ?
O14_2 C38_2 N28_2 126.1(5) . . ?
N27_2 C38_2 N28_2 108.1(5) . . ?
N25_2 C39_2 N27_2 115.7(5) . . ?
N25_2 C39_2 C40_2 101.5(5) . . ?
N27_2 C39_2 C40_2 104.1(5) . . ?
N25_2 C39_2 H39_2 111.6 . . ?
N27_2 C39_2 H39_2 111.6 . . ?
C40_2 C39_2 H39_2 111.6 . . ?
N26_2 C40_2 N28_2 115.5(5) . . ?
N26_2 C40_2 C39_2 104.8(6) . . ?
N28_2 C40_2 C39_2 102.3(5) . . ?
N26_2 C40_2 H40_2 111.2 . . ?
N28_2 C40_2 H40_2 111.2 . . ?
C39_2 C40_2 H40_2 111.2 . . ?
N1_2 C41_2 N26_2 113.0(6) . . ?
N1_2 C41_2 H41A_2 109.0 . . ?
N26_2 C41_2 H41A_2 109.0 . . ?
N1_2 C41_2 H41B_2 109.0 . . ?
N26_2 C41_2 H41B_2 109.0 . . ?
H41A_2 C41_2 H41B_2 107.8 . . ?
N3_2 C42_2 N28_2 114.2(6) . . ?
N3_2 C42_2 H42A_2 108.7 . . ?
N28_2 C42_2 H42A_2 108.7 . . ?
N3_2 C42_2 H42B_2 108.7 . . ?
N28_2 C42_2 H42B_2 108.7 . . ?
H42A_2 C42_2 H42B_2 107.6 . . ?
N1_3 C1_3 H1A_3 109.5 . . ?
N1_3 C1_3 H1B_3 109.5 . . ?
H1A_3 C1_3 H1B_3 109.5 . . ?
N1_3 C1_3 H1C_3 109.5 . . ?
H1A_3 C1_3 H1C_3 109.5 . . ?
H1B_3 C1_3 H1C_3 109.5 . . ?
C2_3 N1_3 C3_3 108.7(5) . . ?
C2_3 N1_3 C1_3 126.6(6) . . ?
C3_3 N1_3 C1_3 124.7(6) . . ?
N1_3 C2_3 N2_3 108.4(5) . . ?
N1_3 C2_3 H2_3 125.8 . . ?
N2_3 C2_3 H2_3 125.8 . . ?
C2_3 N2_3 C4_3 108.4(5) . . ?
C2_3 N2_3 C5_3 125.9(5) . . ?
C4_3 N2_3 C5_3 125.3(5) . . ?
C4_3 C3_3 N1_3 107.4(5) . . ?
C4_3 C3_3 H3_3 126.3 . . ?
N1_3 C3_3 H3_3 126.3 . . ?
C3_3 C4_3 N2_3 107.1(5) . . ?
C3_3 C4_3 H4_3 126.4 . . ?
N2_3 C4_3 H4_3 126.4 . . ?
N2_3 C5_3 C6_3 109.9(4) . . ?
N2_3 C5_3 H5A_3 109.7 . . ?
C6_3 C5_3 H5A_3 109.7 . . ?
N2_3 C5_3 H5B_3 109.7 . . ?
C6_3 C5_3 H5B_3 109.7 . . ?
H5A_3 C5_3 H5B_3 108.2 . . ?
C5_3 C6_3 C7_3 124.8(5) . . ?
C5_3 C6_3 C9_3 126.8(5) . . ?
C7_3 C6_3 C9_3 89.8(4) . . ?
C5_3 C6_3 C8_4 124.2(4) . . ?
C7_3 C6_3 C8_4 90.1(4) . . ?
C9_3 C6_3 C8_4 90.0(4) . . ?
C8_3 C7_3 C7_4 89.5(4) . . ?
C8_3 C7_3 C6_3 89.9(4) . . ?
C7_4 C7_3 C6_3 89.9(4) . . ?
C8_3 C7_3 H7_3 125.4 . . ?
C7_4 C7_3 H7_3 125.4 . . ?
C6_3 C7_3 H7_3 125.4 . . ?
C7_3 C8_3 C9_3 90.6(4) . . ?
C7_3 C8_3 C6_4 90.6(5) . . ?
C9_3 C8_3 C6_4 89.8(4) . . ?
C7_3 C8_3 H8_3 125.0 . . ?
C9_3 C8_3 H8_3 125.0 . . ?
C6_4 C8_3 H8_3 125.0 . . ?
C8_3 C9_3 C6_3 89.8(4) . . ?
C8_3 C9_3 C9_4 90.4(4) . . ?
C6_3 C9_3 C9_4 89.6(4) . . ?
C8_3 C9_3 H9_3 125.3 . . ?
C6_3 C9_3 H9_3 125.3 . . ?
C9_4 C9_3 H9_3 125.3 . . ?
N1_4 C1_4 H1A_4 109.5 . . ?
N1_4 C1_4 H1B_4 109.5 . . ?
H1A_4 C1_4 H1B_4 109.5 . . ?
N1_4 C1_4 H1C_4 109.5 . . ?
H1A_4 C1_4 H1C_4 109.5 . . ?
H1B_4 C1_4 H1C_4 109.5 . . ?
C2_4 N1_4 C3_4 108.7(5) . . ?
C2_4 N1_4 C1_4 125.5(7) . . ?
C3_4 N1_4 C1_4 125.7(7) . . ?
N1_4 C2_4 N2_4 107.9(6) . . ?
N1_4 C2_4 H2_4 126.0 . . ?
N2_4 C2_4 H2_4 126.0 . . ?
C2_4 N2_4 C4_4 108.0(5) . . ?
C2_4 N2_4 C5_4 123.9(6) . . ?
C4_4 N2_4 C5_4 127.1(6) . . ?
C4_4 C3_4 N1_4 108.2(6) . . ?
C4_4 C3_4 H3_4 125.9 . . ?
N1_4 C3_4 H3_4 125.9 . . ?
C3_4 C4_4 N2_4 107.1(6) . . ?
C3_4 C4_4 H4_4 126.4 . . ?
N2_4 C4_4 H4_4 126.4 . . ?
N2_4 C5_4 C6_4 109.7(5) . . ?
N2_4 C5_4 H5A_4 109.7 . . ?
C6_4 C5_4 H5A_4 109.7 . . ?
N2_4 C5_4 H5B_4 109.7 . . ?
C6_4 C5_4 H5B_4 109.7 . . ?
H5A_4 C5_4 H5B_4 108.2 . . ?
C5_4 C6_4 C7_4 126.8(5) . . ?
C5_4 C6_4 C9_4 125.0(5) . . ?
C7_4 C6_4 C9_4 89.3(4) . . ?
C5_4 C6_4 C8_3 125.0(5) . . ?
C7_4 C6_4 C8_3 88.9(4) . . ?
C9_4 C6_4 C8_3 90.4(4) . . ?
C6_4 C7_4 C7_3 90.9(5) . . ?
C6_4 C7_4 C8_4 90.6(4) . . ?
C7_3 C7_4 C8_4 90.7(4) . . ?
C6_4 C7_4 H7_4 124.7 . . ?
C7_3 C7_4 H7_4 124.7 . . ?
C8_4 C7_4 H7_4 124.7 . . ?
C9_4 C8_4 C7_4 89.2(4) . . ?
C9_4 C8_4 C6_3 90.1(4) . . ?
C7_4 C8_4 C6_3 89.2(4) . . ?
C9_4 C8_4 H8_4 125.6 . . ?
C7_4 C8_4 H8_4 125.6 . . ?
C6_3 C8_4 H8_4 125.6 . . ?
C8_4 C9_4 C6_4 90.9(4) . . ?
C8_4 C9_4 C9_3 90.3(4) . . ?
C6_4 C9_4 C9_3 89.4(4) . . ?
C8_4 C9_4 H9_4 125.1 . . ?
C6_4 C9_4 H9_4 125.1 . . ?
C9_3 C9_4 H9_4 125.1 . . ?
N1_5 C1_5 H1A_5 109.5 . . ?
N1_5 C1_5 H1B_5 109.5 . . ?
H1A_5 C1_5 H1B_5 109.5 . . ?
N1_5 C1_5 H1C_5 109.5 . . ?
H1A_5 C1_5 H1C_5 109.5 . . ?
H1B_5 C1_5 H1C_5 109.5 . . ?
C2_5 N1_5 C3_5 107.5(6) . . ?
C2_5 N1_5 C1_5 125.4(8) . . ?
C3_5 N1_5 C1_5 127.1(8) . . ?
N1_5 C2_5 N2_5 109.7(6) . . ?
N1_5 C2_5 H2_5 125.1 . . ?
N2_5 C2_5 H2_5 125.1 . . ?
C2_5 N2_5 C4_5 107.7(6) . . ?
C2_5 N2_5 C5_5 123.8(6) . . ?
C4_5 N2_5 C5_5 128.3(6) . . ?
C4_5 C3_5 N1_5 107.6(7) . . ?
C4_5 C3_5 H3_5 126.2 . . ?
N1_5 C3_5 H3_5 126.2 . . ?
C3_5 C4_5 N2_5 107.5(7) . . ?
C3_5 C4_5 H4_5 126.3 . . ?
N2_5 C4_5 H4_5 126.3 . . ?
N2_5 C5_5 C6_5 109.1(5) . . ?
N2_5 C5_5 H5A_5 109.9 . . ?
C6_5 C5_5 H5A_5 109.9 . . ?
N2_5 C5_5 H5B_5 109.9 . . ?
C6_5 C5_5 H5B_5 109.9 . . ?
H5A_5 C5_5 H5B_5 108.3 . . ?
C5_5 C6_5 C9_5 127.7(6) . . ?
C5_5 C6_5 C7_5 125.4(5) . . ?
C9_5 C6_5 C7_5 89.5(5) . . ?
C5_5 C6_5 C8_6 123.0(5) . . ?
C9_5 C6_5 C8_6 89.5(5) . . ?
C7_5 C6_5 C8_6 90.4(5) . . ?
C8_5 C7_5 C7_6 90.8(5) . . ?
C8_5 C7_5 C6_5 89.8(5) . . ?
C7_6 C7_5 C6_5 89.1(5) . . ?
C8_5 C7_5 H7_5 125.3 . . ?
C7_6 C7_5 H7_5 125.3 . . ?
C6_5 C7_5 H7_5 125.3 . . ?
C7_5 C8_5 C9_5 90.9(5) . . ?
C7_5 C8_5 C6_6 90.4(5) . . ?
C9_5 C8_5 C6_6 89.5(6) . . ?
C7_5 C8_5 H8_5 125.1 . . ?
C9_5 C8_5 H8_5 125.1 . . ?
C6_6 C8_5 H8_5 125.1 . . ?
C6_5 C9_5 C8_5 89.8(5) . . ?
C6_5 C9_5 C9_6 90.1(5) . . ?
C8_5 C9_5 C9_6 90.1(6) . . ?
C6_5 C9_5 H9_5 125.3 . . ?
C8_5 C9_5 H9_5 125.3 . . ?
C9_6 C9_5 H9_5 125.3 . . ?
N1_6 C1_6 H1A_6 109.5 . . ?
N1_6 C1_6 H1B_6 109.5 . . ?
H1A_6 C1_6 H1B_6 109.5 . . ?
N1_6 C1_6 H1C_6 109.5 . . ?
H1A_6 C1_6 H1C_6 109.5 . . ?
H1B_6 C1_6 H1C_6 109.5 . . ?
C2_6 N1_6 C3_6 107.6(8) . . ?
C2_6 N1_6 C1_6 124.0(12) . . ?
C3_6 N1_6 C1_6 128.4(11) . . ?
N1_6 C2_6 N2_6 108.4(9) . . ?
N1_6 C2_6 H2_6 125.8 . . ?
N2_6 C2_6 H2_6 125.8 . . ?
C2_6 N2_6 C4_6 109.1(7) . . ?
C2_6 N2_6 C5_6 127.0(9) . . ?
C4_6 N2_6 C5_6 123.8(8) . . ?
C4_6 C3_6 N1_6 108.7(9) . . ?
C4_6 C3_6 H3_6 125.6 . . ?
N1_6 C3_6 H3_6 125.6 . . ?
C3_6 C4_6 N2_6 106.2(9) . . ?
C3_6 C4_6 H4_6 126.9 . . ?
N2_6 C4_6 H4_6 126.9 . . ?
N2_6 C5_6 C6_6 110.6(6) . . ?
N2_6 C5_6 H5A_6 109.5 . . ?
C6_6 C5_6 H5A_6 109.5 . . ?
N2_6 C5_6 H5B_6 109.5 . . ?
C6_6 C5_6 H5B_6 109.5 . . ?
H5A_6 C5_6 H5B_6 108.1 . . ?
C5_6 C6_6 C9_6 124.7(7) . . ?
C5_6 C6_6 C8_5 123.1(5) . . ?
C9_6 C6_6 C8_5 91.3(6) . . ?
C5_6 C6_6 C7_6 126.6(7) . . ?
C9_6 C6_6 C7_6 90.5(5) . . ?
C8_5 C6_6 C7_6 90.2(5) . . ?
C8_6 C7_6 C6_6 88.6(5) . . ?
C8_6 C7_6 C7_5 91.1(5) . . ?
C6_6 C7_6 C7_5 88.7(5) . . ?
C8_6 C7_6 H7_6 125.6 . . ?
C6_6 C7_6 H7_6 125.6 . . ?
C7_5 C7_6 H7_6 125.6 . . ?
C9_6 C8_6 C7_6 90.7(5) . . ?
C9_6 C8_6 C6_5 90.5(5) . . ?
C7_6 C8_6 C6_5 89.3(5) . . ?
C9_6 C8_6 H8_6 125.2 . . ?
C7_6 C8_6 H8_6 125.2 . . ?
C6_5 C8_6 H8_6 125.2 . . ?
C8_6 C9_6 C6_6 90.2(6) . . ?
C8_6 C9_6 C9_5 89.9(5) . . ?
C6_6 C9_6 C9_5 89.1(6) . . ?
C8_6 C9_6 H9_6 125.5 . . ?
C6_6 C9_6 H9_6 125.5 . . ?
C9_5 C9_6 H9_6 125.5 . . ?
 
_refine_diff_density_max    2.567
_refine_diff_density_min   -1.018
_refine_diff_density_rms    0.129

_shelx_res_file
;
TITL rv2045 in P2(1)/c
    rv2045_sq.res
    created by SHELXL-2016/6 at 18:04:21 on 24-Apr-2017
CELL 0.71073  17.0396  27.7804  34.0065  90.000  90.253  90.000
ZERR    8.00   0.0003   0.0006   0.0006   0.000   0.002   0.000
LATT  1
SYMM -X, 0.5+Y, 0.5-Z
SFAC C H N O I
UNIT 480 512 256 112 16
LIST 4
L.S. 5 0  414
BOND $H
FMAP 2
PLAN 20
temp -153
size 0.10 0.20 0.20
omit -3 2 3
omit 2 4 0
omit 2 2 1
omit 7 3 4
acta
rigu
simu 0.02 0.04 8 $I
isor 0.003 $I
sump 2 0.001 1 3 1 4 1 5 1 6 1 7 1 8 1 9 1 10
ABIN
ACTA
WGHT    0.183000   41.904503
FVAR       0.14379   0.72772   0.56764   0.34645   0.16424   0.17190   0.18737
FVAR       0.08957   0.17737   0.29510
I1    5    0.695499    0.404314    0.510786    11.00000    0.06960    0.06203 =
         0.05545    0.02157   -0.00036   -0.01158
I2A   5    0.474568    1.004150    0.118178    21.00000    0.05046    0.05238 =
         0.03513   -0.00399    0.01132   -0.00479
I2B   5    0.439003    0.996022    0.115937   -21.00000    0.06999    0.06225 =
         0.04559    0.00283    0.00858   -0.01114
I3A   5    0.055591    0.981462    0.581274    31.00000    0.10591    0.08253 =
         0.08349    0.02707   -0.00916   -0.03530
I3B   5    0.102032    0.958784    0.568183    41.00000    0.12670    0.10154 =
         0.10858    0.04643   -0.02323   -0.05652
I3C   5    0.176633    0.927705    0.547560    51.00000    0.17641    0.12469 =
         0.12362    0.01810   -0.00997   -0.01146
I4A   5    0.275949    0.418684    0.218269    61.00000    0.06750    0.07826 =
         0.09645   -0.02448    0.00675    0.00455
I4B   5    1.191767    0.937419    0.439924    71.00000    0.11929    0.08248 =
         0.12006   -0.01508    0.05889   -0.02598
I4C   5    0.297598    0.954443    0.087850    81.00000    0.08273    0.09476 =
         0.07416    0.00351    0.00071   -0.01289
I4D   5    1.117829    0.553587    0.461820    91.00000    0.18789    0.15807 =
         0.21732    0.04159    0.00557   -0.00176
I4E   5    0.706619    0.988377    0.641720   101.00000    0.38362    0.36200 =
         0.38104   -0.04625   -0.00115   -0.00399
RESI 1 CUCU
O1    4    0.083096    0.899778    0.237848    11.00000    0.12404    0.07699 =
         0.06763    0.01122    0.05683    0.01668
O2    4    0.361273    0.843979    0.135017    11.00000    0.11440    0.10572 =
         0.08037    0.04328    0.06714    0.04196
O3    4   -0.013995    0.792510    0.198601    11.00000    0.07415    0.11987 =
         0.03784   -0.00114    0.01067    0.05020
O4    4    0.270807    0.749549    0.097768    11.00000    0.09377    0.14111 =
         0.07903    0.02204    0.04636    0.06553
O5    4   -0.012825    0.670773    0.237682    11.00000    0.05290    0.07623 =
         0.07564   -0.01034   -0.00507    0.00322
O6    4    0.272040    0.620506    0.139777    11.00000    0.09253    0.10651 =
         0.06512   -0.03497   -0.01626    0.05084
O7    4    0.076514    0.606952    0.326314    11.00000    0.07009    0.06801 =
         0.10746    0.00095    0.00893   -0.00365
O8    4    0.362481    0.566623    0.222412    11.00000    0.08935    0.08122 =
         0.07573   -0.02797   -0.01213    0.02980
O9    4    0.188557    0.662199    0.389914    11.00000    0.03647    0.06957 =
         0.05093    0.01886    0.01017    0.00395
O10   4    0.487281    0.622583    0.297984    11.00000    0.06193    0.08296 =
         0.04033   -0.00238    0.01333    0.02065
O11   4    0.244290    0.793366    0.385624    11.00000    0.05581    0.07262 =
         0.05531   -0.00693    0.01624    0.00164
O12   4    0.551162    0.745685    0.303693    11.00000    0.03828    0.10105 =
         0.05267   -0.00986    0.01540   -0.00851
O13   4    0.201557    0.903560    0.326316    11.00000    0.11873    0.05544 =
         0.11379   -0.02615    0.06587   -0.01689
O14   4    0.485506    0.839023    0.229579    11.00000    0.08672    0.08705 =
         0.10812    0.00125    0.05816   -0.01541
N1    3    0.200928    0.927982    0.217103    11.00000    0.13673    0.05465 =
         0.10693    0.00696    0.07030    0.01362
N2    3    0.120176    0.891953    0.172283    11.00000    0.11597    0.08710 =
         0.06708    0.02298    0.05856    0.03454
N3    3    0.315002    0.901413    0.177007    11.00000    0.12317    0.07773 =
         0.09226    0.03574    0.06097    0.01090
N4    3    0.233975    0.870183    0.131249    11.00000    0.11179    0.10267 =
         0.07182    0.02307    0.04937    0.04663
N5    3    0.061428    0.820859    0.147960    11.00000    0.07508    0.11108 =
         0.04302    0.00563    0.01559    0.05425
N6    3    0.021192    0.743629    0.146568    11.00000    0.06415    0.12500 =
         0.03787   -0.00994    0.00084    0.04306
N7    3    0.166682    0.802578    0.101285    11.00000    0.08432    0.12242 =
         0.05143    0.02004    0.02900    0.04935
N8    3    0.142758    0.726206    0.111849    11.00000    0.07428    0.11956 =
         0.04160   -0.00177    0.01122    0.05000
N9    3    0.026988    0.664870    0.174162    11.00000    0.07148    0.11008 =
         0.06805   -0.02925   -0.02156    0.03906
N10   3    0.059012    0.606011    0.215070    11.00000    0.06588    0.07299 =
         0.09413   -0.03496   -0.01822    0.00721
N11   3    0.143551    0.646342    0.135411    11.00000    0.09201    0.10520 =
         0.06441   -0.03297   -0.01590    0.04723
N12   3    0.168865    0.583576    0.174068    11.00000    0.08075    0.08986 =
         0.09691   -0.04480   -0.02711    0.02674
N13   3    0.118917    0.568243    0.270749    11.00000    0.06792    0.05667 =
         0.11168   -0.00588   -0.00507   -0.00100
N14   3    0.187942    0.560623    0.324514    11.00000    0.07425    0.04848 =
         0.11341   -0.00121    0.00409   -0.00531
N15   3    0.231906    0.546424    0.228360    11.00000    0.08962    0.06608 =
         0.09841   -0.03457   -0.02555    0.01975
N16   3    0.301775    0.549348    0.282335    11.00000    0.07547    0.06754 =
         0.08550   -0.00046   -0.01098    0.02441
N17   3    0.268798    0.599641    0.372592    11.00000    0.05483    0.06869 =
         0.05561    0.01604    0.01201    0.01547
N18   3    0.324004    0.667277    0.392118    11.00000    0.03669    0.08405 =
         0.03203    0.00664    0.00725    0.01386
N19   3    0.382914    0.587107    0.331013    11.00000    0.06243    0.06715 =
         0.05576    0.00491    0.01080    0.02120
N20   3    0.446254    0.648402    0.358869    11.00000    0.04222    0.08129 =
         0.03548    0.00215    0.00630    0.01531
N21   3    0.360986    0.750586    0.393632    11.00000    0.03568    0.08988 =
         0.04476   -0.01303    0.00546   -0.00295
N22   3    0.365207    0.826674    0.372063    11.00000    0.06253    0.07256 =
         0.09527   -0.03151    0.03632   -0.01857
N23   3    0.486776    0.731770    0.362127    11.00000    0.04168    0.10299 =
         0.04232   -0.01995    0.01195   -0.00976
N24   3    0.487299    0.806071    0.337931    11.00000    0.04657    0.09495 =
         0.08212   -0.02433    0.02297   -0.02618
N25   3    0.336994    0.892031    0.328933    11.00000    0.11093    0.06091 =
         0.10560   -0.02594    0.05826   -0.02724
N26   3    0.282450    0.927032    0.275537    11.00000    0.12379    0.05494 =
         0.11545   -0.00539    0.07083   -0.00845
N27   3    0.450434    0.868154    0.290181    11.00000    0.09143    0.05610 =
         0.11742   -0.00949    0.04617   -0.02530
N28   3    0.393091    0.898950    0.236660    11.00000    0.10862    0.06776 =
         0.11202    0.00408    0.06696   -0.01463
C1    1    0.130779    0.905227    0.211669    11.00000    0.12640    0.06340 =
         0.07911    0.01930    0.06498    0.01891
C2    1    0.308682    0.868657    0.146202    11.00000    0.10754    0.09091 =
         0.06981    0.03238    0.05695    0.02615
C3    1    0.240382    0.932091    0.178011    11.00000    0.13044    0.05821 =
         0.12272    0.03710    0.08087    0.02388
AFIX  13
H3    2    0.251278    0.966388    0.170971    11.00000   -1.20000
AFIX   0
C4    1    0.186193    0.908433    0.148587    11.00000    0.12842    0.09045 =
         0.08804    0.04002    0.06965    0.04164
AFIX  13
H4    2    0.168542    0.931923    0.128097    11.00000   -1.20000
AFIX   0
C5    1    0.053211    0.870425    0.157580    11.00000    0.10328    0.11382 =
         0.06133    0.02216    0.04157    0.05122
AFIX  23
H5A   2    0.036468    0.888046    0.133670    11.00000   -1.20000
H5B   2    0.010912    0.873734    0.177260    11.00000   -1.20000
AFIX   0
C6    1    0.209476    0.844624    0.096366    11.00000    0.10092    0.12542 =
         0.05711    0.02103    0.04786    0.04732
AFIX  23
H6A   2    0.177644    0.866912    0.080122    11.00000   -1.20000
H6B   2    0.257065    0.836644    0.081095    11.00000   -1.20000
AFIX   0
C7    1    0.021241    0.787017    0.167791    11.00000    0.06729    0.11795 =
         0.03207    0.00484    0.00509    0.04862
C8    1    0.196324    0.758029    0.103563    11.00000    0.08320    0.11986 =
         0.03371    0.01259    0.01479    0.05200
C9    1    0.086020    0.803945    0.108812    11.00000    0.07698    0.14015 =
         0.03213    0.01208    0.01529    0.05547
AFIX  13
H9    2    0.056564    0.820672    0.087296    11.00000   -1.20000
AFIX   0
C10   1    0.065402    0.749778    0.110684    11.00000    0.06967    0.13439 =
         0.04019   -0.01286   -0.00375    0.05092
AFIX  13
H10   2    0.034306    0.739469    0.087142    11.00000   -1.20000
AFIX   0
C11   1   -0.021728    0.702667    0.157349    11.00000    0.06125    0.12313 =
         0.06314   -0.01196   -0.00840    0.03423
AFIX  23
H11A  2   -0.049175    0.689882    0.133851    11.00000   -1.20000
H11B  2   -0.062088    0.712050    0.176748    11.00000   -1.20000
AFIX   0
C12   1    0.153086    0.676788    0.102304    11.00000    0.10574    0.13886 =
         0.05576   -0.03269    0.00173    0.06935
AFIX  23
H12A  2    0.114533    0.667588    0.081777    11.00000   -1.20000
H12B  2    0.206282    0.672079    0.091364    11.00000   -1.20000
AFIX   0
C13   1    0.021233    0.650241    0.210856    11.00000    0.05982    0.08303 =
         0.07372   -0.02472   -0.01912    0.00858
C14   1    0.202766    0.617481    0.148577    11.00000    0.07958    0.09510 =
         0.07378   -0.04913   -0.02366    0.04447
C15   1    0.066407    0.630232    0.147947    11.00000    0.07691    0.11996 =
         0.08452   -0.04474   -0.02590    0.03595
AFIX  13
H15   2    0.032389    0.619828    0.125468    11.00000   -1.20000
AFIX   0
C16   1    0.083503    0.588437    0.177833    11.00000    0.08182    0.09199 =
         0.10338   -0.04807   -0.02716    0.01575
AFIX  13
H16   2    0.055498    0.558115    0.170407    11.00000   -1.20000
AFIX   0
C17   1    0.047082    0.575375    0.248939    11.00000    0.07094    0.06750 =
         0.12852   -0.01566   -0.01565   -0.01619
AFIX  23
H17A  2    0.007366    0.590154    0.266336    11.00000   -1.20000
H17B  2    0.026656    0.543790    0.240118    11.00000   -1.20000
AFIX   0
C18   1    0.215758    0.543398    0.187855    11.00000    0.10777    0.08537 =
         0.10381   -0.05163   -0.02782    0.03702
AFIX  23
H18A  2    0.187456    0.512992    0.182369    11.00000   -1.20000
H18B  2    0.265828    0.542642    0.173211    11.00000   -1.20000
AFIX   0
C19   1    0.122646    0.581474    0.308664    11.00000    0.06208    0.04941 =
         0.11440    0.00148   -0.00104   -0.00666
C20   1    0.305367    0.555705    0.242663    11.00000    0.08140    0.04901 =
         0.08677   -0.02065   -0.01816    0.03427
C21   1    0.177498    0.532734    0.259869    11.00000    0.08967    0.04450 =
         0.13847   -0.01789   -0.01513    0.00303
AFIX  13
H21   2    0.152822    0.500740    0.254452    11.00000   -1.20000
AFIX   0
C22   1    0.228348    0.530993    0.296444    11.00000    0.08856    0.04353 =
         0.12293   -0.00280   -0.00283    0.00492
AFIX  13
H22   2    0.234111    0.497259    0.306302    11.00000   -1.20000
AFIX   0
C23   1    0.209065    0.564968    0.365997    11.00000    0.07216    0.05934 =
         0.10629    0.02540    0.01661    0.00418
AFIX  23
H23A  2    0.161888    0.574112    0.381155    11.00000   -1.20000
H23B  2    0.227238    0.533295    0.375792    11.00000   -1.20000
AFIX   0
C24   1    0.374601    0.546483    0.304875    11.00000    0.08363    0.06782 =
         0.08218   -0.00924   -0.00656    0.03198
AFIX  23
H24A  2    0.375089    0.516349    0.320414    11.00000   -1.20000
H24B  2    0.419649    0.545590    0.286604    11.00000   -1.20000
AFIX   0
C25   1    0.252667    0.644813    0.385578    11.00000    0.04257    0.06583 =
         0.03494    0.01380    0.00903    0.01032
C26   1    0.442541    0.619622    0.326648    11.00000    0.05150    0.07416 =
         0.03463    0.00757    0.00530    0.03098
C27   1    0.352117    0.589401    0.370602    11.00000    0.06081    0.07218 =
         0.05489    0.01768    0.00765    0.02458
AFIX  13
H27   2    0.366134    0.560017    0.386099    11.00000   -1.20000
AFIX   0
C28   1    0.388670    0.633977    0.387970    11.00000    0.04423    0.09078 =
         0.03514    0.01650    0.00911    0.02357
AFIX  13
H28   2    0.414036    0.627028    0.413928    11.00000   -1.20000
AFIX   0
C29   1    0.328419    0.710230    0.415137    11.00000    0.03652    0.09447 =
         0.03455   -0.00326    0.00706    0.00813
AFIX  23
H29A  2    0.361295    0.704028    0.438672    11.00000   -1.20000
H29B  2    0.275109    0.718788    0.424245    11.00000   -1.20000
AFIX   0
C30   1    0.508806    0.681887    0.366274    11.00000    0.04174    0.11192 =
         0.03770   -0.00472    0.00458    0.01534
AFIX  23
H30A  2    0.552268    0.674960    0.347898    11.00000   -1.20000
H30B  2    0.528808    0.676661    0.393316    11.00000   -1.20000
AFIX   0
C31   1    0.317185    0.790437    0.384051    11.00000    0.05175    0.07411 =
         0.05100   -0.01791    0.01805   -0.00880
C32   1    0.511772    0.759578    0.331938    11.00000    0.04106    0.09170 =
         0.05531   -0.02443    0.01260   -0.02037
C33   1    0.445213    0.759786    0.391483    11.00000    0.03618    0.10820 =
         0.05173   -0.02983    0.00736   -0.01209
AFIX  13
H33   2    0.470823    0.757246    0.417917    11.00000   -1.20000
AFIX   0
C34   1    0.448362    0.811567    0.375494    11.00000    0.05224    0.09629 =
         0.08255   -0.04757    0.02157   -0.03010
AFIX  13
H34   2    0.478547    0.833282    0.393485    11.00000   -1.20000
AFIX   0
C35   1    0.340676    0.876079    0.368214    11.00000    0.10499    0.07043 =
         0.10582   -0.03731    0.04977   -0.01642
AFIX  23
H35A  2    0.288252    0.879794    0.380276    11.00000   -1.20000
H35B  2    0.377765    0.896802    0.382978    11.00000   -1.20000
AFIX   0
C36   1    0.511625    0.847621    0.312933    11.00000    0.07176    0.09110 =
         0.11269   -0.03085    0.03724   -0.04515
AFIX  23
H36A  2    0.534061    0.872898    0.330151    11.00000   -1.20000
H36B  2    0.553665    0.836775    0.294991    11.00000   -1.20000
AFIX   0
C37   1    0.268133    0.907223    0.312444    11.00000    0.12408    0.04321 =
         0.10816   -0.02518    0.06215   -0.01774
C38   1    0.447476    0.865198    0.249512    11.00000    0.08765    0.06772 =
         0.11102    0.00123    0.05402   -0.02702
C39   1    0.403119    0.908114    0.305863    11.00000    0.10530    0.06417 =
         0.13038   -0.02409    0.05355   -0.03611
AFIX  13
H39   2    0.435957    0.932228    0.320285    11.00000   -1.20000
AFIX   0
C40   1    0.363972    0.930400    0.266817    11.00000    0.11662    0.05365 =
         0.13379   -0.00726    0.06006   -0.02907
AFIX  13
H40   2    0.380622    0.964494    0.262446    11.00000   -1.20000
AFIX   0
C41   1    0.224128    0.951864    0.251561    11.00000    0.12052    0.05688 =
         0.13599   -0.00159    0.06641   -0.00336
AFIX  23
H41A  2    0.176971    0.957469    0.267834    11.00000   -1.20000
H41B  2    0.245435    0.983759    0.244217    11.00000   -1.20000
AFIX   0
C42   1    0.384394    0.913270    0.194719    11.00000    0.13251    0.06868 =
         0.10790    0.02229    0.06521   -0.01034
AFIX  23
H42A  2    0.391173    0.948594    0.192924    11.00000   -1.20000
H42B  2    0.427509    0.898256    0.179637    11.00000   -1.20000
AFIX   0
RESI 2 CUCU
O1    4    0.988655    0.628216    0.525285    11.00000    0.06833    0.12444 =
         0.05627    0.03862    0.00804   -0.02291
O2    4    0.835187    0.658309    0.363841    11.00000    0.06008    0.06475 =
         0.04618    0.00115    0.01637   -0.01032
O3    4    1.078598    0.752575    0.523925    11.00000    0.06001    0.11275 =
         0.04639    0.01779   -0.00520   -0.01603
O4    4    0.901065    0.781065    0.369239    11.00000    0.05318    0.07069 =
         0.03951    0.01093    0.00465   -0.00496
O5    4    0.978452    0.845176    0.562602    11.00000    0.07938    0.09404 =
         0.04914    0.00109   -0.00610   -0.03754
O6    4    0.804583    0.891442    0.411777    11.00000    0.05721    0.07769 =
         0.06686    0.00389   -0.00081   -0.00410
O7    4    0.787426    0.850093    0.616600    11.00000    0.12203    0.10968 =
         0.05766   -0.02895    0.02159   -0.05897
O8    4    0.620269    0.892676    0.465406    11.00000    0.07443    0.10500 =
         0.10760    0.01084    0.02399    0.02369
O9    4    0.649324    0.759929    0.642751    11.00000    0.09229    0.12787 =
         0.05557   -0.03231    0.02481   -0.05787
O10   4    0.478575    0.794807    0.489715    11.00000    0.08287    0.11055 =
         0.08081    0.00375    0.04009    0.02487
O11   4    0.659930    0.627369    0.616329    11.00000    0.06274    0.12613 =
         0.04801   -0.00418   -0.00671   -0.03545
O12   4    0.489002    0.677279    0.464879    11.00000    0.04333    0.07646 =
         0.03443   -0.00161    0.00517   -0.00947
O13   4    0.811915    0.562840    0.565871    11.00000    0.08309    0.13455 =
         0.06284    0.03780   -0.00088   -0.03629
O14   4    0.659320    0.620513    0.411433    11.00000    0.05899    0.05854 =
         0.03820    0.00071    0.00888   -0.01486
N1    3    0.932825    0.586604    0.472426    11.00000    0.05897    0.09298 =
         0.07267    0.04468    0.00998   -0.01802
N2    3    1.015087    0.646359    0.460369    11.00000    0.05618    0.07304 =
         0.05364    0.01820    0.01352   -0.00812
N3    3    0.871912    0.599053    0.408779    11.00000    0.05689    0.06819 =
         0.05844    0.01262    0.01876   -0.01415
N4    3    0.956295    0.657339    0.396104    11.00000    0.04464    0.06807 =
         0.05982    0.02013    0.02007   -0.01130
N5    3    1.066962    0.727162    0.460116    11.00000    0.04450    0.07347 =
         0.04524    0.01716    0.00849   -0.00785
N6    3    1.072429    0.804828    0.471311    11.00000    0.05409    0.08225 =
         0.03679    0.00521   -0.00233   -0.01118
N7    3    1.004925    0.738929    0.395198    11.00000    0.04889    0.06466 =
         0.04446    0.01010    0.00879   -0.00951
N8    3    0.989556    0.815274    0.412713    11.00000    0.04412    0.07071 =
         0.03571    0.00881    0.00524   -0.00226
N9    3    1.001506    0.871781    0.499329    11.00000    0.06378    0.08507 =
         0.04416    0.00172    0.00642   -0.02109
N10   3    0.899647    0.903104    0.532277    11.00000    0.08777    0.07308 =
         0.05043   -0.01065    0.01724   -0.02477
N11   3    0.926302    0.885722    0.439079    11.00000    0.04790    0.07392 =
         0.04945   -0.00388    0.00578   -0.01260
N12   3    0.834343    0.924053    0.472382    11.00000    0.07204    0.07045 =
         0.06785   -0.00167    0.02081   -0.01454
N13   3    0.778750    0.907666    0.568339    11.00000    0.10677    0.08506 =
         0.07212   -0.02994    0.03492   -0.03564
N14   3    0.670172    0.878399    0.593631    11.00000    0.12005    0.10417 =
         0.06821   -0.03216    0.05017   -0.03665
N15   3    0.709592    0.925456    0.507816    11.00000    0.10044    0.08534 =
         0.09048   -0.01046    0.04777   -0.00798
N16   3    0.603010    0.894737    0.532840    11.00000    0.09988    0.07303 =
         0.11650   -0.00708    0.04807   -0.00184
N17   3    0.574748    0.816834    0.612123    11.00000    0.10779    0.09632 =
         0.07504   -0.04518    0.05051   -0.03404
N18   3    0.537173    0.741583    0.608007    11.00000    0.07452    0.09852 =
         0.05315   -0.02133    0.03314   -0.02980
N19   3    0.515666    0.829690    0.548058    11.00000    0.08266    0.09243 =
         0.10033   -0.01463    0.05339   -0.00673
N20   3    0.461210    0.756765    0.549139    11.00000    0.07276    0.08380 =
         0.05845   -0.01692    0.03505    0.01036
N21   3    0.545836    0.656557    0.591377    11.00000    0.06078    0.09171 =
         0.03428   -0.01481    0.00970   -0.03158
N22   3    0.596592    0.590668    0.564604    11.00000    0.05880    0.07032 =
         0.03283    0.00773    0.00531   -0.03031
N23   3    0.470927    0.673689    0.532329    11.00000    0.05231    0.08358 =
         0.03466   -0.00916    0.01631   -0.01352
N24   3    0.533835    0.614163    0.502861    11.00000    0.05043    0.06166 =
         0.02877   -0.00160    0.00383   -0.01735
N25   3    0.700315    0.548943    0.529109    11.00000    0.06239    0.07003 =
         0.04988    0.01492    0.01101   -0.02241
N26   3    0.814182    0.550897    0.498790    11.00000    0.05242    0.09873 =
         0.06590    0.03437    0.01166   -0.01072
N27   3    0.639540    0.575752    0.467729    11.00000    0.05012    0.05138 =
         0.04006    0.00177    0.01013   -0.01433
N28   3    0.751847    0.566951    0.435813    11.00000    0.05987    0.06038 =
         0.05320    0.00983    0.02336   -0.00817
C1    1    0.979212    0.622206    0.489890    11.00000    0.05485    0.09156 =
         0.06020    0.03087    0.01077   -0.01054
C2    1    0.883215    0.640215    0.386773    11.00000    0.05049    0.05147 =
         0.04563   -0.00129    0.02227   -0.00511
C3    1    0.941479    0.584896    0.430597    11.00000    0.05920    0.06817 =
         0.07064    0.02157    0.01466   -0.00483
AFIX  13
H3    2    0.962430    0.553170    0.421543    11.00000   -1.20000
AFIX   0
C4    1    0.999424    0.626510    0.422323    11.00000    0.05692    0.06268 =
         0.05881    0.01554    0.02042   -0.00142
AFIX  13
H4    2    1.048571    0.614401    0.409766    11.00000   -1.20000
AFIX   0
C5    1    1.082075    0.676351    0.467773    11.00000    0.04635    0.08345 =
         0.05360    0.02152    0.00887    0.00069
AFIX  23
H5A   2    1.126005    0.665504    0.451004    11.00000   -1.20000
H5B   2    1.098489    0.672455    0.495553    11.00000   -1.20000
AFIX   0
C6    1    0.992325    0.696127    0.373398    11.00000    0.06033    0.06907 =
         0.04103    0.01025    0.02136   -0.01493
AFIX  23
H6A   2    1.043319    0.684728    0.363122    11.00000   -1.20000
H6B   2    0.958202    0.703584    0.350562    11.00000   -1.20000
AFIX   0
C7    1    1.072282    0.759992    0.488394    11.00000    0.03685    0.09065 =
         0.04056    0.01020    0.00169   -0.00891
C8    1    0.958463    0.778578    0.390547    11.00000    0.04853    0.06909 =
         0.02727    0.01267    0.01304   -0.00455
C9    1    1.072012    0.747698    0.420378    11.00000    0.03847    0.07141 =
         0.04254    0.01429    0.00838   -0.00864
AFIX  13
H9    2    1.122417    0.739020    0.407200    11.00000   -1.20000
AFIX   0
C10   1    1.066489    0.802223    0.428758    11.00000    0.03939    0.07419 =
         0.03834    0.00964    0.00575   -0.00821
AFIX  13
H10   2    1.109731    0.820462    0.415690    11.00000   -1.20000
AFIX   0
C11   1    1.076538    0.849205    0.493155    11.00000    0.05394    0.08875 =
         0.05691   -0.00152   -0.00535   -0.01950
AFIX  23
H11A  2    1.101065    0.842685    0.519057    11.00000   -1.20000
H11B  2    1.110956    0.871950    0.478919    11.00000   -1.20000
AFIX   0
C12   1    0.966098    0.864033    0.405770    11.00000    0.05865    0.06928 =
         0.04182    0.01163    0.00413   -0.00391
AFIX  23
H12A  2    0.930705    0.864957    0.382617    11.00000   -1.20000
H12B  2    1.013152    0.883411    0.399467    11.00000   -1.20000
AFIX   0
C13   1    0.960511    0.870767    0.534101    11.00000    0.07661    0.07502 =
         0.04395   -0.00769    0.00420   -0.04093
C14   1    0.851303    0.898635    0.438122    11.00000    0.05318    0.05404 =
         0.06144    0.00478    0.00951   -0.01128
C15   1    0.968627    0.906255    0.472640    11.00000    0.06041    0.06980 =
         0.05391   -0.00092    0.00631   -0.02140
AFIX  13
H15   2    1.008468    0.930498    0.464129    11.00000   -1.20000
AFIX   0
C16   1    0.901081    0.930047    0.496836    11.00000    0.08577    0.05860 =
         0.06441   -0.00694    0.02348   -0.02719
AFIX  13
H16   2    0.911959    0.964855    0.502001    11.00000   -1.20000
AFIX   0
C17   1    0.859759    0.920806    0.566968    11.00000    0.10554    0.08402 =
         0.06372   -0.02766    0.03066   -0.03156
AFIX  23
H17A  2    0.886557    0.908017    0.590651    11.00000   -1.20000
H17B  2    0.863977    0.956338    0.567687    11.00000   -1.20000
AFIX   0
C18   1    0.761889    0.949035    0.479324    11.00000    0.09420    0.08261 =
         0.10430    0.00452    0.04910    0.00470
AFIX  23
H18A  2    0.733510    0.952380    0.454006    11.00000   -1.20000
H18B  2    0.774112    0.981840    0.488935    11.00000   -1.20000
AFIX   0
C19   1    0.748134    0.876900    0.594481    11.00000    0.12194    0.09705 =
         0.05500   -0.03328    0.03703   -0.03786
C20   1    0.641279    0.903469    0.498077    11.00000    0.07548    0.07391 =
         0.11069   -0.00054    0.03516    0.01387
C21   1    0.718081    0.936127    0.548992    11.00000    0.10444    0.07568 =
         0.10248   -0.02378    0.04554   -0.01137
AFIX  13
H21   2    0.723075    0.971380    0.554397    11.00000   -1.20000
AFIX   0
C22   1    0.642353    0.914221    0.565907    11.00000    0.11835    0.09079 =
         0.11062   -0.02043    0.06709   -0.01510
AFIX  13
H22   2    0.609696    0.939232    0.579232    11.00000   -1.20000
AFIX   0
C23   1    0.620876    0.858841    0.625011    11.00000    0.14247    0.10982 =
         0.07880   -0.04676    0.06628   -0.06077
AFIX  23
H23A  2    0.584645    0.884258    0.634248    11.00000   -1.20000
H23B  2    0.654672    0.849371    0.647466    11.00000   -1.20000
AFIX   0
C24   1    0.522571    0.878033    0.533943    11.00000    0.09157    0.09313 =
         0.13536   -0.00891    0.05582    0.00980
AFIX  23
H24A  2    0.491758    0.899622    0.551140    11.00000   -1.20000
H24B  2    0.499847    0.879910    0.507144    11.00000   -1.20000
AFIX   0
C25   1    0.594149    0.770874    0.622831    11.00000    0.08826    0.10261 =
         0.05693   -0.03622    0.03962   -0.04437
C26   1    0.484391    0.793941    0.525066    11.00000    0.08138    0.09094 =
         0.08122   -0.01444    0.04153    0.01942
C27   1    0.503866    0.820163    0.589520    11.00000    0.09038    0.10511 =
         0.08607   -0.03968    0.05701   -0.01754
AFIX  13
H27   2    0.465363    0.842951    0.601516    11.00000   -1.20000
AFIX   0
C28   1    0.473668    0.768176    0.589546    11.00000    0.07643    0.10109 =
         0.06543   -0.02715    0.04156   -0.00753
AFIX  13
H28   2    0.424011    0.765201    0.604919    11.00000   -1.20000
AFIX   0
C29   1    0.531127    0.691893    0.621739    11.00000    0.08983    0.10722 =
         0.03367   -0.01677    0.03111   -0.04606
AFIX  23
H29A  2    0.569151    0.686936    0.643459    11.00000   -1.20000
H29B  2    0.477853    0.686619    0.632410    11.00000   -1.20000
AFIX   0
C30   1    0.421675    0.715240    0.534741    11.00000    0.05375    0.10776 =
         0.05470   -0.01627    0.02481   -0.00065
AFIX  23
H30A  2    0.400206    0.722355    0.508274    11.00000   -1.20000
H30B  2    0.376921    0.707970    0.552231    11.00000   -1.20000
AFIX   0
C31   1    0.606440    0.625891    0.592792    11.00000    0.05351    0.08977 =
         0.03382   -0.00097    0.01005   -0.04005
C32   1    0.497326    0.657346    0.496555    11.00000    0.03541    0.07197 =
         0.03206   -0.00956    0.00887   -0.01754
C33   1    0.484911    0.640600    0.563592    11.00000    0.05167    0.09086 =
         0.03216   -0.00232    0.00907   -0.02513
AFIX  13
H33   2    0.435371    0.631135    0.577221    11.00000   -1.20000
AFIX   0
C34   1    0.524517    0.597584    0.543297    11.00000    0.05734    0.07286 =
         0.02967    0.00202    0.00709   -0.03345
AFIX  13
H34   2    0.490701    0.568206    0.544514    11.00000   -1.20000
AFIX   0
C35   1    0.645199    0.547917    0.561344    11.00000    0.06568    0.07066 =
         0.04617    0.01467    0.01109   -0.02837
AFIX  23
H35A  2    0.674805    0.543717    0.586222    11.00000   -1.20000
H35B  2    0.610594    0.519553    0.558108    11.00000   -1.20000
AFIX   0
C36   1    0.557095    0.582863    0.470689    11.00000    0.05271    0.06483 =
         0.03169   -0.00797    0.00522   -0.01724
AFIX  23
H36A  2    0.531474    0.551168    0.474136    11.00000   -1.20000
H36B  2    0.537614    0.596790    0.445690    11.00000   -1.20000
AFIX   0
C37   1    0.779529    0.554439    0.534980    11.00000    0.05549    0.08795 =
         0.06409    0.02793    0.01156   -0.01919
C38   1    0.681511    0.591029    0.435940    11.00000    0.05029    0.05927 =
         0.03423   -0.00177    0.00726   -0.01973
C39   1    0.679489    0.537897    0.489038    11.00000    0.05772    0.04607 =
         0.05422    0.00413    0.01521   -0.01432
AFIX  13
H39   2    0.650683    0.506624    0.487047    11.00000   -1.20000
AFIX   0
C40   1    0.761004    0.535028    0.469499    11.00000    0.06051    0.05185 =
         0.07048    0.01572    0.02259   -0.00855
AFIX  13
H40   2    0.773227    0.501418    0.460963    11.00000   -1.20000
AFIX   0
C41   1    0.899628    0.547588    0.495064    11.00000    0.04916    0.10714 =
         0.09429    0.05812    0.01654   -0.01292
AFIX  23
H41A  2    0.923499    0.547627    0.521658    11.00000   -1.20000
H41B  2    0.913135    0.516654    0.482323    11.00000   -1.20000
AFIX   0
C42   1    0.805123    0.568273    0.402975    11.00000    0.05580    0.07320 =
         0.04925    0.00311    0.01846   -0.01324
AFIX  23
H42A  2    0.823921    0.535178    0.397738    11.00000   -1.20000
H42B  2    0.776030    0.579299    0.379376    11.00000   -1.20000
AFIX   0
SAME_CUBI C1 > C9
RESI 3 CUBI
C1    1   -0.083926    0.829464    0.273205    11.00000    0.05319    0.10364 =
         0.05196    0.01297    0.01496    0.02552
AFIX 137
H1A   2   -0.074223    0.858160    0.257186    11.00000   -1.50000
H1B   2   -0.120215    0.837522    0.294491    11.00000   -1.50000
H1C   2   -0.107006    0.804179    0.256720    11.00000   -1.50000
AFIX   0
N1    3   -0.010084    0.812413    0.289884    11.00000    0.04942    0.07026 =
         0.03889    0.01172    0.01987    0.01481
C2    1    0.019607    0.768897    0.286469    11.00000    0.04369    0.06038 =
         0.03333    0.00179    0.01722   -0.00138
AFIX  43
H2    2   -0.002859    0.743095    0.271948    11.00000   -1.20000
AFIX   0
N2    3    0.086904    0.767153    0.306948    11.00000    0.04337    0.04451 =
         0.03108    0.00401    0.01771    0.00127
C3    1    0.039501    0.839697    0.312957    11.00000    0.06361    0.05088 =
         0.04485    0.00627    0.02679    0.01096
AFIX  43
H3    2    0.032221    0.872446    0.320107    11.00000   -1.20000
AFIX   0
C4    1    0.099808    0.811563    0.323440    11.00000    0.05265    0.05272 =
         0.04065   -0.00033    0.01998   -0.00046
AFIX  43
H4    2    0.143376    0.820627    0.339317    11.00000   -1.20000
AFIX   0
C5    1    0.142341    0.726838    0.307642    11.00000    0.05762    0.04740 =
         0.04428    0.01321    0.02145    0.01038
AFIX  23
H5A   2    0.113959    0.696343    0.302614    11.00000   -1.20000
H5B   2    0.167417    0.724660    0.333898    11.00000   -1.20000
AFIX   0
C6    1    0.203207    0.733961    0.277247    11.00000    0.05062    0.04282 =
         0.03527    0.00543    0.01497    0.00695
C7    1    0.187483    0.734397    0.232114    11.00000    0.04753    0.07298 =
         0.03812    0.00132    0.01107    0.00557
AFIX  13
H7    2    0.134940    0.730565    0.219277    11.00000   -1.20000
AFIX   0
C8    1    0.241821    0.778569    0.227833    11.00000    0.05689    0.06291 =
         0.05390    0.02486    0.03004    0.02011
AFIX  13
H8    2    0.229582    0.807859    0.211850    11.00000   -1.20000
AFIX   0
C9    1    0.258139    0.778377    0.272653    11.00000    0.05347    0.04937 =
         0.05614   -0.00512    0.02320   -0.00032
AFIX  13
H9    2    0.258075    0.807425    0.290020    11.00000   -1.20000
AFIX   0
RESI 4 CUBI
C1    1    0.619471    0.676826    0.239734    11.00000    0.04703    0.15462 =
         0.05645   -0.02640    0.00839    0.02263
AFIX 137
H1A   2    0.652149    0.654824    0.224337    11.00000   -1.50000
H1B   2    0.611032    0.663285    0.265987    11.00000   -1.50000
H1C   2    0.645936    0.708016    0.242118    11.00000   -1.50000
AFIX   0
N1    3    0.543194    0.683376    0.219815    11.00000    0.04959    0.09803 =
         0.03880   -0.00494    0.01600    0.01203
C2    1    0.504566    0.725013    0.216270    11.00000    0.05767    0.08897 =
         0.04928   -0.00993    0.02476    0.00578
AFIX  43
H2    2    0.521280    0.755316    0.226178    11.00000   -1.20000
AFIX   0
N2    3    0.437786    0.716434    0.196181    11.00000    0.05095    0.07688 =
         0.03673    0.00632    0.02063    0.01020
C3    1    0.499858    0.648208    0.203204    11.00000    0.06557    0.07608 =
         0.04524   -0.00147    0.01011    0.01855
AFIX  43
H3    2    0.513627    0.615111    0.201897    11.00000   -1.20000
AFIX   0
C4    1    0.433736    0.668057    0.188792    11.00000    0.05663    0.08233 =
         0.04219   -0.00284    0.01228    0.01669
AFIX  43
H4    2    0.392060    0.651601    0.175908    11.00000   -1.20000
AFIX   0
C5    1    0.375336    0.751889    0.190851    11.00000    0.05631    0.08833 =
         0.04438    0.01652    0.02465    0.01493
AFIX  23
H5A   2    0.351675    0.748252    0.164377    11.00000   -1.20000
H5B   2    0.397357    0.784771    0.192951    11.00000   -1.20000
AFIX   0
C6    1    0.314121    0.744842    0.221405    11.00000    0.05188    0.05573 =
         0.03708    0.00686    0.01888    0.00662
C7    1    0.259070    0.700860    0.225837    11.00000    0.05644    0.05713 =
         0.04701   -0.00855    0.01797    0.00234
AFIX  13
H7    2    0.259347    0.672018    0.208243    11.00000   -1.20000
AFIX   0
C8    1    0.275030    0.699560    0.271012    11.00000    0.05554    0.05719 =
         0.04425    0.01357    0.01811    0.01569
AFIX  13
H8    2    0.286856    0.670063    0.286817    11.00000   -1.20000
AFIX   0
C9    1    0.329701    0.743634    0.266473    11.00000    0.04912    0.07207 =
         0.03582   -0.00060    0.01575    0.00530
AFIX  13
H9    2    0.382328    0.747252    0.279264    11.00000   -1.20000
AFIX   0
RESI 5 CUBI
C1    1    0.757137    0.745669    0.313988    11.00000    0.08358    0.19974 =
         0.04557    0.00321    0.00550   -0.03184
AFIX 137
H1A   2    0.737046    0.764943    0.292007    11.00000   -1.50000
H1B   2    0.745084    0.711632    0.309394    11.00000   -1.50000
H1C   2    0.814105    0.749868    0.316096    11.00000   -1.50000
AFIX   0
N1    3    0.719950    0.761495    0.350642    11.00000    0.05885    0.11835 =
         0.04724    0.00957   -0.00555   -0.03581
C2    1    0.696177    0.733047    0.379007    11.00000    0.04139    0.08585 =
         0.04711    0.00115   -0.00091   -0.01344
AFIX  43
H2    2    0.699668    0.698919    0.378783    11.00000   -1.20000
AFIX   0
N2    3    0.666335    0.759326    0.408238    11.00000    0.04437    0.06984 =
         0.05279    0.00190    0.00272   -0.01464
C3    1    0.705087    0.807944    0.362055    11.00000    0.08868    0.09474 =
         0.07349    0.02378   -0.01425   -0.03528
AFIX  43
H3    2    0.716053    0.836181    0.347310    11.00000   -1.20000
AFIX   0
C4    1    0.672203    0.806282    0.397871    11.00000    0.09127    0.07510 =
         0.08119    0.00542   -0.01230   -0.02319
AFIX  43
H4    2    0.656026    0.833120    0.413134    11.00000   -1.20000
AFIX   0
C5    1    0.639409    0.738932    0.445727    11.00000    0.04741    0.08086 =
         0.05169   -0.00385    0.01062   -0.01805
AFIX  23
H5A   2    0.621714    0.705338    0.441715    11.00000   -1.20000
H5B   2    0.594585    0.757870    0.455812    11.00000   -1.20000
AFIX   0
C6    1    0.704730    0.740095    0.474420    11.00000    0.04455    0.06169 =
         0.04372   -0.00483    0.01193   -0.02329
C7    1    0.786838    0.714999    0.468966    11.00000    0.05421    0.09358 =
         0.04568   -0.01128    0.00817    0.00321
AFIX  13
H7    2    0.803977    0.697159    0.444950    11.00000   -1.20000
AFIX   0
C8    1    0.827357    0.759683    0.486080    11.00000    0.05476    0.11921 =
         0.05669    0.01852    0.00317   -0.03909
AFIX  13
H8    2    0.875407    0.775214    0.475047    11.00000   -1.20000
AFIX   0
C9    1    0.746732    0.785031    0.491585    11.00000    0.08563    0.07252 =
         0.06780   -0.01337    0.00433   -0.03198
AFIX  13
H9    2    0.734852    0.819153    0.484326    11.00000   -1.20000
AFIX   0
RESI 6 CUBI
C1    1    0.769279    0.703930    0.687447    11.00000    0.09197    0.39691 =
         0.08817    0.06126    0.00743    0.01751
AFIX 137
H1A   2    0.784406    0.678420    0.705886    11.00000   -1.50000
H1B   2    0.712643    0.702321    0.682480    11.00000   -1.50000
H1C   2    0.782531    0.735353    0.698765    11.00000   -1.50000
AFIX   0
N1    3    0.811981    0.697424    0.649982    11.00000    0.09169    0.19665 =
         0.05200    0.01601   -0.01099   -0.05882
C2    1    0.823418    0.732606    0.623656    11.00000    0.08013    0.16188 =
         0.05521    0.00399   -0.01192   -0.04871
AFIX  43
H2    2    0.806085    0.764964    0.626119    11.00000   -1.20000
AFIX   0
N2    3    0.863838    0.714213    0.592980    11.00000    0.07331    0.14244 =
         0.05533    0.00928   -0.01285   -0.06412
C3    1    0.845301    0.655927    0.635100    11.00000    0.07403    0.17373 =
         0.06591    0.04099   -0.01650   -0.06224
AFIX  43
H3    2    0.845588    0.625363    0.647630    11.00000   -1.20000
AFIX   0
C4    1    0.877534    0.666047    0.599638    11.00000    0.07265    0.15206 =
         0.06908    0.01820   -0.01896   -0.05752
AFIX  43
H4    2    0.904191    0.644280    0.582791    11.00000   -1.20000
AFIX   0
C5    1    0.886014    0.739078    0.557225    11.00000    0.08610    0.14153 =
         0.05811    0.01827   -0.01355   -0.06901
AFIX  23
H5A   2    0.932694    0.723339    0.545704    11.00000   -1.20000
H5B   2    0.899974    0.772822    0.563477    11.00000   -1.20000
AFIX   0
C6    1    0.820510    0.738358    0.528257    11.00000    0.05898    0.10175 =
         0.04506   -0.00529    0.00660   -0.04153
C7    1    0.778664    0.692675    0.511210    11.00000    0.08327    0.07426 =
         0.06003   -0.00055   -0.01781   -0.02726
AFIX  13
H7    2    0.790701    0.658597    0.518538    11.00000   -1.20000
AFIX   0
C8    1    0.698188    0.718618    0.517273    11.00000    0.06325    0.09917 =
         0.04664   -0.00671    0.01420   -0.04095
AFIX  13
H8    2    0.650132    0.703389    0.528573    11.00000   -1.20000
AFIX   0
C9    1    0.740250    0.763153    0.534271    11.00000    0.07756    0.10706 =
         0.05619   -0.02722    0.01375   -0.03246
AFIX  13
H9    2    0.724017    0.781223    0.558332    11.00000   -1.20000
RESI 0
AFIX   0
HKLF 4


REM  rv2045 in P2(1)/c
REM R1 =  0.1010 for   24393 Fo > 4sig(Fo)  and  0.1387 for all   37706 data
REM   2021 parameters refined using   2395 restraints

END

WGHT      0.1830     41.9234

REM Highest difference peak  2.567,  deepest hole -1.018,  1-sigma level  0.129
Q1    1   1.1347  0.9246  0.3977  11.00000  0.05    2.57
Q2    1   0.6680  0.9652  0.6736  11.00000  0.05    2.24
Q3    1   0.1339  0.9355  0.5546  11.00000  0.05    1.77
Q4    1   1.2540  0.9096  0.4646  11.00000  0.05    1.66
Q5    1   0.2292  0.9187  0.5440  11.00000  0.05    1.57
Q6    1   0.2088  0.4080  0.1721  11.00000  0.05    1.37
Q7    1   1.1990  0.9523  0.4682  11.00000  0.05    1.29
Q8    1   0.4709  0.9730  0.1209  11.00000  0.05    1.27
Q9    1   0.7480  0.7411  0.7177  11.00000  0.05    1.07
Q10   1   0.3409  0.4426  0.1873  11.00000  0.05    1.03
Q11   1   0.6682  0.4229  0.5223  11.00000  0.05    1.00
Q12   1   0.2185  0.4020  0.2521  11.00000  0.05    1.00
Q13   1   0.2670  0.4411  0.3485  11.00000  0.05    0.96
Q14   1   0.0652  0.9682  0.5556  11.00000  0.05    0.89
Q15   1   0.2562  0.3654  0.2380  11.00000  0.05    0.88
Q16   1   0.6956  1.0002  0.6268  11.00000  0.05    0.85
Q17   1   1.1708  0.5589  0.4672  11.00000  0.05    0.80
Q18   1   0.3085  0.7763  0.1060  11.00000  0.05    0.78
Q19   1   0.8487  0.5929  0.6489  11.00000  0.05    0.74
Q20   1   0.1997  0.8269  0.1129  11.00000  0.05    0.73
;
_shelx_res_checksum   33556

_shelx_hkl_file
;
   0   0  -4    0.02    0.17
   0   0  -6   15.69    1.11
   0   0  -7    1.96    0.84
   0   0  -9    3.20    1.18
   0   0 -11   11.08    1.69
   0   0 -12  751.14    8.77
   0   0 -13    0.08    1.05
   0   0 -14  635.14    8.64
   0   0 -15    0.23    1.23
   0   0 -16  220.59    5.56
   0   0 -17    0.46    1.40
   0   0 -18  153.28    4.91
   0   0 -19    0.19    1.38
   0   0 -20  461.62    9.01
   0   0 -21   -0.67    1.58
   0   0 -22    9.84    1.97
   0   0 -23    3.21    2.04
   0   0 -24   30.29    3.05
   0   0 -25    1.67    1.84
   0   0 -26  161.45    6.45
   0   0 -27   -1.04    2.13
   0   0 -28   21.23    3.12
   0   0 -29    0.23    2.35
   0   0 -30    2.07    2.26
   0   0 -31    6.23    3.15
   0   0 -32   16.45    3.32
   0   0 -33    6.75    3.10
   0   0 -34  154.21    7.36
   0   0 -35    1.93    2.92
   0   0 -36   63.14    5.38
   0   0 -37    1.20    2.88
   0   0 -38  185.55    8.85
   0   0 -39   -0.83    3.23
   0   0 -40   47.29    5.36
   0   0 -41    5.79    3.71
   0   0 -42   -3.68    3.64
   0   0 -43    2.26    3.94
   0  -1   3   -0.17    0.17
   0   1  -4   -0.14    0.17
   0  -1   4    0.73    0.37
   0  -1   5    2.60    0.57
   0  -1   6    1.56    0.69
   0   1  -6    2.00    0.68
   0   1  -8  102.42    2.74
   0  -1   8   97.81    2.70
   0  -1 -10  106.11    3.05
   0   1 -10  108.98    3.15
   0  -1  10  110.02    3.19
   0   1 -11  163.61    3.98
   0  -1 -11  168.08    3.95
   0   1 -13 1094.11   10.98
   0  -1 -13 1086.31   10.91
   0  -1 -14   10.08    1.60
   0   1 -14   11.45    1.69
   0  -1 -15   32.38    2.32
   0   1 -15   33.78    2.43
   0  -1 -16  188.60    5.25
   0   1 -16  182.80    5.22
   0  -1 -17  300.54    6.69
   0   1 -17  305.48    6.84
   0  -1 -18  363.45    7.54
   0   1 -18  364.14    7.66
   0   1 -19   71.37    3.72
   0  -1 -19   72.29    3.67
   0   1 -20  120.09    4.86
   0  -1 -20  112.87    4.61
   0  -1 -21  120.25    4.87
   0   1 -21  115.26    4.93
   0   1 -22   38.83    3.41
   0  -1 -22   36.25    3.16
   0  -1 -23   97.16    4.63
   0   1 -23  104.01    4.87
   0  -1 -24   74.69    4.42
   0   1 -24   66.77    4.18
   0   1 -25  124.92    5.56
   0  -1 -25  127.74    5.61
   0   1 -26  111.59    5.45
   0  -1 -26  109.09    5.28
   0  -1 -27    0.42    1.97
   0   1 -27    4.96    2.28
   0   1 -28   53.14    4.26
   0  -1 -28   48.38    4.03
   0  -1 -29   16.18    2.71
   0   1 -29   20.33    3.20
   0  -1 -30   55.98    4.61
   0   1 -30   49.59    4.34
   0  -1 -31    9.94    2.82
   0   1 -31    9.20    2.88
   0   1 -32   52.96    4.72
   0  -1 -32   52.77    4.66
   0  -1 -33   13.06    3.19
   0   1 -33   16.26    3.37
   0   1 -34    3.20    2.88
   0  -1 -34    4.30    2.78
   0  -1 -35   21.23    3.43
   0   1 -35   23.60    3.81
   0   1 -36    3.69    3.21
   0  -1 -36    1.51    2.80
   0   1 -37   86.37    6.12
   0  -1 -37   80.55    6.08
   0  -1 -38   25.49    4.32
   0   1 -38   32.25    4.67
   0  -1 -39   76.75    6.07
   0   1 -39   69.25    5.83
   0  -1 -40   39.29    5.31
   0   1 -40   34.99    5.03
   0  -1 -41    1.16    3.55
   0   1 -41   -5.68    4.01
   0   1 -42   -6.30    3.99
   0  -1 -42   -0.12    3.55
   0  -1 -43    5.61    3.80
   0   1 -43   10.81    4.29
   0  -2   2    0.02    0.13
   0   2   2   -0.05    0.11
   0   2  -3    0.01    0.14
   0  -2  -3   -0.74    0.29
   0  -2   5  471.77    4.66
   0   2  -5  426.96    4.45
   0   2  -6   17.71    1.17
   0  -2   6   19.84    1.30
   0   2  -7  114.01    2.73
   0  -2   7  124.22    2.89
   0  -2   9  119.50    3.19
   0   2  -9  119.51    3.17
   0  -2  10 1101.99    9.85
   0   2 -10 1108.48    9.82
   0  -2  11  426.39    6.48
   0   2 -11  419.09    6.40
   0  -2  12 1792.36   13.71
   0   2 -12 1784.69   13.68
   0   2 -13   13.12    1.70
   0  -2 -13    7.83    1.39
   0  -2  13    9.98    1.71
   0   2 -14  251.27    5.68
   0  -2 -14  250.36    5.53
   0  -2  14  252.73    5.64
   0  -2 -15   34.24    2.52
   0   2 -15   38.12    2.73
   0   2 -16 1512.25   14.52
   0  -2 -16 1540.80   14.44
   0   2 -17  230.57    5.99
   0  -2 -17  225.26    5.78
   0   2 -18   63.76    3.45
   0  -2 -18   65.96    3.41
   0   2 -19   93.87    4.17
   0  -2 -19   95.12    4.10
   0  -2 -20  531.33    9.80
   0   2 -20  547.51    9.89
   0  -2 -21   49.22    3.35
   0   2 -21   46.51    3.33
   0  -2 -22  242.90    6.90
   0   2 -22  237.69    7.00
   0   2 -23   12.65    2.29
   0  -2 -23   12.27    2.30
   0   2 -24  475.36   10.19
   0  -2 -24  480.13   10.22
   0  -2 -25   31.11    3.15
   0   2 -25   39.21    3.59
   0  -2 -26   14.56    2.56
   0   2 -26   15.74    2.62
   0   2 -27   53.07    4.10
   0  -2 -27   57.27    4.24
   0   2 -28    7.26    2.45
   0  -2 -28    3.54    2.44
   0   2 -29   96.71    5.45
   0  -2 -29  101.74    5.61
   0   2 -30  113.84    6.05
   0  -2 -30   97.72    5.51
   0   2 -31  140.53    6.77
   0  -2 -31  131.53    6.44
   0  -2 -32    8.80    3.03
   0   2 -32   10.45    3.16
   0  -2 -33    8.61    2.99
   0   2 -33    8.17    3.03
   0  -2 -34   92.18    5.98
   0   2 -34   94.91    6.12
   0   2 -35    2.58    2.92
   0  -2 -35    0.49    2.69
   0  -2 -36   20.58    3.73
   0   2 -36   21.10    3.89
   0   2 -37   17.96    3.96
   0  -2 -37   20.77    4.03
   0  -2 -38   48.46    5.26
   0   2 -38   43.38    5.08
   0  -2 -39   10.92    3.44
   0   2 -39   11.54    4.04
   0  -2 -40    3.27    3.42
   0   2 -40    2.88    3.59
   0   2 -41    3.19    3.30
   0  -2 -41    2.31    3.44
   0   2 -42   20.60    4.50
   0  -2 -42   13.45    3.50
   0   2 -43   -1.67    3.73
   0  -2 -43   -0.51    3.55
   0  -2 -44    5.77    4.12
   0  -3   0   -0.25    0.19
   0   3   0    0.04    0.13
   0   3  -1    0.07    0.12
   0  -3  -1   -0.30    0.20
   0   3   1   -0.21    0.15
   0  -3   2    2.31    0.36
   0   3  -2   -0.13    0.18
   0  -3  -3  515.75    3.95
   0  -3   3  525.11    4.31
   0   3  -4    2.23    0.58
   0  -3   4    0.76    0.51
   0  -3  -4    1.59    0.51
   0  -3  -5  967.44    6.52
   0   3  -5  983.63    6.99
   0  -3   5  967.07    6.98
   0   3  -6  152.67    3.06
   0  -3   6  153.29    3.08
   0   3  -7  120.53    2.91
   0  -3   7  124.11    2.99
   0   3  -8  128.88    3.17
   0  -3   8  137.53    3.31
   0  -3   9  335.99    5.31
   0   3  -9  303.06    4.97
   0  -3  11   77.55    2.95
   0   3 -11   81.35    3.04
   0   3 -13  901.74   10.18
   0  -3  13  919.96   10.41
   0   3 -14  453.61    7.58
   0  -3  14  458.96    7.71
   0  -3  15    1.35    1.30
   0   3 -15    2.15    1.38
   0   3 -16   11.14    1.86
   0  -3 -16   13.71    1.84
   0  -3  16   12.05    1.89
   0  -3 -17  719.99   10.28
   0  -3  17  700.30   10.46
   0   3 -17  722.37   10.46
   0  -3 -18   18.09    2.04
   0   3 -18   19.09    2.11
   0   3 -19   56.63    3.34
   0  -3 -19   56.37    3.26
   0  -3 -20  375.69    8.14
   0   3 -20  377.76    8.28
   0   3 -21  387.45    8.56
   0  -3 -21  388.42    8.48
   0   3 -22  166.72    5.90
   0  -3 -22  167.67    5.92
   0   3 -23   10.85    2.21
   0  -3 -23   13.09    2.28
   0   3 -24  117.30    5.29
   0  -3 -24  114.64    5.16
   0  -3 -25   44.20    3.53
   0   3 -25   46.92    3.70
   0   3 -26   83.96    4.86
   0  -3 -26   78.06    4.56
   0   3 -27   -0.10    2.13
   0  -3 -27    2.82    2.08
   0   3 -28    3.39    2.21
   0  -3 -28    4.64    2.30
   0  -3 -29  105.20    5.60
   0   3 -29  108.13    5.77
   0   3 -30    1.45    2.47
   0  -3 -30    2.38    2.49
   0   3 -31    5.76    2.69
   0  -3 -31    7.79    2.92
   0  -3 -32   13.39    2.96
   0   3 -32   16.84    3.20
   0  -3 -33  116.98    6.47
   0   3 -33  114.89    6.54
   0  -3 -34    5.21    2.91
   0   3 -34    3.97    2.96
   0  -3 -35    4.59    2.85
   0   3 -35   -0.86    2.89
   0   3 -36   23.99    4.06
   0  -3 -36   22.01    3.86
   0  -3 -37   11.56    3.45
   0   3 -37   11.86    3.41
   0   3 -38    5.59    3.64
   0  -3 -38    5.26    3.41
   0  -3 -39   22.30    4.18
   0   3 -39   29.05    4.53
   0   3 -40    0.02    3.26
   0  -3 -40   -1.24    3.21
   0  -3 -41   15.01    3.94
   0   3 -41   18.12    4.23
   0  -3 -42    5.17    3.82
   0   3 -42    5.29    3.83
   0   3 -43   22.93    4.89
   0  -3 -43   30.45    5.44
   0  -3 -44   -1.28    3.77
   0   4   0  463.30    3.79
   0  -4   0  605.49    4.21
   0   4   1  355.23    3.35
   0  -4  -1  370.60    3.39
   0  -4   1  365.31    3.49
   0   4  -2  350.33    3.60
   0  -4   2  348.87    3.58
   0   4   2  351.18    3.40
   0  -4  -2  358.85    3.40
   0   4  -3  962.79    6.36
   0  -4   3  952.87    6.33
   0  -4  -5   84.28    2.15
   0  -4   5  107.11    2.59
   0   4   5   79.17    2.06
   0   4  -5  106.22    2.55
   0  -4  -7  450.20    5.32
   0   4  -7  466.65    5.73
   0  -4   8  269.64    4.64
   0   4  -8  262.80    4.54
   0  -4   9    4.19    1.11
   0   4  -9    1.52    0.96
   0   4 -10  265.04    5.06
   0  -4  10  272.38    5.16
   0  -4  11  173.40    4.26
   0   4 -11  132.83    3.74
   0   4 -12 1011.72   10.69
   0  -4  12 1030.94   10.68
   0  -4  13  598.21    8.49
   0   4 -13  606.34    8.61
   0   4 -14  301.37    6.30
   0  -4  14  309.86    6.48
   0  -4  15  895.93   11.20
   0   4 -15  888.09   11.05
   0   4 -16   20.97    2.22
   0  -4  16   20.29    2.17
   0  -4  17  883.10   11.91
   0   4 -17  885.67   11.78
   0   4 -18   32.40    2.77
   0  -4 -18   27.37    2.41
   0  -4  18   31.49    2.62
   0  -4  19  217.42    6.38
   0   4 -19  217.92    6.35
   0  -4 -19  218.18    6.05
   0  -4 -20  183.22    5.81
   0   4 -20  182.87    5.98
   0  -4  20  179.90    5.98
   0   4 -21   72.36    4.04
   0  -4 -21   73.94    4.08
   0  -4 -22  397.90    8.88
   0   4 -22  415.04    9.20
   0   4 -23   74.60    4.33
   0  -4 -23   65.05    3.97
   0   4 -24   22.05    2.81
   0  -4 -24   22.48    2.76
   0   4 -25  143.76    5.99
   0  -4 -25  143.56    5.79
   0   4 -26  497.05   11.04
   0  -4 -26  506.12   10.81
   0   4 -27   77.30    4.88
   0  -4 -27   68.18    4.58
   0  -4 -28   81.97    4.97
   0   4 -28   82.68    5.10
   0  -4 -29   27.67    3.39
   0   4 -29   28.32    3.56
   0  -4 -30  273.67    8.97
   0   4 -30  297.17    9.42
   0   4 -31   18.72    3.56
   0  -4 -31   12.91    2.95
   0  -4 -32    4.14    2.66
   0   4 -32   10.26    2.88
   0  -4 -33   16.49    3.45
   0   4 -33   13.53    3.57
   0   4 -34    7.54    3.03
   0  -4 -34    5.75    2.81
   0   4 -35   17.67    3.94
   0  -4 -35   18.04    3.67
   0  -4 -36   47.69    4.91
   0   4 -36   45.72    4.78
   0   4 -37   -2.32    3.11
   0  -4 -37    0.29    3.00
   0  -4 -38    2.13    3.45
   0   4 -38   -2.50    3.11
   0  -4 -39    5.25    3.52
   0   4 -39    4.98    3.68
   0  -4 -40    6.42    3.81
   0   4 -40    1.76    3.23
   0  -4 -41   -0.45    3.20
   0   4 -41    1.62    3.34
   0   4 -42   20.59    4.57
   0  -4 -42   13.69    3.99
   0  -4 -43    1.05    3.76
   0  -4 -44    2.51    4.04
   0   5   0    3.16    0.66
   0  -5   0    2.59    0.65
   0  -5   1  366.91    3.85
   0   5  -1  358.55    3.87
   0   5   1  353.76    3.74
   0  -5  -1  361.80    3.71
   0  -5  -2  116.55    2.21
   0  -5   2  109.96    2.28
   0   5  -2  108.06    2.26
   0   5   2  112.98    2.22
   0  -5   3    6.28    0.89
   0   5  -3    6.91    0.91
   0  -5  -3    8.27    0.86
   0   5   3    8.35    0.84
   0  -5   4  644.87    5.95
   0   5   4  650.40    5.63
   0   5  -4  642.21    5.97
   0  -5  -4  658.34    5.57
   0   5  -5  973.00    7.64
   0  -5   5  962.37    7.59
   0  -5  -5  926.41    6.92
   0   5   5  899.32    6.97
   0  -5  -6    0.43    0.79
   0   5  -6    0.84    0.78
   0   5   6    2.07    0.76
   0  -5   6   -0.04    0.80
   0  -5   7    5.80    1.13
   0   5  -7    6.04    1.11
   0  -5   8   57.58    2.29
   0   5  -8   59.10    2.32
   0  -5  -9  207.45    4.21
   0  -5   9  192.43    4.29
   0  -5  10 1465.21   12.06
   0   5 -10 1408.34   11.69
   0   5 -11 1170.90   11.05
   0  -5  11 1195.43   11.41
   0  -5  12   80.58    3.25
   0   5 -12   75.01    3.09
   0   5 -13 2012.41   15.88
   0  -5  13 2894.72   18.61
   0  -5  14  121.18    4.19
   0   5 -14  125.40    4.36
   0   5 -15  416.09    7.83
   0  -5  15  415.78    7.74
   0   5 -16    5.20    1.52
   0  -5  16    5.95    1.72
   0   5 -17    1.92    1.45
   0  -5  17    4.46    1.59
   0   5 -18   12.61    1.99
   0  -5  18   10.57    1.98
   0  -5  19   62.24    3.73
   0   5 -19   61.35    3.62
   0  -5  20    6.55    2.13
   0   5 -20    4.94    1.91
   0  -5 -20    4.06    1.74
   0  -5  21   13.38    2.20
   0   5 -21   16.78    2.32
   0  -5 -21   15.35    2.23
   0  -5  22   57.31    3.92
   0  -5 -22   57.44    3.65
   0   5 -22   54.30    3.72
   0  -5 -23   24.03    2.81
   0   5 -23   22.50    2.73
   0  -5 -24    3.47    1.99
   0   5 -24    4.43    1.90
   0  -5 -25    8.91    2.42
   0   5 -25   13.42    2.65
   0  -5 -26   22.68    3.03
   0   5 -26   24.71    3.05
   0  -5 -27  125.84    5.83
   0   5 -27  124.15    5.99
   0   5 -28   27.12    3.62
   0  -5 -28   21.91    3.22
   0   5 -29    9.63    2.82
   0  -5 -29   11.19    2.79
   0   5 -30   21.56    3.32
   0  -5 -30   27.97    3.52
   0  -5 -31   19.01    3.18
   0   5 -31   17.53    3.53
   0  -5 -32    4.61    2.82
   0   5 -32    5.55    2.91
   0   5 -33   74.11    5.59
   0  -5 -33   73.26    5.37
   0   5 -34   18.95    3.75
   0  -5 -34   15.09    3.35
   0  -5 -35   67.27    5.35
   0   5 -35   65.02    5.20
   0   5 -36    1.99    2.86
   0  -5 -36    3.80    3.40
   0  -5 -37   -1.42    2.79
   0   5 -37    0.62    2.98
   0  -5 -38    1.52    3.06
   0   5 -38   -1.47    3.14
   0   5 -39   -2.97    3.25
   0  -5 -39    1.08    3.02
   0  -5 -40    4.81    3.25
   0   5 -40   -0.38    3.34
   0  -5 -41   18.77    4.24
   0   5 -41   19.66    4.44
   0   5 -42    1.86    3.76
   0  -5 -42    1.09    3.45
   0  -5 -43   17.93    4.71
   0  -5 -44   -0.39    3.94
   0   6   1   88.79    2.20
   0  -6   1   96.38    2.25
   0  -6  -1   95.48    2.21
   0   6  -1   94.68    2.26
   0  -6   2  237.59    3.54
   0  -6  -2  234.41    3.34
   0   6  -2  233.56    3.53
   0   6   2  226.44    3.37
   0  -6   3 1645.16    9.60
   0   6   5  863.76    7.23
   0  -6  -5  865.44    7.03
   0  -6   5  857.71    7.54
   0   6  -5  856.66    7.57
   0  -6   6 2238.86   12.72
   0  -6  -7    4.23    0.97
   0  -6   7    6.86    1.10
   0   6   7    3.87    0.96
   0   6  -7    8.12    1.20
   0   6  -9  126.05    3.58
   0  -6  -9  133.64    3.39
   0  -6   9  131.73    3.67
   0   6 -10   17.49    1.70
   0  -6  10   19.69    1.77
   0   6 -11 1521.33   12.96
   0  -6 -11 1591.83   12.48
   0   6 -12  557.62    8.13
   0  -6  12  574.82    8.31
   0   6 -13  152.33    4.52
   0  -6  13  160.33    4.69
   0   6 -14   80.83    3.47
   0  -6  14   85.78    3.63
   0  -6  15   57.96    3.25
   0   6 -15   41.05    2.75
   0  -6  16  129.62    4.64
   0   6 -16  139.67    4.80
   0  -6  17    6.14    1.80
   0   6 -17    4.91    1.68
   0   6 -18   31.03    2.94
   0  -6  18   34.34    3.00
   0   6 -19   47.36    3.37
   0  -6  19   46.25    3.33
   0  -6  20   17.86    2.32
   0   6 -20   17.52    2.36
   0   6 -21  379.29    8.86
   0  -6  21  359.58    8.77
   0  -6 -22   72.43    4.10
   0   6 -22   77.17    4.30
   0  -6  22   76.14    4.30
   0  -6 -23    0.60    1.68
   0  -6  23    3.53    1.88
   0   6 -23    4.94    2.07
   0  -6 -24  412.64    9.51
   0   6 -24  438.72   10.11
   0  -6 -25   33.41    3.25
   0   6 -25   41.53    3.60
   0  -6 -26  237.67    7.62
   0   6 -26  236.97    7.88
   0  -6 -27    4.74    2.37
   0   6 -27    2.50    2.26
   0  -6 -28   -1.32    2.22
   0   6 -28    2.01    2.17
   0   6 -29   26.56    3.58
   0  -6 -29   33.79    3.81
   0  -6 -30   80.07    5.16
   0   6 -30   75.76    5.06
   0  -6 -31   49.88    4.45
   0   6 -31   48.48    4.38
   0  -6 -32    0.42    2.69
   0   6 -32   -0.83    2.74
   0  -6 -33   -0.09    2.68
   0   6 -33   -1.12    2.86
   0   6 -34   93.84    6.12
   0  -6 -34   84.53    5.59
   0   6 -35   14.42    3.72
   0  -6 -35   12.43    3.46
   0   6 -36    4.46    3.09
   0  -6 -36    4.10    2.95
   0  -6 -37   11.48    3.62
   0   6 -37   12.35    3.72
   0   6 -38   -1.13    3.01
   0  -6 -38   -6.44    3.34
   0   6 -39    7.47    3.51
   0  -6 -39    1.48    2.99
   0   6 -40    2.80    3.31
   0  -6 -40    4.43    3.57
   0   6 -41    4.50    3.61
   0  -6 -41    3.25    3.76
   0   6 -42   14.48    4.12
   0  -6 -42   18.73    4.47
   0  -6 -43    3.86    3.80
   0  -7   0    2.50    0.79
   0   7   0    1.37    0.75
   0  -7  -1   17.11    1.15
   0   7   1   18.25    1.18
   0   7  -1   16.81    1.12
   0  -7   1   18.06    1.23
   0   7  -2  436.61    5.12
   0   7   2  444.68    5.04
   0  -7   2  452.00    5.18
   0  -7  -2  440.97    4.90
   0   7   3 1195.23    8.31
   0  -7  -3 1238.64    8.25
   0   7  -3 1207.43    8.65
   0  -7   3 1210.07    8.67
   0   7  -4  471.51    5.65
   0   7   4  464.62    5.34
   0  -7   4  452.85    5.56
   0  -7  -4  462.05    5.23
   0  -7  -5 1688.29   10.22
   0   7   5 1689.72   10.43
   0   7  -5 1677.11   11.01
   0  -7   5 1685.47   11.12
   0   7  -6  401.11    5.69
   0  -7  -6  412.52    5.32
   0   7   6  409.18    5.46
   0  -7   6  405.45    5.68
   0  -7   7  277.06    4.98
   0  -7  -7  267.97    4.52
   0   7   7  277.26    4.62
   0   7  -7  262.46    4.81
   0   7  -8  473.68    6.67
   0  -7   8  477.18    6.76
   0  -7  -8  450.57    6.05
   0   7  -9 1180.28   10.87
   0  -7  -9 1166.52   10.16
   0   7 -10 1784.01   13.84
   0  -7  10 1848.59   14.09
   0   7 -11  264.79    5.56
   0  -7  11  260.29    5.64
   0   7 -12  102.86    3.68
   0  -7  12  105.05    3.84
   0   7 -13  316.12    6.46
   0  -7 -13  357.51    6.49
   0   7 -14  336.40    6.90
   0  -7 -14  347.13    6.59
   0  -7  14  346.95    7.13
   0   7 -15  203.64    5.57
   0  -7  15  204.33    5.67
   0  -7  16  336.07    7.39
   0   7 -16  355.64    7.55
   0  -7  17  652.60   10.58
   0   7 -17  402.52    8.26
   0   7 -18  465.14    9.13
   0  -7  18  470.89    9.19
   0   7 -19  226.00    6.64
   0  -7  19  227.89    6.76
   0   7 -20   43.09    3.37
   0  -7  20   40.46    3.25
   0  -7  21  282.99    7.83
   0   7 -21  292.48    7.81
   0   7 -22   97.25    4.77
   0  -7  22   95.52    4.83
   0  -7  23   22.13    2.77
   0   7 -23   22.63    2.75
   0  -7  24   85.98    4.94
   0  -7 -24   87.38    4.64
   0   7 -24   85.00    4.72
   0  -7 -25   82.42    4.54
   0   7 -25   79.49    4.70
   0  -7  25   78.08    4.80
   0  -7 -26  159.71    6.43
   0   7 -26  167.10    6.75
   0   7 -27   96.99    5.40
   0  -7 -27   93.02    5.20
   0   7 -28   35.04    3.81
   0  -7 -28   33.86    3.66
   0   7 -29   40.31    4.09
   0  -7 -29   34.59    3.77
   0   7 -30    5.71    2.92
   0  -7 -30    2.01    2.37
   0   7 -31   68.81    5.19
   0  -7 -31   70.57    5.16
   0   7 -32   14.60    3.21
   0  -7 -32   16.28    3.24
   0   7 -33   41.99    4.51
   0  -7 -33   40.83    4.19
   0   7 -34    2.40    2.74
   0  -7 -34    3.92    3.00
   0  -7 -35   61.98    5.26
   0   7 -35   67.81    5.58
   0   7 -36    8.70    3.44
   0  -7 -36    9.75    3.49
   0   7 -37   -4.77    3.30
   0  -7 -37    0.32    3.06
   0   7 -38   11.53    3.93
   0  -7 -38   10.74    3.74
   0  -7 -39   19.46    4.08
   0   7 -39   13.34    3.83
   0  -7 -40    2.93    3.26
   0   7 -40    3.55    3.29
   0  -7 -41    6.08    3.80
   0   7 -41    5.75    3.45
   0  -7 -42    4.75    4.10
   0   7 -42    8.16    4.42
   0  -7 -43   34.91    5.35
   0  -7 -44   -3.47    4.32
   0  -8   0   37.42    1.69
   0   8   0   36.14    1.74
   0  -8  -1 1957.68   10.84
   0  -8   1 1931.92   11.00
   0  -8  -2  544.03    5.75
   0   8  -2  524.41    5.98
   0  -8   2  523.62    5.89
   0   8   2  552.57    5.96
   0  -8   3    3.95    0.96
   0  -8  -3    4.10    0.90
   0   8  -3    4.31    0.95
   0   8   3    4.23    0.92
   0   8  -5   94.34    2.87
   0  -8  -5  100.21    2.77
   0  -8   5   97.79    2.90
   0   8   5  103.28    2.80
   0  -8  -6   17.17    1.46
   0  -8   6   22.11    1.72
   0   8   6   19.63    1.55
   0   8  -6   18.67    1.58
   0  -8   7  169.59    4.06
   0   8  -7  172.30    4.06
   0   8   7  177.85    3.94
   0  -8  -7  175.35    3.85
   0  -8  -8 1354.54   10.66
   0   8  -8 1317.79   11.29
   0  -8   8 1324.14   11.54
   0  -8  -9  556.11    7.19
   0   8  -9  585.02    7.87
   0   8 -10 1254.55   11.81
   0  -8  10 1262.76   11.93
   0  -8 -10 1292.53   11.07
   0  -8 -11    0.47    1.10
   0  -8  11    3.90    1.35
   0   8 -11    1.29    1.09
   0  -8 -12   67.55    2.96
   0   8 -12   64.71    3.04
   0  -8  12   63.86    3.04
   0  -8 -13   87.80    3.43
   0   8 -13   81.61    3.54
   0  -8  13   77.39    3.48
   0  -8  14   25.30    2.37
   0  -8 -14   24.92    2.09
   0   8 -14   26.24    2.27
   0  -8 -15  411.17    7.52
   0   8 -15  433.19    8.05
   0   8 -16    8.44    1.73
   0  -8  16    7.47    1.65
   0  -8 -16   10.78    1.73
   0  -8  17  144.39    5.14
   0  -8 -17  135.26    4.68
   0   8 -17  144.21    5.14
   0  -8  18    7.59    1.91
   0  -8 -18    5.07    1.68
   0   8 -18    4.43    1.65
   0   8 -19   -0.58    1.49
   0  -8 -19    2.07    1.52
   0  -8  20   32.75    3.17
   0  -8 -20   23.91    2.58
   0   8 -20   29.57    2.93
   0  -8  21    6.40    2.20
   0  -8 -21    4.93    1.69
   0   8 -21    4.72    1.84
   0  -8  22   19.32    2.61
   0   8 -22   21.31    2.83
   0   8 -23  154.10    6.11
   0  -8  23  143.94    6.04
   0  -8  24   89.62    5.09
   0   8 -24   92.26    4.96
   0  -8  25  169.09    6.83
   0   8 -25  163.36    6.54
   0  -8 -25  173.13    6.33
   0   8 -26  148.68    6.41
   0  -8 -26  157.43    6.43
   0  -8  26  152.24    6.77
   0   8 -27   20.59    3.09
   0  -8 -27   16.67    2.86
   0   8 -28   30.00    3.53
   0  -8 -28   27.57    3.37
   0  -8 -29   28.86    3.57
   0   8 -29   30.67    3.73
   0   8 -30  168.42    7.42
   0  -8 -30  171.18    7.21
   0  -8 -31   12.42    3.10
   0   8 -31   17.06    3.35
   0   8 -32   26.80    3.82
   0  -8 -32   24.26    3.66
   0  -8 -33   68.63    5.05
   0   8 -33   70.65    5.57
   0  -8 -34   71.50    5.39
   0   8 -34   72.66    5.57
   0   8 -35   20.91    3.96
   0  -8 -35   29.52    4.20
   0  -8 -36   10.25    3.19
   0   8 -36   12.50    3.64
   0  -8 -37    2.57    3.32
   0   8 -37    1.67    3.04
   0  -8 -38   25.26    4.13
   0   8 -38   31.48    4.64
   0  -8 -38   34.31    4.52
   0   8 -39    6.56    3.66
   0  -8 -39    2.06    3.27
   0  -8 -39    2.01    3.13
   0  -8 -40    1.93    3.18
   0   8 -40    2.67    3.69
   0   8 -41    4.82    3.62
   0  -8 -41    5.23    3.58
   0  -8 -42   22.77    4.70
   0  -8 -44    2.73    3.82
   0   9   0    4.97    1.11
   0  -9   0    5.20    1.12
   0   9  -1   25.12    1.58
   0  -9   1   25.06    1.59
   0  -9  -1   23.90    1.48
   0   9   1   26.76    1.64
   0   9   2 1276.95    9.59
   0   9  -2 1280.94    9.72
   0  -9   2 1294.91    9.79
   0  -9  -2 1318.68    9.68
   0   9  -3  122.34    3.21
   0  -9  -3  122.84    3.07
   0   9   3  123.31    3.12
   0  -9   3  122.98    3.20
   0  -9  -4 1727.12   11.17
   0  -9   4 1757.23   11.99
   0   9   4 1692.58   11.33
   0   9  -4 1712.34   11.86
   0   9  -5  242.27    4.68
   0  -9  -5  238.16    4.33
   0  -9   5  257.12    4.81
   0  -9  -6  186.24    3.95
   0  -9   6  184.45    4.25
   0   9   6  188.05    4.03
   0   9  -6  183.95    4.19
   0  -9  -7    5.30    1.14
   0   9   7    5.21    1.15
   0  -9   7    5.24    1.22
   0   9  -7    6.06    1.28
   0   9   8  375.46    5.88
   0  -9   8  361.23    6.26
   0  -9  -8  361.63    5.78
   0   9  -8  361.73    6.19
   0   9   9  210.70    4.55
   0   9  -9  194.04    4.68
   0  -9   9  185.30    4.67
   0  -9  -9  204.84    4.46
   0  -9 -10   56.53    2.59
   0   9 -10   56.03    2.77
   0  -9  10   61.17    2.98
   0   9 -11   74.78    3.25
   0  -9  11   83.28    3.45
   0  -9  12   11.45    1.74
   0   9 -12   12.65    1.70
   0   9 -13   20.94    2.06
   0  -9  13   19.65    2.09
   0  -9 -14  432.92    7.59
   0   9 -14  406.69    7.86
   0  -9  14  411.42    8.04
   0  -9  15   40.91    2.99
   0   9 -15   42.14    2.99
   0  -9 -15   32.50    2.38
   0   9 -16  583.97    9.91
   0  -9  16  578.68   10.13
   0  -9 -17 1934.35   17.17
   0   9 -17 1982.43   18.43
   0  -9  18  234.71    6.77
   0  -9 -18  256.26    6.58
   0   9 -18  253.92    6.95
   0  -9  19   34.12    3.02
   0  -9 -19   32.60    2.83
   0   9 -19   30.96    2.82
   0   9 -20    0.92    1.79
   0  -9  20    2.21    1.75
   0  -9 -20    0.59    1.48
   0  -9 -21  114.92    4.95
   0  -9  21  105.92    5.13
   0   9 -22   58.11    3.94
   0  -9 -22   56.01    3.67
   0  -9  22   62.67    4.22
   0   9 -23   13.98    2.57
   0  -9  23   13.38    2.52
   0  -9 -23    8.05    2.08
   0  -9  24   52.34    4.12
   0   9 -24   50.33    3.94
   0  -9 -24   53.16    3.82
   0  -9 -25  140.49    5.90
   0   9 -25  145.27    6.30
   0  -9  25  144.34    6.40
   0  -9 -26    4.98    2.17
   0  -9 -26    2.12    2.07
   0  -9  26    4.07    2.40
   0   9 -26    1.23    2.06
   0  -9 -27   42.38    3.86
   0   9 -27   32.98    3.68
   0  -9 -27   41.74    3.92
   0  -9  27   32.45    3.73
   0  -9  28   42.83    4.26
   0   9 -28   39.50    3.94
   0  -9 -28   37.89    3.64
   0  -9 -28   37.09    3.84
   0  -9 -29  160.56    6.86
   0  -9 -29  147.33    6.69
   0   9 -29  152.10    6.99
   0  -9 -30   10.74    2.94
   0   9 -30   18.12    3.44
   0  -9 -30   16.36    3.21
   0   9 -31   61.84    5.23
   0  -9 -31   57.91    4.69
   0  -9 -31   55.30    4.60
   0  -9 -32    3.73    2.88
   0   9 -32    3.38    2.89
   0  -9 -32    2.16    2.57
   0  -9 -33    5.39    2.80
   0   9 -33    2.66    2.92
   0  -9 -33    4.47    2.72
   0  -9 -34    2.97    2.57
   0   9 -34    6.83    3.22
   0  -9 -34    4.57    2.62
   0  -9 -35   -1.32    2.79
   0  -9 -35   -0.27    2.90
   0   9 -35   -0.19    2.76
   0  -9 -36    5.70    3.08
   0   9 -36    0.56    2.97
   0  -9 -36    7.51    3.12
   0  -9 -37   42.34    4.81
   0   9 -37   48.76    5.17
   0  -9 -38    5.00    3.51
   0  -9 -38    1.60    3.34
   0   9 -38    2.29    3.30
   0  -9 -39   16.16    4.17
   0  -9 -39    9.35    3.64
   0   9 -39   12.33    4.03
   0   9 -40   16.24    4.31
   0  -9 -40    9.73    3.88
   0   9 -41    8.03    4.03
   0  -9 -41    9.80    3.87
   0  -9 -42    3.64    3.74
   0  -9 -43   14.71    4.74
   0  -9 -44    7.45    4.68
   0 -10   0   25.95    1.65
   0  10   0   26.03    1.66
   0 -10  -1  227.13    4.23
   0  10   1  217.92    4.27
   0 -10   1  230.39    4.37
   0  10  -1  226.15    4.41
   0  10  -2  650.69    7.31
   0 -10   2  639.22    7.27
   0 -10  -2  644.82    7.05
   0  10   2  654.61    7.23
   0 -10  -3   24.37    1.64
   0  10  -3   22.36    1.72
   0 -10   3   21.74    1.70
   0  10   3   28.15    1.79
   0  10   4   64.12    2.45
   0  10  -4   65.08    2.56
   0 -10  -4   61.60    2.38
   0 -10   4   70.19    2.73
   0  10  -5   59.36    2.51
   0 -10   5   60.43    2.59
   0  10   5   67.76    2.55
   0 -10  -5   64.52    2.43
   0  10  -6 1491.41   12.07
   0 -10  -6 1474.44   11.17
   0  10   6 1465.05   11.31
   0  10   7   28.28    1.81
   0  10  -7   33.28    2.10
   0 -10   7   34.24    2.19
   0 -10  -7   30.65    1.91
   0 -10   8  713.40    9.01
   0  10   8  698.57    8.26
   0  10  -8  709.05    8.84
   0 -10  -8  691.40    8.11
   0 -10   9 1002.71   10.96
   0  10  -9 1001.49   10.84
   0 -10  -9 1000.34   10.00
   0  10   9 1012.97   10.30
   0  10 -10  498.86    7.87
   0  10  10  483.77    7.33
   0 -10 -10  484.70    7.16
   0 -10  10  503.86    8.05
   0 -10 -11   19.08    1.86
   0  10 -11   20.36    2.02
   0 -10  11   21.99    2.17
   0 -10 -12  166.03    4.53
   0  10 -12  167.33    4.90
   0 -10  12  178.68    5.15
   0 -10 -13  120.28    4.02
   0 -10  13  131.64    4.64
   0  10 -13  133.65    4.50
   0 -10  14    5.70    1.49
   0  10 -14    6.17    1.52
   0  10 -15  327.39    7.37
   0 -10  15  319.40    7.48
   0 -10 -16   34.59    2.57
   0  10 -16   33.22    2.76
   0 -10  16   32.35    2.76
   0 -10 -17    8.58    1.68
   0 -10  17    7.67    1.92
   0  10 -17    9.68    1.89
   0 -10  18  164.45    5.93
   0  10 -18  151.08    5.54
   0 -10  19  109.11    4.96
   0 -10 -19  117.93    4.74
   0  10 -19  120.49    5.14
   0 -10 -20  490.17    9.57
   0  10 -20  450.37    9.74
   0  10 -21  183.29    6.49
   0 -10 -21  192.66    6.23
   0 -10  21  179.14    6.58
   0 -10  22   77.32    4.58
   0  10 -22   80.55    4.51
   0 -10 -22   83.56    4.39
   0 -10  23  111.35    5.56
   0 -10 -23   99.72    4.91
   0  10 -24  356.56    9.47
   0 -10  24  368.13    9.88
   0 -10 -25    7.31    2.32
   0  10 -25   13.44    2.91
   0 -10  25   13.68    2.80
   0 -10  26   73.48    5.05
   0  10 -26   64.98    4.59
   0 -10 -27   37.16    3.64
   0 -10  27   45.72    4.34
   0  10 -27   41.19    4.06
   0  10 -28  113.50    6.16
   0 -10  28  113.23    6.20
   0 -10 -28  114.42    5.80
   0 -10 -28  110.15    5.62
   0  10 -29   15.66    3.23
   0 -10  29   13.58    3.13
   0 -10 -29   14.74    3.11
   0 -10 -29   15.96    3.21
   0 -10 -30  106.11    5.93
   0 -10 -30  111.17    6.01
   0  10 -30  103.74    5.98
   0  10 -31    9.87    2.92
   0 -10 -31    5.61    2.65
   0 -10 -31    2.61    2.54
   0  10 -32    7.46    3.13
   0 -10 -32    4.43    2.79
   0 -10 -32   -1.13    2.67
   0  10 -33   23.80    3.91
   0 -10 -33   18.69    3.42
   0 -10 -33   19.09    3.64
   0 -10 -34   30.92    4.25
   0 -10 -34   30.57    4.14
   0  10 -34   24.98    4.03
   0 -10 -35   -0.61    2.72
   0  10 -35    4.53    3.25
   0 -10 -35    0.58    2.90
   0 -10 -36   30.30    4.30
   0  10 -36   30.88    4.41
   0 -10 -36   35.23    4.50
   0 -10 -37    0.88    3.08
   0  10 -37    4.88    3.48
   0 -10 -37    1.81    3.20
   0  10 -38   74.25    6.31
   0 -10 -38   65.49    5.79
   0 -10 -38   78.59    6.36
   0  10 -39    1.95    3.32
   0 -10 -39    0.12    3.31
   0 -10 -39    3.60    3.54
   0 -10 -40    7.62    3.79
   0  10 -40    3.99    3.62
   0 -10 -41    4.51    4.02
   0 -10 -43    0.85    3.81
   0 -11   0    0.21    0.92
   0  11   0    0.46    0.89
   0  11   1  133.98    3.47
   0  11  -1  129.08    3.47
   0 -11  -1  128.66    3.38
   0 -11   1  129.34    3.45
   0 -11  -2   -0.16    0.87
   0  11  -2    0.54    0.91
   0 -11   2    0.66    0.95
   0  11   2    1.30    0.95
   0 -11   3   39.97    2.13
   0  11  -3   37.97    2.04
   0 -11  -3   39.33    2.01
   0  11   3   37.50    1.96
   0 -11  -4   10.19    1.31
   0  11  -4    9.75    1.37
   0 -11   4    9.93    1.44
   0  11   4   10.46    1.27
   0 -11   5    4.34    1.24
   0 -11  -5    5.88    1.17
   0  11  -5    6.62    1.30
   0  11   5    6.73    1.31
   0 -11  -6   37.38    2.09
   0 -11   6   35.16    2.22
   0  11  -6   32.46    2.14
   0  11   7  988.41    9.95
   0 -11  -7  959.61    9.62
   0  11  -7  968.50   10.38
   0 -11   7  952.13   10.43
   0 -11   8   -0.04    1.10
   0  11   8    5.08    1.29
   0 -11  -8    3.80    1.14
   0  11  -8    0.70    1.10
   0 -11  -9  634.13    8.20
   0 -11   9  603.22    8.77
   0  11  -9  624.87    8.77
   0 -11 -10   23.34    1.93
   0 -11  10   20.24    2.01
   0  11 -10   21.21    2.01
   0  11  10   23.95    1.95
   0 -11 -11   60.74    2.88
   0  11  11   56.26    2.98
   0  11 -11   57.44    3.03
   0 -11  11   58.55    3.20
   0 -11  12   52.76    3.08
   0  11 -12   53.42    3.00
   0  11 -13   11.07    1.70
   0 -11  13   10.40    1.93
   0 -11 -14  188.52    5.26
   0  11 -14  197.61    5.76
   0 -11  14  205.78    6.09
   0  11 -15  269.64    6.82
   0 -11 -15  269.02    6.32
   0 -11  15  265.45    6.88
   0 -11  16   13.81    2.30
   0 -11 -16   15.99    1.91
   0  11 -16   13.37    2.01
   0 -11  17  386.66    8.72
   0 -11 -17  378.09    7.92
   0  11 -17  379.45    8.46
   0 -11  18   90.31    4.56
   0  11 -18   84.60    4.29
   0 -11 -18   76.77    3.91
   0 -11 -19   38.13    3.09
   0  11 -19   47.53    3.49
   0 -11  19   50.69    3.80
   0  11 -20   67.45    4.06
   0 -11  20   65.49    4.14
   0 -11 -20   60.55    3.71
   0 -11  21   67.92    4.29
   0  11 -21   76.36    4.40
   0 -11 -21   70.49    3.98
   0  11 -22   -0.15    1.83
   0 -11  22    1.13    2.10
   0 -11 -22    3.26    1.91
   0  11 -23   68.80    4.47
   0 -11  23   70.07    4.61
   0 -11 -23   66.00    4.18
   0 -11 -24   90.86    4.89
   0  11 -24   87.70    5.13
   0 -11  24   93.20    5.41
   0 -11 -25   38.84    3.63
   0 -11  25   32.21    3.54
   0  11 -25   29.87    3.35
   0 -11 -26   47.21    3.84
   0 -11  26   46.84    4.18
   0  11 -26   49.29    4.18
   0 -11 -27    3.23    2.27
   0  11 -27    5.28    2.61
   0 -11  27    6.55    2.70
   0 -11 -28    7.19    2.56
   0  11 -28    4.21    2.53
   0 -11  28    2.07    2.40
   0  11 -29   39.24    4.25
   0 -11  29   25.27    3.83
   0 -11 -29   31.68    3.80
   0 -11 -29   35.56    3.80
   0  11 -30   -3.85    2.74
   0 -11 -30   -0.07    2.43
   0 -11  30    0.50    2.64
   0 -11 -30    0.77    2.44
   0 -11 -31   33.03    3.92
   0 -11 -31   35.74    3.91
   0  11 -31   34.13    4.02
   0  11 -32    7.61    3.01
   0 -11 -32    5.33    2.80
   0 -11 -32    7.55    3.03
   0  11 -33    6.38    3.12
   0 -11 -33    4.50    2.73
   0 -11 -33   -0.02    2.71
   0 -11 -34   29.46    3.96
   0  11 -34   26.89    4.04
   0 -11 -34   32.70    4.21
   0  11 -35    5.97    2.94
   0 -11 -35    8.46    3.35
   0 -11 -35   11.09    3.45
   0 -11 -36   22.68    4.00
   0  11 -36   26.17    4.21
   0 -11 -36   27.75    4.47
   0 -11 -37   66.00    5.58
   0 -11 -37   76.58    6.25
   0  11 -37   66.27    5.94
   0 -11 -38   -0.47    3.13
   0  11 -38    7.30    3.79
   0 -11 -38    2.33    3.41
   0 -11 -39   31.39    4.63
   0  11 -39   27.64    4.72
   0 -11 -39   23.64    3.99
   0 -11 -40    2.14    3.53
   0  11 -40    6.89    3.80
   0 -11 -41    5.38    3.83
   0 -11 -42    0.32    3.70
   0 -11 -43    2.99    3.83
   0 -12   0 2573.71   15.49
   0  12   1  113.32    3.49
   0 -12   1  107.92    3.40
   0  12  -1  108.71    3.40
   0 -12  -1  111.58    3.35
   0 -12   2   65.11    2.73
   0  12   2   59.02    2.55
   0  12  -2   56.71    2.56
   0 -12  -2   59.29    2.52
   0  12  -3   23.76    1.85
   0 -12  -3   24.23    1.76
   0 -12   3   26.30    1.94
   0  12   3   24.28    1.79
   0 -12  -4  334.50    5.64
   0  12  -4  323.45    5.90
   0  12   4  330.47    5.80
   0 -12   4  314.47    5.86
   0 -12   5  186.57    4.65
   0  12  -5  186.75    4.64
   0  12   5  190.75    4.46
   0 -12   6    3.37    1.40
   0  12  -6    4.15    1.26
   0 -12  -6    2.96    1.11
   0  12   6    3.66    1.17
   0  12   7    5.11    1.22
   0  12  -7    6.30    1.43
   0 -12   7    5.37    1.39
   0 -12  -7    6.40    1.31
   0  12  -8  319.77    6.38
   0  12   8  309.82    6.04
   0 -12   8  332.46    6.54
   0 -12  -8  314.04    5.89
   0  12  -9   59.08    2.99
   0 -12  -9   59.80    2.80
   0 -12   9   55.29    2.96
   0  12   9   63.87    2.98
   0  12 -10  102.64    3.84
   0 -12 -10   99.59    3.53
   0 -12  10  106.68    4.04
   0  12  10   94.47    3.52
   0  12  11   -0.39    1.14
   0 -12  11   -0.43    1.29
   0 -12 -11   -0.59    1.21
   0  12 -11   -0.52    1.27
   0  12 -12  404.96    7.85
   0 -12  12  402.80    8.03
   0 -12 -12  404.01    7.21
   0 -12 -13  345.18    6.86
   0 -12  13  329.72    7.48
   0  12 -13  322.97    7.24
   0 -12  14  339.30    7.75
   0  12 -14  335.06    7.55
   0 -12 -14  349.76    7.09
   0 -12  15  590.01   10.34
   0  12 -15  592.55   10.16
   0 -12  16   15.02    2.17
   0 -12 -16   20.77    2.17
   0  12 -16   15.53    2.21
   0 -12  17  190.44    6.33
   0  12 -17  197.89    6.28
   0 -12 -17  205.77    5.92
   0  12 -18  143.02    5.46
   0 -12 -18  136.64    4.98
   0 -12  18  148.97    5.71
   0 -12 -19   94.93    4.40
   0  12 -19  102.47    4.80
   0 -12  19  103.97    4.99
   0  12 -20  105.36    5.00
   0 -12 -20  112.77    4.92
   0 -12  20  103.24    5.18
   0 -12  21   27.15    3.14
   0  12 -21   29.68    3.20
   0 -12  22    5.58    2.21
   0  12 -22    9.71    2.46
   0 -12  23    8.98    2.78
   0 -12 -23    6.19    2.26
   0  12 -23    6.60    2.47
   0 -12  24   49.63    4.29
   0 -12 -24   43.06    3.70
   0  12 -24   51.84    4.18
   0  12 -25   63.68    4.46
   0 -12  25   65.49    4.80
   0 -12 -25   60.66    4.28
   0 -12  26    3.33    2.54
   0 -12 -26    7.72    2.57
   0  12 -26    3.54    2.17
   0 -12  27  123.42    6.56
   0 -12 -27  106.41    5.57
   0  12 -27  109.07    5.83
   0  12 -28    2.75    2.43
   0 -12  28    2.54    2.81
   0 -12 -28   -0.32    2.23
   0  12 -29    7.64    3.05
   0 -12  29    3.91    2.65
   0 -12 -29    8.68    2.77
   0 -12  30   54.17    4.95
   0  12 -30   57.92    4.89
   0 -12 -30   52.93    4.52
   0 -12 -30   56.61    4.60
   0 -12 -31    8.23    2.96
   0  12 -31    9.87    3.26
   0 -12  31    7.48    3.15
   0 -12 -31    7.91    2.84
   0 -12 -32   -1.89    2.86
   0  12 -32   -1.66    2.89
   0 -12 -32   -0.21    2.62
   0 -12 -33   43.93    4.64
   0  12 -33   43.59    4.91
   0 -12 -33   40.44    4.42
   0  12 -34    1.05    2.89
   0 -12 -34    5.72    3.07
   0 -12 -34    3.80    2.89
   0 -12 -35    7.63    3.53
   0  12 -35    1.59    2.90
   0 -12 -35    2.69    2.90
   0 -12 -36    1.40    3.19
   0  12 -36    4.92    3.57
   0 -12 -36    0.49    2.89
   0 -12 -37    6.45    3.33
   0 -12 -37    4.45    3.33
   0  12 -37    7.35    3.51
   0  12 -38    4.39    3.33
   0 -12 -38   15.32    4.07
   0 -12 -38    6.30    3.04
   0 -12 -39    6.65    3.74
   0  12 -39    6.06    3.79
   0 -12 -39    8.34    3.75
   0 -12 -40   12.88    4.02
   0 -12 -42    4.59    3.90
   0  13   0   14.66    2.06
   0 -13   0   16.92    1.90
   0 -13   1  368.94    6.27
   0  13   1  363.83    6.26
   0  13  -1  371.28    6.35
   0 -13  -1  367.04    6.13
   0  13  -2   24.36    1.91
   0  13   2   23.09    1.83
   0 -13  -2   21.45    1.68
   0 -13   2   24.21    1.90
   0  13   3  141.20    3.97
   0  13  -3  141.14    4.02
   0 -13   3  140.05    4.00
   0 -13   4   29.03    2.24
   0  13  -4   26.00    2.01
   0  13   4   24.21    1.92
   0 -13  -4   25.79    1.94
   0  13   5  844.46    9.62
   0 -13   5  833.33    9.88
   0  13  -5  834.89    9.89
   0 -13  -5  865.62    9.48
   0 -13   6   10.75    1.73
   0  13  -6   12.14    1.78
   0  13   6   15.28    1.74
   0 -13  -6   13.89    1.65
   0  13   7   19.49    1.83
   0 -13   7   17.53    1.81
   0 -13  -7   19.79    1.80
   0  13  -7   19.99    1.93
   0 -13  -8  470.73    7.33
   0 -13   8  438.99    7.79
   0  13   8  480.35    7.64
   0  13  -8  450.13    7.77
   0  13  -9    8.41    1.65
   0 -13  -9    9.33    1.63
   0  13   9    8.54    1.61
   0 -13   9   10.20    1.80
   0  13  10  239.84    5.68
   0  13 -10  225.45    5.80
   0 -13  10  227.40    5.91
   0 -13 -10  240.07    5.50
   0  13 -11  188.83    5.46
   0 -13  11  188.73    5.62
   0  13  11  176.98    5.04
   0 -13 -11  181.20    4.93
   0 -13  12  445.23    8.62
   0  13 -12  441.75    8.40
   0  13  12  433.99    7.86
   0 -13 -12  443.17    7.81
   0 -13 -13  173.03    5.05
   0  13 -13  172.44    5.42
   0 -13  13  179.23    5.68
   0  13 -14   13.03    1.97
   0 -13 -14   14.25    1.90
   0 -13  14   10.02    1.96
   0 -13 -15   99.85    4.10
   0  13 -15  101.54    4.51
   0 -13  15  106.46    4.73
   0 -13  16  115.99    4.93
   0  13 -16  113.20    4.83
   0 -13 -16  121.23    4.61
   0 -13  17   32.53    2.96
   0 -13 -17   33.56    2.72
   0  13 -17   26.02    2.68
   0 -13  18  115.32    5.20
   0 -13 -18  117.24    4.76
   0  13 -18  124.15    5.24
   0 -13 -19   26.44    2.67
   0 -13  19   24.74    2.91
   0  13 -19   22.91    2.66
   0  13 -20  171.43    6.33
   0 -13 -20  175.75    5.98
   0 -13  20  173.62    6.62
   0  13 -21  270.99    8.00
   0 -13  21  281.79    8.48
   0 -13 -21  277.10    7.59
   0 -13  22  118.34    5.76
   0  13 -22  120.43    5.65
   0 -13 -22  121.55    5.31
   0  13 -23   91.99    5.29
   0 -13 -23   96.55    5.06
   0 -13  23   94.55    5.54
   0 -13  24   77.23    5.12
   0  13 -24   76.69    4.98
   0  13 -25    3.63    2.28
   0 -13  25    6.76    2.56
   0 -13 -25    5.45    2.29
   0 -13 -26   23.81    3.12
   0  13 -26   20.30    3.25
   0 -13  26   15.37    3.22
   0 -13  27   28.63    3.91
   0 -13 -27   41.21    3.97
   0  13 -27   36.51    3.81
   0 -13 -28    4.83    2.58
   0 -13  28    8.32    3.23
   0  13 -28    4.38    2.52
   0 -13  29    2.09    2.67
   0 -13 -29    5.77    2.63
   0  13 -29    5.15    2.53
   0 -13  30    3.67    2.93
   0 -13 -30    2.48    2.45
   0  13 -30    5.21    2.67
   0 -13  31   -2.63    2.94
   0 -13 -31    0.05    2.47
   0 -13 -31    1.37    2.47
   0  13 -31    0.82    2.66
   0 -13 -32   49.46    4.69
   0  13 -32   51.95    5.05
   0 -13  32   43.14    4.92
   0 -13 -32   42.88    4.40
   0  13 -33    8.65    3.10
   0 -13 -33    8.45    3.24
   0 -13 -33    3.65    2.73
   0  13 -34   23.85    4.14
   0 -13 -34   24.13    4.04
   0 -13 -34   16.62    3.44
   0 -13 -35    0.95    2.92
   0 -13 -35    6.85    3.30
   0  13 -35    4.18    3.06
   0 -13 -36   12.33    3.59
   0  13 -36    6.38    3.32
   0 -13 -36   18.51    3.98
   0  13 -37    9.67    3.74
   0 -13 -37    4.10    3.22
   0 -13 -37    2.58    3.37
   0 -13 -38    5.20    3.36
   0 -13 -38    8.31    3.46
   0  13 -38    3.48    3.66
   0  13 -39   16.75    4.44
   0 -13 -39   20.02    4.22
   0 -13 -40    1.56    3.42
   0 -13 -41    3.96    3.77
   0 -13 -43   15.23    4.77
   0 -14   0  138.65    4.09
   0  14   0  121.02    3.87
   0 -14  -1   67.43    2.98
   0  14   1   72.88    3.22
   0  14  -1   75.49    3.22
   0  14  -2   46.77    3.16
   0 -14  -2   47.33    2.84
   0  14   2   41.89    3.13
   0 -14   3 2166.79   15.93
   0 -14  -3 2156.70   15.12
   0  14  -3 2139.59   15.90
   0  14   3 2108.61   15.59
   0  14  -4  707.96    9.27
   0  14   4  705.48    9.13
   0 -14  -4  718.97    8.93
   0 -14   4  708.65    9.32
   0  14  -5   83.76    3.45
   0 -14  -5   89.04    3.30
   0  14   5   88.10    3.40
   0 -14   5   85.46    3.50
   0 -14   6   71.09    3.25
   0  14  -6   70.05    3.24
   0  14   6   71.16    3.09
   0 -14  -6   73.56    3.03
   0 -14  -7   31.18    2.29
   0  14  -7   27.13    2.47
   0  14   7   29.99    2.48
   0 -14   7   29.18    2.44
   0  14  -8  335.41    6.90
   0 -14   8  336.69    7.01
   0 -14  -8  340.22    6.44
   0  14   8  318.28    6.43
   0  14  -9  205.86    5.58
   0  14   9  208.58    5.38
   0 -14  -9  216.95    5.25
   0 -14   9  205.18    5.63
   0 -14 -10   10.11    1.65
   0  14 -10   10.57    1.86
   0  14  10   11.44    1.79
   0 -14  10   10.50    1.99
   0 -14  11   22.06    2.35
   0 -14 -11   24.53    2.17
   0  14 -11   24.94    2.37
   0  14  11   25.60    2.22
   0  14  12 1243.49   13.39
   0 -14  12 1257.22   14.62
   0  14 -12 1274.69   14.40
   0 -14 -12 1278.79   13.31
   0 -14  13  133.80    5.20
   0 -14 -13  127.37    4.49
   0  14 -13  135.94    5.05
   0  14 -14   34.52    2.89
   0 -14  14   42.67    3.28
   0 -14 -14   36.28    2.74
   0 -14  15   32.75    3.02
   0  14 -15   37.40    3.00
   0 -14 -16  117.58    4.54
   0 -14  16  111.97    4.98
   0  14 -16  109.49    4.84
   0  14 -17  201.52    6.61
   0 -14 -17  215.53    6.24
   0 -14  17  192.62    6.58
   0 -14 -18  144.88    5.27
   0 -14  18  138.37    5.69
   0  14 -18  140.18    5.62
   0 -14  19  160.02    6.28
   0 -14 -19  153.02    5.56
   0  14 -19  165.37    6.16
   0 -14  20   44.82    3.74
   0  14 -20   44.96    3.59
   0 -14 -20   43.25    3.33
   0 -14 -21   39.69    3.22
   0  14 -21   42.28    3.56
   0 -14  21   47.32    3.92
   0 -14  22  113.69    5.81
   0  14 -22  115.76    5.63
   0 -14 -22  103.14    4.95
   0 -14  23   35.47    3.73
   0 -14 -23   42.87    3.67
   0  14 -23   37.89    3.57
   0 -14  24   11.57    2.92
   0  14 -24   11.29    2.74
   0 -14  25   16.39    2.96
   0  14 -25   17.73    3.06
   0 -14 -25   14.74    2.92
   0 -14  26   56.73    4.76
   0  14 -26   58.44    4.54
   0  14 -27    9.74    2.83
   0 -14  27   13.33    3.25
   0 -14 -27   15.78    3.09
   0 -14 -28   12.08    2.79
   0  14 -28    9.56    2.80
   0 -14  28    6.88    2.85
   0  14 -29   22.09    3.78
   0 -14  29   21.60    3.75
   0 -14 -29   15.99    3.10
   0 -14 -30   37.85    4.06
   0  14 -30   34.55    4.12
   0 -14  30   38.06    4.50
   0  14 -31    7.74    2.88
   0 -14  31    6.32    3.32
   0 -14 -31    6.40    2.88
   0  14 -32    5.95    3.18
   0 -14  32    2.86    3.08
   0 -14 -32    5.74    2.96
   0 -14 -32    7.48    2.95
   0 -14 -33   -1.15    2.90
   0 -14  33    3.92    3.45
   0 -14 -33   -0.42    2.78
   0  14 -33   -0.11    2.75
   0 -14 -34   26.64    4.21
   0 -14 -34   31.53    4.32
   0  14 -34   27.58    4.31
   0 -14 -35    3.86    3.04
   0  14 -35   -0.57    2.99
   0 -14 -35    5.36    3.14
   0  14 -36    7.27    3.58
   0 -14 -36    8.43    3.42
   0 -14 -36   11.80    3.55
   0 -14 -37    5.35    3.59
   0  14 -37    7.60    3.58
   0 -14 -37    3.74    3.08
   0 -14 -38   23.71    4.33
   0  14 -38   26.89    4.62
   0 -14 -38   22.56    4.37
   0 -14 -39    7.58    3.62
   0 -14 -40    1.16    3.46
   0 -14 -41   -1.59    3.53
   0 -14 -42   14.99    4.52
   0 -14 -43   -1.32    4.00
   0 -15   0   -0.07    1.09
   0  15   0    1.36    1.18
   0  15   1   22.70    2.07
   0  15  -1   22.50    1.91
   0 -15  -1   19.99    1.84
   0 -15  -2    3.27    1.21
   0 -15   2    3.97    1.39
   0  15   2    2.39    1.19
   0  15  -2    1.03    1.13
   0 -15  -3  947.45   10.37
   0  15   3  989.18   11.04
   0  15  -3  958.56   11.08
   0 -15   3  976.23   11.12
   0  15   4   11.76    1.76
   0  15  -4   12.54    1.70
   0 -15  -4    9.51    1.53
   0 -15   4   12.40    1.78
   0  15  -5  540.48    8.50
   0  15   5  556.35    8.45
   0 -15   5  565.68    8.71
   0 -15  -5  583.50    8.37
   0 -15  -6   48.03    2.64
   0  15   6   41.77    2.55
   0  15  -6   45.72    2.83
   0 -15   6   50.83    2.95
   0 -15  -7  322.11    6.41
   0  15   7  301.71    6.47
   0  15  -7  303.94    6.70
   0 -15   7  310.81    6.80
   0  15  -8  179.31    5.40
   0  15   8  188.95    5.24
   0 -15  -8  187.35    5.09
   0 -15   8  174.69    5.35
   0 -15   9  403.53    8.09
   0  15   9  382.93    7.51
   0  15  -9  391.16    7.89
   0 -15  -9  383.87    7.31
   0 -15 -10  795.96   10.42
   0  15  10  801.49   10.92
   0  15 -10  776.06   11.22
   0 -15  10  773.00   11.23
   0 -15  11    5.50    1.86
   0  15  11    4.68    1.79
   0  15 -11    6.12    1.83
   0 -15 -11    3.40    1.52
   0 -15 -12   72.06    3.48
   0  15 -12   62.98    3.48
   0 -15  12   64.89    3.70
   0  15  12   73.11    3.61
   0  15 -13  218.72    6.37
   0 -15 -13  226.76    5.96
   0 -15  13  218.62    6.63
   0  15  13  216.55    5.96
   0  15 -14    2.67    1.53
   0 -15  14    7.78    2.09
   0 -15 -14    5.34    1.66
   0 -15  15    1.97    1.82
   0  15 -15    0.43    1.64
   0 -15 -15    2.14    1.62
   0 -15 -16   58.10    3.46
   0 -15  16   69.56    4.27
   0  15 -16   62.24    3.90
   0 -15 -17   19.48    2.46
   0  15 -17   19.88    2.55
   0 -15  17   15.30    2.45
   0 -15 -18   24.58    2.60
   0 -15  18   22.75    2.88
   0  15 -18   21.55    2.66
   0 -15 -19   93.94    4.45
   0  15 -19   88.44    4.79
   0 -15  19   90.88    5.00
   0 -15  20   48.68    4.05
   0  15 -20   51.12    3.97
   0 -15 -20   51.79    3.59
   0  15 -21  302.19    8.76
   0 -15  21  323.91    9.35
   0 -15 -21  306.50    8.09
   0  15 -22   88.12    5.24
   0 -15  22   84.68    5.38
   0 -15 -22   77.99    4.55
   0 -15 -23   33.77    3.49
   0 -15  23   38.84    4.03
   0  15 -23   37.83    3.82
   0 -15  24    4.72    2.79
   0  15 -24    1.58    2.33
   0 -15 -24    2.21    2.03
   0 -15 -25  138.41    6.11
   0 -15  25  128.85    6.65
   0  15 -25  131.61    6.36
   0 -15 -26   69.38    4.72
   0 -15  26   65.64    5.26
   0  15 -26   65.18    4.72
   0 -15  27   36.15    4.25
   0 -15 -27   34.14    3.77
   0  15 -27   28.34    3.68
   0  15 -28   15.51    3.04
   0 -15 -28   13.17    2.93
   0  15 -29   25.22    3.83
   0 -15 -29   22.73    3.48
   0 -15  29   25.46    4.26
   0  15 -30    1.44    2.83
   0 -15 -30    3.87    2.59
   0 -15  30    3.28    3.15
   0 -15  31    7.76    3.34
   0 -15 -31   12.25    3.21
   0  15 -31   10.11    3.36
   0 -15  32   -4.91    3.50
   0 -15 -32    1.08    2.68
   0  15 -32   -0.86    2.80
   0 -15 -32    0.11    2.56
   0 -15 -33   25.91    3.87
   0 -15 -33   34.12    4.28
   0 -15  33   22.84    4.40
   0  15 -33   20.91    3.73
   0 -15 -34    4.52    2.89
   0 -15 -34    2.32    3.13
   0  15 -34    2.02    3.05
   0 -15 -35   29.19    4.33
   0  15 -35   26.95    4.42
   0 -15 -35   24.99    4.23
   0 -15 -36   -3.65    3.22
   0 -15 -36   -2.19    3.36
   0  15 -36   -2.47    3.38
   0  15 -37    4.37    3.62
   0 -15 -37   -2.94    3.10
   0 -15 -37   -1.63    3.44
   0 -15 -38    1.35    3.39
   0 -15 -38    7.43    3.57
   0  15 -38    2.31    3.46
   0 -15 -39    3.81    3.60
   0 -15 -40    1.61    3.51
   0 -15 -41    7.37    3.87
   0 -15 -42    4.12    4.04
   0 -16   0   44.55    2.60
   0  16   0   48.11    2.74
   0  16   1   48.44    2.74
   0 -16   1   54.36    2.83
   0  16  -1   48.75    2.78
   0 -16  -1   50.43    2.79
   0  16   2   45.73    2.70
   0 -16   2   47.44    2.73
   0  16  -2   45.65    2.76
   0 -16  -2   46.89    2.64
   0 -16  -3  193.98    5.05
   0  16   3  194.06    5.21
   0  16  -3  187.15    5.25
   0 -16   3  185.50    5.13
   0 -16   4 1008.01   11.82
   0  16  -4 1034.13   12.07
   0  16   4 1027.35   11.78
   0  16   5    2.60    1.26
   0  16  -5    2.88    1.52
   0 -16  -5    1.62    1.29
   0 -16   5    4.09    1.58
   0 -16  -6  249.15    5.73
   0 -16   6  242.63    6.12
   0  16  -6  236.99    5.93
   0  16   6  248.69    5.87
   0 -16  -7    2.56    1.31
   0 -16   7    0.62    1.43
   0  16   7    1.00    1.28
   0  16  -7    0.66    1.34
   0 -16  -8  114.54    4.09
   0  16   8  121.71    4.38
   0  16  -8  111.40    4.44
   0 -16   8  120.03    4.56
   0  16  -9    5.06    1.68
   0 -16   9    4.39    1.69
   0  16   9    6.89    1.52
   0 -16  -9    4.75    1.43
   0  16 -10   25.37    2.47
   0 -16  10   26.87    2.53
   0  16  10   17.86    2.01
   0 -16 -10   20.82    2.12
   0 -16  11  111.73    4.64
   0  16 -11  105.09    4.47
   0  16  11  100.97    4.16
   0 -16 -11  109.66    4.16
   0  16 -12  292.83    7.36
   0 -16 -12  307.26    6.85
   0  16  12  296.11    6.98
   0 -16  12  298.77    7.55
   0  16  13    5.17    1.84
   0  16 -13    2.75    1.70
   0 -16  13    8.54    2.18
   0 -16 -13    2.92    1.69
   0  16 -14  128.89    5.18
   0 -16 -14  117.32    4.59
   0 -16  14  132.70    5.38
   0  16 -15    1.25    1.56
   0 -16  15    3.57    1.72
   0 -16 -15   -0.93    1.55
   0 -16 -16   48.66    3.25
   0  16 -16   55.79    3.78
   0 -16  16   60.30    4.04
   0 -16 -17   29.51    2.74
   0  16 -17   29.56    3.04
   0 -16  17   29.01    3.14
   0 -16 -18   47.04    3.39
   0  16 -18   43.98    3.61
   0 -16  18   45.00    3.83
   0 -16  19    4.01    2.00
   0 -16 -19   -0.25    2.01
   0  16 -19    2.03    1.79
   0  16 -20    3.27    2.17
   0 -16 -20    6.08    2.28
   0 -16  20    4.56    2.39
   0  16 -21   44.64    3.91
   0 -16  21   41.77    3.88
   0 -16 -21   45.21    3.57
   0 -16  22   26.47    3.65
   0 -16 -22   27.99    3.07
   0  16 -22   29.44    3.51
   0 -16  23   56.43    4.67
   0  16 -23   58.34    4.53
   0 -16 -23   55.89    4.01
   0 -16  24    9.91    2.80
   0 -16 -24   10.62    2.43
   0  16 -24   11.38    2.79
   0  16 -25    0.02    2.46
   0 -16 -25   -0.08    2.13
   0 -16  25   -1.64    2.51
   0 -16 -26   31.15    3.54
   0  16 -26   25.81    3.67
   0 -16  27   -0.66    2.77
   0 -16 -27    3.82    2.42
   0  16 -27    7.30    2.91
   0  16 -28    7.36    2.95
   0 -16  28    8.53    3.13
   0 -16 -28    7.11    2.62
   0 -16  29    4.98    3.10
   0 -16 -29    5.22    2.70
   0  16 -29    2.49    2.67
   0 -16 -30   16.20    3.22
   0  16 -30   20.79    3.50
   0 -16  30   24.33    4.11
   0 -16 -31   12.26    3.25
   0  16 -31   13.15    3.43
   0 -16  31   12.93    3.95
   0 -16 -32   33.94    4.26
   0 -16  32   27.91    4.61
   0  16 -32   31.13    4.36
   0 -16 -33   32.83    4.27
   0 -16 -33   27.59    4.09
   0  16 -33   37.56    4.94
   0  16 -34   90.51    6.62
   0 -16 -34  104.21    6.65
   0 -16 -34   90.31    6.35
   0  16 -35    3.92    3.29
   0 -16 -35   10.45    3.83
   0 -16 -35    5.71    3.28
   0 -16 -36    6.40    3.47
   0 -16 -36    3.83    3.17
   0  16 -36    8.91    3.92
   0  16 -37   -0.36    3.29
   0 -16 -37    4.65    3.49
   0 -16 -37   -0.66    3.19
   0 -16 -38    4.04    3.65
   0 -16 -38   -4.39    3.71
   0 -16 -39   -2.13    3.47
   0 -16 -40    4.25    3.78
   0 -16 -41   -4.50    4.06
   0 -16 -42   20.11    4.97
   0  17   0    1.23    1.45
   0 -17   0    1.64    1.32
   0 -17   1   10.46    1.89
   0 -17  -1    5.44    1.54
   0  17   1    5.75    1.61
   0  17  -1    8.94    1.63
   0 -17   2    7.20    1.65
   0  17  -2    9.67    1.68
   0 -17  -2    6.78    1.64
   0  17   2   10.19    1.71
   0 -17  -3  113.06    4.04
   0  17   3  117.08    4.28
   0  17  -3  109.54    4.24
   0 -17   3  111.68    4.19
   0 -17  -4    3.40    1.25
   0 -17   4    3.00    1.53
   0  17   4    3.12    1.42
   0  17  -4    4.67    1.52
   0  17  -5  180.05    5.38
   0 -17  -5  189.44    5.12
   0  17   5  189.92    5.39
   0 -17   5  175.47    5.28
   0 -17   6   56.75    3.26
   0  17   6   52.32    2.95
   0  17  -6   52.88    3.14
   0 -17  -6   51.69    2.88
   0 -17   7   11.68    1.96
   0 -17  -7   11.49    1.87
   0  17   7   12.78    1.99
   0  17  -7   12.23    1.93
   0 -17   8   88.92    4.11
   0  17   8   88.51    3.77
   0  17  -8   89.70    4.04
   0 -17  -8   91.75    3.81
   0 -17   9    4.59    1.67
   0 -17  -9    6.94    1.72
   0  17  -9    6.58    1.81
   0  17   9    2.86    1.49
   0  17  10    3.50    1.55
   0 -17  10   -1.15    1.63
   0 -17 -10    0.57    1.30
   0  17 -10    2.08    1.64
   0  17  11   16.95    2.12
   0 -17 -11   16.43    2.04
   0 -17  11   15.21    2.28
   0  17 -11   14.27    2.12
   0 -17  12   83.67    4.33
   0  17 -12   79.65    4.06
   0 -17 -12   75.00    3.73
   0  17  12   76.57    3.78
   0  17  13  178.59    5.69
   0 -17  13  170.05    6.06
   0 -17 -13  173.78    5.43
   0  17 -13  171.94    5.94
   0  17  14   24.46    2.56
   0 -17 -14   26.26    2.53
   0 -17  14   21.03    2.67
   0  17 -14   20.38    2.46
   0  17 -15    1.06    1.61
   0 -17  15   -0.87    1.78
   0 -17 -15   -0.36    1.47
   0 -17  16   99.26    5.06
   0  17 -16   98.59    4.95
   0 -17 -16   95.51    4.50
   0 -17 -17   85.81    4.24
   0 -17  17   89.77    4.95
   0  17 -17   83.10    4.61
   0 -17 -18   -1.90    1.82
   0 -17  18   -3.03    2.30
   0  17 -18    1.31    1.91
   0  17 -19   -0.39    1.99
   0 -17  19    1.15    2.10
   0 -17  20   10.06    2.78
   0 -17 -20   10.26    2.33
   0  17 -20    5.18    2.37
   0 -17  21  231.81    8.28
   0 -17 -21  217.13    7.09
   0  17 -21  232.75    8.00
   0  17 -22   84.16    5.16
   0 -17 -22   94.35    4.96
   0 -17  22   89.39    5.52
   0 -17 -23    0.24    2.00
   0 -17  23   -1.06    2.51
   0  17 -23    4.44    2.59
   0  17 -24  114.46    6.18
   0 -17  24  117.96    6.43
   0 -17 -24  113.57    5.53
   0 -17 -25  146.98    6.33
   0 -17  25  143.60    7.17
   0  17 -25  139.71    6.78
   0 -17  26   14.58    3.41
   0 -17 -26   17.74    3.00
   0  17 -26   15.98    3.28
   0 -17 -27   86.29    5.46
   0  17 -27   94.04    6.12
   0 -17  27   89.80    6.14
   0 -17  28   99.52    6.66
   0 -17 -28  101.72    5.83
   0  17 -28   97.40    6.29
   0 -17 -29    2.35    2.54
   0  17 -29    3.23    2.90
   0 -17  29   -0.22    3.04
   0 -17 -30   35.01    4.08
   0 -17  30   33.31    4.64
   0  17 -30   24.53    3.85
   0  17 -31    1.22    2.72
   0 -17  31    1.85    3.05
   0 -17 -31    4.58    3.00
   0  17 -32   16.46    3.78
   0 -17 -32   21.91    3.96
   0 -17 -33   17.05    3.62
   0  17 -33   14.64    3.66
   0 -17 -34    2.19    3.15
   0  17 -34    2.22    3.15
   0 -17 -34    4.09    3.38
   0  17 -35   29.59    4.63
   0 -17 -35   31.05    4.54
   0 -17 -35   29.03    4.41
   0 -17 -36    3.10    3.05
   0 -17 -36    1.19    3.40
   0  17 -36   -1.26    3.42
   0 -17 -37   -2.76    3.53
   0 -17 -37   -1.35    3.30
   0 -17 -38   11.46    3.96
   0 -17 -39    2.42    3.69
   0 -17 -40    3.05    3.63
   0 -17 -41   12.39    4.45
   0 -17 -42    0.63    4.06
   0  18   0   33.33    2.59
   0 -18   0   29.40    2.40
   0 -18   1   51.41    3.04
   0 -18  -1   47.03    2.82
   0  18   1   54.47    3.12
   0  18  -1   50.30    2.99
   0  18  -2   18.14    2.18
   0 -18   2   14.17    2.09
   0  18   2   18.84    2.22
   0 -18  -2   17.19    2.14
   0  18   3   16.76    2.04
   0  18  -3   14.83    1.97
   0 -18  -3   15.81    1.99
   0 -18   3   14.67    2.05
   0  18   4   68.65    3.37
   0  18  -4   64.42    3.41
   0 -18  -4   62.49    3.23
   0 -18   4   58.77    3.25
   0  18   5   21.40    2.28
   0  18  -5   19.52    2.29
   0 -18  -5   21.07    2.16
   0 -18   5   19.62    2.35
   0 -18  -6    4.74    1.62
   0  18   6    6.17    1.92
   0 -18   6   10.41    2.08
   0  18  -6    6.49    1.82
   0  18   7   53.22    3.18
   0  18  -7   53.61    3.24
   0 -18  -7   51.02    3.01
   0 -18   7   59.25    3.50
   0  18   8   94.82    4.06
   0  18  -8  101.52    4.40
   0 -18  -8  102.93    4.11
   0 -18   8  111.14    4.69
   0  18  -9   20.39    2.38
   0  18   9   19.75    2.30
   0 -18   9   19.58    2.37
   0 -18  -9   18.77    2.11
   0  18 -10    4.25    1.71
   0 -18  10    3.69    1.76
   0  18  10    4.78    1.66
   0 -18 -10    6.36    1.79
   0  18  11   67.72    3.71
   0 -18 -11   62.51    3.42
   0  18 -11   57.15    3.60
   0 -18  11   60.23    3.78
   0  18  12   51.41    3.41
   0 -18 -12   43.26    3.02
   0  18 -12   49.15    3.51
   0 -18  12   46.58    3.50
   0 -18 -13    8.66    2.03
   0  18 -13    9.77    2.26
   0 -18  13   12.51    2.56
   0  18  13    6.87    2.01
   0 -18 -14   76.37    3.93
   0  18  14   68.15    3.86
   0  18 -14   76.05    4.28
   0  18 -15   74.68    4.38
   0 -18 -15   72.60    3.90
   0 -18  15   67.77    4.36
   0 -18 -16  116.20    4.87
   0  18 -16  112.45    5.33
   0 -18  16  107.65    5.40
   0  18 -17   76.98    4.62
   0 -18  17   72.52    4.70
   0 -18 -17   73.57    4.16
   0 -18 -18   98.77    4.78
   0  18 -18   91.29    5.10
   0 -18  18   96.22    5.36
   0 -18 -19  243.18    7.27
   0  18 -19  245.73    8.09
   0 -18  19  246.73    8.24
   0 -18  20    3.71    2.71
   0 -18 -20    0.91    2.12
   0  18 -20    2.94    2.46
   0 -18  21  159.30    7.09
   0  18 -21  165.12    6.88
   0 -18 -21  166.32    6.32
   0 -18 -22    7.04    2.38
   0 -18  22   13.13    3.08
   0  18 -22   13.26    2.80
   0 -18 -23   20.35    3.05
   0  18 -23   23.68    3.43
   0 -18  23   20.39    3.53
   0  18 -24   51.89    4.48
   0 -18  24   45.52    4.44
   0 -18 -24   52.90    4.21
   0 -18 -25   29.61    3.53
   0  18 -25   31.32    3.95
   0 -18  25   29.23    3.84
   0 -18  26   39.08    4.48
   0  18 -26   43.89    4.48
   0 -18 -26   42.31    4.11
   0 -18 -27    1.08    2.27
   0  18 -27   -3.69    2.88
   0 -18  27    1.82    2.77
   0 -18 -28    2.13    2.47
   0  18 -28    0.80    2.62
   0 -18 -29   12.16    3.08
   0  18 -29    6.83    3.07
   0 -18  29    8.79    3.49
   0 -18 -30    1.50    2.67
   0  18 -30   -1.33    2.79
   0  18 -31   37.49    4.73
   0 -18 -31   35.73    4.27
   0 -18 -32   10.13    3.12
   0  18 -32   10.69    3.38
   0 -18 -33   28.51    4.18
   0  18 -33   31.11    4.76
   0 -18 -34   30.47    4.38
   0 -18 -34   31.90    4.39
   0  18 -34   36.95    4.93
   0  18 -35    2.19    3.34
   0 -18 -35   -1.96    3.22
   0 -18 -35    3.58    3.11
   0  18 -36   13.51    4.18
   0 -18 -36   14.95    4.21
   0 -18 -36    5.79    3.46
   0 -18 -37    1.57    3.42
   0 -18 -37    9.04    3.89
   0 -18 -38    8.85    3.94
   0 -18 -39    9.67    4.27
   0 -18 -40    2.52    3.82
   0 -18 -41    3.79    4.23
   0 -19   0    1.58    1.47
   0  19   0    2.73    1.62
   0 -19   1  400.14    8.03
   0 -19  -1  405.17    7.97
   0  19  -1  380.70    7.98
   0  19   1  389.34    7.99
   0  19   2    5.37    1.69
   0 -19   2    3.82    1.54
   0  19  -2    9.00    2.10
   0 -19  -2    4.43    1.68
   0 -19   3   21.30    2.34
   0  19  -3   25.22    2.60
   0 -19  -3   23.36    2.29
   0  19   3   22.89    2.47
   0 -19   4    0.25    1.55
   0 -19  -4    0.27    1.35
   0  19  -4    0.50    1.37
   0  19   4    0.68    1.40
   0  19  -5   44.83    3.09
   0 -19   5   43.23    3.01
   0 -19  -5   40.11    2.76
   0  19   5   39.46    2.82
   0 -19  -6   32.03    2.55
   0  19  -6   34.04    2.81
   0  19   6   37.60    2.73
   0 -19   6   35.28    2.86
   0  19   7   20.92    2.31
   0  19  -7   16.36    2.17
   0 -19  -7   20.21    2.20
   0 -19   7   15.04    2.14
   0  19   8   46.24    3.09
   0 -19   8   42.30    3.20
   0 -19  -8   42.09    2.93
   0  19  -8   44.42    3.20
   0 -19  -9  336.16    7.45
   0  19   9  331.16    7.65
   0 -19   9  326.01    8.05
   0  19  -9  335.06    8.03
   0 -19  10   23.64    2.66
   0 -19 -10   23.77    2.48
   0  19 -10   20.45    2.51
   0  19  10   19.50    2.37
   0  19 -11   45.04    3.49
   0 -19 -11   43.31    3.21
   0  19  11   45.17    3.26
   0 -19  11   50.13    3.77
   0  19 -12  155.39    5.97
   0 -19  12  154.03    6.05
   0 -19 -12  149.59    5.32
   0  19  12  145.32    5.46
   0  19  13   43.11    3.47
   0 -19  13   53.55    4.04
   0  19 -13   48.77    3.76
   0 -19 -13   42.83    3.25
   0 -19 -14  254.53    6.95
   0  19  14  244.01    7.06
   0  19 -14  252.37    7.52
   0 -19  14  238.67    7.68
   0  19 -15    8.49    2.43
   0 -19  15    6.62    2.44
   0 -19 -15    8.45    2.04
   0 -19 -16   69.92    3.99
   0  19 -16   69.26    4.28
   0 -19  16   69.08    4.55
   0  19 -17   57.17    4.07
   0 -19  17   55.90    4.25
   0 -19 -17   67.52    3.97
   0 -19  18   21.25    3.29
   0  19 -18   16.44    2.71
   0 -19 -18   22.29    2.74
   0 -19 -19   40.66    3.58
   0 -19  19   43.07    4.15
   0  19 -19   37.35    3.67
   0 -19  20    1.86    2.32
   0  19 -20    2.42    2.29
   0 -19 -20    0.85    1.92
   0  19 -21   -4.66    2.46
   0 -19 -21   -0.44    1.98
   0 -19  21    1.03    2.35
   0  19 -22   49.82    4.43
   0 -19 -22   48.83    4.04
   0 -19  22   42.52    4.39
   0 -19 -23   95.15    5.16
   0  19 -23   91.34    5.63
   0 -19  23   97.15    6.16
   0 -19  24   42.63    4.66
   0 -19 -24   34.56    3.64
   0  19 -24   39.77    4.35
   0 -19 -25   72.89    4.83
   0  19 -25   83.57    5.67
   0 -19  25   78.09    5.80
   0 -19 -26   64.16    4.81
   0  19 -26   60.01    5.04
   0 -19  26   65.54    5.54
   0 -19  27    7.07    3.21
   0  19 -27    8.27    3.01
   0 -19 -27    0.10    2.45
   0 -19  28   26.75    4.19
   0 -19 -28   34.48    3.93
   0  19 -28   27.09    4.06
   0 -19 -29    1.23    2.60
   0  19 -29    0.31    2.68
   0 -19  29   -2.45    3.11
   0 -19 -30   11.23    3.11
   0  19 -30   15.09    3.47
   0 -19  30    7.44    3.44
   0  19 -31   10.38    3.57
   0 -19 -31   11.44    3.40
   0  19 -32    0.33    3.00
   0 -19 -32    4.06    2.93
   0  19 -33    2.66    3.18
   0 -19 -33    4.38    3.16
   0 -19 -34   -1.57    3.06
   0  19 -34    2.28    3.54
   0  19 -35   12.30    3.90
   0 -19 -35   14.90    4.11
   0 -19 -35    6.54    3.39
   0 -19 -36    0.25    3.39
   0 -19 -36    2.39    3.60
   0 -19 -37    2.70    3.64
   0 -19 -38    3.21    3.71
   0 -19 -39    2.27    3.65
   0 -19 -40   -1.82    4.08
   0 -19 -41    4.63    3.98
   0 -20   0  469.22    8.84
   0  20   0  460.45    8.92
   0 -20  -1    8.87    1.83
   0  20  -1   11.63    2.08
   0  20   1   13.81    1.99
   0 -20   1   11.09    1.97
   0  20  -2   62.56    3.53
   0  20   2   68.73    3.63
   0 -20   2   65.31    3.57
   0 -20  -2   64.02    3.46
   0 -20  -3    4.83    1.62
   0  20   3    5.10    1.72
   0 -20   3    4.07    1.65
   0  20  -3    5.58    1.84
   0  20  -4    4.19    1.63
   0  20   4    6.46    1.70
   0 -20  -4    4.17    1.61
   0 -20   4    6.31    1.77
   0 -20  -5   59.78    3.40
   0  20  -5   58.99    3.53
   0 -20   5   62.24    3.76
   0  20   5   60.46    3.45
   0  20  -6  102.84    4.72
   0 -20   6  104.82    4.77
   0 -20  -6   99.92    4.34
   0  20   6   96.19    4.49
   0  20  -7   58.69    3.61
   0 -20   7   60.38    3.80
   0 -20  -7   54.92    3.32
   0  20   7   59.09    3.52
   0  20   8  226.07    6.55
   0 -20  -8  229.40    6.35
   0  20  -8  234.40    6.90
   0 -20   8  222.27    6.82
   0  20  -9  108.77    4.85
   0  20   9  113.14    4.80
   0 -20   9   99.15    4.78
   0 -20  -9  107.05    4.55
   0  20 -10   35.42    3.12
   0 -20  10   33.57    3.11
   0  20  10   38.20    3.06
   0 -20 -10   33.00    2.86
   0  20 -11    6.45    2.10
   0 -20 -11    5.26    1.78
   0  20  11    6.96    1.90
   0  20  12   10.58    2.08
   0 -20 -12   11.92    2.19
   0  20 -12    6.04    1.94
   0 -20  12    6.13    2.16
   0  20  13    8.29    2.16
   0 -20  13    4.76    2.33
   0  20 -13    6.67    2.24
   0 -20 -13    4.92    1.86
   0  20  14    7.57    1.94
   0 -20 -14   12.62    2.38
   0 -20  14   10.14    2.38
   0  20 -14   11.72    2.48
   0  20 -15    2.64    1.98
   0 -20  15    4.90    2.42
   0 -20 -15    5.30    2.01
   0  20  15    5.03    2.11
   0  20 -16  264.40    8.13
   0 -20 -16  252.27    7.24
   0 -20  16  247.96    8.20
   0 -20 -17   34.94    3.22
   0  20 -17   40.62    3.82
   0 -20  17   31.23    3.61
   0  20 -18  148.76    6.56
   0 -20  18  158.29    7.00
   0 -20 -18  149.24    5.94
   0  20 -19  112.17    5.95
   0 -20 -19  112.50    5.20
   0 -20  19  102.48    5.82
   0 -20  20    1.00    2.50
   0 -20 -20    4.62    2.17
   0  20 -20    3.21    2.48
   0 -20 -21    8.40    2.43
   0 -20  21    5.49    2.67
   0  20 -21    7.60    2.77
   0 -20  22   39.67    4.24
   0  20 -22   40.37    4.18
   0 -20 -22   40.84    3.76
   0 -20 -23   22.16    3.22
   0  20 -23   21.25    3.45
   0 -20  23   22.52    3.66
   0 -20 -24   -2.66    2.37
   0 -20  24   -2.58    3.07
   0  20 -24    1.25    2.41
   0 -20  25    3.14    3.17
   0 -20 -25   -1.77    2.43
   0  20 -25   -3.51    2.69
   0 -20 -26    6.61    2.65
   0  20 -26    8.11    2.87
   0 -20  26    3.31    2.80
   0 -20 -27    2.03    2.57
   0  20 -27   -2.83    2.83
   0 -20  27   -3.58    3.37
   0  20 -28    1.80    2.94
   0 -20 -28    0.79    2.49
   0 -20  28    2.68    3.10
   0  20 -29    5.30    3.13
   0 -20  29   -2.97    3.47
   0 -20 -29    1.22    2.60
   0  20 -30   17.88    3.73
   0 -20 -30   21.77    3.73
   0 -20 -31   37.62    4.46
   0  20 -31   34.97    4.89
   0  20 -32    2.37    3.17
   0 -20 -32    1.44    2.83
   0 -20 -33   14.16    3.56
   0  20 -33    8.46    3.70
   0 -20 -34    6.10    3.54
   0  20 -34    5.15    3.46
   0 -20 -35   -2.32    3.35
   0 -20 -35   -0.53    3.13
   0 -20 -36    4.59    3.79
   0 -20 -36    2.84    3.50
   0 -20 -37   -1.37    3.68
   0 -20 -38   19.27    4.55
   0 -20 -39    2.22    3.86
   0 -20 -40    5.17    4.13
   0  21   0    5.14    1.97
   0 -21   0    3.67    1.83
   0  21   1  383.69    8.35
   0  21  -1  378.94    8.46
   0 -21   1  371.57    8.18
   0 -21  -1  372.59    8.14
   0 -21  -2    9.34    2.13
   0  21  -2   13.13    2.13
   0 -21   2   10.72    2.10
   0  21   2    5.80    1.88
   0  21   3   41.74    3.16
   0  21  -3   40.54    3.28
   0 -21   3   40.48    3.09
   0 -21  -3   37.49    2.90
   0 -21  -4   19.54    2.40
   0 -21   4   21.16    2.53
   0  21  -4   19.75    2.48
   0  21   4   22.06    2.42
   0 -21   5   14.71    2.30
   0 -21  -5   17.51    2.33
   0  21   5   14.24    2.14
   0  21  -5   14.40    2.17
   0  21  -6  134.11    5.33
   0 -21  -6  131.95    4.93
   0  21   6  128.74    5.00
   0 -21   6  126.05    5.20
   0 -21   7  119.95    5.09
   0  21   7  119.23    4.87
   0  21  -7  116.40    5.05
   0 -21  -7  116.25    4.67
   0 -21   8    5.29    2.02
   0  21   8    2.91    1.69
   0  21  -8    4.77    1.87
   0 -21  -8    7.69    1.97
   0 -21  -9  183.01    5.82
   0  21   9  193.03    6.26
   0  21  -9  190.83    6.42
   0 -21   9  181.49    6.41
   0  21  10   32.14    3.01
   0 -21  10   31.36    3.20
   0  21 -10   33.81    3.13
   0 -21 -10   33.12    2.86
   0  21  11    4.19    1.81
   0  21 -11    5.46    1.99
   0 -21  11    5.50    2.14
   0 -21 -11    0.76    1.63
   0 -21 -12    2.01    1.76
   0  21  12    3.31    1.83
   0  21 -12    1.91    1.88
   0 -21  12    0.09    1.98
   0 -21 -13   -1.52    2.01
   0  21  13   -0.32    1.73
   0 -21  13    1.11    2.23
   0  21 -13    0.50    2.04
   0  21 -14   18.51    2.96
   0 -21 -14   17.88    2.62
   0  21  14   11.88    2.34
   0 -21  14   16.44    2.87
   0 -21  15   63.99    4.61
   0  21 -15   79.19    4.70
   0  21  15   68.32    4.30
   0 -21 -15   68.15    4.08
   0  21 -16   25.59    3.23
   0 -21 -16   31.75    3.18
   0 -21  16   32.20    3.54
   0 -21  17  124.50    6.23
   0  21 -17  129.76    6.10
   0 -21 -17  134.01    5.58
   0  21 -18   30.04    3.56
   0 -21 -18   28.53    3.16
   0 -21  18   30.09    3.77
   0 -21 -19    7.98    2.39
   0  21 -19   12.70    2.89
   0 -21  19    7.90    2.75
   0  21 -20   39.47    3.90
   0 -21 -20   35.30    3.38
   0 -21  20   37.77    4.25
   0 -21  21    5.15    2.87
   0 -21 -21    8.04    2.53
   0  21 -21    4.60    2.48
   0 -21  22    1.45    2.87
   0  21 -22    5.32    2.75
   0 -21 -22    6.24    2.56
   0 -21  23    6.93    3.17
   0 -21 -23    2.43    2.39
   0  21 -23    2.06    2.55
   0  21 -24    5.34    2.67
   0 -21 -24    5.30    2.47
   0 -21  24    8.09    2.89
   0 -21  25   27.16    4.27
   0  21 -25   26.37    3.82
   0 -21 -25   19.79    3.31
   0 -21  26   -0.99    2.92
   0 -21 -26    0.17    2.38
   0  21 -26    0.79    2.70
   0 -21  27   14.74    4.04
   0  21 -27    5.64    3.04
   0 -21 -27    6.91    2.82
   0  21 -28    6.71    3.11
   0 -21  28    2.44    3.17
   0 -21 -28    6.36    2.95
   0  21 -29   58.82    5.45
   0 -21 -29   61.14    5.02
   0  21 -30    8.43    3.50
   0 -21 -30   13.50    3.49
   0  21 -31   25.93    4.42
   0 -21 -31   23.76    4.02
   0  21 -32   -1.66    3.10
   0 -21 -32    0.64    3.08
   0 -21 -33    6.50    3.46
   0  21 -33    4.90    3.66
   0 -21 -34    6.77    3.43
   0 -21 -35    3.13    3.35
   0 -21 -36    3.26    3.56
   0 -21 -37    4.50    3.99
   0 -21 -38    2.71    3.91
   0 -21 -39    4.54    3.88
   0 -22   0  226.03    6.61
   0  22   0  243.25    7.01
   0  22   1    5.90    1.97
   0 -22  -1    1.41    1.69
   0 -22   1    5.09    1.98
   0  22  -1    7.72    2.03
   0 -22  -2   17.81    2.51
   0  22  -2   14.64    2.25
   0  22   2   15.43    2.40
   0 -22   2   11.34    2.17
   0  22  -3    5.95    1.95
   0 -22  -3    4.29    1.81
   0 -22   3    4.12    1.83
   0  22   3    3.86    1.81
   0  22   4    9.09    2.11
   0 -22  -4    9.47    2.05
   0  22  -4    8.33    2.09
   0 -22   4    8.32    2.10
   0  22   5   26.29    2.83
   0 -22  -5   25.75    2.62
   0 -22   5   24.15    2.77
   0  22  -5   25.21    2.84
   0  22  -6   60.09    4.01
   0 -22   6   54.39    3.82
   0 -22  -6   49.81    3.43
   0  22   6   55.00    3.79
   0 -22  -7  112.99    4.80
   0  22   7  121.85    5.15
   0 -22   7  114.66    5.20
   0  22  -7  129.31    5.51
   0 -22   8  193.37    6.71
   0 -22  -8  209.45    6.30
   0  22   8  201.33    6.60
   0  22  -8  207.08    6.88
   0 -22   9   49.39    3.82
   0 -22  -9   57.39    3.68
   0  22   9   43.67    3.55
   0  22  -9   51.87    3.75
   0 -22  10   17.99    2.80
   0 -22 -10   22.07    2.65
   0  22  10   26.83    3.02
   0  22 -10   17.14    2.74
   0 -22 -11   73.54    4.21
   0  22 -11   77.11    4.65
   0  22  11   69.36    4.33
   0 -22  11   75.59    4.72
   0 -22 -12   74.42    4.25
   0 -22  12   80.29    4.89
   0  22  12   78.58    4.58
   0  22 -12   86.03    5.01
   0  22  13   37.90    3.25
   0  22 -13   38.72    3.59
   0 -22 -13   32.53    3.08
   0 -22  13   33.61    3.60
   0  22  14   14.52    2.58
   0 -22  14   10.86    2.74
   0  22 -14   16.44    2.89
   0 -22 -14   11.37    2.37
   0  22  15   25.51    3.05
   0 -22 -15   26.93    2.98
   0 -22  15   28.21    3.55
   0  22 -15   24.55    3.32
   0  22 -16  115.34    5.80
   0 -22 -16  107.72    5.11
   0 -22  16   97.28    5.60
   0  22 -17   11.22    2.77
   0 -22 -17    2.89    2.04
   0 -22  17    8.63    3.03
   0 -22 -18    6.58    2.21
   0  22 -18   10.57    2.69
   0 -22  18    8.81    2.97
   0 -22 -19   34.76    3.45
   0 -22  19   28.83    3.72
   0  22 -19   30.49    3.61
   0 -22 -20   33.95    3.64
   0  22 -20   34.11    3.81
   0 -22  20   33.33    4.03
   0 -22 -21    2.49    2.22
   0 -22  21   -4.00    2.95
   0  22 -21   -0.35    2.40
   0  22 -22   72.09    5.28
   0 -22  22   65.48    5.19
   0 -22 -22   75.45    4.76
   0 -22 -23   11.03    2.76
   0 -22  23   13.53    3.42
   0  22 -23   13.80    3.39
   0 -22  24    1.60    2.87
   0 -22 -24    0.50    2.34
   0  22 -24   -4.15    2.86
   0 -22 -25   18.70    3.30
   0 -22  25   11.95    3.68
   0  22 -25   19.53    3.76
   0 -22 -26    8.24    2.86
   0  22 -26    5.74    2.95
   0 -22  26    3.98    3.26
   0 -22 -27   44.61    4.40
   0 -22  27   38.03    5.03
   0  22 -27   46.19    4.81
   0  22 -28    4.70    2.90
   0 -22 -28    0.15    2.59
   0 -22 -29    4.12    2.85
   0  22 -29   12.58    3.61
   0 -22 -30   18.12    3.74
   0  22 -30   25.18    4.37
   0  22 -31    2.23    3.47
   0 -22 -31    0.63    3.03
   0 -22 -32    6.36    3.32
   0  22 -32    2.47    3.31
   0 -22 -33    3.54    3.22
   0 -22 -34   -1.79    3.39
   0 -22 -35   -2.39    3.74
   0 -22 -36   13.62    4.26
   0 -22 -37   -0.30    3.72
   0 -22 -38   21.75    4.88
   0 -22 -39    2.78    4.20
   0  23   0    6.41    2.11
   0 -23   0    1.04    1.82
   0  23  -1  225.31    7.02
   0 -23   1  211.85    6.66
   0 -23  -1  226.43    6.81
   0  23   1  229.77    6.92
   0 -23  -2   19.22    2.55
   0  23  -2   18.44    2.68
   0  23   2   20.69    2.75
   0 -23   2   18.83    2.64
   0 -23   3    9.39    2.29
   0  23  -3   10.20    2.29
   0  23   3   12.46    2.30
   0 -23  -3   11.04    2.17
   0  23  -4    1.26    1.73
   0 -23   4    0.62    1.88
   0  23   4   -0.48    1.73
   0 -23  -4    3.88    1.92
   0 -23  -5   15.16    2.52
   0  23   5    7.79    2.00
   0 -23   5   13.58    2.50
   0  23  -5   10.11    2.48
   0  23  -6   -2.08    1.84
   0  23   6   -1.19    1.73
   0 -23   6   -1.35    2.00
   0 -23  -6   -1.25    1.79
   0  23   7    8.54    2.28
   0  23  -7    6.57    2.06
   0 -23   7    6.43    2.30
   0 -23  -7    7.16    2.14
   0 -23  -8   57.08    3.72
   0 -23   8   57.09    4.04
   0  23  -8   61.04    4.13
   0  23   8   64.66    4.01
   0  23  -9    0.36    1.94
   0 -23   9    2.21    2.02
   0 -23  -9    3.89    1.99
   0  23   9    2.74    1.97
   0  23  10    1.16    1.88
   0 -23  10   -0.34    2.11
   0  23 -10   -0.10    2.02
   0 -23 -10   -0.77    1.77
   0 -23  11    2.64    2.27
   0  23  11    4.89    1.95
   0 -23 -11    4.82    2.04
   0  23 -11    2.33    1.96
   0  23  12   46.36    3.58
   0 -23 -12   52.50    3.76
   0 -23  12   56.68    4.34
   0  23 -12   50.45    3.89
   0 -23  13    2.28    2.28
   0 -23 -13    4.54    1.93
   0  23  13    0.85    1.89
   0  23 -13    4.01    2.36
   0  23 -14    1.07    2.30
   0 -23  14    6.49    2.80
   0  23  14    5.54    2.27
   0 -23 -14    5.08    2.27
   0  23 -15    2.06    2.28
   0 -23  15    1.31    2.46
   0  23  15    1.76    2.10
   0 -23 -15    1.88    2.09
   0  23 -16    5.07    2.55
   0 -23 -16    5.38    2.24
   0 -23  16    1.54    2.44
   0 -23 -17    9.36    2.44
   0  23 -17    9.61    2.73
   0 -23  17    3.36    2.68
   0 -23 -18   40.67    3.65
   0 -23  18   38.49    4.26
   0  23 -18   41.46    4.07
   0 -23  19   -1.32    2.58
   0  23 -19    0.51    2.31
   0 -23 -19    3.19    2.31
   0 -23  20   35.96    4.23
   0  23 -20   36.08    4.00
   0 -23 -20   28.94    3.52
   0 -23 -21   78.34    4.91
   0 -23  21   71.27    5.53
   0  23 -21   84.72    5.72
   0 -23 -22    6.16    2.46
   0 -23  22    6.85    3.07
   0  23 -22    5.68    2.80
   0 -23  23    7.86    3.23
   0 -23 -23    6.03    2.60
   0  23 -23    9.52    2.96
   0  23 -24   14.99    3.34
   0 -23  24   13.32    3.86
   0 -23 -24   25.26    3.67
   0  23 -25   15.40    3.55
   0 -23 -25   14.46    3.16
   0 -23  25   12.71    3.63
   0 -23 -26   22.90    3.58
   0 -23  26   25.28    4.43
   0  23 -26   17.80    3.83
   0 -23 -27    1.61    2.72
   0  23 -27   -4.96    3.25
   0  23 -28   20.41    4.07
   0 -23 -28   23.79    3.94
   0 -23 -29   41.33    4.50
   0  23 -29   39.02    5.03
   0  23 -30    5.07    3.44
   0 -23 -30    5.33    3.04
   0  23 -31   15.10    3.94
   0 -23 -31   24.05    4.17
   0 -23 -32    6.97    3.55
   0 -23 -33    5.50    3.34
   0 -23 -34   -4.21    3.69
   0 -23 -37    0.28    3.80
   0 -23 -38    2.01    4.16
   0 -24   0   46.52    3.62
   0  24   0   51.60    3.75
   0 -24   1    8.80    2.12
   0 -24  -1   13.26    2.42
   0  24   1   15.90    2.48
   0  24  -1    7.98    2.10
   0  24  -2    0.16    1.84
   0 -24  -2    0.33    1.83
   0 -24   2    0.75    1.98
   0  24   2    1.25    1.80
   0 -24  -3   16.65    2.55
   0  24   3   12.49    2.34
   0 -24   3   18.46    2.70
   0  24  -3    9.36    2.11
   0  24   4   19.76    2.66
   0  24  -4   16.79    2.64
   0 -24  -4   23.34    2.90
   0 -24   4   20.22    2.78
   0 -24  -5    4.83    2.01
   0  24   5    4.46    1.87
   0 -24   5    1.52    2.06
   0  24  -5    3.04    1.89
   0 -24   6    7.39    2.32
   0  24   6    7.31    2.25
   0  24  -6    8.07    2.40
   0 -24  -6    8.13    2.34
   0 -24  -7    3.64    2.05
   0  24  -7    2.89    2.15
   0 -24   7   -4.15    2.33
   0  24   7    0.98    1.93
   0 -24   8   18.84    2.98
   0  24  -8   22.60    3.01
   0 -24  -8   22.12    2.66
   0  24   8   24.18    2.97
   0  24   9    2.22    1.97
   0 -24   9    1.77    2.13
   0  24  -9   -0.33    2.12
   0 -24  -9    1.48    1.92
   0  24  10   14.50    2.72
   0  24 -10   16.11    2.97
   0 -24  10   14.18    2.85
   0 -24 -10   15.10    2.69
   0  24  11   43.40    3.64
   0 -24  11   47.68    4.12
   0 -24 -11   42.22    3.59
   0  24 -11   44.81    3.84
   0 -24 -12   40.82    3.53
   0 -24  12   29.47    3.47
   0  24  12   44.14    3.85
   0  24 -12   40.90    3.76
   0 -24 -13   31.45    3.26
   0 -24  13   29.49    3.51
   0  24 -13   31.66    3.58
   0  24  13   35.97    3.55
   0  24 -14   69.47    4.74
   0 -24 -14   70.06    4.43
   0 -24  14   65.43    4.93
   0  24  14   58.58    4.18
   0  24  15    9.74    2.49
   0 -24  15    7.86    2.91
   0 -24 -15    9.78    2.50
   0  24 -15    4.49    2.24
   0  24 -16    4.84    2.39
   0 -24 -16    8.30    2.35
   0  24  16    5.33    2.35
   0 -24  16    9.10    2.97
   0  24 -17    5.92    2.51
   0 -24  17    7.61    2.84
   0 -24 -17    7.17    2.49
   0  24 -18   -2.88    2.45
   0 -24 -18    0.00    2.16
   0 -24  18    4.60    2.85
   0 -24 -19   46.18    3.99
   0 -24  19   43.02    4.39
   0  24 -19   53.49    4.55
   0 -24  20    4.60    2.90
   0 -24 -20    7.81    2.62
   0  24 -20    5.59    2.69
   0  24 -21   28.91    3.92
   0 -24  21   32.27    4.26
   0 -24 -21   34.74    3.70
   0 -24 -22   69.91    5.01
   0  24 -22   67.08    5.34
   0 -24  22   71.66    5.87
   0 -24  23    5.82    3.30
   0 -24 -23    5.84    2.80
   0  24 -23   -0.01    2.63
   0  24 -24    9.53    3.16
   0 -24  24    7.30    3.47
   0 -24 -24   15.08    3.10
   0 -24 -25   20.59    3.60
   0  24 -25   19.69    3.79
   0 -24 -26    5.75    2.85
   0  24 -26    9.48    3.48
   0  24 -27   23.83    4.34
   0 -24 -27   24.40    3.78
   0  24 -28    7.19    3.57
   0 -24 -28    7.70    3.07
   0  24 -29   10.23    3.61
   0 -24 -29   11.46    3.28
   0  24 -30   12.24    3.94
   0 -24 -30   -0.02    2.95
   0 -24 -31    2.87    3.09
   0 -24 -32   -2.49    3.58
   0 -24 -33    2.61    3.34
   0 -24 -37    6.80    4.21
   0 -25   0    0.45    1.94
   0  25   0    0.83    1.91
   0  25  -1    5.49    2.20
   0 -25  -1    5.56    2.15
   0  25   1    7.42    2.27
   0 -25   1    5.42    2.15
   0  25  -2   -0.55    1.94
   0  25   2   -1.53    1.88
   0 -25   2    0.41    1.97
   0 -25  -2    1.80    1.97
   0  25   3   54.29    3.90
   0 -25  -3   54.41    3.81
   0 -25   3   58.10    4.10
   0  25  -3   54.48    4.08
   0  25   4    1.76    2.06
   0 -25   4   -0.94    2.01
   0 -25  -4   -0.40    1.97
   0  25  -4    2.22    2.25
   0  25   5  126.54    5.74
   0  25  -5  131.47    5.95
   0 -25   5  129.22    5.80
   0 -25  -5  136.42    5.66
   0  25  -6   19.70    3.05
   0 -25   6   22.37    3.12
   0 -25  -6   21.73    2.84
   0  25   6   15.22    2.66
   0 -25   7   24.60    3.35
   0  25  -7   24.94    3.26
   0  25   7   24.31    3.16
   0 -25  -7   21.46    2.89
   0 -25   8   -2.15    2.42
   0  25   8    3.67    2.08
   0 -25  -8   -1.55    2.00
   0  25  -8    3.43    2.22
   0 -25  -9   24.89    2.86
   0  25   9   22.03    2.98
   0  25  -9   25.90    3.27
   0 -25   9   28.21    3.48
   0 -25  10   21.02    3.28
   0  25 -10   16.23    2.97
   0 -25 -10   15.51    2.76
   0  25  10   15.60    2.81
   0  25 -11    0.00    2.18
   0 -25 -11    0.46    2.11
   0 -25  11    2.47    2.51
   0  25  11    2.21    2.23
   0  25 -12   26.47    3.34
   0  25  12   26.80    3.22
   0 -25  12   25.49    3.51
   0 -25 -12   28.72    3.20
   0 -25 -13   44.92    3.73
   0 -25  13   48.13    4.51
   0  25  13   42.09    3.78
   0  25 -13   44.04    3.98
   0 -25 -14    2.59    2.16
   0 -25  14    1.67    2.54
   0  25 -14    5.21    2.55
   0  25  14   -1.74    2.13
   0 -25  15    5.46    2.70
   0  25  15    3.90    2.34
   0 -25 -15    5.67    2.25
   0  25 -15    1.66    2.20
   0  25  16    5.31    2.23
   0  25 -16    5.20    2.70
   0 -25  16    7.70    2.92
   0 -25 -16    4.17    2.37
   0  25 -17    0.75    2.61
   0 -25  17    1.69    2.77
   0 -25 -17    1.89    2.17
   0  25 -18   36.17    4.19
   0 -25  18   35.80    4.53
   0 -25 -18   30.81    3.62
   0 -25 -19    7.78    2.72
   0 -25  19   13.27    3.79
   0  25 -19   11.60    3.31
   0  25 -20   54.87    4.81
   0 -25 -20   55.00    4.40
   0 -25  21   23.03    4.03
   0 -25 -21   23.66    3.37
   0  25 -21   28.30    3.81
   0 -25  22   -3.16    3.17
   0 -25 -22    4.53    2.66
   0  25 -22    5.27    3.06
   0  25 -23    2.83    3.07
   0 -25  23   -1.04    3.09
   0 -25 -23    0.50    2.49
   0  25 -24    2.17    2.95
   0 -25 -24    0.76    2.59
   0  25 -25   14.24    3.52
   0 -25 -25    7.41    2.90
   0  25 -26   29.56    4.43
   0 -25 -26   22.58    3.63
   0 -25 -27    1.79    2.84
   0  25 -27    5.03    3.32
   0 -25 -28   15.43    3.78
   0  25 -28   17.00    4.05
   0 -25 -29   16.02    3.73
   0  25 -29   17.12    4.04
   0 -25 -30    0.82    3.01
   0 -25 -31    2.72    3.12
   0 -25 -32   -4.47    3.50
   0  26   0   -0.39    1.93
   0 -26   0   -0.34    2.13
   0  26  -1    9.58    2.52
   0 -26   1    6.15    2.35
   0 -26  -1   11.33    2.56
   0  26   1   11.09    2.51
   0 -26  -2   68.44    4.29
   0  26  -2   76.67    4.74
   0 -26   2   67.80    4.48
   0  26   2   71.02    4.56
   0 -26  -3    5.95    2.53
   0  26  -3    6.21    2.32
   0 -26   3    5.00    2.36
   0  26   3    4.10    2.22
   0  26   4   65.56    4.43
   0 -26  -4   62.10    4.17
   0  26  -4   64.18    4.46
   0 -26   4   62.21    4.34
   0 -26   5    0.15    2.15
   0  26   5    0.40    1.99
   0 -26  -5   -0.02    2.19
   0  26  -5    0.95    2.03
   0 -26   6   15.43    3.04
   0  26  -6    9.04    2.50
   0 -26  -6    7.80    2.40
   0  26   6    7.75    2.28
   0  26   7    1.78    2.28
   0  26  -7   -1.04    2.12
   0 -26  -7    0.06    2.02
   0 -26   7   -0.25    2.33
   0 -26  -8    3.79    2.24
   0  26   8    1.90    2.20
   0  26  -8   -1.29    2.17
   0 -26  -9    2.53    2.17
   0  26   9    1.21    2.11
   0 -26   9    3.06    2.44
   0  26  -9   -1.06    2.15
   0  26  10    1.07    2.17
   0  26 -10   -0.71    2.10
   0 -26  10    2.86    2.37
   0 -26 -10    3.71    2.29
   0 -26 -11    2.83    2.18
   0  26  11    3.92    2.21
   0 -26  11    1.07    2.53
   0  26 -11    5.13    2.62
   0 -26  12   95.00    5.76
   0 -26 -12   96.00    5.06
   0  26 -12   95.84    5.60
   0  26  13    7.73    2.35
   0 -26 -13    7.87    2.37
   0  26 -13    8.36    2.67
   0 -26  13    8.63    2.90
   0 -26  14    7.41    2.87
   0 -26 -14    8.24    2.46
   0  26  14   11.13    2.89
   0  26 -14    4.84    2.38
   0  26 -15    1.24    2.62
   0 -26  15    1.28    2.62
   0  26  15    1.57    2.27
   0 -26 -15    4.08    2.41
   0 -26  16    5.03    2.95
   0  26 -16    3.08    2.50
   0 -26 -16    4.03    2.48
   0  26  16    4.52    2.67
   0  26 -17    4.41    2.61
   0 -26  17   -0.16    2.74
   0 -26 -17    2.26    2.42
   0  26 -18    8.45    3.08
   0 -26 -18    8.98    2.54
   0 -26  18    9.77    3.33
   0 -26  19   18.61    3.83
   0 -26 -19   25.38    3.46
   0  26 -19   26.01    3.90
   0  26 -20   17.75    3.67
   0 -26 -20   16.03    3.35
   0 -26  20   21.74    4.03
   0  26 -21   -5.92    2.93
   0 -26  21    2.94    3.16
   0 -26 -21   -1.96    2.53
   0  26 -22    3.70    2.82
   0 -26  22    4.98    3.39
   0 -26 -22    9.62    3.12
   0 -26 -23    0.55    2.45
   0  26 -23    6.26    3.32
   0  26 -24    4.20    3.02
   0 -26 -24   -3.91    2.90
   0  26 -25    3.26    3.32
   0 -26 -25   -0.49    2.87
   0  26 -26   -0.28    3.26
   0 -26 -26    2.09    2.82
   0 -26 -27    3.91    3.19
   0  26 -27   -1.60    3.10
   0  26 -28   -0.38    3.21
   0 -26 -28    3.67    3.07
   0 -26 -29    0.34    3.15
   0 -26 -30    4.62    3.44
   0 -26 -31    2.93    3.47
   0 -27   0   -2.01    2.11
   0  27   0   -0.61    1.96
   0 -27   1    4.79    2.43
   0  27  -1    3.02    2.10
   0  27   1    1.00    2.03
   0 -27  -1    3.47    2.20
   0  27  -2   12.92    2.72
   0 -27  -2    9.93    2.55
   0 -27   2    5.50    2.27
   0  27   2    7.02    2.40
   0 -27   3   28.76    3.41
   0  27  -3   29.94    3.37
   0  27   3   30.26    3.30
   0 -27  -3   29.48    3.41
   0  27  -4   16.83    2.86
   0  27   4   15.41    2.80
   0 -27  -4   15.79    2.76
   0 -27   4   16.78    2.99
   0  27  -5   29.86    3.51
   0  27   5   32.88    3.62
   0 -27   5   26.81    3.34
   0 -27  -5   27.61    3.17
   0  27   6   -0.11    2.24
   0  27  -6   -0.16    2.16
   0 -27  -6    1.62    2.09
   0 -27   6   -1.71    2.21
   0 -27   7    1.59    2.30
   0  27   7   -1.04    2.07
   0  27  -7    1.57    2.40
   0 -27  -7   -1.97    2.23
   0 -27  -8    0.11    2.02
   0 -27   8    0.16    2.39
   0  27  -8   -0.20    2.20
   0  27   8   -1.67    2.19
   0  27  -9    4.97    2.54
   0  27   9   -1.92    2.19
   0 -27  -9    1.57    2.14
   0 -27   9   -0.19    2.34
   0  27  10    6.14    2.49
   0  27 -10    4.67    2.46
   0 -27 -10    4.43    2.18
   0 -27  10    5.25    2.68
   0 -27  11    1.10    2.54
   0  27 -11    1.55    2.22
   0 -27 -11    1.87    2.23
   0  27  11   -2.24    2.39
   0 -27  12    4.64    2.87
   0 -27 -12   -3.67    2.23
   0  27  12    3.96    2.47
   0  27 -12   -3.18    2.63
   0 -27 -13   18.28    2.86
   0 -27  13   23.24    3.81
   0  27 -13   20.75    3.32
   0  27  13   26.04    3.36
   0 -27 -14    9.83    2.69
   0  27  14   10.88    2.74
   0  27 -14   12.09    2.97
   0 -27  14   10.19    3.03
   0  27  15    7.10    2.62
   0 -27  15   10.25    3.36
   0 -27 -15    4.31    2.32
   0  27 -15    3.98    2.70
   0  27  16    3.56    2.32
   0  27 -16    9.92    2.99
   0 -27  16    6.49    3.18
   0 -27 -16    5.60    2.51
   0 -27  17    1.74    2.90
   0 -27 -17    0.57    2.29
   0  27 -17    6.15    2.76
   0  27 -18    2.50    2.72
   0 -27 -18    5.30    2.66
   0 -27  18    7.05    3.36
   0  27 -19    9.93    3.16
   0 -27  19    5.52    3.21
   0 -27 -19   11.90    2.90
   0 -27 -20    3.40    2.63
   0  27 -20    0.20    2.68
   0 -27  20    0.42    3.07
   0  27 -21    1.57    2.73
   0 -27 -21    1.62    2.49
   0 -27 -22    6.22    2.81
   0  27 -22    9.75    3.34
   0 -27 -23   -0.21    2.79
   0  27 -23    6.44    3.53
   0 -27 -24    9.72    3.12
   0  27 -24   12.15    3.39
   0 -27 -25   14.59    3.58
   0  27 -25   19.44    4.01
   0 -27 -26    6.11    3.04
   0  27 -26   -3.80    3.51
   0  27 -27    2.74    3.20
   0 -27 -27    9.54    3.56
   0 -27 -28    1.00    3.13
   0 -27 -29    2.88    3.23
   0 -27 -30    5.72    3.68
   0  28   0    5.71    2.44
   0 -28   0   -0.50    2.15
   0  28  -1    6.50    2.53
   0 -28  -1    7.80    2.68
   0  28   1    6.99    2.49
   0 -28   1    5.69    2.56
   0 -28   2   10.88    2.86
   0 -28  -2   11.39    2.71
   0  28   2    2.00    2.30
   0  28  -2    7.75    2.56
   0  28   3    2.11    2.13
   0  28  -3   -2.67    2.29
   0 -28   3   -0.86    2.25
   0 -28  -3    2.32    2.37
   0 -28   4   17.81    3.14
   0  28  -4   16.01    2.89
   0 -28  -4   14.24    2.93
   0  28   4   14.15    2.69
   0  28   5   18.27    3.14
   0 -28   5   15.33    3.12
   0  28  -5   13.30    2.93
   0 -28  -5   14.85    2.94
   0 -28   6    4.14    2.50
   0  28   6    4.84    2.57
   0  28  -6    8.39    2.88
   0 -28  -6    6.00    2.46
   0 -28  -7    2.12    2.43
   0 -28   7   -2.01    2.37
   0  28   7    1.76    2.15
   0  28  -7    2.91    2.47
   0 -28  -8   14.75    2.89
   0 -28   8   10.71    2.95
   0  28  -8   21.63    3.39
   0  28   8   14.42    2.82
   0  28   9    4.13    2.20
   0 -28  -9    4.73    2.30
   0 -28   9    6.82    2.86
   0  28  -9    5.47    2.40
   0 -28  10   -0.67    2.56
   0 -28 -10   -0.09    2.27
   0  28  10    3.67    2.35
   0  28 -10    4.34    2.34
   0  28 -11    1.25    2.33
   0 -28 -11    0.44    2.28
   0 -28  11    3.69    2.82
   0  28  11    2.18    2.32
   0  28  12   26.68    3.44
   0  28 -12   22.40    3.58
   0 -28  12   16.03    3.48
   0 -28 -12   19.96    3.05
   0 -28  13    4.80    2.88
   0  28 -13    9.84    3.03
   0  28  13    6.40    2.58
   0 -28 -13    7.54    2.62
   0 -28  14   12.30    3.42
   0 -28 -14   15.23    2.93
   0  28 -14   10.50    2.86
   0  28  14   17.64    3.17
   0  28 -15   41.10    4.28
   0 -28 -15   45.63    4.10
   0  28  15   41.94    4.15
   0 -28  15   51.04    4.99
   0  28  16    9.00    2.97
   0  28 -16    6.43    2.77
   0 -28 -16    5.47    2.65
   0 -28  16   -1.44    3.00
   0  28 -17   -2.41    2.97
   0 -28  17    0.58    3.00
   0 -28 -17    2.71    2.55
   0 -28  18   31.61    4.55
   0 -28 -18   27.91    3.60
   0  28 -18   22.86    3.69
   0 -28  19   -1.48    3.16
   0  28 -19   -1.40    2.86
   0 -28 -19    4.12    2.71
   0  28 -20    0.66    2.79
   0 -28 -20    7.97    2.92
   0  28 -21   -1.36    2.86
   0 -28 -21   -2.83    2.67
   0  28 -22    0.48    3.12
   0 -28 -22    7.04    3.12
   0 -28 -23   22.38    3.90
   0  28 -23   21.85    4.26
   0 -28 -24    9.38    3.34
   0  28 -24    6.98    3.40
   0  28 -25    8.24    3.44
   0 -28 -25    7.96    3.27
   0 -28 -26    9.42    3.40
   0  28 -26   12.64    4.13
   0 -28 -27    0.68    3.06
   0 -28 -28   -6.95    3.39
   0 -29   0   -1.83    2.34
   0  29   0    1.64    2.41
   0 -29   1    6.86    2.48
   0  29   1    6.36    2.51
   0 -29  -1    4.39    2.47
   0 -29  -2   -2.38    2.35
   0  29  -2   -1.48    2.31
   0  29   2   -3.64    2.48
   0 -29   2    3.12    2.44
   0 -29  -3    9.51    2.66
   0  29  -3   16.61    3.30
   0  29   3   14.92    3.01
   0 -29   3   20.59    3.35
   0 -29   4    0.24    2.51
   0  29   4    1.56    2.31
   0  29  -4   -2.09    2.43
   0 -29  -4    0.09    2.35
   0  29   5    9.59    2.63
   0 -29  -5    6.81    2.68
   0  29  -5   13.96    3.15
   0 -29   5   10.54    2.92
   0 -29  -6   15.99    3.06
   0  29  -6   16.91    3.22
   0  29   6   15.15    2.78
   0 -29   6   14.36    3.15
   0  29  -7    2.90    2.71
   0 -29   7   -0.49    2.53
   0 -29  -7    8.01    2.72
   0  29   7    3.46    2.31
   0 -29   8   -3.10    2.64
   0  29   8   -2.53    2.46
   0  29  -8    4.35    2.51
   0 -29  -8    3.68    2.37
   0  29   9   19.66    3.14
   0 -29   9   14.35    3.32
   0  29  -9   10.89    2.81
   0 -29  -9   16.47    3.02
   0 -29 -10   -1.00    2.49
   0  29 -10    7.80    2.92
   0  29  10    2.28    2.32
   0 -29  10   -0.98    2.69
   0  29 -11    5.45    2.83
   0 -29 -11    2.43    2.30
   0  29  11    1.13    2.49
   0 -29  11   -0.97    2.69
   0  29  12    4.49    2.61
   0  29 -12    0.97    2.43
   0 -29  12    7.90    3.11
   0 -29 -12    0.47    2.34
   0  29  13    5.83    2.60
   0 -29  13    3.67    2.98
   0  29 -13    5.48    2.84
   0 -29 -13    4.40    2.79
   0  29 -14    3.88    2.68
   0 -29 -14    2.42    2.41
   0  29  14    5.27    2.72
   0 -29  14   -0.95    2.81
   0 -29  15   -0.78    2.97
   0  29 -15    0.44    2.78
   0  29  15   -0.99    2.48
   0 -29 -15    2.81    2.56
   0 -29 -16   17.11    3.22
   0  29  16   19.41    3.45
   0 -29  16   17.80    3.87
   0  29 -16   27.97    4.19
   0 -29  17    8.48    3.46
   0  29 -17   14.11    3.45
   0 -29 -17   10.28    2.89
   0  29 -18    4.63    2.99
   0 -29 -18    5.73    2.68
   0  29 -19    1.47    2.98
   0 -29 -19    1.28    2.75
   0 -29 -20    4.61    2.98
   0  29 -20    9.31    3.48
   0  29 -21    7.95    3.30
   0 -29 -21   -0.59    2.91
   0 -29 -22   24.60    3.84
   0  29 -22   21.49    4.13
   0 -29 -23   -3.44    3.21
   0  29 -23   -3.22    3.19
   0  29 -24   20.09    4.29
   0 -29 -24   18.93    3.89
   0 -29 -25    9.06    3.41
   0 -29 -26    2.60    3.28
   0 -29 -27    3.11    3.40
   0  30   0   55.79    4.57
   0 -30   0   56.07    4.60
   0 -30  -1    5.12    2.60
   0  30   1    9.35    2.67
   0  30  -1   11.13    2.83
   0 -30   1    5.18    2.56
   0 -30   2    3.96    2.78
   0  30   2    0.59    2.39
   0  30  -2    0.58    2.41
   0 -30  -2   -4.00    2.71
   0 -30  -3   -1.77    2.50
   0  30  -3    1.19    2.44
   0 -30   3   -0.86    2.45
   0  30   3    0.44    2.27
   0  30  -4   -2.45    2.48
   0  30   4    0.06    2.26
   0 -30  -4    0.11    2.36
   0 -30   4   -1.03    2.52
   0 -30  -5   -3.11    2.42
   0  30   5    0.57    2.30
   0  30  -5   -1.54    2.36
   0  30   6    6.21    2.72
   0 -30  -6    6.39    2.71
   0 -30   6    6.70    2.89
   0  30  -6    5.53    2.79
   0  30  -7    1.03    2.54
   0  30   7    4.41    2.55
   0 -30   7    3.68    2.66
   0 -30  -7   -3.09    2.51
   0 -30   8   46.37    4.73
   0 -30  -8   44.65    4.26
   0  30  -8   48.84    4.59
   0  30   8   45.96    4.28
   0  30  -9   -1.07    2.52
   0 -30  -9    1.97    2.49
   0 -30   9   -3.71    2.83
   0  30   9   -2.38    2.37
   0  30  10    3.70    2.64
   0 -30  10    0.26    2.78
   0  30 -10    4.54    2.71
   0 -30 -10    6.05    2.67
   0  30  11    0.13    2.60
   0 -30  11   -2.39    2.91
   0  30 -11   -1.95    2.66
   0 -30 -11    6.21    2.73
   0 -30  12    2.67    2.93
   0 -30 -12    3.80    2.72
   0  30  12    4.17    2.74
   0  30 -12    5.82    2.86
   0  30 -13    5.00    3.08
   0  30  13    5.44    2.82
   0 -30  13   10.87    3.42
   0 -30 -13    8.53    2.75
   0  30 -14    2.94    2.77
   0 -30  14    5.51    3.29
   0 -30 -14   -1.58    2.68
   0  30  14    2.26    2.85
   0 -30 -15   15.40    3.27
   0  30  15   23.45    3.68
   0  30 -15   25.93    4.24
   0 -30  15   21.58    4.27
   0  30 -16   20.49    3.94
   0 -30 -16   18.95    3.35
   0  30  16   19.54    3.62
   0 -30 -17    0.32    2.67
   0  30 -17    7.41    3.27
   0 -30 -18   36.17    4.13
   0  30 -18   35.31    4.47
   0  30 -19    7.91    3.29
   0 -30 -19    4.25    2.90
   0 -30 -20    0.14    2.78
   0  30 -20    1.86    3.12
   0  30 -21    2.01    3.16
   0 -30 -21    7.48    3.22
   0 -30 -22    4.35    3.33
   0  30 -22    1.34    3.11
   0 -30 -23    3.62    3.21
   0  30 -23    7.40    3.67
   0 -30 -24    4.26    3.32
   0 -30 -25    5.64    3.41
   0  31   0    5.56    2.75
   0 -31   0    1.02    2.55
   0 -31  -1   38.36    4.14
   0  31   1   35.52    4.19
   0  31  -1   34.64    3.94
   0 -31   1   31.39    4.01
   0 -31   2    1.64    2.56
   0 -31  -2    0.23    2.52
   0  31  -2    0.86    2.41
   0  31   2   -0.08    2.44
   0  31   3    5.04    2.85
   0  31  -3    0.60    2.72
   0 -31   3   -0.95    2.72
   0 -31  -3   -0.46    2.50
   0 -31   4    0.88    2.76
   0  31  -4    3.42    2.56
   0  31   4    1.46    2.47
   0 -31  -4   -2.69    2.52
   0  31   5    3.56    2.58
   0  31  -5    7.11    2.85
   0 -31   5    4.94    3.00
   0 -31  -5   -3.06    2.68
   0  31  -6    5.46    2.69
   0  31   6    1.81    2.58
   0 -31  -6    8.51    2.86
   0 -31   6    5.60    2.83
   0  31   7   13.64    3.09
   0  31  -7   20.23    3.50
   0 -31  -7   10.13    2.91
   0 -31   7   13.03    3.37
   0  31  -8    8.23    3.06
   0  31   8    9.93    3.06
   0 -31  -8    3.96    2.57
   0 -31   8   11.78    3.30
   0  31   9   50.63    4.72
   0  31  -9   48.48    4.76
   0 -31  -9   46.74    4.42
   0 -31   9   43.94    4.79
   0  31 -10    3.67    2.59
   0 -31 -10   -2.57    2.49
   0 -31  10   -1.98    3.22
   0 -31 -11    4.77    2.82
   0  31 -11    2.67    2.60
   0  31  11   -1.10    2.91
   0 -31  11    2.49    3.11
   0  31  12    3.71    2.65
   0 -31  12   -4.71    3.56
   0  31 -12    1.73    2.99
   0 -31 -12    3.05    2.62
   0 -31 -13   10.20    2.98
   0  31  13    3.69    2.67
   0 -31  13    7.90    3.41
   0  31 -13    5.77    3.10
   0 -31 -14    3.49    2.86
   0  31  14    1.12    2.67
   0  31 -14    4.13    3.18
   0 -31 -15    7.43    2.80
   0  31  15    4.59    2.77
   0  31 -15    3.16    2.89
   0  31  16    1.74    2.72
   0 -31 -16   -3.49    2.97
   0  31 -16    4.15    3.15
   0 -31 -17    6.04    3.06
   0  31 -17    7.17    3.28
   0 -31 -18    3.39    2.99
   0  31 -18    5.84    3.42
   0  31 -19    6.37    3.50
   0 -31 -19   -1.75    2.73
   0 -31 -20    4.62    3.09
   0  31 -20   -0.36    3.26
   0 -31 -21    1.04    2.98
   0  31 -21    6.35    3.73
   0 -31 -22    0.65    2.97
   0 -31 -23    7.11    3.56
   0 -32   0   43.60    4.47
   0  32   0   42.61    4.56
   0 -32  -1    2.95    2.64
   0  32   1    4.56    2.73
   0 -32   1    7.01    3.17
   0  32  -1    0.44    2.69
   0  32   2    6.79    2.89
   0 -32   2    8.52    3.25
   0 -32  -2    6.36    2.89
   0  32  -2   13.55    3.26
   0  32  -3    5.50    2.77
   0  32   3    4.31    2.82
   0 -32  -3    3.18    2.65
   0 -32   3    1.15    2.72
   0 -32   4    5.75    3.20
   0 -32  -4    0.69    2.58
   0  32  -4    6.02    2.97
   0  32   4    6.90    2.85
   0 -32  -5    8.98    3.17
   0  32   5   -0.90    2.78
   0 -32   5    7.89    3.05
   0  32  -5    0.48    2.71
   0  32   6   14.82    3.44
   0  32  -6   12.31    3.35
   0 -32   6    8.66    3.11
   0 -32  -6   16.65    3.48
   0  32   7   -0.69    2.73
   0 -32  -7    4.42    2.75
   0 -32   7    7.85    3.43
   0  32  -7    6.40    2.89
   0  32  -8   10.90    3.22
   0 -32  -8    8.14    3.07
   0  32   8   11.56    3.17
   0 -32   8   10.00    3.34
   0 -32  -9    4.69    2.89
   0  32   9    2.65    2.59
   0  32  -9    1.66    2.99
   0 -32   9    0.00    3.07
   0  32 -10    6.57    3.13
   0 -32 -10   10.27    3.28
   0  32  10    6.97    2.87
   0 -32  10    7.17    3.47
   0  32  11    6.60    3.29
   0 -32  11    4.09    3.42
   0 -32 -11   12.92    3.39
   0  32 -11   10.67    3.51
   0  32  12    1.25    2.74
   0  32 -12   -2.38    3.05
   0 -32 -12   -2.78    2.86
   0  32 -13    0.46    3.04
   0  32  13    5.17    3.03
   0 -32 -13   -0.72    2.63
   0 -32 -14   -4.75    3.00
   0  32 -14   -3.14    3.02
   0  32  15    5.03    3.00
   0 -32 -15    4.71    2.88
   0  32 -15    7.37    3.63
   0  32 -16   15.35    3.95
   0 -32 -16    6.96    3.11
   0  32  16   10.74    3.54
   0 -32 -17   -0.20    2.91
   0  32 -17   -3.34    3.35
   0  32 -18    2.09    3.37
   0 -32 -18    6.98    3.17
   0  32 -19    1.45    3.35
   0 -32 -19    5.09    3.20
   0  32 -20    1.98    3.49
   0 -32 -20    4.25    3.14
   0 -32 -21    7.48    3.43
   0  33   0    0.99    2.74
   0 -33   0    5.55    3.24
   0  33   1    9.82    3.05
   0 -33   1    7.05    3.16
   0  33  -1   18.88    3.84
   0 -33  -1   18.55    3.68
   0 -33  -2    5.42    2.97
   0  33   2   11.63    3.53
   0  33  -2    5.24    2.95
   0 -33   2    6.34    3.31
   0 -33  -3    0.84    2.83
   0  33   3    0.22    2.80
   0  33  -3    1.71    2.93
   0 -33   3    5.28    2.98
   0 -33  -4   -0.39    2.84
   0 -33   4    2.01    2.94
   0  33   4   -1.30    2.78
   0  33  -4    2.41    2.87
   0  33  -5   -3.08    2.79
   0 -33   5    1.56    3.02
   0 -33  -5    1.11    2.81
   0  33   5    4.19    3.12
   0 -33  -6    2.35    2.74
   0  33  -6    1.73    2.71
   0 -33   6   10.10    3.46
   0  33   6    2.30    2.64
   0 -33  -7    0.77    2.76
   0  33   7   -0.45    2.75
   0 -33   7    4.89    3.45
   0  33  -7   -1.50    2.87
   0 -33  -8    2.22    2.74
   0 -33   8    0.79    3.01
   0  33   8   -0.33    2.75
   0  33  -8   -0.76    2.86
   0  33  -9    5.15    3.15
   0  33   9    1.12    2.88
   0 -33  -9    4.33    3.04
   0  33 -10    2.96    2.98
   0  33  10    3.23    2.85
   0 -33 -10    6.55    3.22
   0 -33 -11    3.39    2.88
   0  33 -11   -0.78    3.10
   0  33  11   -1.72    2.79
   0  33  12    0.08    2.94
   0  33 -12    0.87    3.05
   0 -33 -12    3.19    2.95
   0 -33 -13    2.32    2.92
   0  33  13    1.67    2.75
   0  33 -13   -1.41    3.05
   0 -33 -14    5.88    3.33
   0  33 -14    5.50    3.61
   0  33  14    1.69    2.83
   0  33 -15   -0.38    3.46
   0 -33 -15    0.32    2.98
   0  33  15    5.23    3.26
   0  33  16    1.80    3.08
   0  33 -16   -1.19    3.34
   0 -33 -16   -4.22    3.25
   0 -33 -17   -4.17    3.31
   0  33 -17    2.75    3.66
   0 -33 -18   12.57    3.60
   0  33 -18   15.35    4.42
   0 -33 -19    1.23    3.13
   0 -34   0    5.96    3.34
   0  34   0    1.35    2.77
   0 -34   1   -3.60    3.30
   0 -34  -1   -1.29    3.03
   0  34  -1   -3.01    3.11
   0  34   1   -4.32    3.12
   0 -34  -2   -4.75    3.24
   0 -34   2   -1.74    3.14
   0  34   2   -0.45    2.91
   0  34  -2    2.08    3.11
   0 -34   3    7.95    3.51
   0  34  -3    6.11    3.19
   0 -34  -3    7.13    3.17
   0  34   3    8.11    3.17
   0 -34  -4    7.87    3.33
   0  34  -4    5.40    3.30
   0  34   4    5.38    3.14
   0 -34   4    3.41    3.21
   0  34  -5    1.11    2.91
   0 -34   5    1.96    3.13
   0 -34  -5   -0.27    2.91
   0  34   5   -0.92    2.77
   0  34   6   -1.02    3.09
   0 -34  -6   -0.43    2.94
   0  34  -6    0.03    2.90
   0  34   7    0.12    2.94
   0 -34  -7    3.75    2.94
   0  34  -7    1.09    3.03
   0 -34  -8    0.42    2.88
   0  34   8    7.32    3.14
   0  34  -8   -1.17    3.26
   0  34   9   10.23    3.68
   0 -34  -9    6.57    3.37
   0  34  -9    2.42    2.96
   0  34  10    3.48    3.07
   0  34 -10    3.35    3.36
   0 -34 -10   -3.27    3.06
   0  34 -11   11.36    3.83
   0 -34 -11    1.89    3.17
   0  34  11   11.68    3.56
   0 -34 -12   17.58    3.84
   0  34  12   14.01    3.82
   0  34 -12    4.68    3.32
   0  34 -13   -1.89    3.30
   0 -34 -13    5.54    3.24
   0  34  13    1.06    3.14
   0  34 -14    2.27    3.27
   0 -34 -14    2.69    3.18
   0  34  14   -3.69    3.29
   0 -34 -15    5.54    3.23
   0  34  15    2.61    3.12
   0  34 -15    0.11    3.27
   0  34 -16   -0.59    3.32
   0  34  16   -3.36    3.43
   0 -34 -16   -6.29    3.52
   0 -35   0    3.81    3.30
   0  35   0    2.34    2.92
   0  35   1    1.16    3.18
   0 -35  -1    4.55    3.29
   0  35  -1   -0.43    3.01
   0 -35   1   -1.25    3.17
   0 -35  -2    5.05    3.31
   0  35  -2    4.46    3.26
   0  35   2    9.65    3.57
   0  35  -3    6.64    3.35
   0 -35  -3   -0.05    3.12
   0  35   3    3.78    3.45
   0  35  -4   -2.70    3.36
   0  35   4   -0.79    2.93
   0 -35  -4   -1.75    3.05
   0  35  -5   -2.78    3.28
   0 -35  -5   -4.39    3.19
   0  35   5   -2.29    2.98
   0  35   6    2.68    3.06
   0  35  -6    1.48    3.19
   0  35  -7    7.69    3.74
   0 -35  -7   -0.68    3.03
   0  35   8   -0.27    3.24
   0  35  -8   -0.32    3.13
   0 -35  -8    2.23    3.15
   0 -35  -9    3.26    3.17
   0  35   9   -2.45    3.14
   0  35  -9    0.66    3.39
   0  35  10    0.29    3.04
   0  35 -10   -3.47    3.39
   0 -35 -10    7.10    3.48
   0 -35 -11    1.04    3.07
   0  35 -11    5.55    3.69
   0  35  11    4.13    3.40
   0 -35 -12   -0.34    3.12
   0  35  12    4.53    3.66
   0  35 -12   -4.98    3.69
   0 -35 -13   11.83    3.75
   0  35  13   17.11    4.18
   0  35 -13   18.19    4.46
   0  35  14    0.60    3.20
   0  35  15   -0.42    3.26
   0  36   0    8.87    3.62
   0  36  -1    8.21    3.58
   0  36   1    7.06    3.52
   0  36  -2    7.41    3.56
   0  36   2    4.86    3.34
   0  36   3   -1.55    3.17
   0  36  -3    1.87    3.26
   0  36   4   11.30    3.97
   0  36  -4    8.33    3.49
   0  36   5    1.99    3.07
   0  36   6    0.13    3.16
   0  36  -6    0.27    3.27
   0  36  -7    2.90    3.44
   0  36   7   -0.65    3.17
   0  36   8    1.64    3.25
   0  36   9    3.30    3.34
   0  36  -9    3.20    3.37
   0  36 -10    9.17    3.80
   0  36 -11    5.73    3.69
   0  36  11    2.50    3.38
   0  36  12    6.59    3.54
   0  36  13   -4.04    3.68
   0  36  14   -2.55    3.56
   0  37   0    0.05    3.35
   0  37   1   -0.05    3.33
   0  37  -1    2.10    3.45
   0  37  -2    5.31    3.65
   0  37   2    1.99    3.65
   0  37   3   -1.40    3.40
   0  37  -4   -1.89    3.33
   0  37   4    4.39    3.48
   0  37   5    5.18    3.61
   0  37  -6   -6.06    3.83
   0  37  -7    1.20    3.44
   0  37   7    1.17    3.33
   0  37   8   -4.77    3.79
   0  37  -8    1.03    3.66
   0  37   9   -2.68    3.69
   0  37  10    1.64    3.49
   0  37  11    7.99    3.87
   0  38   0    8.10    4.11
   0  38  -1   -2.18    3.66
   0  38  -2    6.81    3.96
   0  38   2    1.10    3.53
   0  38   3   -1.49    3.57
   0  38  -3   -1.12    3.78
   0  38  -4   -3.01    3.89
   0  38   4   -0.65    3.48
   0  38   5    1.60    3.63
   0  38   6    6.75    3.95
   0  38   7    7.54    3.88
   1   0 -43   -3.66    3.81
   1   0 -42   26.19    5.04
   1   0 -41    0.21    3.38
   1   0 -40    6.40    3.63
   1   0 -39   -0.10    3.12
   1   0 -38  110.40    7.14
   1   0 -37   -2.64    2.91
   1   0 -36   24.22    4.05
   1   0 -35   -1.44    2.89
   1   0 -34  134.89    7.08
   1   0 -33   -0.32    2.65
   1   0 -32   64.66    5.10
   1   0 -31   -0.76    2.49
   1   0 -30    5.27    2.81
   1   0 -29   -0.08    2.24
   1   0 -28    6.34    2.59
   1   0 -27   -0.51    2.03
   1   0 -26  472.10   10.93
   1   0 -25   -0.16    1.85
   1   0 -24  130.69    5.56
   1   0 -23    1.45    1.82
   1   0 -22   31.09    2.90
   1   0 -21    3.16    1.69
   1   0 -20  476.98    9.41
   1   0 -19    1.88    1.52
   1   0 -18 1831.49   17.35
   1   0 -17   -0.45    1.38
   1   0 -16  614.52    9.47
   1   0 -15    1.13    1.30
   1   0 -14 1040.12   11.44
   1   0 -13    4.16    1.40
   1   0 -12 1840.60   14.02
   1   0 -11   -1.83    1.13
   1   0   4   58.19    1.33
  -1   0  -4   -0.16    0.18
   1   0   5    0.17    0.47
  -1   0  -6    3.60    0.75
   1   0   6    3.57    0.77
  -1   0  -7    1.32    0.76
   1   0   7    0.82    0.85
   1   0   8 1466.87    9.59
  -1   0  -8 1480.05    9.58
   1   0   9    0.52    0.85
  -1   0  -9    1.51    0.89
   1   0  10   75.48    2.56
  -1   0 -10   83.67    2.66
  -1   0 -11   18.88    2.00
   1   0  11   10.91    1.58
  -1   0 -13   13.70    1.88
  -1   0 -14   88.60    3.29
  -1   0 -15    4.39    1.65
  -1   0 -16  973.04   11.38
  -1   0 -17    4.36    1.71
  -1   0 -18  100.79    4.14
  -1   0 -19    0.44    1.43
  -1   0 -20  325.72    7.58
  -1   0 -21    6.34    2.10
  -1   0 -22   40.64    3.13
  -1   0 -23    3.51    1.99
  -1   0 -24   55.07    3.84
  -1   0 -25    0.90    1.87
  -1   0 -26    2.05    1.97
  -1   0 -27    0.80    1.92
  -1   0 -28  357.55    9.55
  -1   0 -29    9.39    2.91
  -1   0 -30  225.82    7.98
  -1   0 -31   -5.24    2.75
  -1   0 -32   19.65    3.63
  -1   0 -33   -1.45    2.63
  -1   0 -34    7.97    3.24
  -1   0 -35    2.35    2.70
  -1   0 -36    4.12    2.73
  -1   0 -37    2.84    3.09
  -1   0 -38  177.37    8.63
  -1   0 -39    0.70    3.11
  -1   0 -40   16.13    3.82
  -1   0 -41    1.26    3.19
  -1   0 -42   10.75    3.83
  -1   0 -43    4.20    3.73
  -1   0 -44    1.83    3.83
   1  -1 -43   10.51    4.53
   1   1 -43    5.38    3.85
   1   1 -42   14.81    4.16
   1  -1 -42   16.26    4.31
   1   1 -41    1.92    3.37
   1  -1 -41    5.41    3.42
   1   1 -40    1.97    3.42
   1  -1 -40    4.33    3.49
   1  -1 -39   18.85    3.99
   1   1 -39   14.98    3.63
   1  -1 -38    1.52    3.02
   1   1 -38    1.56    3.10
   1  -1 -37   12.48    3.62
   1   1 -37    6.12    2.97
   1   1 -36    2.46    3.03
   1  -1 -36    0.85    2.85
   1   1 -35   36.93    4.41
   1  -1 -35   41.36    4.85
   1  -1 -34    4.19    2.93
   1   1 -34    6.45    2.95
   1  -1 -33  163.55    7.64
   1   1 -33  147.43    7.26
   1   1 -32   93.85    5.77
   1  -1 -32  109.21    6.48
   1   1 -31   -2.83    2.52
   1  -1 -31    1.39    2.52
   1  -1 -30   50.87    4.45
   1   1 -30   46.40    4.37
   1   1 -29   -1.20    2.46
   1  -1 -29    0.68    2.27
   1   1 -28   82.34    5.14
   1  -1 -28   83.60    5.18
   1   1 -27  160.20    6.76
   1  -1 -27  162.44    6.66
   1  -1 -26   25.11    3.25
   1   1 -26   27.43    3.34
   1  -1 -25  410.03    9.84
   1   1 -25  415.83    9.91
   1   1 -24    0.66    1.79
   1  -1 -24    0.81    1.84
   1   1 -23   71.85    4.26
   1  -1 -23   74.92    4.23
   1  -1 -22    9.06    2.39
   1   1 -22    5.62    2.12
   1  -1 -21  114.80    4.96
   1   1 -21  119.80    5.03
   1  -1 -20  186.95    6.07
   1   1 -20  174.36    5.79
   1   1 -19   53.75    3.29
   1  -1 -19   47.66    3.13
   1  -1 -18  563.54    9.62
   1   1 -18  553.83    9.53
   1  -1 -17  870.86   11.62
   1   1 -17  849.29   11.43
   1  -1 -16    3.28    1.44
   1   1 -16    3.78    1.50
   1  -1 -15 1690.09   15.04
   1   1 -15 1674.32   14.95
   1   1 -14  197.66    5.05
   1  -1 -14  202.92    5.09
   1   1 -13    4.10    1.33
   1   1 -12  219.96    5.03
   1   1 -11  453.73    6.84
   1   1 -10  886.55    8.99
   1   1  -9  328.76    5.20
   1   1  -8  213.99    4.06
   1   1  -7    3.70    1.02
   1   1  -5   98.60    2.22
   1   1  -3   -0.01    0.15
   1  -1  -2    0.06    0.13
   1  -1   2   -0.09    0.13
  -1   1  -3    0.11    0.12
   1  -1   3   27.60    0.87
  -1  -1  -4   -0.60    0.25
  -1   1  -4   -0.31    0.24
  -1  -1  -5  660.25    4.75
   1  -1   6 1091.53    7.20
  -1  -1  -6 1055.64    6.80
  -1   1  -7  142.37    2.90
   1  -1   7  143.82    2.96
  -1  -1  -7  147.79    2.79
  -1   1  -9   51.27    2.06
  -1  -1  -9   53.90    2.04
   1  -1   9   54.51    2.15
  -1  -1 -10  156.87    3.50
  -1   1 -10  154.92    3.57
   1  -1  10  156.13    3.67
  -1   1 -11   39.92    2.13
  -1  -1 -11   43.31    2.06
   1  -1  11   39.49    2.12
  -1   1 -12   36.83    2.14
  -1  -1 -12   39.63    2.13
   1  -1  12   37.95    2.27
   1  -1  13   98.01    3.40
  -1  -1 -13  102.38    3.34
  -1   1 -13  108.25    3.55
  -1  -1 -14   45.62    2.48
  -1   1 -14   49.32    2.69
   1  -1  14   45.12    2.61
  -1  -1 -15   15.78    1.78
   1  -1  15   13.03    1.66
  -1   1 -15   16.06    1.87
  -1   1 -16    1.73    1.29
  -1  -1 -16    1.45    1.25
  -1   1 -17   56.09    3.06
  -1  -1 -17   57.03    3.05
  -1   1 -18  713.45   10.37
  -1  -1 -18  723.58   10.33
  -1   1 -19  288.63    6.86
  -1  -1 -19  291.70    6.88
  -1  -1 -20   52.45    3.31
  -1   1 -20   48.79    3.14
  -1  -1 -21  556.21    9.96
  -1   1 -21  537.15    9.79
  -1  -1 -22  242.21    6.90
  -1   1 -22  238.54    6.83
  -1   1 -23  146.11    5.61
  -1  -1 -23  157.33    5.72
  -1  -1 -24  104.19    4.97
  -1   1 -24  112.40    5.19
  -1   1 -25   32.88    3.15
  -1  -1 -25   37.67    3.33
  -1   1 -26   72.28    4.42
  -1  -1 -26   68.94    4.27
  -1   1 -27    4.17    2.25
  -1  -1 -27   -0.04    1.94
  -1   1 -28   18.26    3.27
  -1  -1 -28   16.71    3.09
  -1  -1 -29  160.05    6.62
  -1   1 -29  151.44    6.60
  -1  -1 -30   23.37    3.65
  -1   1 -30   26.54    3.68
  -1  -1 -31   85.86    5.38
  -1   1 -31   89.85    5.55
  -1  -1 -32  145.82    6.96
  -1   1 -32  150.57    7.12
  -1   1 -33   35.42    4.10
  -1  -1 -33   34.50    4.06
  -1  -1 -34  146.21    7.15
  -1   1 -34  145.95    7.21
  -1   1 -35   96.29    6.31
  -1  -1 -35   98.41    6.30
  -1  -1 -36   15.09    3.67
  -1   1 -36   14.52    3.48
  -1  -1 -37   21.97    3.72
  -1   1 -37   22.00    3.96
  -1   1 -38    1.52    3.19
  -1  -1 -38   -1.57    2.93
  -1   1 -39   65.02    5.66
  -1  -1 -39   57.60    5.47
  -1   1 -40   -3.01    3.40
  -1  -1 -40    2.37    3.16
  -1   1 -41    6.39    3.82
  -1  -1 -41    3.47    3.43
  -1  -1 -42    8.38    4.12
  -1   1 -42    8.68    3.91
  -1   1 -43   14.31    4.39
  -1  -1 -43    8.41    3.86
  -1  -1 -44    4.47    3.84
   1   2 -43   13.77    4.54
   1  -2 -43   13.35    4.58
   1  -2 -42   11.71    3.94
   1   2 -42   16.91    4.58
   1  -2 -41    9.54    3.91
   1   2 -41   12.88    4.05
   1   2 -40   -1.07    3.42
   1  -2 -40    1.32    3.35
   1  -2 -39    9.93    3.59
   1   2 -39    9.04    3.37
   1   2 -38   59.44    5.55
   1  -2 -38   63.39    5.77
   1   2 -37    9.41    3.77
   1  -2 -37    8.11    3.35
   1   2 -36   20.07    3.90
   1  -2 -36   16.58    3.72
   1  -2 -35   10.30    3.26
   1   2 -35   14.35    3.35
   1  -2 -34   58.26    5.15
   1   2 -34   52.79    4.86
   1  -2 -33    2.36    2.72
   1   2 -33    5.70    3.01
   1   2 -32   60.35    5.04
   1  -2 -32   62.38    5.09
   1   2 -31   30.61    3.75
   1  -2 -31   27.88    3.80
   1  -2 -30   71.59    5.02
   1   2 -30   70.78    4.98
   1   2 -29    3.09    2.60
   1  -2 -29    1.80    2.34
   1   2 -28   66.50    4.71
   1  -2 -28   60.41    4.42
   1  -2 -27    1.78    2.18
   1   2 -27    5.60    2.40
   1   2 -26   57.85    4.23
   1  -2 -26   57.67    4.13
   1   2 -25   16.85    2.70
   1  -2 -25   12.73    2.45
   1   2 -24  100.69    5.06
   1  -2 -24   98.18    4.90
   1   2 -23   22.19    3.88
   1  -2 -23   14.84    2.41
   1   2 -22   25.55    2.99
   1  -2 -22   25.14    3.09
   1  -2 -21   53.11    3.48
   1   2 -21   56.25    3.58
   1   2 -20   11.03    2.09
   1  -2 -20   11.82    2.17
   1  -2 -19   60.17    3.48
   1   2 -19   56.48    3.44
   1   2 -18  135.58    5.01
   1  -2 -18  130.32    4.80
   1  -2 -17   44.76    2.93
   1   2 -17   46.33    3.04
   1  -2 -16  398.63    7.59
   1   2 -16  400.41    7.72
   1   2 -15  588.51    9.08
   1   2 -14  625.20    8.95
   1   2 -13   58.14    2.88
   1   2 -12  821.84    9.52
   1   2 -11   19.98    1.69
   1   2 -10  256.84    4.92
   1   2  -9 1641.76   11.66
  -1  -2   9 1657.55   11.68
   1   2  -7  208.92    3.79
  -1  -2   7  147.81    3.19
   1   2  -6  182.18    3.33
  -1  -2   6  183.89    3.36
   1   2  -5  716.78    5.88
  -1  -2   5  750.98    6.12
   1  -2  -4  550.96    4.85
  -1  -2   4  503.00    4.61
   1  -2  -3   11.63    0.71
  -1  -2   3   13.55    0.73
  -1   2   2   -0.04    0.15
   1   2  -2    0.16    0.13
  -1   2   1   -0.26    0.16
   1  -2  -1   -0.37    0.21
   1  -2   0   -0.04    0.14
   1  -2   1   -0.11    0.18
  -1   2  -1   -0.18    0.14
  -1   2  -2   -0.08    0.11
  -1   2  -3   -0.26    0.21
   1  -2   3   26.61    0.99
   1  -2   4    0.08    0.44
   1  -2   5   35.64    1.35
  -1   2  -5   34.77    1.34
   1  -2   6   60.07    1.92
  -1   2  -6   58.57    1.87
   1  -2   7 1084.36    8.05
  -1  -2  -8  447.57    5.18
   1  -2   8  448.35    5.60
   1  -2   9 1254.36    9.79
  -1   2  -9 1221.11    9.56
  -1  -2  -9 1226.72    9.05
  -1   2 -10  170.48    3.88
  -1  -2 -10  173.23    3.73
   1  -2  10  166.83    3.82
  -1  -2 -11 1405.73   10.92
   1  -2  11 1401.44   11.38
  -1   2 -11 1423.50   11.38
  -1   2 -12  913.12    9.61
   1  -2  12  890.21    9.52
  -1  -2 -12  921.61    9.30
   1  -2  13  199.32    4.90
  -1   2 -13  204.24    4.88
   1  -2  14  369.69    6.74
  -1   2 -14  371.11    6.71
  -1  -2 -14  384.47    6.63
  -1   2 -15  260.25    5.84
  -1  -2 -15  265.16    5.77
   1  -2  15  264.55    5.99
   1  -2  16   22.60    2.19
  -1   2 -16   28.99    2.41
  -1  -2 -16   27.38    2.34
  -1  -2 -17  221.15    5.67
  -1   2 -17  221.80    5.77
   1  -2  17  214.51    5.82
  -1   2 -18  326.77    7.13
  -1  -2 -18  329.08    6.94
   1  -2  18  325.59    7.26
  -1   2 -19    8.94    1.88
  -1  -2 -19    7.44    1.64
  -1  -2 -20   18.37    2.21
  -1   2 -20   25.74    2.50
  -1   2 -21   40.73    3.18
  -1  -2 -21   42.81    3.07
  -1  -2 -22  788.93   12.20
  -1   2 -22  808.77   12.55
  -1  -2 -23   67.61    4.03
  -1   2 -23   66.10    4.10
  -1   2 -24  173.95    6.32
  -1  -2 -24  179.38    6.37
  -1   2 -25   23.67    2.76
  -1  -2 -25   27.38    2.86
  -1  -2 -26   51.39    3.78
  -1   2 -26   48.43    3.95
  -1   2 -27   -1.56    2.09
  -1  -2 -27   -1.22    1.98
  -1   2 -28   21.50    3.25
  -1  -2 -28   16.42    2.86
  -1  -2 -29    8.52    2.45
  -1   2 -29    6.34    2.48
  -1  -2 -30   79.53    5.14
  -1   2 -30   75.55    4.94
  -1  -2 -31   22.19    3.43
  -1   2 -31   23.41    3.32
  -1   2 -32   38.66    4.40
  -1  -2 -32   30.63    3.84
  -1   2 -33   41.45    4.38
  -1  -2 -33   43.83    4.43
  -1  -2 -34   21.81    3.50
  -1   2 -34   22.47    3.66
  -1  -2 -35   17.17    3.47
  -1   2 -35   12.98    3.45
  -1   2 -36    0.13    2.90
  -1  -2 -36   -0.12    2.75
  -1   2 -37    1.47    3.01
  -1  -2 -37   -1.98    2.75
  -1  -2 -38   22.51    3.98
  -1   2 -38   16.09    3.64
  -1   2 -39    0.27    3.04
  -1  -2 -39    1.20    3.21
  -1  -2 -40   11.24    3.69
  -1   2 -40    7.94    3.65
  -1  -2 -41   -1.42    3.34
  -1   2 -41    2.18    3.43
  -1  -2 -42   10.82    3.95
  -1   2 -42    4.89    3.72
  -1   2 -43    3.81    3.56
   1  -3 -43    3.05    3.75
   1  -3 -42   11.00    3.73
   1   3 -42   16.23    4.40
   1   3 -41   10.87    4.18
   1  -3 -41   11.82    3.96
   1   3 -40    9.49    3.68
   1  -3 -40    5.66    3.30
   1   3 -39   14.44    4.00
   1  -3 -39    7.90    3.66
   1   3 -38    2.23    3.09
   1  -3 -38    5.95    3.37
   1   3 -37   19.43    3.93
   1  -3 -37   19.99    3.85
   1  -3 -36    9.82    3.04
   1   3 -36   11.85    3.25
   1   3 -35    1.28    2.68
   1  -3 -35    1.62    2.70
   1  -3 -34   35.66    4.27
   1   3 -34   41.86    4.36
   1  -3 -33    3.47    2.68
   1   3 -33    1.49    2.79
   1   3 -32   75.34    5.44
   1  -3 -32   70.41    5.21
   1  -3 -31   96.40    5.76
   1   3 -31  102.45    6.04
   1   3 -30  255.46    8.75
   1  -3 -30  243.93    8.56
   1  -3 -29  375.33   10.23
   1   3 -29  384.46   10.50
   1   3 -28   91.74    5.27
   1  -3 -28   81.93    5.14
   1  -3 -27   -1.04    2.13
   1   3 -27   -1.09    2.12
   1   3 -26  144.22    6.18
   1  -3 -26  142.09    6.24
   1   3 -25  175.69    6.61
   1  -3 -25  175.49    6.68
   1  -3 -24   26.42    3.01
   1   3 -24   28.98    3.03
   1  -3 -23  231.67    7.17
   1   3 -23  238.09    7.35
   1   3 -22  423.06    9.35
   1  -3 -22  415.30    9.39
   1   3 -21  829.94   12.75
   1  -3 -21  853.37   12.77
   1  -3 -20    6.51    2.00
   1   3 -20    7.88    2.19
   1   3 -19   11.30    2.11
   1  -3 -19   10.18    1.87
   1   3 -18  182.55    5.70
   1   3 -17   43.74    2.95
   1   3 -16  124.03    4.45
   1   3 -15   10.76    1.92
   1   3 -14  390.32    7.21
   1   3 -13 1083.48   11.46
  -1  -3  13 1428.30   13.07
   1   3 -12    5.90    1.40
  -1  -3  12    3.37    1.26
   1   3 -11   21.45    1.77
  -1  -3  11   21.34    1.76
  -1  -3  10 1904.60   13.43
   1   3 -10 1846.74   13.23
   1   3  -9  113.76    3.33
  -1  -3   9   77.76    2.76
  -1  -3   8 1198.84    9.67
   1   3  -8 1165.10    9.54
   1   3  -7    2.82    0.98
  -1  -3   7    4.44    1.08
   1   3  -5 1158.16    7.74
   1  -3  -5 1188.21    8.02
  -1  -3   5 1160.34    7.82
  -1   3   4  197.81    3.11
   1  -3  -4  201.67    3.13
  -1  -3   4  202.40    3.02
   1   3  -4  205.02    3.04
  -1  -3   3  705.84    5.07
   1  -3  -3  706.46    5.41
   1   3  -2   13.65    0.75
   1  -3  -1  332.79    3.33
  -1   3   1   -0.23    0.25
   1  -3   0  186.96    2.44
  -1   3   0   -0.04    0.17
   1  -3   1   46.08    1.29
  -1   3  -1   -0.17    0.18
  -1   3  -2   -0.97    0.41
   1  -3   2  641.46    4.69
  -1   3  -3   11.73    0.76
   1  -3   3  147.61    2.42
  -1  -3  -4  364.11    3.19
   1  -3   4  429.14    4.34
   1  -3   7    8.38    1.08
  -1   3  -7    6.95    1.00
  -1   3  -8  235.41    4.17
   1  -3   8  230.33    4.17
   1  -3   9  326.03    5.16
  -1   3  -9  320.70    5.15
   1  -3  10  254.81    4.82
  -1   3 -10  259.04    4.82
   1  -3  11  204.22    4.57
  -1   3 -11  218.73    4.72
  -1   3 -12   95.21    3.30
   1  -3  12   98.25    3.34
  -1  -3 -12   87.52    3.05
  -1   3 -13 1100.74   11.16
   1  -3  13 1092.61   11.16
  -1  -3 -13 1076.10   10.55
   1  -3  14   94.05    3.54
  -1   3 -14   94.92    3.60
  -1  -3 -14   95.63    3.40
  -1   3 -15   99.40    3.81
  -1  -3 -15   99.46    3.64
   1  -3  15   99.45    3.87
  -1  -3 -16  929.16   10.83
   1  -3  16  911.71   11.41
  -1   3 -16  923.40   11.32
   1  -3  17    7.36    1.68
  -1  -3 -17    8.59    1.79
  -1   3 -17    7.12    1.69
  -1  -3 -18    8.57    1.92
  -1   3 -18    8.20    1.94
   1  -3  18    9.51    1.98
  -1   3 -19   23.64    2.42
   1  -3  19   25.22    2.43
  -1  -3 -19   23.28    2.28
   1  -3  20    1.21    1.49
  -1   3 -20    2.58    1.49
  -1  -3 -20   -1.67    1.50
  -1  -3 -21   84.07    4.06
  -1   3 -21   81.45    4.11
  -1   3 -22    4.37    1.86
  -1  -3 -22    2.72    1.69
  -1  -3 -23    2.32    1.78
  -1   3 -23    2.29    1.91
  -1   3 -24   48.36    3.67
  -1  -3 -24   47.41    3.55
  -1   3 -25  303.09    8.30
  -1  -3 -25  292.71    8.02
  -1  -3 -26   53.67    3.92
  -1   3 -26   56.73    4.08
  -1   3 -27  124.23    5.75
  -1  -3 -27  123.00    5.59
  -1   3 -28    4.57    2.64
  -1  -3 -28    2.67    2.22
  -1   3 -29  106.70    5.82
  -1  -3 -29  106.36    5.63
  -1  -3 -30   26.19    3.37
  -1   3 -30   28.83    3.66
  -1  -3 -31   52.48    4.24
  -1   3 -31   59.85    4.77
  -1   3 -32   42.97    4.43
  -1  -3 -32   41.26    4.29
  -1   3 -33   -0.33    2.51
  -1  -3 -33   -3.48    2.76
  -1  -3 -34   -0.04    2.70
  -1   3 -34   -2.56    2.80
  -1   3 -35   19.56    3.68
  -1  -3 -35   16.85    3.48
  -1  -3 -36   71.95    5.67
  -1   3 -36   67.45    5.63
  -1  -3 -37    0.35    2.91
  -1   3 -37    3.85    3.24
  -1  -3 -38   -2.19    2.96
  -1   3 -38   -0.74    3.26
  -1   3 -39   11.43    3.61
  -1  -3 -39    8.08    3.42
  -1   3 -40   10.60    3.89
  -1  -3 -40    2.86    3.16
  -1  -3 -41    9.21    3.73
  -1   3 -41   15.14    4.25
  -1  -3 -42    2.63    3.70
  -1   3 -42   -4.99    3.79
  -1  -3 -43    2.16    3.47
  -1   3 -43   -1.56    3.68
  -1  -3 -44   12.89    4.56
   1  -4 -43   -0.40    3.64
   1   4 -42   14.88    4.08
   1  -4 -42   24.27    4.86
   1   4 -41    2.34    3.48
   1  -4 -41   -3.68    3.60
   1  -4 -40    4.24    3.41
   1   4 -40    1.93    3.35
   1   4 -39   -4.80    3.52
   1  -4 -39    1.30    3.07
   1  -4 -38   28.37    4.56
   1   4 -38   33.70    4.68
   1   4 -37    5.73    3.27
   1  -4 -37    4.74    3.06
   1  -4 -36    6.75    3.02
   1   4 -36    9.18    3.22
   1  -4 -35   42.19    4.69
   1   4 -35   48.15    4.99
   1   4 -34   17.17    3.42
   1  -4 -34   18.11    3.54
   1  -4 -33   19.19    3.53
   1   4 -33   15.80    3.36
   1   4 -32    2.16    2.60
   1  -4 -32    3.24    2.58
   1   4 -31   28.57    3.74
   1  -4 -31   24.10    3.67
   1   4 -30  173.78    7.43
   1  -4 -30  175.35    7.44
   1   4 -29   39.07    4.00
   1  -4 -29   37.16    3.76
   1   4 -28  176.53    7.27
   1  -4 -28  180.16    7.24
   1  -4 -27   43.66    3.90
   1   4 -27   41.47    3.78
   1  -4 -26   10.32    2.52
   1   4 -26   13.14    2.72
   1  -4 -25   21.19    2.73
   1   4 -25   23.03    2.86
   1  -4 -24   14.82    2.61
   1   4 -24   12.64    2.48
   1   4 -23   96.03    4.71
   1  -4 -23   88.48    4.51
   1  -4 -22  326.83    8.21
   1   4 -22  327.03    8.30
   1   4 -21  137.89    5.56
   1  -4 -21  131.11    5.27
   1   4 -20  877.75   12.86
   1   4 -19  248.79    6.75
   1   4 -18    2.69    1.51
   1   4 -17    2.17    1.44
  -1  -4  16  205.41    5.75
   1   4 -16  206.40    5.70
  -1  -4  15  329.66    6.95
   1   4 -15  281.23    6.32
   1   4 -14  936.07   11.14
  -1  -4  14  930.31   11.17
   1   4 -13   31.01    2.36
  -1  -4  13   26.62    2.13
   1   4 -11  203.01    4.73
  -1  -4  11  141.01    3.97
  -1  -4  10  232.74    4.89
   1   4 -10  234.19    4.81
   1   4  -9  918.85    8.90
  -1  -4   9  914.58    9.01
  -1  -4   8 1141.17    9.59
   1  -4  -8 1153.76    9.52
   1   4  -8 1154.02    9.59
  -1  -4   7 2013.32   12.09
   1   4  -7 2020.33   11.96
   1  -4  -7 1972.07   11.92
   1   4  -6    7.77    1.02
   1  -4  -6    8.40    1.08
  -1  -4   6    4.96    1.01
   1  -4  -3    8.53    0.89
  -1  -4   3    6.46    0.79
  -1   4   3    6.50    0.81
   1   4  -3    5.94    0.74
  -1   4   2  340.22    3.90
   1  -4  -2  343.71    3.90
  -1  -4   1 1007.04    5.32
  -1   4   0    6.43    0.67
   1  -4   0    3.56    0.58
   1   4   0    3.94    0.44
  -1  -4   0    5.07    0.49
   1   4   1  289.80    2.48
   1  -4   1  268.73    3.27
  -1   4  -1  280.39    3.39
   1   4   2   37.89    0.98
  -1   4  -2   39.42    1.40
  -1  -4  -3  100.52    1.62
   1   4   3   93.98    1.65
   1  -4   3   93.27    2.15
  -1   4  -3   92.05    2.12
  -1   4  -4   14.16    1.12
   1  -4   4   16.50    1.18
  -1  -4  -4    9.42    0.77
   1   4   4    6.99    0.69
  -1   4  -5  599.24    5.80
  -1  -4  -5  593.32    4.68
   1  -4   5  613.03    5.85
  -1   4  -6    4.38    0.93
  -1  -4  -6    6.52    0.88
   1  -4   6    6.44    1.00
  -1   4  -7 1091.18    8.73
   1  -4   7 1130.64    8.86
  -1   4  -8  469.80    6.03
   1  -4   8  472.98    6.06
  -1   4 -10   85.43    2.99
   1  -4  10   82.19    2.95
   1  -4  11  513.00    7.21
  -1   4 -11  505.03    7.15
   1  -4  12  516.99    7.63
  -1   4 -12  496.41    7.41
   1  -4  13    9.27    1.49
  -1   4 -13    9.14    1.46
  -1   4 -14  229.68    5.48
   1  -4  14  229.12    5.48
  -1  -4 -15  119.17    3.96
   1  -4  15  120.33    4.24
  -1   4 -15  127.65    4.29
   1  -4  16   55.39    3.13
  -1  -4 -16   53.86    2.94
  -1   4 -16   52.51    3.12
  -1   4 -17    4.09    1.64
   1  -4  17    3.07    1.44
  -1  -4 -17    2.92    1.37
   1  -4  18 1756.71   17.06
  -1  -4 -18 1781.05   16.28
  -1   4 -18 1777.66   17.11
  -1   4 -19   53.98    3.39
  -1  -4 -19   47.69    3.03
   1  -4  19   51.88    3.29
  -1  -4 -20  148.49    5.31
   1  -4  20  138.13    5.44
  -1   4 -20  141.92    5.39
  -1   4 -21    0.11    1.50
  -1  -4 -21    1.81    1.57
   1  -4  21    1.85    1.76
   1  -4  22   13.43    2.26
  -1  -4 -22   15.85    2.28
  -1   4 -22   20.94    2.56
  -1   4 -23   28.94    2.94
  -1  -4 -23   32.88    2.96
  -1   4 -24    0.51    1.76
  -1  -4 -24    3.77    1.92
  -1  -4 -25    1.35    1.87
  -1   4 -25    3.77    2.14
  -1  -4 -26  205.07    6.90
  -1   4 -26  219.79    7.49
  -1   4 -27   23.49    3.10
  -1  -4 -27   21.40    2.95
  -1   4 -28   75.80    4.83
  -1  -4 -28   83.70    4.98
  -1   4 -29  104.13    5.72
  -1  -4 -29   99.24    5.43
  -1  -4 -30    9.47    2.52
  -1   4 -30   12.41    2.83
  -1  -4 -31   23.19    3.31
  -1   4 -31   22.43    3.36
  -1   4 -32   50.66    4.60
  -1  -4 -32   51.71    4.44
  -1   4 -33   -0.18    2.56
  -1  -4 -33   -1.31    2.68
  -1   4 -34  126.94    6.90
  -1  -4 -34  129.56    6.66
  -1   4 -35    0.81    2.94
  -1  -4 -35   -0.74    2.59
  -1   4 -36   10.18    3.41
  -1  -4 -36    6.67    3.09
  -1   4 -37    4.30    3.28
  -1  -4 -37    7.54    2.96
  -1   4 -38    5.10    2.90
  -1  -4 -38   11.30    3.45
  -1   4 -39    3.83    3.49
  -1  -4 -39   -0.56    2.95
  -1  -4 -40    3.81    3.34
  -1   4 -40    0.46    3.16
  -1   4 -41   -0.92    3.62
  -1  -4 -41    1.61    3.33
  -1   4 -42   38.79    5.24
  -1  -4 -42   33.25    4.97
  -1   4 -43    0.75    3.63
  -1  -4 -43    0.49    3.76
  -1  -4 -44   10.63    4.49
   1  -5 -43   11.45    4.26
   1  -5 -42   -0.50    3.57
   1   5 -42    1.78    3.56
   1  -5 -41    1.18    3.33
   1   5 -41   -4.16    3.63
   1  -5 -40   -3.93    3.50
   1   5 -40   -0.36    3.19
   1  -5 -39    7.09    3.65
   1   5 -39    4.09    3.12
   1  -5 -38   -2.75    3.07
   1   5 -38    2.37    3.36
   1   5 -37   11.40    3.70
   1  -5 -37   13.51    3.77
   1   5 -36    4.93    3.06
   1  -5 -36    3.10    3.11
   1   5 -35    3.08    3.00
   1  -5 -35    1.41    2.75
   1  -5 -34    8.92    2.91
   1   5 -34   15.03    3.65
   1   5 -33   12.20    3.36
   1  -5 -33   10.97    3.02
   1  -5 -32    6.56    2.53
   1   5 -32    4.82    2.84
   1  -5 -31  159.48    7.25
   1   5 -31  160.47    7.34
   1  -5 -30    4.17    2.55
   1   5 -30    7.41    2.68
   1   5 -29  310.57    9.57
   1  -5 -29  307.66    9.43
   1   5 -28   86.69    5.40
   1  -5 -28   76.29    5.12
   1   5 -27    1.65    2.18
   1  -5 -27    3.51    2.48
   1  -5 -26   10.53    2.62
   1   5 -26    6.78    2.40
   1   5 -25   12.20    2.53
   1  -5 -25   13.53    2.63
   1  -5 -24    7.61    2.17
   1   5 -24    7.32    2.27
   1   5 -23    8.03    2.22
   1  -5 -23    5.38    2.09
   1   5 -22   76.22    4.38
   1   5 -21 1072.84   14.79
   1   5 -20   15.50    2.60
  -1  -5  19 1845.98   18.37
   1   5 -19 1877.16   18.40
   1   5 -18   10.46    2.18
  -1  -5  18    5.85    1.70
  -1  -5  17   22.89    2.39
   1   5 -17   20.16    2.30
  -1  -5  16   40.88    2.86
   1   5 -16   41.08    2.84
  -1  -5  15    0.93    1.38
   1   5 -15    1.17    1.30
  -1  -5  14   74.10    3.41
   1   5 -14   74.02    3.44
   1   5 -13   67.32    3.14
  -1  -5  13   51.63    2.80
   1   5 -12  109.38    3.73
  -1  -5  12  104.75    3.71
   1  -5 -11 1903.43   14.07
  -1  -5  11 1845.07   14.33
   1   5 -11 1874.18   14.24
  -1  -5  10  629.40    7.97
   1   5 -10  630.26    7.95
   1   5  -9  866.83    8.97
   1  -5  -9  861.57    8.85
  -1  -5   8  395.26    5.84
   1   5  -8  379.32    5.77
   1  -5  -7  252.05    4.43
   1   5  -7  256.52    4.45
  -1  -5   7  268.25    4.56
  -1   5   5  523.38    5.84
   1   5  -5  477.86    5.34
   1  -5  -5  523.45    5.76
  -1  -5   5  483.00    5.45
   1   5  -4  544.28    5.37
   1  -5  -4  566.61    5.72
  -1  -5   4  548.08    5.50
  -1   5   4  555.58    5.72
  -1  -5   3  411.06    4.43
   1  -5  -3  438.37    4.89
   1   5  -3  409.07    4.40
  -1   5   3  442.12    4.97
  -1   5   1   15.06    1.11
  -1  -5   1   12.82    0.91
   1  -5  -1   13.94    1.04
   1   5  -1   13.63    0.89
   1   5   0    8.73    0.71
  -1   5   0    6.36    0.79
   1  -5   0    8.69    0.89
  -1  -5   0    9.92    0.74
  -1  -5  -1  375.53    3.31
   1   5   1  363.54    3.28
   1  -5   1  371.35    4.27
  -1   5  -1  377.29    4.34
   1  -5   3   24.80    1.37
  -1  -5  -3   27.07    1.05
   1   5   3   26.80    1.07
  -1   5  -3   25.02    1.38
  -1   5  -7  215.58    4.08
   1  -5   7  218.48    4.20
   1  -5   8  678.71    7.50
  -1  -5  -8  613.59    6.26
  -1   5 -10   17.36    1.60
   1  -5  10   20.84    1.68
   1  -5  11   66.09    2.89
  -1   5 -11   66.86    2.92
  -1   5 -12  145.77    4.12
   1  -5  12  152.70    4.29
   1  -5  13   48.65    2.64
  -1   5 -13   49.44    2.61
   1  -5  14    0.76    1.22
  -1   5 -14    1.39    1.16
   1  -5  15   16.43    1.94
  -1   5 -15   15.69    1.90
  -1   5 -16   39.27    2.74
   1  -5  16   40.75    2.86
  -1   5 -17  141.95    4.88
  -1  -5 -17  133.84    4.38
   1  -5  17  131.36    4.77
  -1  -5 -18  294.16    6.62
  -1   5 -18  311.57    7.18
   1  -5  18  309.34    7.32
  -1   5 -19   28.69    2.69
  -1  -5 -19   23.66    2.31
   1  -5  19   27.24    2.66
  -1  -5 -20   18.67    2.64
   1  -5  20   18.19    2.73
  -1   5 -20   18.28    2.76
  -1   5 -21   31.08    2.86
   1  -5  21   33.90    2.92
  -1  -5 -21   28.65    2.56
  -1  -5 -22   90.08    4.33
  -1   5 -22   88.76    4.51
   1  -5  22   89.06    4.51
  -1  -5 -23   -0.66    1.56
   1  -5  23   -0.89    1.72
  -1   5 -23    1.16    1.63
  -1   5 -24   29.10    3.20
   1  -5  24   30.88    3.18
  -1  -5 -24   29.14    2.95
  -1   5 -25  507.47   10.85
  -1  -5 -25  501.04   10.33
  -1  -5 -26   17.53    2.74
  -1   5 -26   16.60    2.86
  -1  -5 -27  255.40    7.82
  -1   5 -27  259.75    8.20
  -1   5 -28   41.22    4.04
  -1  -5 -28   30.53    3.38
  -1   5 -29   -0.77    2.22
  -1  -5 -29    2.66    2.25
  -1  -5 -30   26.42    3.29
  -1   5 -30   23.59    3.44
  -1   5 -31   45.33    4.28
  -1  -5 -31   44.98    4.35
  -1  -5 -32   40.17    4.27
  -1   5 -32   43.07    4.40
  -1   5 -33   63.45    5.17
  -1  -5 -33   65.61    4.99
  -1  -5 -34   29.47    3.98
  -1   5 -34   30.62    4.07
  -1  -5 -35   52.58    4.74
  -1   5 -35   56.18    5.00
  -1  -5 -36    3.35    2.85
  -1   5 -36    5.53    2.91
  -1   5 -37   10.45    3.25
  -1  -5 -37    8.06    3.08
  -1  -5 -38    0.16    2.94
  -1   5 -38    1.18    2.84
  -1   5 -39    3.00    3.44
  -1  -5 -39    2.29    3.23
  -1  -5 -40   -1.24    3.14
  -1   5 -40   -0.31    3.13
  -1  -5 -41   -1.10    3.42
  -1   5 -41   -0.83    3.28
  -1   5 -42    2.07    3.49
  -1  -5 -42    8.75    3.96
  -1  -5 -43   36.04    5.28
  -1  -5 -44   -0.81    3.80
   1  -6 -43   -3.79    3.79
   1  -6 -42   22.14    4.77
   1   6 -42   25.20    4.99
   1  -6 -41    6.41    3.97
   1   6 -41    6.37    3.58
   1   6 -40    4.41    3.50
   1  -6 -40    1.46    3.27
   1   6 -39    0.46    3.15
   1  -6 -39    2.76    3.35
   1   6 -38   30.65    4.56
   1  -6 -38   29.58    4.54
   1   6 -37    3.96    3.24
   1  -6 -37    5.27    3.46
   1  -6 -36    3.18    2.95
   1   6 -36    6.53    3.11
   1  -6 -35    3.53    3.09
   1   6 -35    1.06    2.75
   1   6 -34   25.04    4.02
   1  -6 -34   24.11    3.80
   1   6 -33   18.95    3.39
   1  -6 -33   18.41    3.61
   1   6 -32   16.38    3.47
   1  -6 -32   13.97    3.15
   1  -6 -31    1.05    2.40
   1   6 -31    4.02    2.85
   1  -6 -30  166.41    7.36
   1   6 -30  181.16    7.65
   1  -6 -29   -1.74    2.42
   1   6 -29    1.74    2.59
   1  -6 -28   60.94    4.52
   1   6 -28   64.77    4.74
   1  -6 -27    4.42    2.34
   1   6 -27    2.52    2.15
   1   6 -26   -1.23    2.13
   1  -6 -26    0.48    1.99
   1  -6 -25    2.66    1.99
   1   6 -25   -0.70    1.96
   1   6 -24   16.32    2.63
   1  -6 -24   18.19    2.56
   1   6 -23   39.10    3.48
   1   6 -22  322.41    8.39
  -1  -6  21   51.07    3.69
   1   6 -21   55.15    3.89
  -1  -6  20  454.55    9.54
   1   6 -20  417.52    9.00
   1   6 -19   94.56    4.45
  -1  -6  19   96.04    4.56
  -1  -6  18   62.58    3.63
   1   6 -18   59.17    3.56
  -1  -6  17  112.92    4.56
   1   6 -17  107.35    4.41
  -1  -6  16   26.04    2.39
   1   6 -16   28.72    2.48
   1   6 -15    7.65    1.74
  -1  -6  15    7.00    1.75
  -1  -6  14  309.03    6.71
   1   6 -14  314.40    6.71
   1   6 -13  145.74    4.50
  -1  -6  13  147.49    4.52
   1  -6 -13  158.40    4.58
   1   6 -12  906.50   10.58
  -1  -6  12  895.51   10.52
   1  -6 -12  912.75   10.32
   1   6 -11  370.02    6.52
  -1  -6  11  380.63    6.61
  -1  -6  10    4.84    1.31
   1   6 -10    5.39    1.26
   1   6  -9    9.27    1.34
  -1  -6   9    9.87    1.38
  -1  -6   8  161.80    3.88
   1   6  -8  162.13    3.84
   1  -6  -7   67.97    2.52
   1   6  -7   62.18    2.35
  -1  -6   7   60.33    2.38
  -1   6   6   27.12    1.64
  -1  -6   6   39.81    1.85
   1   6  -6   36.88    1.79
   1  -6  -6   26.97    1.59
   1  -6  -5    6.19    1.05
  -1  -6   5    6.44    1.04
   1   6  -5    5.71    0.95
  -1   6   5    5.88    1.02
   1  -6  -4  339.77    4.65
  -1  -6   4  329.37    4.45
   1   6  -4  329.56    4.43
  -1   6   4  321.36    4.65
   1   6  -3  594.83    5.57
  -1   6   3  582.44    6.00
   1  -6  -3  580.45    5.88
  -1  -6   3  602.61    5.64
  -1  -6   2  112.02    2.40
   1  -6  -2  125.50    2.76
  -1   6   2  120.78    2.80
   1   6  -2  112.13    2.40
  -1   6   0  148.78    3.05
  -1  -6   0  154.89    2.50
   1  -6   0  156.47    3.02
   1   6   0  151.01    2.50
  -1  -6  -1  437.70    3.99
   1  -6   1  432.77    4.96
  -1   6  -1  449.49    5.06
   1   6   1  440.63    4.07
   1   6   2    3.31    0.74
  -1  -6  -2    3.03    0.67
   1  -6   2    5.10    1.02
  -1   6  -2    3.17    0.86
  -1   6  -4    1.11    0.83
   1  -6   4    2.18    0.91
  -1  -6  -4    2.28    0.72
   1   6   4    0.00    0.60
   1   6   5   18.81    1.19
  -1  -6  -5   20.92    1.23
  -1   6  -5   26.31    1.63
   1  -6   5   28.20    1.65
  -1   6  -6    4.29    0.93
   1  -6   6    2.55    0.87
   1   6   6    1.87    0.73
  -1  -6  -6    2.27    0.71
   1  -6   7    6.57    1.10
  -1   6  -7    7.46    1.13
   1  -6   8 1732.85   12.46
  -1   6  -8 1728.28   12.34
  -1   6  -9   58.86    2.50
   1  -6   9   60.47    2.57
  -1  -6 -10   11.21    1.32
  -1   6 -10   10.94    1.57
   1  -6  10   15.54    1.81
  -1   6 -11   76.34    3.10
   1  -6  11   81.43    3.23
  -1   6 -12  721.79    9.23
   1  -6  12  711.12    9.24
   1  -6  13  235.24    5.60
  -1   6 -13  235.70    5.52
  -1   6 -14  241.87    5.77
   1  -6  14  242.19    5.89
   1  -6  15    6.12    1.57
  -1   6 -15    4.96    1.50
  -1   6 -16 1395.86   14.48
   1  -6  16 1388.56   14.74
  -1   6 -17  315.94    7.20
   1  -6  17  312.55    7.24
  -1   6 -18 1099.57   13.65
   1  -6  18 1076.71   13.81
  -1  -6 -19   14.61    2.10
  -1   6 -19   15.66    2.24
   1  -6  19   17.58    2.22
   1  -6  20   30.82    2.82
  -1  -6 -20   27.89    2.49
  -1   6 -20   31.34    2.80
  -1  -6 -21   20.94    2.47
  -1   6 -21   23.01    2.66
   1  -6  21   22.31    2.62
  -1   6 -22   77.13    4.26
  -1  -6 -22   72.40    4.07
   1  -6  22   76.81    4.37
  -1  -6 -23   96.53    4.65
   1  -6  23   99.07    4.91
  -1   6 -23   96.78    4.85
   1  -6  24   95.33    5.02
  -1   6 -24  101.66    5.04
  -1  -6 -24  100.03    4.68
   1  -6  25    9.64    2.50
  -1  -6 -25   14.41    2.50
  -1   6 -25   16.17    2.82
  -1   6 -26  310.87    8.78
   1  -6  26  291.97    8.71
  -1  -6 -26  293.46    8.22
  -1   6 -27   53.01    4.17
  -1  -6 -27   55.73    4.17
  -1  -6 -28   34.78    3.59
  -1   6 -28   32.26    3.72
  -1  -6 -29    6.50    2.35
  -1   6 -29   10.86    2.83
  -1  -6 -30    5.06    2.63
  -1   6 -30    3.22    2.36
  -1   6 -31    7.32    2.71
  -1  -6 -31    8.54    2.42
  -1   6 -32  153.13    7.35
  -1  -6 -32  157.68    7.22
  -1   6 -33    1.48    2.60
  -1  -6 -33    1.58    2.62
  -1   6 -34   78.33    5.52
  -1  -6 -34   80.48    5.55
  -1   6 -35   -2.47    2.91
  -1  -6 -35    0.65    2.68
  -1  -6 -36    6.90    2.80
  -1   6 -36   14.54    3.34
  -1  -6 -37    9.18    3.34
  -1   6 -37   12.23    3.67
  -1  -6 -38    6.95    3.42
  -1   6 -38    4.91    3.09
  -1  -6 -39    1.78    2.97
  -1   6 -39    0.92    3.18
  -1   6 -40   -2.95    3.29
  -1  -6 -40   -0.57    3.21
  -1  -6 -41    8.53    4.14
  -1   6 -41    6.92    3.59
  -1   6 -42   18.97    4.30
  -1  -6 -42   26.15    4.61
  -1  -6 -43   -1.81    3.71
   1  -7 -43   11.27    4.34
   1  -7 -42    6.62    3.92
   1  -7 -41   25.75    4.79
   1   7 -41   31.72    5.18
   1  -7 -40    9.80    3.74
   1   7 -40    6.38    3.46
   1  -7 -39    9.82    3.67
   1   7 -39   10.69    3.74
   1   7 -38   -1.65    3.26
   1  -7 -38    4.08    3.02
   1  -7 -37   27.86    4.33
   1   7 -37   19.76    3.80
   1   7 -36   20.61    3.85
   1  -7 -36   24.46    3.86
   1   7 -35   56.92    5.28
   1  -7 -35   65.94    5.57
   1   7 -34   20.42    3.84
   1  -7 -34   21.78    3.73
   1   7 -33   20.79    3.36
   1  -7 -33   13.62    2.99
   1  -7 -32   28.56    3.86
   1   7 -32   22.31    3.65
   1  -7 -31   20.42    3.40
   1   7 -31   16.17    3.30
   1  -7 -30    0.92    2.46
   1   7 -30    1.31    2.74
   1   7 -29   86.80    5.46
   1  -7 -29   77.70    5.23
   1   7 -28   18.87    3.42
   1  -7 -28   16.12    3.20
   1  -7 -27    6.21    2.47
   1   7 -27    5.41    2.55
   1   7 -26    8.19    2.64
   1  -7 -26   10.43    2.47
   1   7 -25    5.39    2.07
   1   7 -24   14.56    2.64
   1   7 -23   33.75    3.25
  -1  -7  23   42.32    3.48
   1   7 -22   78.47    4.45
  -1  -7  22   97.68    4.95
  -1  -7  21    1.70    1.80
   1   7 -21   -0.32    1.73
   1   7 -20   12.58    2.19
  -1  -7  20   12.27    2.30
   1   7 -19    3.41    1.88
  -1  -7  19    0.03    1.63
   1  -7 -18  338.54    7.73
  -1  -7  18  318.51    7.69
   1  -7 -17   43.37    3.05
   1   7 -17   37.03    2.93
  -1  -7  17   34.04    2.99
  -1  -7  16  196.79    5.82
   1   7 -16  201.80    5.73
  -1  -7  15   83.94    3.83
   1   7 -15   82.86    3.67
   1  -7 -14   19.19    2.02
   1   7 -14   14.90    1.91
  -1  -7  14   15.38    1.98
  -1  -7  13    2.98    1.43
   1   7 -13    2.57    1.31
   1  -7 -13    1.75    1.28
   1   7 -12   61.94    3.03
  -1  -7  12   60.63    3.06
   1  -7 -12   52.24    2.74
  -1  -7  11   37.40    2.32
   1   7 -11   42.03    2.40
   1  -7 -11   42.43    2.36
  -1  -7  10  253.56    5.36
   1   7 -10  255.80    5.29
   1  -7 -10  258.47    5.27
   1   7  -9  175.22    4.23
  -1  -7   9  176.27    4.31
   1  -7  -9  184.00    4.32
   1  -7  -8  445.30    6.39
   1   7  -8  447.96    6.42
  -1  -7   8  461.98    6.65
  -1   7   8  438.30    6.33
   1   7  -7  233.86    4.55
  -1   7   7  238.61    4.68
   1  -7  -7  241.29    4.61
  -1  -7   7  253.47    4.72
   1  -7  -5  213.88    4.02
  -1  -7   5  193.92    3.85
  -1   7   5  209.89    4.12
   1   7  -5  191.44    3.76
  -1  -7   4 2577.75   12.84
   1   7  -3  518.34    5.54
  -1   7   3  551.43    6.16
  -1  -7   3  513.64    5.55
   1  -7  -3  554.44    6.12
  -1   7   2  422.36    5.31
   1   7  -2  446.93    4.90
   1  -7  -2  431.04    5.29
  -1  -7   2  457.98    4.96
   1   7  -1   23.71    1.25
  -1  -7   1   21.60    1.21
  -1   7   1   25.04    1.46
   1  -7  -1   21.13    1.36
   1  -7   0   24.04    1.40
  -1   7   0   22.93    1.44
  -1  -7   0   22.88    1.18
   1   7   0   21.41    1.13
   1   7   2  791.84    5.98
  -1   7  -2  793.19    7.22
  -1  -7  -2  795.47    5.87
   1  -7   2  814.17    7.22
  -1   7  -3  690.98    6.98
   1  -7   3  701.65    6.96
  -1  -7  -3  712.54    5.67
   1   7   3  717.43    5.87
  -1   7  -4  263.27    4.41
   1  -7   4  266.76    4.44
   1   7   4  242.84    3.50
  -1  -7  -4  253.62    3.48
  -1  -7  -5 2052.20   10.24
   1  -7   5 2091.89   12.59
   1   7   7   25.55    1.73
  -1   7  -7   31.26    2.08
  -1  -7  -7   29.58    1.68
   1  -7   7   33.87    2.23
   1  -7   8 2099.41   13.97
  -1  -7 -10  761.06    8.00
  -1   7 -10  793.33    9.18
  -1   7 -11  194.71    4.90
   1  -7  11  198.21    4.97
  -1  -7 -12  477.75    6.90
   1  -7  12  471.30    7.67
   1  -7  13   51.64    2.86
  -1   7 -13   46.23    2.71
   1  -7  14  120.83    4.34
  -1   7 -14  118.40    4.24
  -1   7 -15  373.19    7.50
   1  -7  15  373.41    7.62
   1  -7  16   30.41    2.59
  -1   7 -16   29.26    2.40
  -1   7 -17  365.11    7.77
   1  -7  17  375.97    8.08
  -1   7 -18   52.13    3.41
   1  -7  18   51.16    3.45
   1  -7  19  110.67    4.71
  -1   7 -19  114.04    4.79
  -1   7 -20   42.43    3.24
   1  -7  20   47.57    3.48
  -1   7 -21   19.55    2.48
  -1  -7 -21   20.28    2.33
   1  -7  21   24.09    2.74
  -1   7 -22   18.99    2.51
   1  -7  22   23.49    2.81
  -1  -7 -22   16.34    2.37
  -1  -7 -23   79.20    4.32
  -1   7 -23   91.07    4.80
   1  -7  23   84.98    4.82
  -1   7 -24    9.00    2.28
   1  -7  24   11.83    2.57
  -1  -7 -24   10.94    2.15
  -1   7 -25  569.22   11.71
  -1  -7 -25  559.77   11.00
   1  -7  25  546.88   11.84
  -1   7 -26   13.09    2.66
   1  -7  26    9.86    2.49
  -1  -7 -26   10.59    2.55
  -1  -7 -27  203.92    7.20
   1  -7  27  198.06    7.52
  -1   7 -27  199.26    7.38
  -1   7 -28   15.26    2.84
  -1  -7 -28   17.16    2.93
  -1   7 -29   42.36    3.91
  -1  -7 -29   43.05    3.76
  -1   7 -30   10.59    2.95
  -1  -7 -30    9.63    2.80
  -1  -7 -31   21.01    3.21
  -1   7 -31   16.08    3.11
  -1  -7 -32   91.20    5.84
  -1   7 -32   91.41    5.88
  -1   7 -33  109.15    6.35
  -1  -7 -33  107.69    6.14
  -1   7 -34   42.50    4.26
  -1  -7 -34   49.59    4.63
  -1   7 -35   80.93    5.85
  -1  -7 -35   78.77    5.75
  -1   7 -36    0.05    2.87
  -1  -7 -36   -5.39    3.46
  -1  -7 -37   17.54    3.56
  -1   7 -37   19.02    3.73
  -1  -7 -38    1.99    2.92
  -1   7 -38   -1.95    3.04
  -1   7 -39   43.69    5.17
  -1  -7 -39   46.99    5.18
  -1   7 -40    2.89    3.58
  -1  -7 -40    2.61    3.38
  -1   7 -41   13.40    4.16
  -1  -7 -41    4.54    3.52
  -1  -7 -42    5.07    3.61
  -1   7 -42    7.35    3.73
  -1  -7 -43    9.01    4.24
   1  -8 -43   16.14    4.54
   1  -8 -42   36.36    5.29
   1  -8 -41   21.22    4.70
   1   8 -41   22.27    4.80
   1   8 -40    8.42    3.80
   1  -8 -40   -0.11    3.29
   1  -8 -39   10.81    3.66
   1   8 -39   10.95    3.78
   1  -8 -39    5.19    3.37
   1  -8 -38   43.30    5.11
   1  -8 -38   31.81    4.73
   1   8 -38   28.39    4.46
   1   8 -37    7.50    3.34
   1  -8 -37    5.82    3.18
   1  -8 -37    5.95    3.46
   1  -8 -36    8.09    3.19
   1   8 -36    6.52    3.36
   1  -8 -36   12.26    3.53
   1  -8 -35   15.44    3.56
   1  -8 -35   17.22    3.69
   1   8 -35   18.36    3.95
   1  -8 -34  118.21    6.73
   1   8 -34  129.76    7.25
   1  -8 -34  117.01    6.78
   1  -8 -33   12.27    3.21
   1   8 -33    4.57    2.88
   1  -8 -33    8.41    3.12
   1   8 -32   23.48    3.71
   1  -8 -32   26.45    3.92
   1  -8 -32   20.65    3.61
   1   8 -31    3.69    2.57
   1  -8 -31    6.46    2.78
   1   8 -30    4.03    2.59
   1  -8 -30    2.93    2.63
   1  -8 -29   22.35    3.45
   1   8 -29   22.70    3.52
   1   8 -28    9.05    2.98
   1  -8 -28    8.99    3.00
   1   8 -27    4.00    2.56
   1  -8 -27    2.22    2.17
   1   8 -26   27.33    3.42
   1  -8 -26   26.66    3.36
   1   8 -25   81.35    4.90
   1  -8 -25   95.19    5.06
   1  -8 -24  102.65    5.06
  -1  -8  24   96.58    5.20
   1   8 -23  104.81    5.09
   1  -8 -23   91.55    4.72
  -1  -8  23  102.90    5.18
   1   8 -22  173.59    6.45
   1  -8 -22  169.24    6.04
  -1  -8  22  169.43    6.42
  -1  -8  21   47.92    3.61
   1   8 -21   51.85    3.66
   1  -8 -21   49.75    3.46
   1  -8 -20   15.36    2.15
  -1  -8  20   17.58    2.55
   1   8 -20   18.55    2.53
   1   8 -19  168.82    5.87
  -1  -8  19  177.42    6.08
  -1  -8  18  177.16    5.98
   1   8 -18  177.82    5.88
   1  -8 -17  108.34    4.38
   1   8 -17  114.31    4.63
  -1  -8  17  112.89    4.72
   1  -8 -16  366.23    7.62
  -1  -8  16  384.67    8.17
   1   8 -16  395.04    8.07
   1   8 -15   50.69    3.12
  -1  -8  15   49.93    3.23
   1  -8 -15   44.93    2.91
  -1  -8  14  119.08    4.46
   1   8 -14  112.18    4.23
   1  -8 -14  115.09    4.22
   1   8 -13 1519.57   14.33
  -1  -8  13 1547.84   14.81
   1  -8 -13 1509.75   14.00
   1   8 -12  166.98    4.71
  -1  -8  12  158.89    4.79
   1  -8 -12  173.66    4.73
   1   8 -11  295.33    5.95
   1  -8 -11  315.25    6.16
  -1  -8  11  297.73    6.16
   1   8 -10  126.56    3.93
  -1  -8  10  134.27    4.07
   1  -8  -9  123.75    3.69
  -1   8   9  118.19    3.65
   1  -8  -8   14.02    1.56
   1   8  -8   12.75    1.59
  -1  -8   8   12.20    1.61
  -1   8   8   18.03    1.76
   1  -8  -7  591.48    7.35
  -1  -8   7  616.94    7.63
  -1   8   7  586.19    7.45
   1   8  -7  582.51    7.24
  -1  -8   6  128.55    3.45
   1  -8  -6  115.51    3.23
   1   8  -6  123.20    3.28
   1  -8  -5   85.88    2.78
  -1   8   5   86.43    2.83
   1   8  -5   83.36    2.64
  -1  -8   5   87.38    2.75
   1   8  -4  482.41    5.86
   1  -8  -4  484.07    6.13
  -1  -8   4  481.28    5.89
  -1   8   4  473.66    6.14
  -1   8   3  367.90    5.34
   1   8  -3  380.27    5.03
  -1  -8   3  388.97    5.09
   1  -8  -3  388.87    5.40
  -1   8   2  644.07    6.97
   1   8  -2  658.51    6.35
   1  -8  -2  660.28    6.95
  -1  -8   2  663.95    6.39
   1  -8  -1  833.17    7.69
  -1   8   1  803.80    7.68
  -1  -8   1  808.34    6.78
   1   8  -1  823.78    6.83
   1  -8   0  695.84    7.00
  -1  -8   0  693.93    6.14
  -1   8   0  696.15    7.14
   1   8   0  696.52    6.21
   1  -8   2   19.33    1.54
  -1  -8  -2   15.56    1.21
  -1   8  -2   17.12    1.53
   1   8   2   15.52    1.29
  -1   8  -4  366.76    5.54
  -1  -8  -4  382.55    4.62
   1  -8   4  363.90    5.46
   1   8   6   23.43    1.50
  -1  -8  -6   20.92    1.38
   1  -8   6   10.88    1.38
  -1   8  -6   11.87    1.34
   1  -8   7  226.37    4.72
  -1   8  -7  217.97    4.69
   1   8   7  239.35    4.18
  -1  -8  -7  226.72    4.00
   1  -8   8  160.58    4.09
   1   8   8  159.45    3.59
  -1   8  -8  153.54    4.05
  -1  -8  -8  166.09    3.55
   1  -8   9  144.22    4.07
  -1   8  -9  148.00    4.03
  -1   8 -10  100.67    3.50
  -1  -8 -10  101.58    3.13
   1  -8  10   89.24    3.33
  -1   8 -11   89.36    3.42
   1  -8  11   82.72    3.38
  -1  -8 -12  351.46    6.00
  -1   8 -12  338.44    6.59
   1  -8  12  338.04    6.78
  -1  -8 -13  595.01    8.04
   1  -8  13  589.10    9.09
  -1   8 -13  582.86    8.89
  -1  -8 -14   76.01    3.15
  -1   8 -14   79.79    3.51
  -1  -8 -15 1181.74   12.10
  -1   8 -15 1148.93   13.20
   1  -8  16  744.89   11.14
  -1   8 -16  744.29   11.03
  -1  -8 -17  258.61    6.09
  -1   8 -17  269.93    6.92
   1  -8  17  282.47    7.17
   1  -8  18  421.70    8.96
  -1   8 -18  417.48    8.71
  -1   8 -19    7.84    1.96
   1  -8  19    5.48    1.77
  -1   8 -20   16.17    2.37
   1  -8  20   13.41    2.27
   1  -8  21   12.50    2.28
  -1   8 -21    8.77    2.02
  -1   8 -22   50.46    3.68
   1  -8  22   52.71    3.84
   1  -8  23   52.83    3.99
  -1  -8 -23   41.82    3.29
  -1   8 -23   45.89    3.57
  -1   8 -24    2.77    2.05
   1  -8  24    2.42    2.05
  -1  -8 -24    4.49    2.16
  -1   8 -25   25.27    3.19
  -1  -8 -25   25.37    3.00
   1  -8  25   24.10    3.39
  -1   8 -26   37.75    3.59
   1  -8  26   44.99    4.03
  -1  -8 -26   34.20    3.31
  -1   8 -27   26.65    3.30
  -1  -8 -27   23.33    3.12
   1  -8  27   18.86    3.28
  -1  -8 -28    0.33    2.10
   1  -8  28    0.46    2.43
  -1   8 -28    2.97    2.36
  -1   8 -29    7.03    2.53
  -1  -8 -29    8.77    2.51
  -1  -8 -30   38.23    3.99
  -1   8 -30   37.47    4.05
  -1   8 -31    3.76    2.50
  -1  -8 -31    3.01    2.60
  -1  -8 -32   32.52    3.89
  -1   8 -32   32.86    4.10
  -1  -8 -33   28.91    3.82
  -1   8 -33   30.84    4.10
  -1   8 -34   35.08    4.27
  -1  -8 -34   27.50    3.81
  -1  -8 -35   41.67    4.44
  -1   8 -35   40.11    4.65
  -1   8 -36    0.06    2.90
  -1  -8 -36    3.19    3.05
  -1   8 -37   -1.83    3.23
  -1  -8 -37   -1.22    2.90
  -1  -8 -38   25.00    4.18
  -1   8 -38   26.98    4.45
  -1  -8 -39    0.14    3.12
  -1   8 -39    4.19    3.33
  -1   8 -40    2.60    3.70
  -1  -8 -40   -2.38    3.25
  -1   8 -41    2.97    3.39
  -1  -8 -41    3.53    3.57
  -1  -8 -42    6.29    3.75
  -1  -8 -43   13.52    4.42
  -1  -8 -44    6.73    4.29
   1  -9 -43   10.62    4.68
   1  -9 -42    7.65    4.27
   1  -9 -41    5.72    3.57
   1   9 -41    5.09    3.69
   1   9 -40    6.32    4.04
   1  -9 -40   -0.78    3.44
   1  -9 -39    5.63    3.45
   1   9 -39    1.11    3.36
   1  -9 -38    7.41    3.37
   1  -9 -38    6.31    3.31
   1   9 -38   14.11    4.10
   1  -9 -37   -1.41    3.16
   1  -9 -37   -0.89    3.00
   1   9 -37    1.39    2.96
   1  -9 -36   13.66    3.67
   1  -9 -36   16.80    3.84
   1   9 -36   17.13    3.92
   1  -9 -35   45.08    4.78
   1   9 -35   38.69    4.86
   1  -9 -35   48.38    4.96
   1   9 -34   14.67    3.71
   1  -9 -34    9.97    3.16
   1  -9 -34    9.97    3.15
   1  -9 -33   79.66    5.69
   1   9 -33   84.30    5.95
   1  -9 -33   92.04    5.95
   1  -9 -32   80.85    5.61
   1  -9 -32   83.79    5.63
   1   9 -32   76.30    5.49
   1  -9 -31   17.46    3.32
   1   9 -31   18.41    3.47
   1  -9 -31   22.29    3.75
   1   9 -30   66.51    5.11
   1  -9 -30   82.39    5.37
   1  -9 -30   69.43    4.91
   1   9 -29   21.54    3.46
   1  -9 -29   26.29    3.45
   1  -9 -29   25.56    3.36
   1  -9 -28   83.93    5.13
   1   9 -28   87.75    5.55
   1  -9 -28   86.72    5.26
   1   9 -27  283.65    9.16
   1  -9 -27  276.70    8.72
  -1  -9  26  100.89    5.65
   1  -9 -26  108.00    5.50
   1  -9 -25  555.26   11.57
   1   9 -25  536.62   11.71
  -1  -9  25  562.56   12.30
  -1  -9  24   44.61    3.90
   1  -9 -24   48.62    3.79
   1   9 -24   42.84    3.72
  -1  -9  23  134.64    6.01
   1  -9 -23  145.70    5.80
   1   9 -23  148.17    6.08
   1   9 -22   47.37    3.61
  -1  -9  22   39.63    3.52
   1  -9 -22   44.62    3.44
   1   9 -21    0.28    1.71
  -1  -9  21   -0.96    1.72
   1  -9 -21    0.70    1.60
  -1  -9  20   86.87    4.60
   1   9 -20   89.49    4.51
  -1  -9  19   46.58    3.49
   1  -9 -19   38.77    3.07
   1   9 -19   49.47    3.52
  -1  -9  18  142.47    5.41
   1   9 -18  142.14    5.36
  -1  -9  17  846.70   12.36
   1  -9 -17  860.07   11.94
   1   9 -17  840.81   12.18
  -1  -9  16  121.82    4.70
   1   9 -16  122.87    4.70
   1  -9 -16  122.63    4.55
   1  -9 -15  926.26   11.86
   1   9 -15  922.27   12.03
  -1  -9  15  927.68   12.38
   1   9 -14  429.61    7.96
   1  -9 -14  442.28    7.96
  -1  -9  14  435.76    8.32
  -1  -9  13  116.86    4.34
   1   9 -13  114.08    4.12
   1   9 -12   33.14    2.38
   1  -9 -12   35.62    2.43
  -1  -9  12   34.62    2.61
   1  -9 -11   63.46    2.95
   1   9 -11   69.42    3.09
  -1  -9  11   73.12    3.20
  -1   9  10   52.10    2.68
  -1  -9  10   69.77    3.13
   1  -9 -10   55.75    2.69
   1   9 -10   64.98    2.92
  -1   9   9  706.65    8.90
  -1  -9   9  725.82    9.06
   1   9  -9  727.39    9.00
   1  -9  -9  710.21    8.68
   1   9  -8   53.15    2.54
  -1  -9   8   61.47    2.80
  -1   9   8   36.70    2.23
   1  -9  -8   40.95    2.30
   1  -9  -7   72.01    2.78
  -1  -9   7   68.29    2.80
  -1   9   7   69.13    2.83
   1   9  -7   66.68    2.70
  -1  -9   6 2694.61   15.63
   1  -9  -6 2622.40   15.47
  -1   9   5  669.40    7.82
  -1  -9   5  649.20    7.42
   1  -9  -5  677.61    7.73
   1   9  -5  664.13    7.46
   1   9  -4  311.78    4.96
  -1  -9   4  322.95    5.08
  -1   9   4  319.78    5.32
   1  -9  -4  317.10    5.19
   1   9  -3  121.42    3.08
  -1   9   3  135.42    3.52
  -1  -9   3  117.39    3.04
   1  -9  -3  129.22    3.35
  -1  -9   2  121.48    3.00
   1  -9  -2  129.48    3.33
  -1   9   2  128.91    3.39
   1   9  -2  123.50    2.99
   1   9  -1    2.26    0.73
   1  -9  -1    2.81    0.94
  -1  -9   1    4.01    0.93
  -1   9   1    2.49    0.88
  -1  -9   0  112.19    2.72
  -1   9   0  112.12    3.12
   1  -9   0  104.19    2.92
   1   9   0  110.28    2.70
   1  -9   1 1178.57    9.68
  -1   9  -1 1170.08    9.86
  -1  -9  -1 1171.45    8.40
   1   9   1 1180.59    8.63
   1   9   2   97.09    2.57
   1  -9   2  112.40    3.12
  -1   9  -2  106.12    3.05
  -1  -9  -2  105.36    2.55
   1   9   3   83.38    2.45
  -1  -9  -3   78.04    2.29
  -1   9  -3   73.12    2.66
   1  -9   3   73.33    2.70
   1   9   4   12.38    1.20
  -1   9  -4   16.07    1.48
  -1  -9  -4   15.19    1.24
  -1  -9  -5 1603.06   10.10
   1   9   5 1619.27   10.48
   1  -9   5 1558.17   11.98
  -1   9  -5 1579.61   12.01
   1  -9   6  935.52    9.48
  -1  -9  -6  937.64    7.93
  -1   9  -6  938.50    9.51
   1   9   6  906.76    8.02
  -1   9  -7  228.71    4.90
   1   9   7  216.33    4.10
  -1  -9  -7  213.04    4.02
   1  -9   7  229.54    4.93
   1  -9   8  496.61    7.36
  -1   9  -8  488.09    7.27
   1   9   8  468.68    6.12
  -1  -9  -8  490.39    6.21
  -1  -9  -9  671.38    7.49
  -1   9  -9  690.46    8.85
  -1   9 -10  250.02    5.53
  -1  -9 -10  253.57    4.81
   1  -9  10  252.67    5.62
   1  -9  11    5.52    1.54
  -1   9 -11    4.17    1.33
  -1  -9 -11    7.94    1.26
  -1  -9 -12   42.22    2.35
  -1   9 -12   39.10    2.55
   1  -9  12   36.72    2.52
  -1   9 -13  104.86    3.99
   1  -9  13   95.07    3.89
   1  -9  14   81.53    3.77
  -1   9 -14   83.05    3.73
  -1  -9 -14   90.84    3.45
  -1  -9 -15   45.86    2.73
  -1   9 -15   42.20    2.97
   1  -9  15   39.76    2.95
  -1   9 -16   36.61    2.75
   1  -9  16   40.87    2.90
  -1   9 -17    1.27    1.41
   1  -9  17    2.30    1.63
  -1  -9 -17   -1.49    1.43
  -1  -9 -18    3.19    1.49
  -1   9 -18    3.11    1.80
   1  -9  18    4.53    1.86
  -1  -9 -19    6.91    1.76
   1  -9  19   11.59    2.24
  -1   9 -19   12.94    2.21
   1  -9  20   15.50    2.33
  -1   9 -20   14.03    2.21
  -1  -9 -20   15.51    2.10
  -1  -9 -21  227.09    6.47
  -1   9 -21  216.82    6.81
   1  -9  21  208.33    6.86
  -1  -9 -22  233.49    6.81
   1  -9  22  218.84    7.22
  -1   9 -22  233.80    7.28
  -1   9 -23  152.05    6.13
   1  -9  23  150.55    6.23
  -1  -9 -23  135.48    5.42
   1  -9  24  151.46    6.42
  -1  -9 -24  131.31    5.42
  -1   9 -24  141.11    6.09
  -1  -9 -24  145.30    5.66
  -1  -9 -25    4.29    1.94
   1  -9  25    6.10    2.40
  -1   9 -25    5.41    2.30
  -1  -9 -25    5.58    1.98
  -1  -9 -26   -0.47    1.91
  -1   9 -26    2.87    2.39
  -1  -9 -26    2.77    2.02
   1  -9  26    2.53    2.41
  -1  -9 -27    2.69    2.26
   1  -9  27    0.54    2.29
  -1   9 -27   -1.70    2.23
   1  -9  28   30.28    3.73
  -1   9 -28   28.67    3.47
  -1  -9 -28   28.30    3.34
  -1  -9 -29  141.34    6.51
  -1   9 -29  154.53    7.04
   1  -9  29  147.83    7.09
   1  -9  30    6.07    2.75
  -1  -9 -30    5.21    2.46
  -1   9 -30    5.22    2.60
  -1  -9 -31   90.50    5.52
  -1   9 -31   88.62    5.79
  -1  -9 -32   12.55    3.04
  -1  -9 -32   16.72    3.28
  -1   9 -32   10.38    3.22
  -1  -9 -33   -0.07    2.64
  -1  -9 -33    2.60    2.70
  -1   9 -33    3.53    2.65
  -1  -9 -34   13.30    3.37
  -1   9 -34   18.37    3.73
  -1  -9 -34   15.28    3.29
  -1   9 -35   -4.79    3.30
  -1  -9 -35    0.49    2.69
  -1  -9 -35   -0.88    2.89
  -1  -9 -36   18.38    3.78
  -1   9 -36   11.11    3.54
  -1  -9 -36   20.16    3.92
  -1  -9 -37   13.17    3.76
  -1  -9 -37   12.57    3.21
  -1   9 -37   14.80    3.79
  -1  -9 -38    0.60    3.28
  -1  -9 -38    3.37    3.01
  -1   9 -38    1.70    3.11
  -1   9 -39   15.24    3.97
  -1  -9 -39   20.61    4.21
  -1  -9 -39   18.36    4.09
  -1  -9 -40   -0.53    3.32
  -1  -9 -40    1.11    3.37
  -1   9 -40   -0.86    3.39
  -1  -9 -41   -0.18    3.38
  -1   9 -41    1.01    3.40
  -1  -9 -42    2.94    3.60
  -1  -9 -43    6.41    4.03
  -1  -9 -44    4.06    3.92
   1 -10 -43   -0.69    3.92
   1 -10 -42    8.20    3.94
   1 -10 -40    4.61    3.57
   1  10 -40    4.03    3.75
   1  10 -39    4.24    3.40
   1 -10 -39    8.89    3.67
   1  10 -38   31.47    4.73
   1 -10 -38   33.31    4.58
   1 -10 -38   44.53    5.32
   1 -10 -37   -0.11    3.14
   1  10 -37   -0.34    2.98
   1 -10 -37   -0.09    3.18
   1  10 -36    4.12    3.32
   1 -10 -36    4.63    3.26
   1 -10 -36    7.75    3.07
   1 -10 -35   -2.23    2.82
   1  10 -35    1.97    3.14
   1 -10 -35    1.14    2.92
   1  10 -34   69.96    5.69
   1 -10 -34   68.69    5.55
   1 -10 -34   72.30    5.56
   1 -10 -33    2.49    2.82
   1 -10 -33    3.51    2.90
   1  10 -33    4.46    3.05
   1 -10 -32   55.99    5.01
   1 -10 -32   58.94    5.03
   1  10 -32   54.47    5.07
   1 -10 -31   52.51    4.88
   1  10 -31   44.62    4.28
   1 -10 -31   48.32    4.46
   1 -10 -30   15.79    3.26
   1 -10 -30   12.66    2.87
   1  10 -30   14.63    3.19
   1 -10 -29  238.53    8.55
   1 -10 -29  231.85    8.27
   1  10 -29  230.86    8.71
   1  10 -28   27.47    3.81
   1 -10 -28   31.00    3.71
   1 -10 -27    4.79    2.38
   1  10 -27    4.08    2.49
  -1 -10  27   -0.96    2.75
   1 -10 -26  473.02   11.05
   1  10 -26  462.56   11.19
  -1 -10  26  482.21   11.83
   1 -10 -25   48.80    4.10
  -1 -10  25   38.06    3.77
   1  10 -25   43.75    3.99
   1 -10 -24  259.18    7.86
   1  10 -24  255.84    8.01
   1 -10 -23    4.35    2.03
  -1 -10  23    4.81    2.12
   1  10 -23    7.50    2.10
  -1 -10  22    1.54    1.92
   1  10 -22   -2.36    1.94
   1 -10 -22   -1.16    1.83
  -1 -10  21   64.25    4.18
   1  10 -21   66.00    4.10
   1 -10 -21   60.85    3.83
   1 -10 -20   19.87    2.60
   1  10 -20   27.70    2.88
  -1 -10  20   25.49    2.88
  -1 -10  19    4.97    1.89
   1 -10 -19    4.56    1.68
   1  10 -19    7.23    2.10
  -1 -10  18 1544.32   17.33
   1 -10 -18 1553.37   16.68
   1  10 -18 1530.17   16.90
   1  10 -17    9.86    2.28
   1 -10 -17    7.03    1.73
   1  10 -16 2020.79   18.46
  -1 -10  16 2028.30   19.07
   1  10 -15  220.04    6.15
  -1 -10  15  224.29    6.36
  -1 -10  14   98.89    4.17
   1 -10 -14  102.92    4.07
   1  10 -14   97.79    4.03
   1  10 -13   37.87    2.66
  -1 -10  13   36.51    2.83
   1 -10 -13   32.58    2.52
  -1 -10  12   62.23    3.42
   1 -10 -12   61.14    3.16
   1  10 -12   64.68    3.36
  -1 -10  11  139.58    4.46
   1 -10 -11  143.46    4.34
   1  10 -11  136.65    4.35
  -1  10  11  147.36    4.43
   1 -10 -10   83.16    3.30
   1  10 -10   72.96    3.22
  -1 -10  10   76.72    3.37
  -1  10  10   86.28    3.41
   1 -10  -9  561.83    8.00
   1  10  -9  555.05    7.97
  -1 -10   9  550.76    8.17
  -1  10   9  580.18    8.25
   1 -10  -8 2076.40   14.80
  -1  10   8 2107.45   15.41
  -1 -10   8 1970.19   14.76
   1  10  -8 1978.38   14.66
   1 -10  -7   27.58    2.02
  -1  10   7   27.56    1.95
  -1 -10   7   20.43    1.78
   1  10  -7   22.94    1.86
  -1 -10   6  213.85    4.68
   1 -10  -6  232.91    4.87
  -1  10   6  230.49    4.93
   1  10  -6  225.73    4.73
   1  10  -5   88.81    2.96
   1 -10  -5   78.63    2.87
  -1  10   5   70.61    2.84
  -1 -10   5   93.25    3.09
  -1 -10   4   30.28    2.09
   1 -10  -4   34.31    2.21
  -1  10   4   34.75    2.38
   1  10  -4   30.65    2.02
   1 -10  -3   68.75    2.68
   1  10  -3   65.75    2.44
  -1  10   3   65.63    2.65
  -1 -10   3   69.76    2.57
  -1 -10   2 2237.88   13.05
   1 -10  -2 2222.83   13.82
  -1 -10   1  389.97    5.40
   1  10  -1  384.15    5.36
  -1  10   1  387.81    5.98
   1 -10  -1  387.16    5.87
   1 -10   0  341.95    5.50
  -1 -10   0  334.55    4.89
  -1  10   0  335.79    5.53
   1  10   0  339.91    4.98
  -1 -10  -1   33.54    1.78
  -1  10  -1   35.92    2.09
   1  10   1   34.55    1.81
   1 -10   1   36.88    2.06
   1 -10   2 1199.69   10.36
  -1  10  -2 1207.29   10.46
  -1 -10  -2 1218.28    8.96
   1  10   2 1184.37    9.19
   1 -10   3  334.11    5.61
  -1  10  -3  326.88    5.55
  -1 -10  -3  324.09    4.71
   1  10   3  329.44    4.88
  -1 -10  -4    5.25    1.02
  -1  10  -4    6.96    1.27
   1  10   4    4.19    1.04
  -1  10  -5  586.06    7.65
   1  10   5  585.98    6.60
   1 -10   5  575.14    7.60
  -1 -10  -6   49.90    2.12
   1 -10   6   59.57    2.80
   1  10   6   44.41    2.14
  -1  10  -6   56.36    2.69
  -1  10  -7   85.26    3.18
   1  10   7   87.73    2.83
   1 -10   7   84.58    3.21
  -1 -10  -7   89.19    2.77
   1  10   8  374.72    5.72
   1 -10   8  360.73    6.54
  -1  10  -8  371.30    6.52
  -1 -10  -8  363.92    5.54
  -1 -10  -9  248.47    4.71
  -1  10  -9  242.29    5.44
   1  10   9  254.20    4.87
   1 -10   9  246.23    5.50
   1 -10  10  155.93    4.65
  -1  10 -10  146.90    4.42
  -1  10 -11   30.09    2.42
   1 -10  11   30.37    2.49
  -1 -10 -11   24.27    1.91
   1 -10  12  771.59   10.50
  -1  10 -12  753.41   10.27
   1 -10  13   18.60    2.17
  -1  10 -13   17.00    1.95
  -1  10 -14  309.05    6.96
  -1 -10 -14  323.37    6.38
  -1 -10 -15  388.62    7.22
  -1  10 -15  384.82    7.95
  -1 -10 -16    3.90    1.46
  -1  10 -16    1.81    1.36
   1 -10  16    1.15    1.53
   1 -10  17    8.51    1.98
  -1 -10 -17    5.52    1.50
  -1  10 -17    5.97    1.82
   1 -10  18    3.78    1.72
  -1  10 -18    2.59    1.76
  -1 -10 -18    3.79    1.58
  -1  10 -19    8.28    1.93
   1 -10  19   10.71    2.04
  -1 -10 -19   10.82    1.83
  -1 -10 -20  249.55    6.67
  -1  10 -20  243.05    7.23
   1 -10  20  235.43    7.44
   1 -10  21  101.10    5.12
  -1 -10 -21  103.13    4.52
  -1  10 -21  100.61    4.92
  -1  10 -22  471.20   10.32
   1 -10  22  447.44   10.43
  -1  10 -23   45.18    3.66
   1 -10  23   44.13    3.80
  -1 -10 -23   44.22    3.44
   1 -10  24   91.27    5.27
  -1  10 -24   91.97    5.07
  -1 -10 -24  107.49    5.13
  -1 -10 -25   18.33    2.65
   1 -10  25   23.11    3.35
  -1  10 -25   14.36    2.50
   1 -10  26    9.73    2.60
  -1  10 -26    9.63    2.58
  -1 -10 -26   12.28    2.59
  -1 -10 -26   13.75    2.60
  -1 -10 -27   11.80    2.62
  -1  10 -27   10.49    2.74
   1 -10  27    8.85    2.77
  -1 -10 -27    8.56    2.51
   1 -10  28   22.88    3.41
  -1 -10 -28   34.70    3.55
  -1 -10 -28   30.38    3.50
  -1  10 -28   27.95    3.66
  -1 -10 -29   27.52    3.41
   1 -10  29   18.79    3.38
  -1  10 -29   25.19    3.64
  -1 -10 -29   22.87    3.20
  -1  10 -30   97.11    5.92
  -1 -10 -30  106.78    5.74
   1 -10  30   85.28    5.70
  -1 -10 -30   91.43    5.52
   1 -10  31   18.33    3.65
  -1 -10 -31   21.50    3.36
  -1 -10 -31   19.74    3.21
  -1  10 -31   24.81    3.59
  -1 -10 -32   25.04    3.68
  -1 -10 -32   25.71    3.50
  -1  10 -32   23.47    3.59
  -1  10 -33    2.42    2.78
  -1 -10 -33    2.70    2.52
  -1 -10 -33    2.46    2.47
  -1 -10 -34    2.13    2.68
  -1 -10 -34    4.31    2.73
  -1  10 -34    1.27    2.72
  -1  10 -35    0.59    2.74
  -1 -10 -35   -2.83    2.91
  -1 -10 -35   -1.20    2.65
  -1  10 -36   12.14    3.66
  -1 -10 -36   12.93    3.50
  -1 -10 -36    9.77    3.27
  -1  10 -37    5.80    3.38
  -1 -10 -37    2.24    3.03
  -1 -10 -37    1.75    3.05
  -1 -10 -38   25.30    4.36
  -1 -10 -38   26.55    4.32
  -1  10 -38   33.33    4.77
  -1 -10 -39   -0.10    3.40
  -1  10 -39    2.97    3.32
  -1 -10 -39    7.30    3.48
  -1  10 -40   12.32    4.18
  -1 -10 -40    8.09    3.74
  -1 -10 -40    6.36    3.75
  -1 -10 -41    2.68    3.58
  -1 -10 -42    6.12    4.09
  -1 -10 -43   -1.24    3.63
  -1 -10 -44   -2.19    4.35
   1 -11 -42    4.56    4.03
   1 -11 -41   11.47    4.38
   1  11 -40    7.28    3.93
   1 -11 -40   -1.40    3.40
   1 -11 -39    9.52    3.74
   1  11 -39    6.74    3.81
   1 -11 -38    4.68    3.38
   1  11 -38    4.31    3.37
   1 -11 -38    6.36    3.49
   1  11 -37   15.92    3.80
   1 -11 -37   15.92    3.96
   1  11 -36    0.44    3.16
   1 -11 -36   -0.71    3.05
   1 -11 -36   -0.05    2.98
   1 -11 -35   13.42    3.51
   1  11 -35   11.19    3.53
   1 -11 -35   18.46    3.73
   1  11 -34   12.16    3.29
   1 -11 -34   12.99    3.38
   1 -11 -34    9.49    3.40
   1 -11 -33   74.54    5.46
   1  11 -33   70.79    5.57
   1 -11 -33   68.17    5.51
   1 -11 -32    8.19    3.25
   1  11 -32    8.50    3.31
   1 -11 -32    8.22    3.06
   1 -11 -31    3.47    2.57
   1 -11 -31    6.47    2.92
   1  11 -31    3.03    2.60
   1  11 -30    3.10    2.67
   1 -11 -30   -0.06    2.57
   1 -11 -29    7.94    2.86
   1  11 -29    5.83    2.91
   1  11 -28   22.87    3.38
   1 -11 -28   19.51    3.23
  -1 -11  28   25.34    3.78
  -1 -11  27   65.10    4.90
   1 -11 -27   75.50    4.97
   1  11 -27   78.14    5.16
   1 -11 -26    8.18    2.53
   1  11 -26    7.34    2.67
  -1 -11  26    4.12    2.42
   1 -11 -25  709.70   13.25
  -1 -11  25  695.38   14.07
   1  11 -25  678.42   13.27
  -1 -11  24   38.85    3.87
   1 -11 -24   30.47    3.32
   1  11 -24   30.50    3.41
   1  11 -23  253.92    8.00
  -1 -11  23  254.99    8.22
   1 -11 -23  263.30    7.81
   1  11 -22    4.98    2.13
  -1 -11  22    2.85    2.12
   1 -11 -22    6.08    2.05
   1  11 -21   27.21    2.95
   1 -11 -21   29.76    2.99
  -1 -11  21   27.23    3.00
  -1 -11  20    0.32    1.86
   1  11 -20    2.76    1.87
   1 -11 -20    1.03    1.66
   1  11 -19    0.24    1.55
  -1 -11  19    1.49    1.69
   1 -11 -19   -1.13    1.51
   1 -11 -18   -0.94    1.47
  -1 -11  18   -2.65    1.98
   1  11 -18    0.52    1.57
   1  11 -17  268.53    7.15
  -1 -11  17  269.66    7.42
   1  11 -16   33.25    2.78
   1 -11 -16   24.46    2.42
  -1 -11  16   30.97    2.77
  -1 -11  15    7.69    1.73
   1  11 -15   10.49    1.89
   1  11 -14    8.59    1.88
   1 -11 -14    8.48    1.74
  -1 -11  14    9.08    1.96
   1  11 -13   38.09    2.80
  -1 -11  13   39.37    2.85
   1 -11 -13   34.81    2.57
  -1 -11  12   17.21    2.02
   1  11 -12   14.61    1.90
   1 -11 -12   15.90    1.84
   1  11 -11   87.29    3.67
   1 -11 -11   89.70    3.63
  -1  11  11   94.54    3.81
  -1 -11  11   86.05    3.74
  -1 -11  10    3.60    1.39
  -1  11  10    6.72    1.65
   1  11 -10    4.56    1.35
   1 -11 -10    3.46    1.24
  -1  11   9  150.76    4.39
   1 -11  -9  142.84    4.20
  -1 -11   9  147.19    4.48
   1  11  -9  140.50    4.29
  -1  11   8  334.63    6.45
   1  11  -8  317.65    6.08
   1 -11  -8  325.80    6.15
  -1 -11   8  317.22    6.21
  -1 -11   7   53.25    2.64
   1 -11  -7   56.80    2.69
   1  11  -7   57.14    2.67
  -1  11   7   58.37    2.80
  -1 -11   6  247.86    5.16
   1  11  -6  247.38    5.10
   1 -11  -6  243.82    5.12
  -1  11   6  241.83    5.21
   1  11  -5    0.21    0.90
  -1 -11   5   -0.86    1.04
  -1  11   5    1.52    1.04
   1 -11  -5   -0.38    0.97
   1 -11  -4   25.90    1.84
  -1  11   4   28.46    1.89
   1  11  -4   26.68    1.74
  -1 -11   4   24.87    1.76
   1 -11  -3   62.06    2.67
  -1  11   3   59.16    2.69
  -1 -11   3   60.54    2.58
   1  11  -3   58.54    2.49
  -1 -11   2  158.07    3.71
   1 -11  -2  155.10    3.93
  -1  11   2  152.40    3.98
   1  11  -2  149.12    3.56
   1  11  -1   16.84    1.48
  -1  11   1   18.35    1.67
   1 -11  -1   18.14    1.63
  -1 -11   1   16.61    1.51
  -1  11   0   39.02    2.16
   1  11   0   35.80    1.85
  -1 -11   0   35.65    1.84
   1 -11   0   35.87    2.08
   1  11   1 1184.97    9.59
   1 -11   1 1155.17   10.55
  -1  11  -1 1151.35   10.68
  -1 -11  -1 1145.80    9.35
   1  11   2  401.60    5.63
  -1  11  -2  414.74    6.45
   1 -11   2  421.64    6.44
  -1 -11  -2  434.49    5.70
   1  11   3   22.61    1.74
  -1 -11  -3   18.54    1.54
  -1  11  -3   23.99    2.03
   1 -11   3   24.94    1.99
  -1 -11  -4    3.69    1.00
   1 -11   4    4.61    1.26
   1  11   4    4.01    1.01
  -1  11  -4    4.04    1.17
  -1 -11  -5   13.74    1.36
   1 -11   5   12.05    1.58
   1  11   5   16.28    1.37
  -1  11  -5   12.04    1.44
  -1  11  -6  331.14    6.18
   1  11   6  340.69    5.45
   1 -11   6  336.94    6.24
  -1 -11  -6  339.33    5.32
   1  11   7    2.05    1.05
  -1  11  -7    2.82    1.26
  -1 -11  -7    2.35    1.01
   1 -11   7    2.62    1.26
   1 -11   8  105.88    3.74
  -1 -11  -8  107.89    3.21
  -1  11  -8  105.55    3.69
   1  11   8  111.55    3.28
  -1 -11  -9    4.85    1.17
   1  11   9    6.02    1.21
   1 -11   9    6.48    1.53
  -1  11  -9    5.88    1.41
  -1  11 -10  103.37    3.82
   1 -11  10  102.68    3.91
  -1 -11 -10  107.01    3.34
   1  11  10  107.42    3.50
   1 -11  11  326.77    6.90
  -1 -11 -11  345.06    6.03
  -1  11 -11  331.39    6.85
  -1 -11 -12   91.54    3.36
  -1  11 -12   95.62    3.97
   1 -11  12   99.33    4.13
  -1  11 -13 1110.25   13.05
  -1 -11 -13 1090.65   11.29
   1 -11  13 1124.61   13.45
  -1 -11 -14  411.22    7.26
   1 -11  14  421.34    8.49
  -1  11 -14  401.97    8.16
  -1 -11 -15  628.32    9.13
   1 -11  15  617.05   10.46
  -1  11 -15  610.73   10.28
  -1  11 -16  193.73    6.00
  -1 -11 -16  201.90    5.49
   1 -11  16  197.69    6.14
  -1  11 -17   22.04    2.31
   1 -11  17   17.22    2.18
  -1 -11 -18    1.38    1.45
  -1  11 -18    1.71    1.54
   1 -11  18    1.82    1.78
  -1  11 -19   78.66    4.26
  -1 -11 -19   85.92    4.01
   1 -11  19   84.65    4.52
  -1 -11 -20   27.13    2.56
  -1  11 -20   27.93    2.95
   1 -11  20   24.71    2.87
   1 -11  21  511.71   10.95
  -1 -11 -21  534.79    9.96
  -1  11 -22   42.15    3.74
   1 -11  22   40.19    3.54
  -1  11 -23   55.54    4.14
  -1 -11 -23   49.03    3.65
   1 -11  23   52.80    4.16
   1 -11  24   19.14    2.95
  -1 -11 -24   22.35    2.86
  -1  11 -24   17.92    2.81
   1 -11  25    0.57    2.22
  -1 -11 -25    2.55    2.04
  -1  11 -25   -0.26    2.21
   1 -11  26   96.41    5.68
  -1 -11 -26   83.18    4.83
  -1  11 -26   91.07    5.31
  -1 -11 -27   40.57    3.88
  -1  11 -27   43.82    4.32
  -1 -11 -27   34.35    3.61
   1 -11  27   36.67    4.05
  -1 -11 -28  131.38    6.07
  -1 -11 -28  121.93    5.91
  -1  11 -28  146.09    6.76
   1 -11  28  137.01    6.97
  -1 -11 -29  134.06    6.36
   1 -11  29  149.12    7.25
  -1 -11 -29  150.94    6.69
  -1  11 -29  144.98    6.95
  -1  11 -30   15.19    3.14
  -1 -11 -30   17.33    3.13
   1 -11  30   12.42    3.08
  -1 -11 -30    9.88    2.88
  -1  11 -31   95.65    5.92
  -1 -11 -31  108.57    5.99
  -1 -11 -31   95.64    5.68
   1 -11  31   91.40    6.22
   1 -11  32    4.71    3.09
  -1 -11 -32    7.45    2.97
  -1 -11 -32    6.16    2.85
  -1  11 -32    9.91    3.26
  -1 -11 -33    4.34    2.70
  -1 -11 -33    7.47    3.17
  -1  11 -33    4.73    2.63
  -1 -11 -34    2.28    2.64
  -1 -11 -34    3.82    3.10
  -1  11 -34    2.90    2.71
  -1 -11 -35    7.95    3.25
  -1 -11 -35    5.66    2.75
  -1  11 -35    6.83    3.40
  -1  11 -36   -3.43    3.04
  -1 -11 -36    2.14    2.86
  -1 -11 -36    2.11    2.81
  -1 -11 -37   13.19    3.68
  -1  11 -37   14.48    3.80
  -1 -11 -37    9.50    3.37
  -1 -11 -38    0.04    3.19
  -1 -11 -38   -0.10    3.06
  -1  11 -38    2.04    3.39
  -1 -11 -39    8.87    3.49
  -1  11 -39   20.02    4.37
  -1 -11 -39   17.22    4.04
  -1  11 -40    0.30    3.49
  -1 -11 -40   -0.17    3.55
  -1 -11 -41   10.64    4.11
  -1 -11 -42    1.16    3.48
  -1 -11 -44   -1.77    3.96
   1 -12 -42    8.56    4.11
   1 -12 -41    7.57    4.23
   1 -12 -40    3.20    3.63
   1  12 -39    5.59    3.49
   1 -12 -39   -0.31    3.45
   1  12 -38    3.32    3.23
   1 -12 -38   12.63    3.94
   1 -12 -38    6.79    3.25
   1 -12 -37    5.43    3.49
   1  12 -37   11.15    3.72
   1 -12 -37    9.12    3.75
   1 -12 -36    1.92    3.01
   1  12 -36    0.64    3.03
   1 -12 -36   -0.24    3.10
   1  12 -35   14.80    3.61
   1 -12 -35   17.34    3.95
   1 -12 -35   14.37    3.63
   1  12 -34    5.41    3.12
   1 -12 -34    9.28    3.29
   1 -12 -34    9.13    3.15
   1  12 -33    2.51    2.82
   1 -12 -33    3.29    2.93
   1 -12 -33   -2.43    2.79
   1 -12 -32   64.32    5.21
   1  12 -32   52.21    4.97
   1 -12 -31    2.11    2.66
   1  12 -31   -3.66    2.79
   1 -12 -31    3.50    2.72
   1 -12 -30   27.07    3.70
   1  12 -30   27.67    3.84
   1  12 -29    0.82    2.43
  -1 -12  29    1.07    2.58
   1 -12 -29    2.07    2.39
   1 -12 -28    6.51    2.65
  -1 -12  28    5.05    2.75
   1  12 -28    4.24    2.71
   1 -12 -27   -1.11    2.17
  -1 -12  27   -0.80    2.44
   1  12 -27    2.82    2.41
   1  12 -26  196.41    7.61
  -1 -12  26  210.77    8.20
   1 -12 -26  202.22    7.56
   1  12 -25    6.68    2.56
   1 -12 -25    0.79    2.20
  -1 -12  25    5.51    2.64
   1 -12 -24   53.05    4.01
   1  12 -24   44.11    3.93
  -1 -12  24   42.43    4.01
   1 -12 -23   73.33    4.49
  -1 -12  23   64.97    4.65
   1  12 -23   63.60    4.41
   1  12 -22   12.31    2.39
  -1 -12  22   15.23    2.78
   1 -12 -22   13.68    2.38
  -1 -12  21    2.12    2.04
   1 -12 -21    1.62    1.74
   1  12 -21    2.36    1.79
   1 -12 -20   10.15    2.12
  -1 -12  20    3.40    1.95
   1  12 -20    9.55    2.16
  -1 -12  19    1.05    1.82
   1  12 -19    4.43    1.73
   1 -12 -19    1.65    1.63
   1  12 -18  689.92   11.75
  -1 -12  18  705.50   12.30
   1 -12 -18  685.97   11.26
   1 -12 -17  395.22    8.40
  -1 -12  17  415.91    9.29
   1  12 -17  406.46    8.88
   1  12 -16 1084.51   14.03
  -1 -12  16 1084.24   14.35
   1 -12 -16 1084.30   13.46
  -1 -12  15  153.46    5.40
   1  12 -15  156.72    5.36
   1 -12 -15  165.44    5.26
  -1 -12  14   40.06    2.86
   1  12 -14   36.92    2.78
   1 -12 -14   38.63    2.71
   1  12 -13    6.10    1.56
   1 -12 -13    6.33    1.55
  -1 -12  13    8.52    1.68
  -1 -12  12  557.10    9.28
   1 -12 -12  532.68    8.70
  -1  12  12  517.73    8.77
   1  12 -12  552.59    9.09
  -1 -12  11   89.31    3.79
   1  12 -11   87.77    3.65
   1 -12 -11   99.21    3.77
  -1  12  11  100.32    3.89
  -1  12  10   63.33    3.09
  -1 -12  10   50.63    2.95
   1 -12 -10   63.71    3.08
   1  12 -10   55.51    2.96
  -1  12   9    3.69    1.41
  -1 -12   9    5.27    1.43
   1 -12  -9    1.77    1.30
   1  12  -9    4.06    1.26
   1  12  -8  345.23    6.51
  -1  12   8  353.18    6.70
  -1 -12   8  336.74    6.57
   1 -12  -8  347.65    6.43
   1 -12  -7    1.73    1.10
  -1  12   7    3.42    1.23
  -1 -12   7   -0.54    1.14
   1  12  -7    0.64    1.07
  -1 -12   6    7.14    1.50
  -1  12   6    3.64    1.30
   1 -12  -6    3.09    1.23
   1  12  -6    5.66    1.36
  -1  12   5   64.89    2.90
   1  12  -5   69.82    2.80
  -1 -12   5   66.53    2.81
   1 -12  -5   67.60    2.84
  -1  12   4  268.31    5.49
   1  12  -4  265.96    5.26
  -1 -12   4  245.99    5.04
   1 -12  -4  265.50    5.40
  -1 -12   3  431.95    6.46
   1 -12  -3  439.64    6.79
   1  12  -3  434.31    6.50
  -1  12   3  451.27    7.09
   1 -12  -2   99.33    3.36
  -1 -12   2  104.14    3.24
   1  12  -2  100.47    3.15
  -1  12   2   91.85    3.32
  -1 -12   1  296.44    5.18
   1  12  -1  304.80    5.25
  -1  12   1  300.75    5.79
   1 -12  -1  287.89    5.45
   1  12   0  862.90    8.73
  -1  12   0  848.54    9.51
   1 -12   0  842.62    9.27
   1  12   1  246.89    4.66
  -1  12  -1  244.36    5.23
   1 -12   1  240.05    5.08
  -1 -12  -2  385.69    5.72
   1 -12   2  362.01    6.31
  -1  12  -2  372.43    6.43
   1  12   2  367.02    5.75
   1  12   3  391.35    5.89
  -1  12  -3  378.80    6.50
   1 -12   3  382.39    6.46
  -1 -12  -3  375.89    5.59
   1  12   4  573.93    7.16
  -1 -12  -4  578.08    7.00
   1 -12   4  576.95    8.08
  -1  12  -4  561.35    7.97
  -1  12  -5  258.26    5.57
   1 -12   5  252.05    5.52
  -1 -12  -5  263.86    4.79
   1  12   5  266.35    4.93
   1  12   6   11.15    1.37
  -1  12  -6   10.31    1.57
  -1 -12  -6   11.44    1.38
   1 -12   6    9.54    1.59
  -1 -12  -7    6.82    1.23
   1 -12   7    7.45    1.58
  -1  12  -7    9.55    1.65
   1  12   7    6.68    1.32
   1 -12   8    1.40    1.36
  -1  12  -8    0.92    1.16
   1  12   8    3.14    1.25
  -1 -12  -8    2.88    1.10
   1 -12   9  209.36    5.48
  -1  12  -9  204.45    5.34
   1  12   9  181.52    4.43
  -1 -12  -9  187.41    4.42
  -1  12 -10   17.42    2.12
   1  12  10   15.25    1.79
   1 -12  10   16.85    2.06
  -1 -12 -10   13.87    1.66
  -1  12 -11    9.80    1.79
   1 -12  11   11.97    1.97
  -1 -12 -11    8.41    1.53
   1 -12  12  198.88    5.74
  -1  12 -12  199.21    5.65
  -1  12 -13  155.55    5.12
  -1 -12 -13  145.57    4.30
   1 -12  13  156.12    5.18
  -1  12 -14   59.48    3.43
   1 -12  14   57.74    3.47
  -1 -12 -14   67.74    3.14
  -1  12 -15   38.79    2.98
   1 -12  15   37.64    2.97
  -1 -12 -15   35.08    2.47
  -1  12 -16    6.71    1.79
   1 -12  16    4.33    1.59
  -1 -12 -16    6.74    1.58
   1 -12  17    4.10    1.94
  -1 -12 -17    3.41    1.62
  -1  12 -17    3.85    1.78
   1 -12  18    3.03    1.80
  -1 -12 -18    3.71    1.60
  -1  12 -18    6.13    2.02
  -1 -12 -19   31.73    2.79
   1 -12  19   34.23    3.21
   1 -12  20   93.12    4.92
  -1  12 -20  101.09    4.99
  -1  12 -21  134.20    5.67
  -1 -12 -21  125.50    5.13
   1 -12  21  125.73    5.77
   1 -12  22  365.77    9.66
  -1  12 -22  364.85    9.37
  -1 -12 -22  386.63    8.88
   1 -12  23    9.73    2.78
  -1 -12 -23    7.74    2.31
  -1  12 -23    5.14    2.39
   1 -12  24    1.11    2.17
  -1 -12 -24    4.88    2.15
  -1  12 -24    1.40    2.06
  -1  12 -25   15.64    2.89
   1 -12  25   15.05    2.97
  -1 -12 -25   12.49    2.47
   1 -12  26   39.50    3.94
  -1 -12 -26   29.54    3.19
  -1  12 -26   36.01    3.89
  -1 -12 -27   48.44    3.97
   1 -12  27   52.31    4.63
  -1  12 -27   52.44    4.56
   1 -12  28    6.88    3.03
  -1 -12 -28   11.75    2.67
  -1 -12 -28    8.11    2.55
  -1  12 -28    9.42    2.92
   1 -12  29   29.72    4.02
  -1 -12 -29   22.27    3.40
  -1  12 -29   26.75    3.77
  -1 -12 -29   21.00    3.31
  -1  12 -30   88.26    5.86
  -1 -12 -30   85.32    5.39
  -1 -12 -30   74.64    5.13
  -1 -12 -31    5.34    2.68
  -1 -12 -31    2.55    2.57
   1 -12  31    6.17    3.16
  -1  12 -31    6.78    3.28
  -1 -12 -32   20.23    3.44
   1 -12  32   23.20    4.02
  -1 -12 -32   19.83    3.43
  -1  12 -32   25.92    4.08
  -1 -12 -33    7.12    3.09
  -1  12 -33    0.90    2.67
  -1 -12 -33    0.34    2.57
   1 -12  33    6.25    3.06
  -1 -12 -34    1.07    2.65
  -1 -12 -34    1.70    2.83
  -1  12 -34   -0.42    2.88
  -1  12 -35   11.27    3.42
  -1 -12 -35   13.24    3.48
  -1 -12 -35   11.68    3.24
  -1 -12 -36    4.76    3.01
  -1  12 -36    2.98    3.01
  -1 -12 -36    2.02    2.93
  -1  12 -37    0.89    3.21
  -1 -12 -37   -2.67    2.98
  -1 -12 -37    6.24    3.42
  -1  12 -38   17.33    4.04
  -1 -12 -38   10.45    3.54
  -1 -12 -38   17.12    3.85
  -1 -12 -39   -0.07    3.24
  -1  12 -39    1.12    3.43
  -1 -12 -39    2.20    3.14
  -1 -12 -40   11.04    3.80
  -1 -12 -41   14.10    4.39
  -1 -12 -42    4.94    3.83
  -1 -12 -43   16.56    4.43
  -1 -12 -44    3.40    4.15
   1 -13 -42    2.28    3.88
   1 -13 -41   -0.46    3.56
   1 -13 -40   -2.49    3.74
   1  13 -39   20.72    4.54
   1 -13 -39   22.18    4.51
   1 -13 -38    3.53    3.39
   1  13 -38   -5.18    3.35
   1 -13 -38    6.20    3.51
   1 -13 -37   11.29    3.57
   1  13 -37    6.21    3.59
   1 -13 -37    5.87    3.40
   1 -13 -36   33.65    4.67
   1  13 -36   45.56    5.22
   1 -13 -36   35.30    4.67
   1 -13 -35    6.08    3.28
   1 -13 -35    3.71    3.28
   1  13 -35    6.33    3.52
   1 -13 -34   21.02    3.84
   1 -13 -34   21.78    3.91
   1  13 -34   15.00    3.42
   1  13 -33   -2.92    3.01
   1 -13 -33   -2.04    2.89
   1 -13 -33    3.09    2.93
   1 -13 -32    7.81    3.00
   1 -13 -32   12.20    3.25
   1  13 -32   12.89    3.44
   1  13 -31   18.07    3.49
   1 -13 -31   18.52    3.67
   1  13 -30   32.24    4.27
   1 -13 -30   37.32    4.22
  -1 -13  30   33.58    4.20
  -1 -13  29   39.88    4.37
   1  13 -29   42.40    4.21
   1 -13 -29   43.04    4.15
   1  13 -28   19.13    3.32
   1 -13 -28   24.86    3.67
  -1 -13  28   21.15    3.47
  -1 -13  27   -0.89    2.62
   1  13 -27    3.17    2.46
   1 -13 -27    1.66    2.33
  -1 -13  26   39.49    4.27
   1  13 -26   32.36    3.66
  -1 -13  25   88.89    5.44
   1  13 -25   94.24    5.49
  -1 -13  24   34.40    3.79
   1  13 -24   29.20    3.31
   1 -13 -24   25.63    3.19
   1  13 -23   23.07    3.22
  -1 -13  23   22.82    3.23
   1 -13 -23   14.91    2.72
  -1 -13  22   20.55    3.12
   1  13 -22   23.04    3.12
   1 -13 -21  133.62    5.58
  -1 -13  21  144.85    6.22
   1  13 -21  144.23    6.07
   1  13 -20    7.19    2.21
   1 -13 -20    1.41    1.75
  -1 -13  20    2.49    2.01
   1  13 -19   43.13    3.41
   1 -13 -19   43.11    3.19
  -1 -13  19   42.87    3.52
  -1 -13  18   29.53    3.08
   1 -13 -18   34.46    2.98
   1  13 -18   29.75    2.96
   1 -13 -17  100.63    4.47
  -1 -13  17   92.97    4.67
   1  13 -17   89.62    4.40
   1 -13 -16    5.22    1.89
  -1 -13  16    2.30    1.73
   1  13 -16    5.05    1.75
   1 -13 -15   12.27    2.08
   1  13 -15   10.51    1.97
  -1 -13  15    8.48    2.14
   1  13 -14  153.76    5.24
  -1 -13  14  153.91    5.37
   1 -13 -13    6.75    1.56
  -1 -13  13    7.26    1.80
   1  13 -13   12.26    1.96
   1 -13 -12  143.76    4.63
  -1  13  12  132.55    4.64
  -1 -13  12  144.31    4.96
   1  13 -12  140.46    4.82
  -1 -13  11    1.80    1.46
   1 -13 -11    2.41    1.40
   1  13 -11    3.21    1.51
  -1  13  11    3.03    1.41
  -1 -13  10  466.80    8.33
   1 -13 -10  449.83    7.87
   1  13 -10  461.46    8.06
   1  13  -9  126.55    4.29
   1 -13  -9  129.53    4.25
  -1  13   9  134.66    4.54
  -1 -13   9  120.71    4.37
   1  13  -8  122.82    4.19
   1 -13  -8  123.58    4.16
  -1 -13   8  128.26    4.34
  -1  13   7  901.69   10.78
  -1 -13   7  914.63   10.63
   1  13  -7  920.57   10.57
   1 -13  -6 1361.27   12.62
   1  13  -6 1362.01   12.48
  -1 -13   6 1360.11   12.63
  -1  13   5   85.97    3.42
   1 -13  -5   89.86    3.40
   1  13  -5   94.91    3.37
  -1 -13   5   91.04    3.35
   1 -13  -4   12.18    1.55
  -1  13   4   12.04    1.46
  -1 -13   4   13.27    1.53
   1  13  -4   12.55    1.52
   1 -13  -3   86.37    3.30
  -1 -13   3   88.58    3.20
  -1  13   3   90.22    3.39
   1  13  -3   82.70    2.98
   1 -13  -2    5.57    1.36
  -1  13   2    7.35    1.43
  -1 -13   2    7.13    1.32
   1  13  -2    6.27    1.26
   1  13  -1  126.79    3.61
  -1 -13   1  112.07    3.45
   1 -13  -1  120.55    3.79
  -1  13   1  125.79    3.98
   1  13   0  223.05    4.69
   1 -13   0  226.33    5.09
  -1 -13   0  228.42    4.69
  -1  13   0  219.61    5.12
  -1 -13  -1   92.79    3.06
  -1  13  -1   94.61    3.52
   1  13   1   95.12    3.15
   1 -13   1   88.39    3.33
  -1 -13  -2  949.50    9.28
   1  13   2  923.14    9.38
  -1  13  -2  935.14   10.49
   1 -13   2  933.54   10.35
   1 -13   3   11.54    1.74
  -1  13  -3   11.90    1.83
  -1 -13  -3   10.18    1.43
   1  13   3   10.43    1.58
   1  13   4  179.82    4.26
  -1 -13  -4  178.38    4.13
  -1  13  -4  183.59    4.83
   1 -13   4  183.85    4.87
   1 -13   5    4.20    1.36
  -1  13  -5    1.97    1.34
  -1 -13  -5    2.42    1.04
   1  13   5    4.25    1.18
   1 -13   6  229.02    5.55
  -1  13  -6  217.36    5.44
   1  13   6  221.18    4.82
  -1 -13  -6  228.46    4.70
   1  13   7  454.82    6.91
  -1 -13  -7  460.01    6.79
  -1  13  -7  464.65    7.91
   1 -13   7  459.31    7.89
  -1 -13  -8  124.82    3.68
   1 -13   8  123.64    4.31
  -1  13  -8  124.01    4.24
   1  13   8  120.37    3.71
   1  13   9  330.10    6.12
  -1  13  -9  344.13    7.04
  -1 -13  -9  343.55    6.09
  -1 -13 -10 1203.15   11.47
   1 -13  10 1240.97   13.61
  -1  13 -10 1218.69   13.39
  -1  13 -11   37.99    2.73
   1  13  11   37.65    2.47
   1 -13  11   38.43    2.79
  -1 -13 -11   37.06    2.30
  -1 -13 -12  379.86    6.82
  -1  13 -12  386.53    7.95
   1 -13  12  376.16    8.05
  -1  13 -13  904.69   12.27
   1 -13  13  922.97   12.70
  -1 -13 -14    2.52    1.37
   1 -13  14    0.31    1.66
  -1  13 -14    1.95    1.62
   1 -13  15   19.33    2.54
  -1 -13 -15   15.91    1.97
  -1  13 -15   16.61    2.41
   1 -13  16  119.64    5.08
  -1  13 -16  110.75    4.79
  -1 -13 -16  105.23    4.15
   1 -13  17  422.18    9.38
  -1 -13 -17  425.01    8.24
  -1  13 -17  424.16    9.21
  -1  13 -18  126.72    5.27
   1 -13  18  131.58    5.44
  -1 -13 -18  121.36    4.57
  -1  13 -19    3.42    1.96
  -1 -13 -19    0.76    1.46
   1 -13  20   16.65    2.68
  -1  13 -20   16.93    2.51
  -1 -13 -20   11.65    2.12
   1 -13  21   15.32    2.64
  -1 -13 -21   24.00    2.57
  -1  13 -21   22.57    2.86
  -1  13 -22    3.78    1.99
   1 -13  22    1.89    2.12
  -1 -13 -22    3.89    1.87
   1 -13  23   15.40    3.00
  -1 -13 -23   13.01    2.51
  -1  13 -23   14.60    2.83
   1 -13  24    6.45    2.37
  -1  13 -24    4.08    2.19
  -1 -13 -24    5.97    2.37
  -1 -13 -25    6.25    2.24
   1 -13  25    4.45    2.45
  -1  13 -25    4.26    2.30
   1 -13  26   16.07    3.24
  -1  13 -26   14.17    3.09
  -1 -13 -26   15.38    2.84
   1 -13  27    4.79    2.79
  -1 -13 -27    2.11    2.47
  -1  13 -27    7.17    2.90
  -1  13 -28    4.92    2.53
   1 -13  28    1.81    2.64
  -1 -13 -28    9.25    2.69
  -1 -13 -29   72.91    4.85
  -1 -13 -29   86.17    5.25
  -1  13 -29   79.47    5.52
   1 -13  29   77.98    5.66
  -1  13 -30    8.44    2.84
  -1 -13 -30    7.50    2.71
  -1 -13 -30    7.82    2.62
   1 -13  30    7.49    3.10
   1 -13  31   27.73    4.27
  -1  13 -31   29.71    4.01
  -1 -13 -31   31.98    3.92
  -1 -13 -31   27.44    3.67
  -1 -13 -32    7.40    2.92
  -1  13 -32    5.40    2.88
  -1 -13 -32   10.91    3.10
   1 -13  32    8.15    3.25
  -1  13 -33   18.49    3.78
  -1 -13 -33   21.51    3.61
  -1 -13 -33   17.61    3.36
   1 -13  33   13.88    3.59
  -1 -13 -34   13.68    3.27
  -1  13 -34    9.70    3.37
  -1 -13 -34   10.95    3.29
   1 -13  34    7.24    3.51
  -1 -13 -35   44.87    4.76
  -1 -13 -35   59.10    5.34
  -1  13 -35   52.20    5.49
  -1 -13 -36    3.61    3.08
  -1 -13 -36   -0.43    2.88
  -1  13 -36    3.75    3.23
  -1 -13 -37    2.12    3.06
  -1 -13 -37    5.91    3.35
  -1  13 -37    3.34    3.44
  -1 -13 -38    4.08    3.46
  -1 -13 -38    4.51    3.27
  -1  13 -38    1.15    3.29
  -1 -13 -39   12.02    3.92
  -1  13 -39    9.94    3.94
  -1 -13 -39   11.04    3.94
  -1 -13 -40   -0.94    3.50
  -1 -13 -41    9.13    3.89
  -1 -13 -42    0.95    3.66
  -1 -13 -43   12.02    4.33
   1 -14 -41    7.85    4.38
   1 -14 -40    3.06    3.79
   1 -14 -39   12.05    4.21
   1 -14 -38   32.46    4.99
   1  14 -38   39.08    5.25
   1 -14 -37   11.33    3.92
   1 -14 -37    3.73    3.65
   1  14 -37   16.98    4.27
   1 -14 -36    7.50    3.71
   1  14 -36    4.69    3.38
   1 -14 -36    7.14    3.60
   1 -14 -35   14.22    3.62
   1  14 -35   15.88    3.86
   1 -14 -35   21.24    4.18
   1 -14 -34   17.30    3.65
   1 -14 -34   23.88    4.08
   1  14 -34   20.08    3.73
   1  14 -33   17.95    3.76
   1 -14 -33   15.90    3.53
   1 -14 -33   21.22    3.86
   1 -14 -32   12.88    3.57
   1  14 -32   13.49    3.43
   1 -14 -31   -0.28    2.78
  -1 -14  31   -0.57    2.98
   1  14 -31    2.38    2.88
   1 -14 -30  230.74    8.84
  -1 -14  30  211.90    9.10
   1  14 -30  228.13    9.07
  -1 -14  29    0.92    2.72
   1 -14 -29    7.24    2.82
   1  14 -29    4.44    2.70
  -1 -14  28   14.24    3.42
   1  14 -28   12.19    2.98
   1 -14 -28   14.25    2.97
  -1 -14  27    5.43    2.62
   1 -14 -27   15.02    3.01
   1  14 -27   12.04    2.88
   1 -14 -26    2.15    2.32
  -1 -14  26    4.57    2.58
   1  14 -26    2.84    2.41
  -1 -14  25   47.98    4.43
   1 -14 -25   45.17    3.95
   1  14 -25   50.79    4.46
   1  14 -24   33.95    3.82
  -1 -14  24   39.71    4.15
   1 -14 -24   30.23    3.54
  -1 -14  23   69.04    4.83
   1  14 -23   79.62    5.04
   1  14 -22  179.53    6.94
   1 -14 -22  171.25    6.49
  -1 -14  22  181.83    7.11
  -1 -14  21   82.41    4.87
   1  14 -21   86.65    4.96
   1 -14 -21   80.54    4.46
  -1 -14  20  316.91    8.88
   1 -14 -20  309.15    8.19
   1  14 -20  310.70    8.54
   1  14 -19   15.80    2.72
   1 -14 -19   13.36    2.42
  -1 -14  19   12.74    2.54
   1 -14 -18    0.21    1.63
   1  14 -18   -2.67    1.98
  -1 -14  18   -0.26    1.84
   1 -14 -17    1.44    1.48
  -1 -14  17    0.93    1.74
   1  14 -17    3.55    1.84
   1 -14 -16   65.84    3.73
  -1 -14  16   65.34    4.08
   1  14 -16   62.63    3.84
  -1 -14  15  131.05    5.25
   1 -14 -15  130.40    4.91
   1  14 -15  122.91    4.98
  -1 -14  14   39.99    3.36
   1 -14 -14   31.79    2.85
   1  14 -14   36.16    3.14
   1 -14 -13  574.51    9.55
  -1  14  13  558.91    9.63
  -1 -14  13  598.96   10.31
   1  14 -13  586.75   10.02
  -1  14  12  147.40    4.99
   1 -14 -12  147.99    4.90
  -1 -14  12  165.65    5.43
   1  14 -12  164.37    5.28
   1  14 -11   80.29    3.70
  -1  14  11   81.42    3.81
  -1 -14  11   90.42    4.13
   1 -14 -11   81.87    3.65
   1 -14 -10   29.78    2.47
   1  14 -10   33.76    2.64
  -1 -14  10   36.22    2.81
  -1  14  10   28.27    2.75
   1  14  -9   26.45    2.37
  -1  14   9   23.26    2.29
   1 -14  -9   27.00    2.28
  -1 -14   9   30.49    2.56
  -1  14   8   14.59    1.85
   1  14  -8   20.72    2.03
   1 -14  -8   17.22    1.93
  -1 -14   8   19.00    2.03
   1 -14  -7  113.46    3.93
  -1  14   7  115.64    4.17
   1  14  -7  115.21    3.99
  -1 -14   7  116.74    4.07
  -1  14   6  113.26    4.27
   1  14  -6  110.50    4.04
  -1 -14   6  114.78    4.14
   1 -14  -6  122.05    4.19
  -1  14   5  870.24   10.74
   1  14  -5  892.45   10.29
  -1  14   4   75.53    3.38
   1 -14  -4   74.93    3.30
   1  14  -4   69.63    3.09
  -1  14   3  372.42    6.89
   1 -14  -3  361.03    6.68
   1  14  -3  364.78    6.47
  -1 -14   3  381.93    6.65
   1  14  -2   20.26    1.81
   1 -14  -2   21.14    1.96
  -1 -14   2   20.54    1.89
  -1  14   2   23.01    2.04
   1 -14  -1 1043.13   11.07
  -1  14   1 1016.17   11.27
  -1 -14   1 1031.63   10.30
   1  14  -1 1040.23   10.55
   1  14   0   41.85    2.48
  -1  14   0   50.00    2.86
  -1 -14   0   43.73    2.52
   1 -14   0   46.65    2.86
   1  14   1  121.94    3.71
   1 -14   1  120.93    3.96
  -1  14  -1  112.96    3.94
  -1 -14  -1  119.93    3.56
  -1 -14  -2   79.16    3.04
   1 -14   2   81.21    3.40
  -1  14  -2   80.91    3.47
   1  14   2   78.65    3.14
   1 -14   3   75.82    3.35
   1  14   3   79.58    3.04
  -1  14  -3   79.77    3.37
  -1 -14  -3   80.64    2.99
   1 -14   4  287.81    6.21
   1  14   4  271.62    5.40
  -1 -14  -4  284.39    5.30
  -1  14  -4  277.86    6.10
   1 -14   5    7.77    1.63
  -1 -14  -5    5.56    1.31
  -1  14  -5    4.35    1.49
   1  14   5    9.48    1.56
  -1  14  -6  112.66    4.08
  -1 -14  -6  110.61    3.48
  -1 -14  -7  622.97    8.08
   1 -14   7  599.55    9.24
  -1  14  -7  600.71    9.26
   1  14   7  599.95    8.27
   1  14   8  342.46    6.29
  -1  14  -8  327.01    7.07
  -1 -14  -8  331.05    6.07
   1 -14   8  320.09    6.96
   1  14   9 1451.87   13.21
  -1  14  -9 1411.80   14.50
  -1 -14  -9 1416.06   12.51
   1  14  10  413.86    7.24
   1 -14  10  375.34    7.76
  -1  14 -10  378.04    7.68
  -1 -14 -10  399.79    6.83
  -1 -14 -11   42.21    2.54
  -1  14 -11   37.96    2.79
   1 -14  11   36.91    2.85
   1  14  11   45.16    2.67
  -1 -14 -12    7.92    1.64
  -1  14 -12    7.50    1.78
   1  14  12   10.45    1.73
   1 -14  12    4.96    1.72
  -1  14 -13   15.97    2.14
   1 -14  13   16.67    2.30
  -1 -14 -13   12.64    1.70
  -1  14 -14   19.59    2.44
   1 -14  14   20.94    2.61
  -1 -14 -14   16.96    2.01
  -1  14 -15   32.59    2.82
  -1 -14 -15   35.22    2.54
   1 -14  15   31.40    2.91
  -1  14 -16   21.97    2.57
  -1 -14 -16   24.17    2.29
   1 -14  16   19.76    2.60
  -1  14 -17  137.77    5.47
   1 -14  17  134.01    5.52
  -1 -14 -17  136.42    4.86
  -1 -14 -18   28.35    2.60
   1 -14  18   22.76    2.83
  -1  14 -18   23.05    2.79
  -1  14 -19  158.55    6.23
  -1 -14 -19  146.58    5.32
   1 -14  19  154.66    6.25
   1 -14  20   48.34    3.94
  -1  14 -20   46.61    3.83
  -1 -14 -20   50.16    3.37
  -1  14 -21   52.30    4.13
   1 -14  21   62.19    4.59
  -1 -14 -22  287.91    7.71
  -1  14 -22  287.23    8.55
   1 -14  22  307.76    9.20
  -1 -14 -23   -4.83    2.13
  -1  14 -23    0.39    2.11
   1 -14  23   -0.04    2.35
  -1  14 -24    9.86    2.66
   1 -14  24   10.50    2.81
  -1 -14 -24   10.49    2.39
  -1  14 -25   10.72    2.68
  -1 -14 -25   15.32    2.57
   1 -14  25   15.16    3.29
   1 -14  26   59.31    4.88
  -1  14 -26   56.81    4.53
  -1  14 -27   15.43    3.14
   1 -14  27   21.05    3.65
  -1 -14 -27   18.90    3.19
  -1 -14 -28    1.69    2.32
  -1  14 -28    1.54    2.55
   1 -14  28   -0.76    2.62
   1 -14  29    4.29    2.88
  -1  14 -29    3.03    2.79
  -1 -14 -29    3.06    2.51
   1 -14  30    6.21    3.02
  -1 -14 -30    8.46    2.97
  -1 -14 -30    9.71    2.85
  -1  14 -30    7.83    2.91
  -1 -14 -31    7.47    2.70
  -1 -14 -31    8.33    2.94
   1 -14  31   10.19    3.50
  -1  14 -31   15.44    3.38
   1 -14  32   -0.75    3.12
  -1 -14 -32    5.82    2.78
  -1 -14 -32    7.07    2.95
  -1  14 -32    6.43    3.19
   1 -14  33    8.34    3.41
  -1 -14 -33   10.09    3.09
  -1  14 -33   15.57    3.64
  -1 -14 -33   11.65    3.19
  -1  14 -34   98.52    6.64
  -1 -14 -34   91.13    5.94
  -1 -14 -34  105.21    6.53
  -1  14 -35    7.18    3.47
  -1 -14 -35   -0.40    2.87
  -1 -14 -35    6.73    3.12
  -1 -14 -36    4.07    3.33
  -1 -14 -36    4.04    3.28
  -1  14 -36    7.70    3.66
  -1 -14 -37    2.93    3.15
  -1  14 -37    4.11    3.28
  -1 -14 -37    2.86    3.26
  -1 -14 -38    0.57    3.29
  -1 -14 -38    2.00    3.32
  -1  14 -38    2.46    3.56
  -1 -14 -39    3.11    3.48
  -1 -14 -39    1.58    3.17
  -1 -14 -40    4.31    3.59
  -1 -14 -41    4.67    3.71
  -1 -14 -42   23.06    4.98
  -1 -14 -43    4.82    3.93
   1 -15 -42   -2.82    4.03
   1 -15 -41    3.17    4.00
   1 -15 -40    2.15    3.68
   1 -15 -39   16.73    4.67
   1 -15 -38   11.65    4.13
   1  15 -38    6.55    3.69
   1 -15 -37   13.54    3.93
   1 -15 -37   13.12    3.97
   1  15 -37   13.55    3.97
   1 -15 -36   -0.78    3.23
   1 -15 -36    2.36    3.34
   1  15 -36    2.16    3.33
   1 -15 -35    4.38    3.21
   1 -15 -35    7.81    3.59
   1  15 -35    5.79    3.25
   1  15 -34    0.47    3.05
   1 -15 -34   -0.57    2.98
   1 -15 -34    2.62    2.98
   1  15 -33   14.74    3.43
   1 -15 -33   15.90    3.39
  -1 -15  32    0.29    3.10
   1  15 -32    3.74    2.79
   1 -15 -32    5.58    3.03
   1 -15 -31   30.28    3.87
   1  15 -31   35.61    4.37
  -1 -15  31   22.79    3.97
  -1 -15  30   29.29    4.36
   1 -15 -30   27.65    3.79
   1  15 -30   31.27    4.10
   1 -15 -29   75.74    5.37
   1  15 -29   75.42    5.50
  -1 -15  29   73.05    5.75
   1  15 -28  114.46    6.43
   1 -15 -28  125.18    6.30
  -1 -15  28  112.34    6.67
   1 -15 -27   15.81    2.76
   1  15 -27   18.12    3.39
  -1 -15  27   21.20    3.63
   1  15 -26   11.89    2.97
  -1 -15  26    9.41    2.98
   1 -15 -26   11.36    2.74
  -1 -15  25    5.91    2.74
   1 -15 -25    4.31    2.48
   1  15 -25    1.10    2.31
  -1 -15  24   -0.55    2.42
   1  15 -24    0.13    2.28
   1 -15 -24    3.92    2.18
  -1 -15  23    6.07    2.50
   1  15 -23    5.46    2.44
   1 -15 -23    5.82    2.35
   1 -15 -22   82.39    4.73
  -1 -15  22   79.91    5.09
   1  15 -22   85.94    5.13
   1  15 -21  238.40    7.78
  -1 -15  21  254.44    8.29
   1 -15 -21  238.18    7.40
   1 -15 -20    2.35    1.77
  -1 -15  20    0.87    2.21
   1  15 -20    1.22    1.89
   1  15 -19   64.90    4.22
  -1 -15  19   61.08    4.31
   1 -15 -19   63.68    3.93
   1  15 -18   79.97    4.41
   1 -15 -18   82.48    4.30
  -1 -15  18   76.12    4.58
  -1 -15  17    1.15    1.82
   1  15 -17    5.25    2.02
   1 -15 -17   -1.02    1.71
  -1 -15  16   13.42    2.31
   1  15 -16   14.97    2.28
   1 -15 -16   17.24    2.25
   1 -15 -15  108.70    4.59
  -1 -15  15  105.96    4.89
   1  15 -15  106.46    4.76
  -1 -15  14  187.95    6.28
   1  15 -14  185.60    6.02
   1 -15 -14  192.60    5.87
  -1  15  13  449.35    8.80
   1 -15 -13  458.80    8.75
   1  15 -13  449.61    8.93
  -1 -15  13  455.16    9.22
  -1  15  12   13.85    2.02
  -1 -15  12   12.12    2.07
   1 -15 -12   14.72    1.99
   1  15 -12   13.90    1.94
  -1  15  11  122.90    4.65
  -1 -15  11  117.79    4.72
   1 -15 -11  121.25    4.51
   1  15 -11  116.46    4.48
  -1 -15  10  367.29    7.80
   1  15 -10  363.30    7.60
  -1  15  10  358.77    7.65
   1 -15 -10  365.90    7.35
  -1 -15   9    5.73    1.61
   1  15  -9    6.86    1.65
  -1  15   9    6.56    1.83
   1 -15  -9    2.78    1.42
  -1 -15   8   92.14    4.01
  -1  15   8   86.83    4.00
   1 -15  -8   94.06    3.87
   1  15  -8   93.54    3.88
   1  15  -7  199.02    5.39
  -1  15   7  186.57    5.42
   1 -15  -7  191.81    5.22
  -1 -15   7  194.14    5.41
  -1 -15   6   41.52    2.63
   1 -15  -6   49.69    2.72
   1  15  -6   47.69    2.76
  -1  15   6   50.12    2.90
   1 -15  -5 1014.23   11.45
   1  15  -5  983.54   11.32
  -1 -15   5 1031.87   11.56
  -1  15   5  976.67   11.71
   1  15  -4   21.62    1.97
  -1 -15   4   27.42    2.16
  -1  15   4   21.48    2.07
   1 -15  -4   22.61    2.15
   1  15  -3  522.15    7.99
  -1 -15   3  547.98    8.18
  -1  15   3  524.86    8.51
   1  15  -2    3.29    1.34
  -1  15   2    2.67    1.38
  -1 -15   2    2.70    1.23
   1 -15  -2    2.60    1.29
  -1  15   1   19.22    2.02
  -1 -15   1   23.79    1.99
   1  15  -1   19.87    1.97
   1 -15  -1   21.21    2.12
  -1 -15   0   58.29    2.76
   1  15   0   57.44    2.86
   1 -15   0   59.33    2.99
  -1  15   0   60.98    3.18
  -1  15  -1    5.23    1.51
   1  15   1    6.71    1.51
  -1 -15  -1    4.49    1.28
   1 -15   1    2.80    1.32
  -1 -15  -2  164.77    4.35
   1 -15   2  168.27    4.87
   1  15   2  161.35    4.42
  -1  15  -2  166.90    4.85
  -1  15  -3   20.89    2.10
   1 -15   3   25.69    2.29
  -1 -15  -3   24.23    1.98
   1  15   3   25.05    2.14
   1 -15   4  285.13    6.31
  -1  15  -4  271.90    6.22
   1  15   4  276.51    5.71
  -1 -15  -4  279.36    5.50
   1 -15   5  187.99    5.23
  -1  15  -5  188.34    5.28
   1  15   5  194.32    4.83
  -1 -15  -5  192.98    4.63
  -1 -15  -6   19.89    1.82
  -1  15  -6   18.73    2.10
   1  15   6   18.25    1.85
   1 -15   6   21.20    2.13
  -1 -15  -7   14.49    1.58
   1  15   7   16.74    1.83
   1 -15   7   15.40    1.93
  -1  15  -7   13.93    1.87
  -1 -15  -8   46.64    2.62
   1  15   8   41.99    2.58
  -1  15  -8   48.05    3.12
   1 -15   8   50.19    3.17
   1  15   9    1.84    1.22
   1 -15   9    3.84    1.58
  -1 -15  -9    5.14    1.37
  -1  15  -9    2.33    1.35
  -1  15 -10   47.05    3.02
   1 -15  10   51.89    3.21
  -1 -15 -10   43.98    2.60
  -1 -15 -11  105.38    3.83
   1  15  11  112.26    4.05
  -1  15 -11  103.01    4.35
  -1  15 -12   29.57    2.66
   1  15  12   26.00    2.28
   1 -15  12   28.19    2.66
  -1 -15 -12   27.75    2.26
   1 -15  13  355.77    8.34
  -1 -15 -13  339.39    6.89
  -1  15 -13  338.50    7.95
  -1 -15 -14   31.70    2.46
   1 -15  14   40.06    3.23
  -1  15 -14   35.32    2.92
  -1  15 -15   14.34    2.21
  -1 -15 -15   11.24    1.77
  -1  15 -16   14.68    2.37
  -1 -15 -16   17.50    2.08
   1 -15  16   13.31    2.41
  -1 -15 -17   89.81    4.08
  -1  15 -17   87.86    4.57
   1 -15  17   79.44    4.45
   1 -15  18    0.44    1.88
  -1  15 -18    1.24    1.82
  -1 -15 -18   -1.03    1.62
   1 -15  19  228.25    7.56
  -1 -15 -19  240.96    6.66
  -1  15 -19  233.12    7.44
  -1  15 -20    7.01    2.14
   1 -15  20   10.13    2.72
  -1 -15 -20    9.90    2.16
   1 -15  21   72.82    4.83
  -1  15 -21   71.35    4.54
  -1 -15 -21   64.13    3.92
   1 -15  22    3.96    2.44
  -1  15 -22    5.02    2.31
  -1 -15 -22    2.80    1.84
  -1 -15 -23   11.01    2.36
  -1  15 -23   15.32    2.95
   1 -15  23    7.37    2.76
  -1  15 -24   44.22    4.11
  -1 -15 -24   47.79    3.87
   1 -15  24   42.23    4.38
   1 -15  25   47.17    4.34
  -1 -15 -25   59.72    4.18
  -1  15 -25   61.90    4.73
  -1  15 -26   29.51    3.60
  -1 -15 -26   35.18    3.53
   1 -15  26   26.41    3.86
   1 -15  27   66.85    5.11
  -1  15 -27   67.14    4.95
  -1 -15 -27   68.88    4.62
  -1 -15 -28    5.43    2.48
  -1  15 -28    4.27    2.73
   1 -15  28    3.62    2.93
   1 -15  29    0.31    2.90
  -1  15 -29    1.93    2.71
  -1 -15 -29    3.94    2.39
   1 -15  30   17.90    3.77
  -1 -15 -30   25.90    3.56
  -1  15 -30   22.95    3.58
   1 -15  31    2.69    3.26
  -1  15 -31    5.78    3.04
  -1 -15 -31    0.96    2.63
  -1 -15 -31    8.08    2.93
  -1  15 -32   60.51    5.44
  -1 -15 -32   46.01    4.43
   1 -15  32   49.35    5.34
  -1 -15 -32   57.12    4.77
  -1  15 -33   96.14    6.66
  -1 -15 -33   98.16    6.18
   1 -15  33   80.14    6.55
  -1 -15 -33   83.70    5.84
  -1 -15 -34   -3.12    2.96
  -1 -15 -34    0.28    2.79
  -1  15 -34    2.70    3.02
  -1 -15 -35   50.72    5.15
  -1 -15 -35   50.97    5.02
  -1  15 -35   57.60    5.43
  -1 -15 -36    1.92    3.19
  -1 -15 -36   -1.67    2.94
  -1  15 -36    0.57    3.26
  -1 -15 -37    1.10    3.28
  -1 -15 -37   -3.49    3.29
  -1  15 -37    3.28    3.20
  -1 -15 -38    0.93    3.45
  -1  15 -38   -3.09    3.61
  -1 -15 -38    2.31    3.32
  -1 -15 -39   -5.75    3.54
  -1 -15 -39   12.60    4.26
  -1 -15 -40    0.52    3.63
  -1 -15 -41   11.67    4.35
  -1 -15 -42    4.67    4.47
  -1 -15 -43   17.33    4.59
   1 -16 -41    1.26    3.78
   1 -16 -40   -0.09    3.86
   1 -16 -39    7.85    4.21
   1 -16 -38    8.09    3.64
   1 -16 -37   -1.17    3.28
   1 -16 -37    0.07    3.29
   1  16 -37   -3.20    3.59
   1 -16 -36    1.65    3.41
   1 -16 -36   -2.54    3.46
   1  16 -36   -4.83    3.69
   1  16 -35    8.77    3.76
   1 -16 -35    5.77    3.35
   1 -16 -35    7.41    3.38
   1 -16 -34    7.77    3.50
   1  16 -34    9.61    3.57
   1  16 -33   -1.21    2.93
   1 -16 -33    3.63    2.81
   1 -16 -32   -1.38    2.78
   1  16 -32   -0.09    2.80
  -1 -16  32   -5.21    3.23
   1 -16 -31   -0.44    2.58
  -1 -16  31    0.93    3.02
   1  16 -31    1.49    2.62
   1 -16 -30   35.30    4.13
  -1 -16  30   30.45    4.53
   1  16 -30   37.56    4.46
  -1 -16  29   15.71    3.90
   1  16 -29    5.48    2.88
   1 -16 -29    8.65    2.85
   1  16 -28   41.34    4.40
  -1 -16  28   45.03    4.89
   1 -16 -28   46.16    4.29
  -1 -16  27    7.31    3.08
   1 -16 -27    4.73    2.70
   1  16 -27    0.58    2.42
  -1 -16  26    0.91    2.69
   1 -16 -26    0.95    2.44
   1  16 -26   -2.77    2.31
   1 -16 -25   -2.64    2.35
  -1 -16  25    1.34    2.48
   1  16 -25    1.59    2.20
  -1 -16  24   10.18    2.97
   1  16 -24    7.76    2.58
   1 -16 -24    3.08    2.18
   1 -16 -23   11.99    2.67
  -1 -16  23   10.85    2.92
   1  16 -23   14.05    2.85
  -1 -16  22  263.34    8.73
   1 -16 -22  274.79    8.17
   1  16 -22  272.18    8.54
  -1 -16  21   19.31    3.14
   1 -16 -21   13.35    2.49
   1  16 -21   22.36    3.32
   1 -16 -20  362.96    8.99
   1  16 -20  350.83    9.37
  -1 -16  20  346.31    9.66
   1  16 -19   24.29    3.08
  -1 -16  19   19.76    2.98
   1 -16 -19   24.72    2.86
   1 -16 -18    2.76    1.75
   1  16 -18    5.05    2.19
  -1 -16  18    1.18    1.97
  -1 -16  17   35.93    3.41
   1  16 -17   32.13    3.13
   1 -16 -17   29.37    2.80
   1 -16 -16    1.04    1.58
  -1 -16  16    2.15    1.89
   1  16 -16    3.65    1.94
  -1 -16  15   29.55    2.90
   1 -16 -15   25.03    2.44
   1  16 -15   29.16    2.81
  -1  16  14  261.84    7.08
   1  16 -14  255.36    7.14
  -1 -16  14  265.50    7.42
   1 -16 -14  264.88    7.05
   1  16 -13   22.90    2.53
   1 -16 -13   21.99    2.60
  -1  16  13   15.79    2.37
  -1 -16  13   19.10    2.63
   1 -16 -12 1075.30   13.25
  -1 -16  12 1060.76   14.05
   1  16 -12 1039.99   13.52
  -1  16  12 1063.33   13.56
   1 -16 -11  155.60    5.16
   1  16 -11  149.39    5.22
  -1  16  11  137.64    5.04
  -1  16  10   10.70    2.26
  -1 -16  10    8.52    2.04
   1  16 -10   10.00    2.15
   1 -16 -10    6.21    1.82
   1 -16  -9   87.01    3.90
  -1  16   9   82.05    3.90
  -1 -16   9   93.56    4.13
   1  16  -9   87.69    3.92
   1  16  -8   36.22    2.63
  -1  16   8   33.74    2.50
   1 -16  -8   35.86    2.62
  -1 -16   8   33.76    2.62
  -1 -16   7   13.43    2.10
   1 -16  -7   11.23    1.75
   1  16  -7   11.45    1.89
  -1  16   7   14.09    2.02
  -1  16   6  146.08    4.89
   1 -16  -6  158.92    4.94
  -1 -16   6  155.47    4.94
   1  16  -6  155.02    4.87
  -1  16   5   87.76    3.91
   1  16  -5   81.85    3.59
   1 -16  -5   86.48    3.73
  -1 -16   5   87.64    3.73
  -1 -16   4  603.23    8.97
  -1  16   4  624.97    9.65
   1  16  -4  623.58    9.17
   1 -16  -3   10.65    1.72
   1  16  -3   10.81    1.59
  -1 -16   3   14.46    1.83
  -1  16   3   11.85    1.89
  -1 -16   2  266.15    5.86
   1  16  -2  277.24    6.02
  -1  16   2  273.63    6.37
   1 -16  -2  283.00    6.22
   1 -16  -1    8.23    1.57
  -1  16   1    7.43    1.57
  -1 -16   1    8.21    1.48
   1  16  -1    8.60    1.60
   1  16   0  251.64    5.72
  -1 -16   0  258.37    5.62
  -1  16   0  251.51    6.09
   1 -16   0  249.94    5.97
   1  16   1  145.77    4.40
  -1  16  -1  143.42    4.72
  -1 -16  -1  147.94    4.29
   1 -16   1  148.15    4.69
  -1 -16  -2   40.16    2.49
   1 -16   2   43.56    2.85
  -1  16  -2   35.88    2.60
   1  16   2   36.66    2.43
  -1  16  -3   17.81    2.18
   1 -16   3   21.22    2.30
  -1 -16  -3   17.89    1.92
   1  16   3   20.43    2.15
   1 -16   4  612.83    9.52
  -1 -16  -4  618.15    8.50
  -1  16  -4  595.40    9.58
   1 -16   5   28.26    2.70
   1  16   5   22.26    2.33
  -1 -16  -5   27.83    2.23
  -1  16  -5   29.06    2.81
  -1  16  -6  294.52    6.89
  -1 -16  -6  302.96    6.10
   1  16   7   24.35    2.49
  -1 -16  -7   26.19    2.20
   1 -16   7   29.52    2.72
  -1  16  -7   31.23    2.81
   1 -16   8  139.05    5.01
  -1 -16  -8  147.58    4.41
  -1  16  -8  144.09    4.98
   1  16   8  157.96    4.62
  -1 -16  -9   63.14    3.01
  -1  16  -9   60.76    3.48
   1 -16   9   56.44    3.41
   1  16   9   58.95    2.99
  -1 -16 -10  178.85    4.92
   1  16  10  190.71    5.29
  -1  16 -10  176.96    5.72
  -1  16 -11    4.84    1.72
   1 -16  11    2.06    1.47
   1  16  11    3.39    1.38
  -1 -16 -11    4.60    1.54
  -1 -16 -12   40.03    2.67
   1 -16  12   42.75    3.18
  -1  16 -12   40.59    3.11
   1  16  12   43.92    2.86
  -1 -16 -13   25.99    2.33
   1 -16  13   26.65    2.74
   1  16  13   27.94    2.39
  -1  16 -13   23.71    2.57
  -1 -16 -14   49.20    3.00
   1 -16  14   47.31    3.57
  -1  16 -14   52.24    3.52
   1 -16  15    3.52    1.85
  -1 -16 -15   -0.36    1.34
  -1  16 -15    0.78    1.57
   1 -16  16  141.07    5.83
  -1 -16 -16  149.56    5.04
  -1  16 -16  140.99    5.62
  -1 -16 -17   18.87    2.23
  -1  16 -17   20.48    2.63
   1 -16  18  145.43    6.12
  -1 -16 -18  152.04    5.26
  -1  16 -18  139.38    5.86
   1 -16  19   22.81    3.03
  -1 -16 -19   23.05    2.59
  -1  16 -19   24.06    3.03
   1 -16  20   10.29    2.65
  -1  16 -20   10.69    2.67
  -1 -16 -20   11.82    2.22
  -1  16 -21    2.20    2.04
  -1 -16 -21    1.67    1.77
   1 -16  21    3.76    2.32
   1 -16  22   -1.77    2.30
  -1 -16 -22   -4.43    2.15
  -1  16 -22    0.01    2.03
  -1  16 -23   73.81    4.88
   1 -16  23   73.20    5.09
  -1 -16 -23   69.87    4.20
  -1  16 -24   92.01    5.51
  -1 -16 -24   85.46    4.78
   1 -16  24   84.42    5.52
  -1  16 -25   66.98    4.99
   1 -16  25   67.73    5.21
  -1 -16 -25   59.09    4.23
  -1  16 -26  157.57    7.25
   1 -16  26  151.70    7.27
  -1  16 -27   50.31    4.74
   1 -16  27   37.24    4.24
  -1 -16 -27   51.05    4.25
   1 -16  28   42.46    4.64
  -1  16 -28   51.01    4.75
  -1 -16 -28   49.71    4.20
  -1 -16 -29   15.63    3.01
  -1  16 -29   15.82    3.26
   1 -16  29   15.79    3.58
   1 -16  30    7.95    3.28
  -1  16 -30    3.71    2.96
  -1 -16 -30    1.52    2.40
  -1 -16 -31    0.69    2.54
   1 -16  31    4.19    3.21
  -1  16 -31   -0.36    2.86
  -1 -16 -31    5.36    2.76
  -1 -16 -32   -1.58    2.72
  -1 -16 -32    2.92    2.96
   1 -16  32    6.94    3.69
  -1  16 -32    1.26    2.97
  -1  16 -33    0.71    2.88
  -1 -16 -33   -1.50    2.88
  -1 -16 -34   13.39    3.49
  -1 -16 -34   23.14    3.98
  -1  16 -34   12.61    3.58
  -1 -16 -35   -3.63    3.19
  -1 -16 -35    0.67    2.95
  -1  16 -35   -6.89    3.85
  -1 -16 -36   11.35    3.80
  -1  16 -36    9.87    3.72
  -1 -16 -36    2.98    3.24
  -1  16 -37   -4.23    3.58
  -1 -16 -37    2.23    3.18
  -1 -16 -37    2.48    3.20
  -1 -16 -38    0.66    3.24
  -1 -16 -38    6.90    3.60
  -1 -16 -39    2.21    3.42
  -1 -16 -40    4.75    3.68
  -1 -16 -41   -5.00    3.74
  -1 -16 -42    5.27    3.92
   1 -17 -41    9.42    4.33
   1 -17 -40   -0.87    3.84
   1 -17 -39    0.41    3.71
   1 -17 -38    1.51    3.84
   1 -17 -37    5.57    3.70
   1 -17 -36    6.53    3.75
   1  17 -36   10.05    3.94
   1 -17 -36    6.14    3.68
   1 -17 -35   35.16    4.88
   1  17 -35   40.26    5.27
   1 -17 -35   37.65    5.07
   1 -17 -34   20.52    4.04
   1  17 -34   19.23    4.09
   1 -17 -33   22.71    3.97
   1  17 -33   25.87    4.01
   1  17 -32    0.51    3.02
   1 -17 -32    3.88    2.77
  -1 -17  31   10.01    3.53
   1 -17 -31    7.78    3.27
   1  17 -31    7.43    3.29
  -1 -17  30    4.77    3.18
   1  17 -30    2.11    2.74
   1 -17 -30    3.92    2.77
   1 -17 -29   36.83    4.16
  -1 -17  29   36.58    4.67
   1  17 -29   45.05    4.67
  -1 -17  28   11.40    3.52
   1  17 -28   15.71    3.44
   1 -17 -28   15.08    3.18
  -1 -17  27   27.06    4.04
   1 -17 -27   23.67    3.35
   1  17 -27   28.06    3.80
   1 -17 -26   11.16    2.73
  -1 -17  26    7.30    2.99
   1  17 -26   12.04    3.14
   1 -17 -25    1.85    2.34
   1  17 -25    4.33    2.56
  -1 -17  25    5.29    2.94
   1 -17 -24   24.21    3.31
   1  17 -24   17.86    3.09
  -1 -17  24   19.18    3.44
   1 -17 -23   54.34    4.16
   1  17 -23   56.12    4.51
  -1 -17  23   54.97    4.68
   1  17 -22   20.73    3.20
   1 -17 -22   26.07    3.16
  -1 -17  22   16.08    3.05
  -1 -17  21   46.43    4.14
   1  17 -21   52.77    4.07
   1 -17 -21   46.58    3.64
   1 -17 -20    8.29    2.38
  -1 -17  20   -0.16    2.37
   1  17 -20    4.42    2.24
   1  17 -19    7.24    2.60
   1 -17 -19    2.98    1.99
  -1 -17  19    7.27    2.52
  -1 -17  18    2.03    2.19
   1  17 -18    1.46    1.93
   1 -17 -18    2.24    1.96
   1  17 -17    1.43    1.84
  -1 -17  17   -0.70    2.03
   1 -17 -17    1.94    1.67
   1  17 -16   23.49    2.73
  -1 -17  16   23.71    2.83
   1 -17 -16   22.02    2.61
   1  17 -15   10.84    2.10
   1 -17 -15   13.51    2.30
  -1 -17  15   11.25    2.42
  -1  17  14   -2.36    1.91
   1 -17 -14   -1.78    1.70
  -1 -17  14   -0.76    1.85
   1  17 -14    2.27    1.72
   1 -17 -13  387.76    8.29
  -1  17  13  409.27    8.86
   1  17 -13  379.29    8.61
   1 -17 -12  139.21    5.07
  -1  17  12  141.55    5.30
  -1 -17  12  148.28    5.63
   1  17 -12  139.86    5.28
   1 -17 -11   40.44    2.99
  -1 -17  11   31.83    2.91
   1  17 -11   35.21    2.99
  -1  17  11   45.12    3.17
   1  17 -10   98.89    4.33
  -1  17  10   97.13    4.38
   1 -17 -10  104.17    4.29
  -1 -17  10  109.91    4.65
  -1  17   9  212.21    6.10
  -1 -17   9  227.58    6.36
   1 -17  -9  225.59    6.16
   1  17  -9  231.44    6.29
   1 -17  -8   12.37    2.02
  -1  17   8    8.99    1.88
   1  17  -8    9.92    1.99
  -1 -17   8   10.07    1.98
  -1  17   7   10.26    1.86
  -1 -17   7   13.63    1.95
   1  17  -7   11.87    1.84
   1 -17  -6   43.98    2.80
  -1  17   6   41.88    2.75
  -1 -17   6   45.72    2.92
   1  17  -6   41.21    2.73
   1  17  -5   23.25    2.24
   1 -17  -5   24.62    2.37
  -1  17   5   23.60    2.44
  -1 -17   5   23.47    2.35
   1  17  -4   51.58    2.98
  -1  17   4   50.04    3.06
  -1 -17   4   52.40    2.98
   1 -17  -4   53.56    3.00
   1  17  -3  144.19    4.69
   1 -17  -3  142.93    4.70
  -1  17   3  146.17    5.00
  -1 -17   3  144.12    4.62
   1 -17  -2  138.83    4.60
  -1  17   2  134.92    4.78
  -1 -17   2  147.65    4.58
   1  17  -2  145.69    4.60
  -1 -17   1    0.69    1.33
   1 -17  -1    3.79    1.48
   1  17  -1    3.30    1.39
  -1  17   1    1.23    1.47
   1  17   0  101.39    3.76
  -1  17   0   96.44    4.00
   1 -17   0  107.67    4.08
  -1 -17   0  109.39    3.88
  -1 -17  -1    3.90    1.47
  -1  17  -1    4.66    1.66
   1  17   1    5.19    1.52
   1 -17   1    3.91    1.48
   1 -17   2   92.10    3.98
   1  17   2  104.99    3.87
  -1  17  -2   97.44    4.13
  -1 -17  -2  100.24    3.65
  -1 -17  -3  100.24    3.72
  -1  17  -3  109.65    4.35
   1  17   3  102.57    3.94
   1 -17   3  107.27    4.18
  -1 -17  -4    5.45    1.48
  -1  17  -4    5.69    1.69
   1  17   4    4.38    1.51
   1 -17   4    6.03    1.78
   1 -17   5   16.96    2.39
  -1 -17  -5   19.87    2.12
   1  17   5   15.59    2.06
  -1  17  -5   16.42    2.22
   1  17   6   92.48    3.67
   1 -17   6   97.89    4.16
  -1  17  -6   95.47    4.17
  -1 -17  -6   92.76    3.54
   1  17   7    1.59    1.26
  -1 -17  -7   -0.19    1.17
  -1  17  -7    0.56    1.34
   1 -17   7    0.02    1.40
   1 -17   8   16.47    2.26
   1  17   8   16.70    2.05
  -1  17  -8   17.70    2.30
  -1 -17  -8   14.89    1.89
   1  17   9  248.64    6.06
  -1 -17  -9  233.24    5.72
   1 -17   9  226.53    6.49
  -1  17  -9  233.64    6.50
  -1 -17 -10   13.59    1.86
   1 -17  10   16.87    2.46
  -1  17 -10   14.10    2.16
   1  17  10   17.34    2.05
   1 -17  11    9.37    2.18
  -1 -17 -11    9.75    1.71
   1  17  11   11.86    1.90
  -1  17 -11    5.75    1.74
  -1  17 -12    6.99    1.88
   1 -17  12   12.64    2.33
   1  17  12    8.72    1.88
  -1 -17 -12    5.73    1.57
   1 -17  13  258.38    7.41
  -1  17 -13  261.85    7.26
   1  17  13  240.12    6.25
  -1 -17 -13  249.54    6.24
  -1 -17 -14   12.79    1.93
   1 -17  14   14.32    2.42
  -1  17 -14   13.86    2.27
  -1  17 -15   37.94    3.24
   1 -17  15   40.17    3.49
  -1 -17 -15   43.61    2.96
  -1  17 -16   67.10    4.28
   1 -17  16   66.08    4.42
  -1 -17 -16   60.31    3.51
  -1  17 -17  343.63    8.98
   1 -17  17  323.64    8.92
  -1 -17 -17  338.54    7.75
  -1 -17 -18  185.53    5.99
   1 -17  18  207.19    7.38
  -1  17 -18  192.00    6.97
  -1  17 -19  110.99    5.58
   1 -17  19  109.64    5.71
  -1 -17 -19  110.66    4.82
  -1  17 -20  103.18    5.49
  -1 -17 -20  102.22    4.78
   1 -17  20  108.28    5.70
  -1 -17 -21    1.36    2.03
   1 -17  21    2.30    2.28
  -1  17 -21   -4.34    2.49
  -1 -17 -22    7.11    2.29
  -1  17 -22    9.62    2.74
   1 -17  22    3.00    2.32
   1 -17  23    3.66    2.68
  -1 -17 -23    2.00    2.02
  -1  17 -23    1.74    2.41
  -1 -17 -24   26.11    3.11
  -1  17 -24   32.99    3.70
   1 -17  24   34.55    4.16
  -1  17 -25  281.87    9.34
   1 -17  25  269.60    9.62
  -1 -17 -25  293.50    8.50
   1 -17  26    2.17    2.77
  -1  17 -26    8.81    3.00
  -1 -17 -26    8.28    2.60
  -1 -17 -27   45.63    4.04
   1 -17  27   37.96    4.47
  -1  17 -27   49.48    4.64
  -1 -17 -28    4.07    2.37
   1 -17  28   -1.17    2.99
  -1  17 -28   -3.40    2.67
  -1 -17 -29    4.45    2.53
  -1  17 -29    2.95    2.70
   1 -17  29   10.02    3.45
  -1 -17 -30    4.73    2.65
   1 -17  30   12.67    3.51
  -1  17 -30    5.64    2.92
  -1  17 -31    7.81    3.41
  -1 -17 -31    1.98    2.65
   1 -17  31    5.65    3.32
  -1 -17 -32    9.78    3.09
  -1 -17 -32    8.16    3.03
  -1  17 -32    7.69    3.30
  -1  17 -33   22.48    4.04
  -1 -17 -33   28.55    3.88
  -1 -17 -33   21.41    3.77
  -1  17 -34    6.89    3.66
  -1 -17 -34    7.93    3.13
  -1 -17 -34    6.65    3.14
  -1 -17 -35   17.81    3.82
  -1  17 -35   17.87    4.23
  -1 -17 -35   17.53    3.83
  -1 -17 -36    0.69    3.19
  -1 -17 -36   -0.40    3.06
  -1  17 -36    6.17    3.72
  -1 -17 -37    1.37    3.28
  -1 -17 -37    4.51    3.39
  -1 -17 -38   12.22    3.96
  -1 -17 -38   10.99    3.82
  -1 -17 -39    0.21    3.32
  -1 -17 -40    5.97    3.68
  -1 -17 -41    1.32    3.64
  -1 -17 -42   -0.13    3.72
   1 -18 -41   16.13    4.85
   1 -18 -40    3.95    4.13
   1 -18 -39    5.79    3.98
   1 -18 -38   -1.44    3.60
   1 -18 -37    1.29    3.37
   1 -18 -36    1.58    3.33
   1  18 -36   -2.23    3.44
   1 -18 -36    1.53    3.42
   1  18 -35    0.23    3.40
   1 -18 -35    8.29    3.68
   1 -18 -34   30.70    4.60
   1  18 -34   35.66    4.79
   1  18 -33    5.49    3.33
   1 -18 -33    7.70    3.45
   1  18 -32    5.46    3.05
   1 -18 -32   15.38    3.69
   1  18 -31   34.36    4.56
   1 -18 -31   43.59    4.54
  -1 -18  30   29.76    4.46
   1 -18 -30   33.18    4.02
   1  18 -30   40.90    4.52
   1  18 -29   19.57    3.69
   1 -18 -29   24.78    3.80
  -1 -18  29   20.44    3.90
   1  18 -28    3.48    2.77
   1 -18 -28    4.47    2.80
  -1 -18  28    1.81    3.17
   1  18 -27   42.87    4.51
  -1 -18  27   40.38    4.52
   1 -18 -27   36.10    3.95
   1  18 -26   23.63    3.79
   1 -18 -26   17.82    3.07
  -1 -18  26   19.89    3.68
   1  18 -25    3.07    2.57
   1 -18 -25   -4.68    2.50
  -1 -18  25    3.41    2.88
  -1 -18  24   93.02    5.84
   1 -18 -24  102.92    5.52
   1  18 -24   89.86    5.53
  -1 -18  23    5.22    2.86
   1 -18 -23    3.43    2.27
   1  18 -23    9.82    2.75
   1 -18 -22   56.89    4.24
   1  18 -22   57.94    4.42
  -1 -18  22   54.83    4.74
   1 -18 -21    0.84    2.08
   1  18 -21    3.81    2.35
  -1 -18  21    1.95    2.48
   1  18 -20  182.62    7.07
  -1 -18  20  183.84    7.37
   1 -18 -20  179.44    6.58
  -1 -18  19   15.65    3.06
   1 -18 -19   10.65    2.34
   1  18 -19   18.79    3.06
  -1 -18  18   88.06    5.26
   1  18 -18   95.26    5.14
   1 -18 -18   92.13    4.87
  -1 -18  17    6.41    2.44
   1  18 -17    3.24    2.02
   1 -18 -17    2.58    1.93
  -1 -18  16    5.21    2.07
   1  18 -16    7.51    2.11
   1 -18 -16    6.71    2.06
  -1  18  15    1.91    1.86
  -1 -18  15   -0.42    1.89
   1  18 -15   -2.19    1.79
   1 -18 -15   -2.82    1.62
  -1 -18  14    3.47    2.01
   1  18 -14    4.64    1.80
  -1  18  14    5.81    1.88
   1 -18 -14    4.06    1.66
   1 -18 -13   11.15    2.13
  -1  18  13   13.37    2.28
  -1 -18  13   10.81    2.24
   1  18 -13    8.61    1.92
   1 -18 -12   33.58    2.74
  -1  18  12   36.17    2.93
   1  18 -12   32.63    2.87
  -1 -18  12   32.84    2.95
   1 -18 -11   59.06    3.44
  -1 -18  11   62.63    3.79
   1  18 -11   59.98    3.57
  -1  18  11   59.24    3.60
  -1  18  10   12.93    2.36
  -1 -18  10   10.97    2.11
   1  18 -10    9.43    1.95
   1 -18 -10   13.48    2.13
   1 -18  -9  125.11    4.72
   1  18  -9  121.54    4.77
  -1  18   9  120.80    4.76
  -1 -18   9  117.06    4.81
   1  18  -8  101.26    4.35
  -1  18   8   99.75    4.40
   1 -18  -8  106.36    4.39
  -1 -18   8  102.77    4.43
   1 -18  -7   50.24    3.21
  -1 -18   7   52.94    3.31
   1  18  -7   58.34    3.34
  -1  18   7   58.66    3.37
   1  18  -6    0.15    1.29
  -1 -18   6    0.22    1.48
   1 -18  -6   -0.66    1.35
  -1  18   6    1.63    1.36
   1 -18  -5   15.82    2.00
  -1  18   5   17.79    2.12
   1  18  -5   13.55    1.93
  -1 -18   5   18.62    2.14
   1 -18  -4   23.91    2.30
   1  18  -4   24.00    2.29
  -1  18   4   26.56    2.47
  -1 -18   4   18.56    2.12
  -1  18   3  212.16    6.09
   1 -18  -3  226.61    6.03
   1  18  -3  215.42    5.88
  -1 -18   3  217.53    5.80
   1  18  -2   69.87    3.67
   1 -18  -2   75.33    3.80
  -1  18   2   69.84    3.94
  -1 -18   2   71.36    3.51
  -1 -18   1  315.10    6.73
   1  18  -1  318.40    6.80
   1 -18  -1  320.82    7.08
  -1  18   1  320.68    7.25
   1 -18   0  103.74    4.23
  -1  18   0   94.66    4.14
  -1 -18   0   95.71    3.82
   1  18   0   93.15    3.86
  -1 -18  -1   94.60    3.75
  -1  18  -1   99.70    4.25
   1 -18   1   94.99    4.01
   1  18   1   99.13    3.95
   1  18   2   45.13    2.79
  -1 -18  -2   43.85    2.71
   1 -18   2   44.24    3.02
  -1  18  -2   41.55    3.06
  -1  18  -3   27.79    2.49
   1  18   3   30.54    2.41
  -1 -18  -3   25.48    2.17
   1 -18   3   27.18    2.49
   1  18   4   59.02    3.19
  -1 -18  -4   62.21    3.18
  -1  18  -4   63.26    3.52
   1 -18   4   63.47    3.57
   1  18   5    9.52    1.63
  -1 -18  -5    5.71    1.49
  -1  18  -5    6.37    1.70
   1 -18   5    8.87    1.91
   1 -18   6  108.68    4.54
  -1  18  -6  105.84    4.47
  -1 -18  -6  100.35    3.85
   1  18   6  103.12    4.00
  -1 -18  -7    1.00    1.33
   1  18   7    1.19    1.24
  -1  18  -7    2.33    1.63
   1 -18   7    1.97    1.54
   1  18   8   98.92    4.07
  -1  18  -8   95.03    4.36
   1 -18   8   86.22    4.25
  -1 -18  -8   87.15    3.66
  -1  18  -9   75.70    4.04
  -1 -18  -9   64.76    3.20
   1  18   9   59.75    3.26
   1 -18   9   73.00    4.00
  -1  18 -10   63.48    3.81
  -1 -18 -10   60.56    3.25
   1  18  10   64.80    3.50
   1 -18  10   61.38    3.74
  -1  18 -11    6.80    1.80
   1  18  11    5.95    1.55
  -1 -18 -11    7.40    1.68
   1 -18  11    6.39    1.94
   1  18  12   54.58    3.29
  -1  18 -12   46.90    3.29
   1 -18  12   49.81    3.60
  -1 -18 -12   43.84    2.94
   1  18  13  190.87    5.72
   1 -18  13  181.53    6.41
  -1  18 -13  189.54    6.39
  -1 -18 -13  193.27    5.64
  -1  18 -14    2.92    1.80
  -1 -18 -14    6.14    1.74
   1 -18  14    8.00    2.30
   1 -18  15  107.92    5.28
  -1  18 -15  110.68    5.17
  -1 -18 -15  117.11    4.68
   1 -18  16   22.86    3.08
  -1 -18 -16   23.26    2.48
  -1  18 -16   24.53    2.94
   1 -18  17   87.53    5.03
  -1  18 -17   88.07    4.95
  -1 -18 -17   88.54    4.28
   1 -18  18   23.65    3.28
  -1  18 -18   24.73    2.96
  -1 -18 -18   26.27    2.74
   1 -18  19   -0.75    2.35
  -1 -18 -19    0.88    1.73
  -1  18 -19    1.55    2.09
  -1  18 -20    5.04    2.43
  -1 -18 -20    7.44    2.17
   1 -18  20    7.43    2.65
  -1 -18 -21    8.44    2.39
   1 -18  21   10.09    2.94
  -1  18 -21    9.53    2.73
  -1 -18 -22   -1.13    1.94
   1 -18  22   -1.82    2.38
  -1  18 -22    2.54    2.32
   1 -18  23   11.13    3.10
  -1  18 -23   14.21    2.85
  -1 -18 -23   12.17    2.45
  -1 -18 -24   25.30    3.00
  -1  18 -24   25.55    3.50
   1 -18  24   21.61    3.59
  -1  18 -25   21.71    3.58
   1 -18  25   22.09    3.97
  -1 -18 -25   20.02    3.18
  -1 -18 -26  146.19    6.42
  -1  18 -26  149.11    7.28
   1 -18  26  144.57    7.57
   1 -18  27    1.89    2.98
  -1  18 -27    2.22    2.60
  -1 -18 -27    2.81    2.47
  -1  18 -28    5.65    2.75
  -1 -18 -28    1.26    2.40
   1 -18  28    8.20    3.19
   1 -18  29    1.51    3.06
  -1 -18 -29    7.54    2.63
  -1  18 -29    6.27    3.11
  -1 -18 -30   35.76    4.04
   1 -18  30   30.37    4.62
  -1  18 -30   32.89    4.44
  -1  18 -31   -1.03    2.78
  -1 -18 -31   -1.46    2.51
  -1 -18 -32    3.87    3.07
  -1  18 -32   -0.15    2.96
  -1 -18 -33    2.22    2.81
  -1  18 -33    6.44    3.32
  -1 -18 -33    0.74    2.78
  -1 -18 -34   10.13    3.29
  -1 -18 -34   17.75    3.79
  -1  18 -34   10.40    3.66
  -1 -18 -35   10.06    3.71
  -1  18 -35    3.82    3.38
  -1 -18 -35    9.42    3.68
  -1 -18 -36   -1.89    3.36
  -1  18 -36    4.60    3.61
  -1 -18 -36    5.72    3.57
  -1 -18 -37    8.60    3.71
  -1 -18 -37   13.53    4.10
  -1 -18 -38    5.77    3.59
  -1 -18 -38    5.29    3.78
  -1 -18 -39    2.41    3.61
  -1 -18 -40   -3.33    3.95
  -1 -18 -41    2.70    3.85
  -1 -18 -42   -4.54    3.89
   1 -19 -40    5.31    4.25
   1 -19 -39   -0.18    3.91
   1 -19 -38   17.21    4.67
   1 -19 -37    0.86    3.74
   1 -19 -36    3.61    3.65
   1 -19 -35   10.47    3.68
   1  19 -35    9.55    3.78
   1  19 -34    3.24    3.41
   1 -19 -34    2.15    3.09
   1 -19 -33   68.11    5.72
   1  19 -33   68.68    5.99
   1 -19 -32   34.58    4.44
   1  19 -32   32.88    4.59
   1  19 -31   -1.49    2.95
   1 -19 -31    2.84    2.76
  -1 -19  30    7.08    3.65
   1  19 -30    6.09    2.89
   1 -19 -30   14.18    3.50
   1 -19 -29   33.07    4.21
  -1 -19  29   25.83    4.45
   1  19 -29   22.96    3.95
  -1 -19  28    6.75    3.51
   1  19 -28    7.70    3.00
   1 -19 -28    9.08    2.94
   1  19 -27    6.70    2.88
  -1 -19  27   10.33    3.41
   1 -19 -27    9.42    2.94
   1  19 -26    0.13    2.49
   1 -19 -26   -4.74    2.64
  -1 -19  26   -1.24    3.04
  -1 -19  25   13.34    3.20
   1  19 -25   12.56    3.01
   1 -19 -25   15.95    2.99
   1  19 -24    6.01    2.72
   1 -19 -24    4.07    2.39
  -1 -19  23   11.88    3.26
   1  19 -23   14.15    3.01
   1 -19 -23   15.96    3.02
   1 -19 -22   55.31    4.19
  -1 -19  22   45.73    4.42
   1  19 -22   52.68    4.39
  -1 -19  21    1.97    2.42
   1 -19 -21    3.39    2.29
   1  19 -21    4.19    2.41
  -1 -19  20    3.92    2.45
   1 -19 -20    3.07    2.16
   1  19 -20    3.81    2.26
   1 -19 -19   35.67    3.45
   1  19 -19   43.59    3.92
  -1 -19  19   39.50    3.93
  -1 -19  18    0.20    2.19
   1 -19 -18    1.57    1.96
   1  19 -18    0.00    2.11
   1  19 -17  231.92    7.62
   1 -19 -17  229.10    7.17
  -1 -19  17  231.35    7.75
   1  19 -16   -0.11    1.98
  -1 -19  16   -0.83    2.19
   1 -19 -16   -0.72    1.81
  -1 -19  15   26.86    3.11
   1 -19 -15   27.23    2.90
   1  19 -15   24.33    2.86
  -1  19  15   24.55    2.91
  -1  19  14    7.61    1.95
   1 -19 -14    1.24    1.73
   1  19 -14    7.01    1.99
  -1 -19  14    5.10    2.16
   1 -19 -13   27.50    2.73
  -1  19  13   22.83    2.66
   1  19 -13   24.62    2.69
  -1 -19  13   20.97    2.84
  -1 -19  12   72.97    4.26
   1  19 -12   73.09    4.23
  -1  19  12   66.24    3.91
   1 -19 -12   67.89    3.86
   1  19 -11   26.34    2.82
  -1  19  11   31.96    2.95
   1 -19 -11   26.38    2.68
  -1 -19  11   28.17    2.97
  -1 -19  10   52.67    3.64
   1 -19 -10   47.22    3.23
  -1  19  10   51.68    3.45
   1  19 -10   52.69    3.43
   1 -19  -9  271.31    7.03
  -1  19   9  256.10    7.04
   1  19  -9  269.54    7.16
  -1 -19   9  263.95    7.23
   1  19  -8    1.59    1.48
  -1 -19   8   -0.11    1.69
   1 -19  -8    3.34    1.51
  -1  19   8    3.15    1.70
   1 -19  -7   82.67    3.95
  -1  19   7   73.96    3.93
  -1 -19   7   84.55    4.14
   1  19  -7   78.46    3.95
   1  19  -6    2.69    1.51
  -1 -19   6    2.17    1.61
   1 -19  -6    1.06    1.47
  -1  19   6    2.22    1.53
  -1  19   5   40.72    3.03
   1 -19  -5   43.69    2.97
   1  19  -5   41.58    2.93
  -1 -19   5   42.69    3.07
   1 -19  -4  128.80    4.72
   1  19  -4  132.92    4.78
  -1  19   4  133.91    4.91
  -1 -19   4  127.42    4.71
   1  19  -3   19.43    2.09
  -1 -19   3   18.32    2.15
  -1  19   3   18.08    2.33
   1 -19  -3   18.27    2.21
  -1  19   2   59.41    3.50
   1 -19  -2   59.60    3.42
  -1 -19   2   57.05    3.19
   1  19  -2   57.75    3.22
  -1  19   1    5.68    1.93
  -1 -19   1    5.99    1.60
   1 -19  -1    6.27    1.79
   1  19  -1    5.19    1.77
  -1  19   0   84.79    3.98
   1  19   0   85.75    3.80
   1 -19   0   80.99    3.88
  -1 -19   0   81.83    3.70
  -1 -19  -1   46.80    2.88
   1 -19   1   46.55    3.08
   1  19   1   51.98    3.05
  -1  19  -1   50.82    3.24
   1 -19   2   47.21    3.09
   1  19   2   43.91    2.90
  -1  19  -2   43.69    3.02
  -1 -19  -2   48.18    2.90
   1 -19   3   55.55    3.36
  -1  19  -3   56.27    3.42
  -1 -19  -3   55.02    3.03
   1  19   3   56.92    3.15
   1  19   4    2.24    1.44
  -1 -19  -4    1.91    1.35
  -1  19  -4    1.12    1.52
   1 -19   4    3.32    1.65
   1  19   5  177.38    5.34
   1 -19   5  183.34    5.86
  -1  19  -5  192.47    6.00
  -1 -19  -5  185.27    5.25
  -1 -19  -6  187.18    5.28
   1 -19   6  185.50    5.94
   1  19   6  182.11    5.38
  -1  19  -6  182.81    6.01
   1 -19   7   13.99    2.22
  -1  19  -7   19.84    2.57
   1  19   7   15.55    2.03
  -1 -19  -7   15.23    1.96
  -1 -19  -8  117.71    4.28
   1 -19   8  107.89    4.90
  -1  19  -8  116.02    4.90
   1  19   8  120.28    4.49
   1  19   9  111.97    4.43
   1 -19   9   99.80    4.68
  -1 -19  -9  102.71    4.09
  -1  19  -9  107.64    4.78
   1  19  10  174.07    5.54
  -1 -19 -10  177.86    5.32
  -1  19 -10  174.31    6.11
   1 -19  10  173.55    6.13
  -1  19 -11   84.93    4.46
   1 -19  11   84.47    4.52
  -1 -19 -11   81.47    3.82
   1  19  11   75.96    3.87
  -1 -19 -12   69.07    3.58
   1  19  12   74.96    3.90
   1 -19  12   62.09    4.13
  -1  19 -12   64.55    4.10
   1  19  13   29.27    2.72
  -1  19 -13   32.51    3.23
  -1 -19 -13   27.85    2.59
   1 -19  13   25.09    2.90
   1 -19  14   24.29    2.96
  -1  19 -14   26.09    2.91
   1  19  14   15.48    2.21
  -1 -19 -14   17.61    2.23
   1 -19  15    0.89    2.11
  -1  19 -15    2.99    2.00
  -1 -19 -15    2.14    1.61
  -1 -19 -16   42.16    3.13
   1 -19  16   42.39    3.87
  -1  19 -16   42.97    3.73
  -1  19 -17  137.16    5.98
   1 -19  17  139.46    6.34
  -1 -19 -17  126.41    5.04
   1 -19  18   -1.40    2.25
  -1 -19 -18    1.10    1.71
  -1  19 -18   -1.63    2.32
   1 -19  19   12.06    2.85
  -1 -19 -19   11.63    2.34
  -1  19 -19   11.12    2.58
  -1  19 -20   22.59    3.18
  -1 -19 -20   21.10    2.62
   1 -19  20   24.27    3.46
   1 -19  21  148.01    6.95
  -1  19 -21  155.26    6.82
  -1 -19 -21  166.57    6.18
  -1  19 -22   48.44    4.36
   1 -19  22   51.15    4.64
  -1 -19 -22   51.45    3.83
   1 -19  23   19.41    3.72
  -1  19 -23   10.00    2.92
  -1 -19 -23   17.86    2.91
  -1 -19 -24   12.60    2.63
   1 -19  24   15.74    3.51
  -1  19 -24   17.46    3.43
  -1 -19 -25    1.74    2.20
  -1  19 -25    5.47    2.87
   1 -19  25    4.35    2.96
   1 -19  26   13.26    3.46
  -1 -19 -26   12.72    2.77
  -1  19 -26    8.71    2.91
  -1  19 -27    4.22    2.60
   1 -19  27    9.87    3.40
  -1 -19 -27    9.46    2.73
  -1 -19 -28    7.02    2.78
  -1  19 -28    3.41    2.88
   1 -19  28    5.23    3.14
   1 -19  29   26.50    4.41
  -1  19 -29   23.52    3.70
  -1 -19 -29   22.25    3.46
  -1 -19 -30   -0.79    2.58
  -1  19 -30   -0.83    2.77
  -1 -19 -31    6.70    3.01
  -1  19 -31    6.95    3.43
  -1 -19 -32   10.75    3.18
  -1  19 -32   15.11    3.81
  -1  19 -33    0.57    2.99
  -1 -19 -33    3.87    2.87
  -1 -19 -33   -3.75    3.11
  -1 -19 -34    2.95    3.10
  -1 -19 -34    4.03    3.04
  -1  19 -34    3.05    3.33
  -1 -19 -35    4.63    3.21
  -1  19 -35    1.29    3.31
  -1 -19 -35   -0.08    3.21
  -1 -19 -36   16.38    4.18
  -1 -19 -36   19.87    4.05
  -1 -19 -37   13.97    4.09
  -1 -19 -37   17.18    4.22
  -1 -19 -38   -1.70    3.51
  -1 -19 -39   18.41    4.54
  -1 -19 -40    1.84    3.72
   1 -20 -40    5.85    4.56
   1 -20 -39   15.15    4.66
   1 -20 -38    1.96    3.87
   1 -20 -37    4.70    3.87
   1 -20 -35    2.92    3.32
   1 -20 -34   15.84    3.95
   1  20 -34   13.40    4.16
   1 -20 -33   -1.53    3.06
   1  20 -33    2.82    3.10
   1  20 -32    2.35    3.27
   1 -20 -32    0.57    3.00
   1  20 -31    8.46    3.31
   1 -20 -31    4.99    2.83
   1  20 -30   -4.00    3.11
   1 -20 -30    1.82    3.00
  -1 -20  29    5.59    3.42
   1  20 -29    6.98    3.26
   1 -20 -29    6.51    3.05
   1 -20 -28    9.47    2.94
   1  20 -28   13.08    3.40
  -1 -20  28   16.99    4.04
   1  20 -27    6.15    3.14
   1 -20 -27    9.37    2.97
  -1 -20  26  146.94    7.73
   1 -20 -26  145.04    6.90
   1  20 -26  151.70    7.45
   1  20 -25   72.32    5.26
  -1 -20  25   66.12    5.61
   1 -20 -25   58.74    4.65
   1 -20 -24   38.23    3.81
  -1 -20  24   38.23    4.44
   1  20 -24   41.82    4.42
   1 -20 -23   16.07    3.03
  -1 -20  23   20.81    3.67
   1  20 -23   20.36    3.40
   1  20 -22   13.96    2.84
   1 -20 -22   19.43    3.14
  -1 -20  22   18.90    3.47
   1 -20 -21   13.54    2.78
   1  20 -21   15.09    2.87
   1 -20 -20   11.45    2.53
  -1 -20  20   10.35    3.01
   1  20 -20    9.26    2.80
   1  20 -19   10.19    2.51
   1 -20 -19   15.26    2.68
  -1 -20  19   14.56    2.97
  -1 -20  18   59.33    4.52
   1  20 -18   68.36    4.65
   1 -20 -18   62.42    4.23
   1 -20 -17    7.60    2.27
   1  20 -17    6.64    2.59
  -1 -20  17    6.61    2.76
  -1 -20  16  304.19    9.00
   1  20 -16  299.55    8.64
   1 -20 -16  284.83    7.95
   1  20 -15   58.35    4.06
   1 -20 -15   58.77    3.87
  -1  20  15   63.84    4.23
  -1 -20  15   59.00    4.32
  -1 -20  14    7.03    2.41
   1  20 -14   12.24    2.55
  -1  20  14   10.30    2.47
   1 -20 -14    8.35    2.10
  -1  20  13    5.33    2.11
  -1 -20  13    6.92    2.34
   1 -20 -13    1.88    1.95
   1  20 -13    0.38    1.86
   1  20 -12   11.57    2.31
   1 -20 -12   10.79    2.13
  -1  20  12    8.91    2.05
  -1 -20  12   14.47    2.50
   1  20 -11    5.25    1.99
  -1  20  11    5.28    1.91
   1 -20 -11    0.65    1.61
  -1 -20  11    0.44    1.80
   1 -20 -10   95.68    4.45
  -1 -20  10   88.71    4.54
  -1  20  10   94.37    4.58
   1  20 -10   85.59    4.43
  -1  20   9   10.48    2.06
  -1 -20   9    9.10    2.14
   1  20  -9   11.23    2.20
   1 -20  -9   11.30    2.11
   1  20  -8  420.38    8.84
  -1 -20   8  410.93    8.89
  -1  20   8  436.94    9.22
   1  20  -7    8.95    1.91
   1 -20  -7    7.55    1.99
  -1 -20   7    9.95    2.08
  -1  20   7    9.40    2.12
   1  20  -6   16.41    2.21
   1 -20  -6   16.76    2.24
  -1 -20   6   18.07    2.35
  -1  20   6   16.00    2.14
  -1  20   5    8.50    1.86
  -1 -20   5    5.12    1.71
   1  20  -5    6.56    1.68
   1 -20  -5    4.55    1.78
   1  20  -4    1.63    1.37
  -1  20   4    0.22    1.58
   1 -20  -4    2.90    1.62
  -1 -20   4    1.09    1.45
  -1 -20   3    3.88    1.65
  -1  20   3    3.35    1.52
   1 -20  -3    4.60    1.74
   1  20  -3    0.08    1.47
   1 -20  -2   19.27    2.45
  -1  20   2   13.68    2.27
   1  20  -2   17.12    2.34
  -1 -20   2   14.97    2.20
  -1 -20   1   25.57    2.40
  -1  20   1   30.00    2.70
   1 -20  -1   25.46    2.45
   1  20  -1   29.07    2.56
  -1 -20   0  131.84    4.72
   1 -20   0  127.67    4.91
   1  20   0  135.00    4.82
  -1  20   0  125.17    4.99
   1 -20   1   20.43    2.38
  -1 -20  -1   20.00    2.21
  -1  20  -1   22.34    2.51
   1  20   1   23.22    2.37
  -1  20  -2    2.72    1.69
   1 -20   2    5.73    1.81
   1  20   2    6.03    1.81
  -1 -20  -2    4.51    1.57
   1  20   3    7.96    1.86
   1 -20   3   13.20    2.17
  -1  20  -3    9.00    2.03
  -1 -20  -3   10.78    1.88
  -1  20  -4   73.65    4.11
  -1 -20  -4   69.78    3.54
   1 -20   4   65.24    3.79
   1  20   4   71.92    3.71
   1  20   5    3.26    1.76
  -1  20  -5    1.60    1.68
  -1 -20  -5   -1.63    1.56
   1 -20   6   35.15    3.11
  -1  20  -6   31.65    2.93
  -1 -20  -6   32.30    2.60
   1  20   6   35.69    2.82
   1 -20   7   30.60    2.89
  -1  20  -7   30.01    2.77
  -1 -20  -7   32.59    2.52
   1  20   7   33.91    2.65
  -1 -20  -8    1.89    1.42
   1  20   8    3.15    1.63
  -1  20  -8    2.26    1.71
   1 -20   8    4.31    2.05
  -1  20  -9   55.54    3.68
   1  20   9   53.82    3.37
   1 -20   9   49.30    3.65
  -1 -20  -9   58.29    3.28
  -1 -20 -10    4.67    1.80
  -1  20 -10    5.31    2.21
   1  20  10    4.01    1.96
   1 -20  10    6.93    2.31
  -1  20 -11    3.16    1.87
  -1 -20 -11    5.39    1.80
   1 -20  11    3.10    2.01
   1  20  11    5.36    1.95
   1  20  12   19.37    2.41
  -1 -20 -12   11.11    2.18
  -1  20 -12   13.06    2.30
   1 -20  12   14.76    2.55
  -1  20 -13  120.77    5.51
   1  20  13  119.23    4.94
  -1 -20 -13  116.24    4.69
   1 -20  13  123.56    5.61
  -1  20 -14   40.74    3.73
  -1 -20 -14   44.19    3.21
   1  20  14   48.80    3.43
   1 -20  14   38.25    3.78
  -1  20 -15   97.86    5.10
  -1 -20 -15   90.65    4.30
   1 -20  15   93.88    5.18
   1 -20  16   11.93    2.75
  -1  20 -16   16.16    2.91
  -1 -20 -16   11.36    2.15
  -1 -20 -17   13.51    2.37
   1 -20  17   12.74    2.58
  -1  20 -17   12.93    2.57
  -1  20 -18    0.99    2.11
  -1 -20 -18    1.65    1.87
   1 -20  18    1.48    2.42
  -1  20 -19    2.58    2.42
  -1 -20 -19    3.21    1.97
   1 -20  19    1.56    2.36
  -1  20 -20   25.10    3.34
  -1 -20 -20   24.92    3.04
   1 -20  20   20.49    3.19
   1 -20  21    4.69    2.62
  -1 -20 -21   10.76    2.46
  -1  20 -21   12.62    2.97
  -1 -20 -22    5.56    2.27
  -1  20 -22    6.13    2.71
   1 -20  22    6.88    3.05
  -1  20 -23   -1.93    2.49
  -1 -20 -23   -0.06    2.27
  -1  20 -24    3.91    2.74
  -1 -20 -24    4.81    2.51
   1 -20  24    6.58    3.32
   1 -20  25   10.38    3.50
  -1  20 -25   11.15    3.20
  -1 -20 -25   11.11    2.71
  -1  20 -26   27.00    3.76
   1 -20  26   24.95    4.10
  -1 -20 -26   24.90    3.33
  -1 -20 -27    7.11    2.68
   1 -20  27    5.57    2.94
  -1  20 -27    6.67    3.07
  -1  20 -28   56.47    5.07
   1 -20  28   50.37    5.07
  -1 -20 -28   59.03    4.71
  -1 -20 -29    6.45    3.06
  -1  20 -29    5.47    3.15
  -1 -20 -30  119.77    6.44
  -1  20 -30  116.49    7.25
  -1  20 -31    3.36    3.25
  -1 -20 -31    3.90    2.78
  -1  20 -32   11.69    3.74
  -1 -20 -32   18.28    3.65
  -1  20 -33    6.76    3.47
  -1 -20 -33    5.31    3.25
  -1 -20 -34    4.14    3.33
  -1  20 -34    0.63    3.23
  -1 -20 -34    1.42    3.10
  -1 -20 -35    1.96    3.27
  -1 -20 -35    4.14    3.30
  -1 -20 -36    2.69    3.53
  -1 -20 -36    6.37    3.77
  -1 -20 -37    7.66    3.81
  -1 -20 -37    3.49    3.66
  -1 -20 -38   12.18    4.10
  -1 -20 -39    2.27    3.69
  -1 -20 -40    3.02    3.95
   1 -21 -39   -1.33    4.08
   1 -21 -38    4.57    4.01
   1 -21 -37    3.13    3.80
   1 -21 -34    9.93    3.90
   1 -21 -33   23.61    4.05
   1  21 -33   22.64    4.18
   1  21 -32    7.38    3.30
   1 -21 -32   13.87    3.78
   1 -21 -31   -2.46    2.88
   1  21 -31   -5.96    3.29
   1 -21 -30    4.28    3.11
   1  21 -30    4.28    3.08
   1 -21 -29   19.53    3.49
   1  21 -29   21.78    3.91
   1 -21 -28   -2.05    2.72
   1  21 -28    4.57    2.92
  -1 -21  28    1.62    3.16
   1 -21 -27    6.20    2.79
   1  21 -27    7.03    3.01
  -1 -21  27   10.18    3.36
  -1 -21  26   13.14    3.62
   1 -21 -26    7.20    2.69
   1  21 -26   10.27    3.03
  -1 -21  25   16.38    3.48
   1 -21 -25   23.55    3.64
   1  21 -25   27.61    3.89
   1  21 -24    6.99    3.19
   1 -21 -24    0.50    2.33
  -1 -21  24    6.25    2.93
   1  21 -23   17.31    3.35
  -1 -21  23   20.19    3.66
   1 -21 -23   23.21    3.46
  -1 -21  22    0.97    2.71
   1  21 -22    5.72    2.55
   1 -21 -22    4.41    2.47
   1 -21 -21    5.88    2.40
   1  21 -21    2.29    2.29
  -1 -21  21    7.19    2.83
   1 -21 -20   16.91    2.85
  -1 -21  20   12.51    3.05
   1  21 -20   19.22    3.10
   1 -21 -19   59.38    4.21
  -1 -21  19   51.22    4.55
   1  21 -19   55.73    4.39
   1 -21 -18   59.65    4.10
   1  21 -18   60.08    4.44
  -1 -21  18   59.18    4.63
   1 -21 -17   90.58    4.82
  -1 -21  17   86.66    5.30
   1  21 -17   80.60    4.89
   1 -21 -16   -0.66    2.03
  -1  21  16    2.81    2.06
  -1 -21  16   -0.99    2.41
   1  21 -16    1.75    2.30
  -1 -21  15  158.25    6.63
   1  21 -15  161.99    6.42
   1 -21 -15  171.52    6.31
  -1  21  15  178.78    6.56
  -1  21  14    4.34    2.00
   1  21 -14    2.32    1.98
   1 -21 -14    6.05    2.19
  -1 -21  13   15.39    2.87
   1  21 -13   17.66    2.66
   1 -21 -13   18.25    2.63
  -1  21  13   16.85    2.82
  -1  21  12    4.71    1.95
   1  21 -12    4.52    2.07
   1 -21 -12    4.42    2.01
  -1 -21  12    3.30    1.96
  -1  21  11    1.42    1.87
   1  21 -11   -0.74    1.77
  -1 -21  11    2.46    1.99
   1 -21 -11   -2.94    1.77
  -1 -21  10    2.66    1.87
  -1  21  10    9.05    2.20
   1 -21 -10    8.79    2.12
   1  21 -10   10.43    2.32
  -1  21   9  272.31    7.61
  -1 -21   9  263.22    7.56
   1 -21  -9  283.01    7.49
   1  21  -9  268.92    7.41
   1  21  -8  108.59    4.76
  -1 -21   8  116.42    5.11
  -1  21   8  100.09    4.71
   1 -21  -8  105.91    4.74
  -1 -21   7   51.47    3.66
   1 -21  -7   56.07    3.58
   1  21  -7   51.13    3.55
  -1  21   7   48.82    3.58
   1  21  -6    2.09    1.59
  -1 -21   6    1.77    1.97
  -1  21   6    3.72    1.84
   1 -21  -6    6.67    2.10
   1  21  -5   68.13    3.76
   1 -21  -5   63.65    3.68
  -1  21   5   68.37    3.93
  -1 -21   5   65.74    3.83
   1  21  -4   -0.11    1.56
  -1  21   4    1.40    1.61
  -1 -21   4    1.42    1.66
   1 -21  -4   -0.36    1.66
  -1 -21   3   18.15    2.31
   1  21  -3   18.06    2.18
  -1  21   3   16.51    2.25
   1 -21  -3   14.66    2.25
  -1 -21   2    8.30    2.01
   1 -21  -2    6.21    1.82
   1  21  -2   10.02    2.05
  -1  21   2    9.11    2.05
  -1  21   1   36.89    3.03
   1 -21  -1   35.34    2.98
   1  21  -1   36.64    2.93
  -1 -21   1   34.49    2.84
   1  21   0   20.95    2.38
  -1 -21   0   18.06    2.18
  -1  21   0   18.83    2.48
   1 -21   0   17.29    2.37
   1  21   1   57.86    3.37
  -1  21  -1   56.32    3.58
   1 -21   1   54.55    3.46
  -1 -21  -1   61.20    3.46
  -1  21  -2   25.01    2.68
   1  21   2   24.81    2.48
  -1 -21  -2   22.92    2.39
   1 -21   2   26.55    2.77
   1 -21   3    5.76    1.90
  -1  21  -3    4.73    1.89
   1  21   3    4.87    1.84
  -1 -21  -3    4.47    1.62
   1 -21   4    4.76    2.06
  -1 -21  -4    1.20    1.51
  -1  21  -4    4.56    1.80
   1  21   4    7.22    1.76
   1  21   5   47.17    3.12
   1 -21   5   47.99    3.40
  -1 -21  -5   43.58    2.98
  -1  21  -5   47.96    3.42
   1 -21   6   27.91    2.78
  -1  21  -6   32.88    3.05
  -1 -21  -6   29.72    2.58
   1  21   6   32.12    2.75
  -1  21  -7    6.71    2.16
  -1 -21  -7    2.95    1.68
   1 -21   7    6.93    2.22
   1  21   7    5.46    1.81
   1 -21   8   16.44    2.55
  -1  21  -8   17.35    2.57
   1  21   8   17.27    2.33
  -1 -21  -8   16.25    2.08
   1  21   9    4.15    1.69
  -1  21  -9   -1.46    1.90
  -1 -21  -9   -0.42    1.60
   1 -21   9    3.64    1.96
  -1 -21 -10    2.27    1.74
   1 -21  10    4.14    2.10
   1  21  10    3.49    1.74
  -1  21 -10    1.76    1.76
   1 -21  11   46.21    3.83
   1  21  11   50.78    3.55
  -1  21 -11   48.25    3.81
  -1 -21 -11   42.66    3.18
  -1 -21 -12   45.95    3.21
   1  21  12   45.70    3.43
  -1  21 -12   51.97    3.93
   1 -21  12   48.62    3.87
   1  21  13  109.58    4.97
   1 -21  13  102.34    5.41
  -1 -21 -13   99.08    4.54
  -1  21 -13   96.10    5.14
   1 -21  14    6.36    2.38
  -1  21 -14    7.58    2.59
   1  21  14    4.37    1.83
  -1 -21 -14    7.26    2.02
  -1 -21 -15   40.09    3.21
  -1  21 -15   37.48    3.69
   1 -21  15   31.74    3.41
  -1 -21 -16   -0.15    1.89
   1 -21  16    0.00    2.20
  -1  21 -16    3.64    2.25
  -1  21 -17   27.24    3.46
  -1 -21 -17   21.59    2.76
   1 -21  17   28.60    3.63
   1 -21  18   39.19    4.11
  -1  21 -18   37.68    3.82
  -1 -21 -18   40.17    3.44
  -1 -21 -19   22.06    2.87
  -1  21 -19   25.60    3.52
   1 -21  19   22.10    3.45
  -1 -21 -20    0.16    2.03
  -1  21 -20   -1.71    2.30
   1 -21  21   77.11    5.49
  -1 -21 -21   82.61    4.69
  -1  21 -21   80.91    5.39
  -1  21 -22   -0.16    2.56
   1 -21  22    3.48    2.93
  -1 -21 -22   -0.14    2.17
   1 -21  23  150.05    7.54
  -1 -21 -23  155.01    6.48
  -1  21 -23  156.75    7.51
   1 -21  24   -3.00    2.83
  -1  21 -24    2.72    2.77
  -1 -21 -24    0.99    2.34
   1 -21  25   25.60    4.19
  -1 -21 -25   20.36    3.25
  -1  21 -25   17.24    3.48
  -1  21 -26    3.30    2.79
   1 -21  26    1.83    2.99
  -1  21 -27    9.83    3.29
  -1 -21 -27    9.03    2.89
   1 -21  27    3.61    3.26
  -1  21 -28   26.00    3.99
  -1 -21 -28   22.96    3.53
  -1  21 -29    5.05    3.01
  -1 -21 -29    8.56    3.00
  -1 -21 -30    0.99    2.66
  -1  21 -30    3.81    3.13
  -1  21 -31   21.02    4.23
  -1 -21 -31    7.49    3.14
  -1  21 -32    4.54    3.33
  -1 -21 -32    2.41    2.89
  -1 -21 -33    6.00    3.28
  -1  21 -33    2.44    3.47
  -1 -21 -34   10.60    3.67
  -1 -21 -34    7.96    3.43
  -1 -21 -35   10.57    3.90
  -1 -21 -35    6.15    3.67
  -1 -21 -36   11.92    3.85
  -1 -21 -37   14.94    4.19
  -1 -21 -38    4.42    3.62
  -1 -21 -39   26.77    5.00
  -1 -21 -40    6.21    4.09
   1 -22 -38    6.65    4.45
   1 -22 -33    8.62    3.76
   1  22 -32    3.92    3.61
   1 -22 -32    5.87    3.33
   1 -22 -31    2.66    3.15
   1  22 -31    6.30    3.48
   1  22 -30   25.06    4.39
   1 -22 -30   20.87    3.93
   1  22 -29    8.76    3.42
   1 -22 -29    1.58    2.79
   1 -22 -28    9.91    3.29
   1  22 -28    7.42    3.19
  -1 -22  27   -4.72    3.53
   1  22 -27    1.69    2.84
   1 -22 -27    3.99    2.82
  -1 -22  26    8.84    3.28
   1 -22 -26   14.16    3.21
   1  22 -26   15.96    3.39
   1 -22 -25   -2.09    2.64
  -1 -22  25    7.60    3.38
   1  22 -25    3.91    2.72
   1  22 -24   68.64    5.30
   1 -22 -24   68.00    4.89
  -1 -22  24   68.12    5.50
   1  22 -23    4.97    2.66
  -1 -22  23   -3.78    3.08
   1 -22 -23   -1.13    2.46
   1 -22 -22   30.79    3.68
  -1 -22  22   31.42    4.22
   1  22 -22   25.92    3.47
   1  22 -21   -2.69    2.54
   1 -22 -21   -6.90    2.50
  -1 -22  20   35.68    4.20
   1  22 -20   32.93    3.87
   1 -22 -20   31.84    3.62
   1  22 -19   18.52    3.18
   1 -22 -19   19.70    3.10
  -1 -22  19   15.35    3.23
   1  22 -18   17.14    3.10
  -1 -22  18   14.26    2.91
   1 -22 -18   16.95    2.88
   1 -22 -17   37.74    3.60
   1  22 -17   41.09    4.00
  -1 -22  17   35.54    4.07
  -1  22  16  271.54    8.43
  -1 -22  16  255.62    8.65
   1 -22 -16  263.46    7.94
   1  22 -16  273.97    8.60
  -1 -22  15   16.32    3.14
  -1  22  15   18.50    2.87
   1  22 -15   18.88    3.05
   1 -22 -15   17.61    2.84
   1 -22 -14    8.22    2.28
  -1  22  14   13.36    2.63
   1  22 -14    5.47    2.35
  -1 -22  14    6.94    2.57
   1 -22 -13   26.18    3.02
   1  22 -13   30.58    3.30
  -1 -22  13   28.61    3.37
  -1  22  13   23.25    2.89
  -1 -22  12   -0.32    2.18
  -1  22  12    3.35    1.97
   1 -22 -12    5.05    1.91
   1  22 -12    6.05    2.28
   1  22 -11    7.82    2.22
  -1  22  11    8.16    2.26
   1 -22 -11    1.27    1.79
  -1 -22  11    4.52    2.20
  -1  22  10   34.81    3.23
   1 -22 -10   34.78    3.16
  -1 -22  10   37.97    3.37
   1  22 -10   32.37    3.09
   1  22  -9    2.45    2.01
  -1  22   9    3.03    2.09
   1 -22  -9    3.34    1.99
  -1 -22   9    6.04    2.23
  -1  22   8  145.06    5.80
  -1 -22   8  135.91    5.61
   1  22  -8  150.20    5.82
   1 -22  -8  138.30    5.45
   1  22  -7   79.28    4.30
  -1 -22   7   76.70    4.30
  -1  22   7   75.41    4.22
   1 -22  -7   77.00    4.17
   1 -22  -6    5.73    1.97
  -1  22   6    3.13    1.84
  -1 -22   6    2.33    1.81
   1  22  -6    4.68    2.06
  -1  22   5    8.21    2.29
   1 -22  -5    7.21    2.18
   1  22  -5    9.51    2.20
  -1 -22   5    9.60    2.18
   1  22  -4   29.80    2.87
  -1  22   4   29.49    2.92
  -1 -22   4   31.82    2.98
   1 -22  -4   33.03    2.96
   1  22  -3   47.97    3.33
  -1 -22   3   42.50    3.24
   1 -22  -3   43.48    3.29
  -1  22   3   48.47    3.45
  -1  22   2   29.28    2.89
   1  22  -2   30.81    2.80
  -1 -22   2   25.31    2.70
   1 -22  -2   27.47    2.83
  -1  22   1   26.21    2.87
   1  22  -1   27.68    2.71
   1 -22  -1   25.32    2.73
  -1 -22   1   24.87    2.62
   1 -22   0  108.88    4.80
  -1  22   0  107.16    4.99
  -1 -22   0  104.40    4.54
   1  22   0  115.12    4.77
  -1  22  -1   35.97    3.16
  -1 -22  -1   40.96    3.08
   1  22   1   39.05    2.96
   1 -22   1   41.78    3.39
   1  22   2    5.95    1.86
  -1 -22  -2    6.29    1.90
   1 -22   2    2.53    1.69
  -1  22  -2    4.11    1.82
  -1 -22  -3    6.04    1.90
   1  22   3    4.23    1.80
   1 -22   3    1.89    1.84
  -1  22  -3    2.33    1.91
   1 -22   4  144.39    5.74
  -1 -22  -4  138.11    5.06
   1  22   4  141.18    5.31
  -1  22  -4  139.71    5.70
  -1 -22  -5   28.20    2.73
   1 -22   5   25.80    3.05
  -1  22  -5   24.91    3.00
   1  22   5   21.90    2.62
  -1 -22  -6  161.24    5.47
   1 -22   6  149.55    5.94
   1  22   6  154.68    5.50
  -1  22  -6  159.56    6.12
  -1 -22  -7   12.47    2.28
  -1  22  -7    9.69    2.26
   1  22   7   10.17    2.08
   1 -22   7   11.69    2.55
   1 -22   8   17.58    2.80
  -1 -22  -8   12.69    2.10
   1  22   8   15.54    2.33
  -1  22  -8   15.45    2.57
   1  22   9   62.21    3.85
  -1  22  -9   59.18    4.01
  -1 -22  -9   64.33    3.62
   1 -22   9   66.12    4.40
   1  22  10    4.96    2.01
  -1 -22 -10    2.82    1.74
  -1  22 -10    4.46    2.00
   1 -22  10    4.79    2.15
  -1 -22 -11    8.70    2.07
  -1  22 -11   10.66    2.59
   1  22  11   10.83    2.29
   1 -22  11    9.90    2.57
  -1  22 -12   88.79    4.95
   1  22  12   86.01    4.27
   1 -22  12   77.04    4.76
  -1 -22 -12   86.99    4.28
  -1  22 -13    4.47    2.00
  -1 -22 -13    6.67    1.90
   1 -22  13    9.22    2.57
   1  22  13   11.45    2.32
  -1 -22 -14   45.46    3.43
   1  22  14   50.57    3.64
  -1  22 -14   43.82    3.79
   1 -22  14   41.53    3.88
   1  22  15    5.90    2.09
  -1  22 -15    8.35    2.48
  -1 -22 -15   10.57    2.23
   1 -22  15    5.71    2.51
  -1  22 -16    2.31    2.15
  -1 -22 -16   -0.47    1.86
   1 -22  16    0.73    2.37
   1 -22  17   38.92    4.25
  -1 -22 -17   39.83    3.50
  -1  22 -17   42.77    4.14
  -1  22 -18   12.41    3.28
  -1 -22 -18   12.00    2.61
   1 -22  18    8.87    3.12
  -1 -22 -19    7.85    2.42
  -1  22 -19   11.46    2.95
   1 -22  19    6.08    2.87
  -1  22 -20   41.98    4.22
   1 -22  20   36.17    4.08
  -1 -22 -20   45.64    3.74
  -1 -22 -21   44.76    3.80
  -1  22 -21   42.27    4.30
   1 -22  21   44.38    4.57
  -1 -22 -22   58.61    4.15
  -1  22 -22   51.92    4.52
   1 -22  23    2.11    3.04
  -1 -22 -23    4.76    2.38
  -1  22 -23    7.05    2.88
  -1  22 -24   15.33    3.42
  -1 -22 -24   14.54    2.94
   1 -22  24   14.87    3.76
  -1  22 -25    3.13    2.76
   1 -22  25    2.16    3.08
  -1 -22 -25    2.18    2.39
  -1 -22 -26    0.28    2.38
  -1  22 -26    2.20    2.77
   1 -22  26    0.59    3.16
  -1  22 -27   10.57    3.29
  -1 -22 -27    6.65    2.79
  -1  22 -28   10.63    3.58
  -1 -22 -28   16.81    3.39
  -1 -22 -29   15.69    3.41
  -1  22 -29   21.09    4.07
  -1  22 -30   30.57    4.56
  -1 -22 -30   24.85    3.88
  -1  22 -31    2.54    3.17
  -1 -22 -31   -4.33    3.06
  -1  22 -32    2.64    3.25
  -1 -22 -32    6.73    3.22
  -1 -22 -33   -3.88    3.15
  -1 -22 -34   -3.94    3.42
  -1 -22 -35    7.82    3.69
  -1 -22 -35    1.01    3.42
  -1 -22 -36    1.58    3.62
  -1 -22 -37    2.08    3.66
  -1 -22 -38    0.65    4.00
  -1 -22 -39   -3.07    4.06
   1 -23 -38    4.13    4.05
   1 -23 -33    1.76    3.38
   1 -23 -32    4.93    3.63
   1  23 -31    2.50    3.20
   1 -23 -31    1.39    3.30
   1  23 -30    0.25    3.02
   1 -23 -30    2.85    3.15
   1  23 -29   10.27    3.72
   1 -23 -29    8.58    3.27
   1  23 -28   14.45    3.72
   1 -23 -28   15.57    3.46
   1 -23 -27    5.61    3.02
   1  23 -27    8.53    3.34
   1  23 -26   18.65    3.66
   1 -23 -26   23.41    3.65
  -1 -23  26   19.28    4.25
   1  23 -25   10.70    3.17
  -1 -23  25   11.36    3.43
   1 -23 -25   10.31    2.99
  -1 -23  24    9.51    3.68
   1 -23 -24    4.20    2.65
  -1 -23  23    0.39    2.99
   1  23 -23    0.38    2.50
   1 -23 -23    2.29    2.63
  -1 -23  22    2.57    2.78
   1 -23 -22    4.03    2.51
   1  23 -22    4.29    2.60
   1  23 -21    8.22    2.93
  -1 -23  21    8.25    3.16
   1 -23 -21    5.09    2.69
   1  23 -20   -3.54    2.48
  -1 -23  20   -1.63    2.76
   1 -23 -20    4.09    2.37
  -1 -23  19   -2.04    2.73
   1  23 -19    2.90    2.39
   1 -23 -19    1.06    2.14
   1  23 -18   13.62    2.95
  -1 -23  18    6.13    2.62
   1 -23 -18   12.51    2.70
   1  23 -17   55.65    4.32
  -1 -23  17   47.71    4.47
   1 -23 -17   60.60    4.24
   1  23 -16    3.10    2.44
  -1 -23  16    1.97    2.49
  -1  23  16   -3.15    2.28
   1 -23 -16    3.34    2.27
   1  23 -15   36.86    3.77
  -1 -23  15   45.55    4.27
  -1  23  15   32.33    3.54
   1 -23 -15   42.55    3.72
   1  23 -14   13.62    2.70
  -1  23  14   15.57    2.91
   1 -23 -14   17.86    2.79
  -1 -23  14   21.10    3.27
  -1 -23  13   59.92    4.69
   1  23 -13   60.14    4.41
   1 -23 -13   57.59    4.06
  -1  23  13   57.84    4.21
   1 -23 -12   47.71    3.76
   1  23 -12   44.76    3.84
  -1 -23  12   44.24    3.99
  -1  23  12   47.23    3.95
  -1 -23  11   10.32    2.63
   1 -23 -11    6.40    2.29
   1  23 -11    7.07    2.27
  -1  23  11    4.59    2.37
   1  23 -10    4.41    2.14
  -1  23  10    6.44    2.27
  -1 -23  10    4.15    2.19
   1 -23 -10    0.42    1.89
  -1  23   9   55.84    3.96
   1 -23  -9   57.28    3.90
   1  23  -9   55.39    3.97
  -1 -23   9   50.28    3.89
  -1  23   8   10.70    2.56
   1  23  -8   10.71    2.40
  -1 -23   8    6.78    2.29
   1 -23  -8    8.50    2.19
   1  23  -7  186.88    6.62
   1 -23  -7  175.70    6.25
  -1 -23   7  179.65    6.54
  -1  23   7  191.93    6.81
  -1 -23   6  223.14    7.11
   1 -23  -6  210.82    6.77
   1  23  -6  206.64    6.69
  -1  23   5   32.48    3.23
   1  23  -5   28.85    3.17
   1 -23  -5   26.30    2.91
  -1 -23   5   23.42    2.89
   1  23  -4   71.54    4.18
   1 -23  -4   76.74    4.29
  -1  23   4   67.00    4.18
  -1 -23   4   71.46    4.24
   1 -23  -3   17.97    2.56
  -1  23   3   20.39    2.78
   1  23  -3   18.90    2.66
  -1 -23   3   15.68    2.45
   1  23  -2   21.66    2.69
  -1 -23   2   22.57    2.75
  -1  23   2   19.31    2.57
   1 -23  -2   18.99    2.66
  -1  23   1   11.13    2.31
   1 -23  -1   10.89    2.27
  -1 -23   1   13.02    2.43
   1  23  -1   11.80    2.27
  -1  23   0   44.64    3.53
   1  23   0   43.30    3.27
  -1 -23   0   40.93    3.17
   1 -23   0   45.57    3.53
   1  23   1   63.53    3.68
   1 -23   1   61.83    3.91
  -1  23  -1   69.42    4.23
  -1 -23  -1   65.17    3.73
   1 -23   2   21.49    2.71
  -1  23  -2   24.08    2.84
  -1 -23  -2   18.49    2.41
   1  23   2   18.32    2.43
   1  23   3   30.34    2.86
   1 -23   3   26.38    2.91
  -1  23  -3   32.80    3.23
  -1 -23  -3   30.25    2.84
  -1 -23  -4  123.74    4.96
   1  23   4  115.46    4.90
   1 -23   4  116.07    5.36
  -1  23  -4  124.88    5.54
  -1  23  -5   58.65    4.10
  -1 -23  -5   55.11    3.49
   1 -23   5   52.92    3.83
   1  23   5   53.44    3.57
   1  23   6   22.79    2.50
  -1  23  -6   21.64    2.80
   1 -23   6   23.83    2.99
  -1 -23  -6   24.89    2.73
   1 -23   7   -1.40    2.18
  -1 -23  -7   -1.74    1.78
   1  23   7   -1.63    1.81
  -1  23  -7   -0.26    1.90
  -1  23  -8    4.22    2.13
  -1 -23  -8    2.77    1.82
   1 -23   8    4.04    2.35
   1  23   8    3.36    1.85
   1  23   9   40.87    3.37
   1 -23   9   33.14    3.41
  -1  23  -9   34.08    3.49
  -1 -23  -9   36.83    3.01
   1 -23  10   68.69    4.58
   1  23  10   72.35    4.28
  -1  23 -10   65.39    4.35
  -1 -23 -10   60.29    3.76
   1 -23  11   48.06    4.07
  -1  23 -11   49.95    4.13
  -1 -23 -11   43.88    3.29
   1  23  11   54.09    3.83
  -1  23 -12   58.72    4.32
   1  23  12   57.76    3.93
  -1 -23 -12   59.85    3.75
   1 -23  12   54.82    4.27
   1  23  13  138.05    5.66
  -1 -23 -13  132.40    5.28
  -1  23 -13  128.60    6.10
   1 -23  13  119.90    6.13
   1 -23  14   12.08    2.98
   1  23  14   11.87    2.52
  -1 -23 -14   12.72    2.47
  -1  23 -14   10.15    2.62
  -1  23 -15   29.82    3.44
  -1 -23 -15   31.40    3.15
   1 -23  15   26.96    3.59
   1  23  15   34.41    3.36
  -1  23 -16   14.94    2.89
  -1 -23 -16   14.37    2.59
   1 -23  16   11.40    2.87
   1 -23  17   14.91    3.26
  -1 -23 -17   19.36    2.84
  -1  23 -17   18.33    3.08
  -1 -23 -18   20.30    2.91
  -1  23 -18   15.63    3.02
   1 -23  18   20.47    3.51
   1 -23  19    7.59    2.86
  -1 -23 -19    4.65    2.32
  -1  23 -19    2.90    2.40
  -1  23 -20    2.16    2.46
   1 -23  20    3.38    2.92
  -1 -23 -20    2.56    2.18
  -1  23 -21   67.92    5.25
   1 -23  21   58.12    5.24
  -1 -23 -21   63.26    4.32
  -1 -23 -22   12.04    2.66
  -1  23 -22   14.58    3.44
   1 -23  22   16.17    3.69
   1 -23  23   22.13    4.06
  -1  23 -23   17.16    3.33
  -1 -23 -23   13.70    2.89
  -1 -23 -24    6.18    2.55
  -1  23 -24    5.60    3.10
   1 -23  24    5.74    3.44
   1 -23  25   -2.15    3.08
  -1  23 -25    6.44    3.15
  -1 -23 -25    2.25    2.55
  -1  23 -26    0.44    2.69
  -1 -23 -26   -3.68    2.63
  -1 -23 -27    2.72    2.61
  -1  23 -27    7.65    3.35
  -1  23 -28    7.36    3.47
  -1 -23 -28   15.42    3.33
  -1  23 -29    3.64    3.27
  -1 -23 -29    2.60    2.91
  -1 -23 -30   -3.03    2.83
  -1  23 -30    2.70    3.22
  -1  23 -31    7.13    3.60
  -1 -23 -31    3.53    2.90
  -1 -23 -32    2.29    3.20
  -1 -23 -33    4.86    3.13
  -1 -23 -34    4.77    3.41
  -1 -23 -35    5.09    3.73
  -1 -23 -36    2.54    3.68
  -1 -23 -37    0.34    3.88
  -1 -23 -38   -1.74    3.82
   1 -24 -32    6.15    3.72
   1  24 -31    8.73    4.00
   1 -24 -31    4.47    3.45
   1 -24 -30   20.30    4.20
   1  24 -30   20.11    4.29
   1 -24 -29   16.84    4.00
   1  24 -29   16.18    4.02
   1 -24 -28   39.30    4.69
   1  24 -28   35.70    4.86
   1 -24 -27    7.32    3.10
   1  24 -27    6.77    3.44
   1 -24 -26   -0.64    2.67
   1  24 -26    8.67    3.26
  -1 -24  25    0.36    3.31
   1 -24 -25    4.09    2.77
   1  24 -25   -1.67    2.71
   1 -24 -24    5.71    2.74
   1  24 -24    0.51    2.81
  -1 -24  24   -3.21    3.19
   1  24 -23    1.69    2.48
  -1 -24  23    4.02    3.23
   1 -24 -23    2.34    2.51
   1  24 -22    8.98    3.07
  -1 -24  22    3.85    3.18
   1 -24 -22    4.69    2.57
   1 -24 -21    6.71    2.74
   1  24 -21    7.54    2.95
  -1 -24  21    1.65    2.78
   1  24 -20   28.86    3.96
  -1 -24  20   29.76    4.19
   1 -24 -20   32.64    3.82
  -1 -24  19   18.41    3.58
   1  24 -19   23.46    3.61
   1 -24 -19   24.13    3.32
   1 -24 -18   -1.42    2.20
  -1 -24  18    2.99    2.82
   1  24 -18    4.39    2.56
  -1 -24  17    5.94    2.72
   1  24 -17    1.16    2.24
   1 -24 -17    3.33    2.49
   1 -24 -16    2.73    2.17
  -1  24  16    2.64    2.11
   1  24 -16    1.08    2.13
  -1 -24  16    3.53    2.46
  -1 -24  15   20.71    3.36
  -1  24  15   17.60    2.93
   1  24 -15   17.07    3.01
   1 -24 -15   15.33    2.72
  -1  24  14   20.10    3.12
   1  24 -14   23.49    3.38
   1 -24 -14   22.72    3.15
  -1 -24  14   16.68    3.34
   1 -24 -13    1.28    2.06
   1  24 -13   10.10    2.77
  -1  24  13    3.90    2.27
  -1 -24  13    7.69    2.77
   1 -24 -12   45.76    3.75
  -1 -24  12   43.22    3.93
  -1  24  12   48.58    3.89
   1  24 -12   40.91    3.75
  -1 -24  11    2.76    2.36
  -1  24  11    3.25    2.29
   1  24 -11    9.48    2.63
   1 -24 -11    4.00    2.07
   1  24 -10    6.47    2.27
  -1  24  10    7.23    2.45
  -1 -24  10    4.26    2.38
   1 -24 -10    9.33    2.46
  -1 -24   9    2.00    2.09
   1 -24  -9    3.93    2.29
   1  24  -9    2.77    2.08
  -1  24   9    1.86    1.94
   1 -24  -8   10.93    2.48
  -1  24   8    8.22    2.41
   1  24  -8   12.62    2.75
  -1 -24   8    7.69    2.41
   1 -24  -7  178.67    6.45
  -1  24   7  174.81    6.68
  -1 -24   7  184.81    6.75
   1  24  -7  174.13    6.53
  -1 -24   6  108.06    5.34
   1 -24  -6  101.70    5.11
  -1  24   6   98.65    5.21
   1  24  -6  104.29    5.22
   1  24  -5   86.53    4.63
  -1  24   5   86.99    4.80
   1 -24  -5   85.86    4.67
  -1 -24   5   86.66    4.74
  -1  24   4   11.51    2.45
   1  24  -4   15.50    2.62
  -1 -24   4   11.07    2.45
   1 -24  -4   12.01    2.52
   1 -24  -3   32.53    3.19
   1  24  -3   40.77    3.44
  -1 -24   3   32.29    3.15
  -1  24   3   40.10    3.46
  -1  24   2    8.08    2.42
   1  24  -2    9.19    2.37
   1 -24  -2   11.59    2.63
  -1 -24   2    8.08    2.33
   1 -24  -1   16.04    2.67
  -1  24   1   15.21    2.70
  -1 -24   1   16.97    2.55
   1  24  -1   14.11    2.31
   1 -24   0  151.48    5.95
   1  24   0  154.15    5.88
  -1 -24   0  150.44    5.71
  -1  24   0  160.05    6.24
  -1 -24  -1  169.14    5.98
   1 -24   1  176.30    6.45
   1  24   1  173.36    6.14
  -1  24  -1  165.18    6.40
  -1 -24  -2   15.30    2.54
   1 -24   2   10.30    2.45
   1  24   2   15.37    2.61
  -1  24  -2   16.26    2.82
   1  24   3   80.67    4.32
   1 -24   3   90.37    4.84
  -1 -24  -3   88.87    4.43
  -1  24  -3   89.54    4.84
   1 -24   4   65.24    4.35
  -1 -24  -4   69.80    4.00
   1  24   4   72.85    4.22
  -1  24  -4   75.11    4.58
  -1  24  -5    5.11    2.33
   1  24   5    5.28    2.02
  -1 -24  -5    9.95    2.21
   1 -24   5    2.97    2.08
   1  24   6    6.31    2.04
  -1 -24  -6    3.06    1.94
   1 -24   6    5.34    2.29
  -1  24  -6    1.88    1.95
  -1  24  -7   -0.92    2.07
  -1 -24  -7    1.22    1.79
   1 -24   7    0.65    2.08
   1  24   7    2.39    2.19
  -1 -24  -8   35.41    3.06
   1  24   8   36.57    3.25
   1 -24   8   38.92    3.72
  -1  24  -8   43.36    3.80
  -1 -24  -9   52.40    3.60
  -1  24  -9   58.39    4.31
   1 -24   9   65.54    4.50
   1  24   9   57.69    3.82
   1 -24  10   68.62    4.78
  -1 -24 -10   60.57    3.81
  -1  24 -10   67.21    4.58
   1  24  10   64.43    4.06
  -1  24 -11   18.66    2.93
  -1 -24 -11   20.59    2.63
   1  24  11   14.76    2.62
   1 -24  11   14.28    2.91
   1 -24  12   14.99    3.00
  -1 -24 -12   12.70    2.39
   1  24  12   17.29    2.75
  -1  24 -12   16.63    2.95
   1  24  13    6.67    2.30
   1 -24  13   11.79    2.83
  -1 -24 -13    6.63    2.17
   1 -24  14   23.86    3.57
  -1 -24 -14   19.76    2.78
  -1  24 -14   18.56    3.01
   1  24  14   20.20    2.81
   1  24  15   11.45    2.58
  -1  24 -15   11.74    2.67
  -1 -24 -15    8.68    2.23
   1 -24  15   10.98    2.81
  -1  24 -16   -0.69    2.37
   1 -24  16    1.85    2.45
  -1 -24 -16   -0.63    1.98
  -1 -24 -17   -0.31    2.13
   1 -24  17   -3.74    2.79
  -1  24 -17    2.77    2.28
  -1  24 -18   15.52    3.04
  -1 -24 -18   19.57    2.90
   1 -24  18   16.96    3.35
   1 -24  19   10.53    3.24
  -1  24 -19   14.30    3.20
  -1 -24 -19   16.26    2.76
  -1 -24 -20    5.27    2.37
  -1  24 -20    5.61    2.78
   1 -24  20   10.04    3.19
  -1 -24 -21    8.84    2.58
   1 -24  21    6.37    2.99
  -1  24 -21   10.24    3.12
  -1 -24 -22    9.03    2.54
  -1  24 -22    5.41    2.91
   1 -24  22    5.56    3.03
  -1 -24 -23    8.17    2.63
  -1  24 -23    6.68    3.20
  -1 -24 -24   13.93    2.91
   1 -24  24    7.54    3.29
  -1  24 -24   15.90    3.50
  -1 -24 -25   -0.44    2.48
  -1  24 -25    1.17    2.72
  -1 -24 -26    6.32    2.91
  -1  24 -26   13.99    3.55
  -1 -24 -27    5.89    2.95
  -1  24 -27   13.20    3.50
  -1  24 -28    4.53    2.91
  -1 -24 -28   -3.42    2.70
  -1  24 -29   -1.82    3.05
  -1 -24 -29   -4.08    2.92
  -1  24 -30    7.25    3.47
  -1 -24 -30   14.73    3.60
  -1 -24 -31    8.24    3.42
  -1 -24 -32    7.33    3.39
  -1 -24 -33    6.26    3.61
  -1 -24 -35    3.62    3.81
  -1 -24 -36   16.43    4.66
   1 -25 -31   -0.08    3.18
   1 -25 -30    0.70    3.12
   1  25 -29   19.34    4.23
   1 -25 -29   18.42    3.94
   1  25 -28    2.24    3.33
   1 -25 -28    2.17    3.01
   1 -25 -27    5.91    3.33
   1  25 -27    0.90    3.05
   1 -25 -26   19.90    3.87
   1  25 -26   14.86    3.72
   1 -25 -25    7.60    3.37
   1  25 -25    5.93    3.15
   1  25 -24    2.73    2.84
   1 -25 -24    0.42    2.71
   1  25 -23    9.92    3.15
   1 -25 -23   11.29    3.05
  -1 -25  23   19.68    3.87
   1  25 -22    1.12    2.70
  -1 -25  22    3.25    3.11
   1 -25 -22    2.21    2.67
  -1 -25  21   41.29    4.72
   1  25 -21   37.06    4.18
   1 -25 -21   38.26    4.01
  -1 -25  20    6.24    3.07
   1 -25 -20    3.02    2.43
   1  25 -20    7.78    2.90
  -1 -25  19    2.23    2.78
   1 -25 -19    2.95    2.51
   1  25 -19    5.97    2.86
   1 -25 -18   15.94    3.08
   1  25 -18   15.68    3.28
  -1 -25  18    9.24    2.98
   1 -25 -17    5.35    2.63
  -1 -25  17    1.87    2.58
   1  25 -17    6.18    2.73
  -1  25  16    1.73    2.35
   1  25 -16    3.96    2.64
   1 -25 -16    0.79    2.16
  -1 -25  16    4.71    2.77
  -1 -25  15    8.28    3.01
  -1  25  15    5.56    2.56
   1  25 -15   10.67    2.85
   1 -25 -15    9.92    2.64
  -1 -25  14    4.73    3.03
  -1  25  14    3.96    2.37
   1  25 -14    6.21    2.70
   1 -25 -14    3.06    2.37
   1 -25 -13  108.58    5.47
   1  25 -13  111.67    5.81
  -1  25  13  114.49    5.80
  -1 -25  13  106.27    6.00
   1 -25 -12   11.42    2.78
  -1 -25  12   19.85    3.35
   1  25 -12   15.32    3.02
  -1  25  12   13.12    3.01
  -1  25  11   66.43    4.78
  -1 -25  11   62.27    4.65
   1  25 -11   63.70    4.59
   1 -25 -11   61.70    4.28
  -1  25  10    2.21    2.26
  -1 -25  10    0.35    2.25
   1 -25 -10    4.75    2.45
   1  25 -10    0.56    2.10
  -1 -25   9   -0.77    2.23
  -1  25   9    0.21    2.16
   1  25  -9   -1.40    2.23
   1 -25  -9   -2.00    2.14
   1  25  -8   40.35    3.69
  -1  25   8   47.22    3.92
   1 -25  -8   39.27    3.43
  -1  25   7    3.33    2.44
   1 -25  -7    3.41    2.22
  -1 -25   7    1.41    2.29
   1  25  -7    7.33    2.61
   1 -25  -6   25.34    3.00
  -1 -25   6   23.24    3.09
  -1  25   6   31.86    3.41
   1  25  -6   27.22    3.23
  -1  25   5   10.95    2.67
  -1 -25   5    6.89    2.32
   1 -25  -5   11.13    2.44
   1  25  -5   11.83    2.50
  -1  25   4    5.77    2.34
   1 -25  -4    4.12    2.20
  -1 -25   4    4.08    2.37
   1  25  -4    6.83    2.39
   1 -25  -3  117.94    5.41
  -1  25   3  116.51    5.56
   1  25  -3  117.56    5.42
  -1 -25   3  108.63    5.15
  -1  25   2    3.05    2.04
   1  25  -2    2.59    1.91
   1 -25  -2    4.67    2.11
  -1 -25   2   -2.27    2.03
   1  25  -1   12.92    2.59
  -1 -25   1   13.20    2.45
  -1  25   1   14.06    2.65
   1 -25  -1   16.38    2.75
  -1 -25   0   21.87    2.71
   1  25   0   25.57    2.87
   1 -25   0   22.77    2.92
  -1  25   0   29.07    3.32
   1 -25   1    3.49    2.20
  -1 -25  -1    3.47    2.04
   1  25   1    2.59    2.07
  -1  25  -1    1.69    2.18
  -1  25  -2  159.48    6.44
  -1 -25  -2  158.03    5.95
   1  25   2  164.04    6.19
   1 -25   2  152.64    6.24
  -1  25  -3    6.30    2.42
  -1 -25  -3    6.27    2.20
   1 -25   3    3.37    2.21
   1  25   3    3.92    1.99
   1  25   4    5.08    1.88
   1 -25   4    6.30    2.54
  -1  25  -4    7.68    2.52
  -1 -25  -4    4.64    2.09
  -1 -25  -5    0.89    1.81
   1 -25   5    0.07    2.08
   1  25   5   -0.08    1.87
  -1  25  -5    2.66    2.10
   1 -25   6    0.05    2.29
  -1 -25  -6    6.84    2.27
  -1  25  -6    7.59    2.54
   1  25   6    3.97    1.92
   1 -25   7    7.14    2.63
  -1  25  -7    7.16    2.42
  -1 -25  -7    0.83    1.87
   1  25   7    6.53    2.17
  -1 -25  -8    4.18    2.17
   1  25   8    2.78    1.88
   1 -25   8   -1.16    2.43
  -1  25  -8    7.81    2.61
   1 -25   9   50.91    4.23
  -1 -25  -9   55.91    3.83
   1  25   9   54.73    3.90
  -1  25  -9   53.40    4.25
   1  25  10   85.80    4.72
   1 -25  10   85.15    5.24
  -1  25 -10   88.12    5.20
  -1 -25 -10   85.96    4.52
  -1 -25 -11    5.66    2.24
  -1  25 -11    8.70    2.85
   1  25  11    8.21    2.54
   1 -25  11    3.57    2.38
  -1 -25 -12   31.29    3.10
   1 -25  12   24.49    3.43
  -1  25 -12   30.50    3.61
   1  25  12   31.23    3.25
  -1 -25 -13   13.84    2.44
   1  25  13   18.77    2.89
   1 -25  13   15.27    3.06
  -1  25 -13   17.25    3.14
   1  25  14    1.94    2.03
  -1  25 -14    4.45    2.43
   1 -25  14   -0.18    2.57
  -1 -25 -14   -1.35    2.02
   1  25  15   17.10    2.88
  -1 -25 -15   15.40    2.67
   1 -25  15    9.41    2.67
  -1  25 -15   18.33    3.37
  -1  25 -16    5.96    2.68
  -1 -25 -16    3.94    2.26
   1 -25  16    6.25    3.05
   1 -25  17  113.16    6.69
  -1  25 -17  128.40    6.55
  -1 -25 -17  125.36    5.69
  -1  25 -18    2.72    2.80
  -1 -25 -18   -1.41    2.18
   1 -25  18    2.14    2.96
  -1 -25 -19    1.05    2.18
   1 -25  19    2.40    2.85
  -1  25 -19    3.92    2.75
   1 -25  20    4.73    3.18
  -1 -25 -20    9.92    2.74
  -1  25 -20   10.75    3.00
  -1 -25 -21    0.86    2.39
   1 -25  21    3.72    3.07
  -1  25 -21    4.85    2.91
   1 -25  22    4.77    3.24
  -1  25 -22    1.06    2.71
  -1 -25 -22    4.48    2.46
  -1 -25 -23    7.93    2.72
   1 -25  23   10.39    3.44
  -1  25 -23    9.77    3.19
  -1  25 -24    2.53    2.94
  -1 -25 -24    1.18    2.40
  -1 -25 -25   65.70    4.87
  -1  25 -25   60.00    5.53
  -1 -25 -26   -1.04    2.58
  -1  25 -26    6.11    3.51
  -1 -25 -27   23.08    3.65
  -1  25 -27   27.69    4.52
  -1  25 -28    0.65    3.14
  -1 -25 -28    5.79    3.17
  -1 -25 -29    4.84    3.12
  -1  25 -29    6.40    3.81
  -1 -25 -30    3.25    3.18
  -1 -25 -31   -0.11    3.08
  -1 -25 -32    7.37    3.43
   1 -26 -30   24.94    4.42
   1 -26 -29    9.53    3.78
   1 -26 -28   17.41    3.98
   1  26 -28   26.32    4.50
   1 -26 -27   -0.25    3.00
   1  26 -27    8.98    3.51
   1  26 -26   -5.31    3.68
   1 -26 -26    7.23    3.30
   1  26 -25   -0.18    3.00
   1 -26 -25   -2.32    3.14
   1 -26 -24   -0.04    2.72
   1  26 -24    4.40    3.31
   1 -26 -23   -1.46    2.68
   1  26 -23    1.31    2.91
   1 -26 -22   11.16    3.10
  -1 -26  22   13.30    3.77
   1  26 -22    9.93    3.18
   1 -26 -21    1.61    2.59
  -1 -26  21    0.08    3.15
   1  26 -21    2.37    2.70
   1  26 -20   77.47    5.69
  -1 -26  20   67.33    5.79
   1 -26 -20   69.06    5.00
  -1 -26  19    1.33    2.77
   1  26 -19    4.32    2.83
   1 -26 -19    0.26    2.43
  -1 -26  18   -0.24    2.76
   1 -26 -18    2.76    2.64
   1  26 -18    7.53    2.91
   1  26 -17   21.42    3.48
  -1 -26  17   21.58    3.66
   1 -26 -17   22.21    3.33
   1  26 -16    9.20    2.72
  -1 -26  16    4.82    2.92
  -1  26  16    4.55    2.42
   1 -26 -16    8.49    2.74
   1  26 -15   -2.41    2.35
   1 -26 -15    2.20    2.32
  -1 -26  15    1.79    2.63
  -1  26  15   -1.31    2.20
   1  26 -14   28.27    3.59
   1 -26 -14   26.98    3.53
  -1  26  14   20.65    3.23
  -1 -26  14   28.92    3.96
   1 -26 -13    5.22    2.31
  -1 -26  13    3.07    2.71
   1  26 -13   -0.64    2.24
  -1  26  13    4.93    2.49
   1  26 -12   31.03    3.58
  -1 -26  12   31.33    3.70
  -1  26  12   32.72    3.54
   1 -26 -12   30.53    3.33
   1 -26 -11   15.86    2.96
  -1  26  11   11.26    2.83
   1  26 -11   11.42    2.74
  -1 -26  11   12.03    2.99
  -1 -26  10    5.97    2.68
   1 -26 -10    7.34    2.54
   1  26 -10    6.79    2.43
  -1  26  10    8.78    2.60
  -1 -26   9   14.61    2.88
  -1  26   9   13.26    2.79
   1 -26  -9    9.57    2.55
   1  26  -9   16.86    2.83
   1  26  -8    0.85    2.08
  -1  26   8   -0.10    2.03
   1 -26  -8    4.47    2.26
  -1 -26   8    2.66    2.23
   1 -26  -7    6.90    2.45
  -1  26   7   12.29    2.77
  -1 -26   7    5.58    2.38
   1  26  -7    5.88    2.34
   1  26  -6   21.86    3.24
   1 -26  -6   22.55    3.22
  -1 -26   6   22.07    3.18
  -1  26   6   17.83    2.91
  -1 -26   5   13.09    2.84
   1 -26  -5   13.87    2.74
   1  26  -5   10.09    2.67
  -1  26   5   12.19    2.77
   1 -26  -4  155.42    6.29
  -1 -26   4  149.35    6.26
   1  26  -4  152.87    6.31
  -1  26   4  155.22    6.63
   1  26  -3    9.51    2.56
   1 -26  -3    5.78    2.34
  -1  26   3    4.90    2.35
  -1 -26   3    5.99    2.43
   1  26  -2   13.69    2.62
  -1 -26   2    9.40    2.38
  -1  26   2   12.31    2.71
   1 -26  -2   10.23    2.48
   1  26  -1    0.24    1.96
  -1  26   1    0.61    1.98
   1 -26  -1    2.48    2.24
  -1 -26   1    3.38    2.18
  -1  26   0    8.59    2.55
  -1 -26   0    3.68    2.20
   1  26   0    7.94    2.37
   1 -26   0    7.38    2.25
   1 -26   1    0.77    2.10
  -1 -26  -1    1.73    1.97
   1  26   1    3.33    2.05
  -1  26  -1    5.18    2.43
   1  26   2   26.26    3.02
   1 -26   2   29.86    3.37
  -1 -26  -2   33.22    3.24
  -1  26  -2   26.66    3.31
  -1  26  -3    2.60    2.24
   1  26   3    1.88    1.91
   1 -26   3    1.59    2.15
  -1 -26  -3    0.85    2.05
  -1 -26  -4   16.47    2.55
  -1  26  -4   22.16    3.16
   1  26   4   19.24    2.82
   1 -26   4   22.83    3.12
   1  26   5    1.72    2.15
  -1 -26  -5    0.77    1.94
   1 -26   5    1.40    2.23
  -1  26  -5   -2.26    2.32
  -1  26  -6   13.16    2.84
   1 -26   6   14.25    2.84
  -1 -26  -6   20.51    2.90
   1  26   6   14.59    2.60
   1  26   7    0.38    1.89
  -1  26  -7    5.24    2.61
   1 -26   7    1.93    2.30
  -1 -26  -7    0.32    1.95
   1  26   8   76.77    4.52
   1 -26   8   81.30    5.21
  -1 -26  -8   71.66    4.21
  -1  26  -8   78.99    5.12
   1  26   9    9.03    2.47
  -1  26  -9    6.78    2.53
   1 -26   9    2.51    2.42
  -1 -26  -9    4.31    2.16
  -1 -26 -10   42.89    3.57
   1  26  10   51.50    3.99
  -1  26 -10   45.64    4.04
   1 -26  10   42.97    4.16
  -1  26 -11    7.72    2.63
  -1 -26 -11    9.19    2.26
   1  26  11   10.81    2.53
   1 -26  11    9.73    2.84
   1 -26  12    6.30    2.79
  -1  26 -12    5.87    2.51
  -1 -26 -12    9.23    2.54
   1  26  12    8.72    2.43
  -1 -26 -13    0.09    1.97
  -1  26 -13    1.57    2.22
   1 -26  13   -1.52    2.56
   1  26  13   -0.63    2.02
  -1  26 -14   -1.29    2.36
   1  26  14    1.81    2.23
  -1 -26 -14   -3.20    2.16
   1 -26  14   -0.59    2.56
  -1  26 -15   25.81    3.52
   1  26  15   28.15    3.29
   1 -26  15   20.98    3.61
  -1 -26 -15   23.94    3.13
  -1 -26 -16    5.14    2.25
   1 -26  16    0.83    2.81
  -1  26 -16    4.00    2.65
  -1  26 -17    4.32    2.65
  -1 -26 -17    1.09    2.13
   1 -26  17    0.97    2.76
  -1  26 -18    3.42    2.62
   1 -26  18    4.37    3.02
  -1 -26 -18    7.50    2.49
   1 -26  19    3.67    2.93
  -1 -26 -19    3.86    2.34
  -1  26 -19    3.99    2.93
   1 -26  20    0.15    3.13
  -1 -26 -20   -0.15    2.34
  -1  26 -20    4.66    2.82
  -1 -26 -21    0.13    2.30
   1 -26  21   -0.20    2.91
  -1  26 -21   -2.00    2.72
  -1  26 -22   -3.37    3.03
  -1 -26 -22    1.99    2.56
  -1 -26 -23   10.39    3.02
  -1  26 -23   10.45    3.52
  -1  26 -24   31.12    4.41
  -1 -26 -24   24.36    3.63
  -1 -26 -25    7.87    3.12
  -1  26 -25   11.21    3.41
  -1  26 -26   20.06    4.15
  -1 -26 -26   18.56    3.60
  -1 -26 -27    4.62    3.10
  -1  26 -27    1.63    3.09
  -1 -26 -28    3.30    3.07
  -1  26 -28    0.46    3.30
  -1 -26 -29   -3.00    2.98
  -1 -26 -30    4.22    3.18
  -1 -26 -31    4.95    3.27
   1 -27 -29   -1.50    3.37
   1 -27 -28   -3.33    3.18
   1 -27 -27    3.63    3.08
   1  27 -27    6.19    3.67
   1  27 -26    0.34    3.26
   1 -27 -26   -1.44    3.08
   1  27 -25    6.01    3.37
   1 -27 -25    2.68    2.90
   1 -27 -24    0.43    2.83
   1  27 -24   -0.53    3.03
   1 -27 -23   10.77    3.02
   1  27 -23   14.54    3.65
   1  27 -22    1.30    2.77
   1 -27 -22   -1.72    2.84
   1 -27 -21   12.13    3.19
  -1 -27  21    6.23    3.40
   1  27 -21    7.44    3.10
   1  27 -20   -3.74    2.74
   1 -27 -20    1.59    2.59
  -1 -27  20    4.26    3.16
   1 -27 -19   24.04    3.64
   1  27 -19   18.37    3.67
  -1 -27  18    5.98    3.14
   1  27 -18   10.19    3.06
   1 -27 -18   13.46    3.09
   1  27 -17   12.94    3.04
  -1 -27  17   16.58    3.78
  -1  27  17   14.34    3.13
   1 -27 -17   14.05    3.09
  -1 -27  16    4.73    3.04
  -1  27  16    2.04    2.52
   1 -27 -16    2.62    2.53
   1  27 -16    0.95    2.61
   1 -27 -15   10.62    2.88
  -1 -27  15    4.96    2.91
   1  27 -15    6.62    2.90
  -1  27  15    7.61    2.70
[truncated: 4,141,869 more chars]
